# Supplementary material for: Environment-induced same-sex mating in the yeast Candida albicans through the Hsf1–Hsp90 pathway
Source: PLoS Biol. 2019 Mar 13;17(3):e2006966. doi: 10.1371/journal.pbio.2006966 (PMC6415874; doi:10.1371/journal.pbio.2006966)
Supplement: S1 Data — RNA-Seq, RNA sequencing (XLSX) [file pbio.2006966.s010.xlsx]

## Sheet: All genes
Expression profiles of all genes
Gene	ORF (22nd)	FPKM of YP-K_1	FPKM of YP-K_2	FPKM of YPD-K_1	FPKM of YPD-K_2	Log2(YPD-K/YP-K)	FDR adjusted p-value	Functional description
AAF1	orf19.7436	101.115	71.8815	258.459	452.72	2.03947	0.000848373	Possible regulatory protein; possible adhesin-like; Glu-rich domain; production in S. cerevisiae increases endothelial cell adherence and flocculence; flow model biofilm, alkaline or caspofungin induced
AAH1	orf19.2251	107.467	133.411	65.1123	232.629	0.305759	0.766079	Adenine deaminase; purine salvage and nitrogen catabolism; colony morphology-related regulation by Ssn6; Hog1, CO2-induced; chlamydospore formation repressed in C. albicans and C. dubliniensis; rat catheter and F-12/CO2 biofilm induced
AAP1	orf19.2810	13.9396	18.7719	12.9647	10.5916	-0.473689	0.386005	Putative amino acid permease; fungal-specific; possibly essential, disruptants not obtained by UAU1 method; Spider biofilm induced
AAT1	orf19.3554	357.213	346.569	158.238	226.984	-0.869441	0.0656686	Aspartate aminotransferase; soluble protein in hyphae; macrophage-induced protein; alkaline upregulated; amphotericin B repressed; gene used for strain identification by multilocus sequence typing; farnesol-, Hap43p-induced; GlcNAc-induced
AAT21	orf19.6287	482.742	590.637	147.795	177.728	-1.72133	0.000848373	Putative aspartate aminotransferase; stationary phase enriched protein; Gcn4-regulated; Spider biofilm induced
AAT22	orf19.4669	94.6602	83.7745	44.1877	130.729	-0.0287292	0.975019	Aspartate aminotransferase; nitrogen metabolism; similar but not orthologous to S. cerevisiae Aat2; clade-associated gene expression; protein levels decrease in stationary phase yeast; mutant is viable; flow model biofilm repressed
ABC1	orf19.3331	505.126	392.681	593.527	758.21	0.590336	0.281414	Putative ubiquinol-cytochrome-c reductase; induced upon adherence to polystyrene; flow model biofilm induced; Spider biofilm induced
ABD1	orf19.6716	35.9529	40.3352	37.8711	34.7425	-0.0712185	0.930295	SAM-dependent RNA methyltransferase; methylates mRNA 5' cap; binds phosphorylated RNA Pol II C-term domain peptide; does not bind mRNA TPase and mRNA GTase (Cet1,Cgt1); functional homolog of S. cerevisiae Abd1; rat catheter biofilm induced
ABG1	orf19.1597	155.219	170.974	93.0915	85.4133	-0.869766	0.0408776	Vacuolar membrane protein; depletion causes abnormal vacuolar morphology, cell separation defect, sensitivity to cell wall stress, increased hyphal branching; essential, no mammalian homolog; Cyr1-regulated; rat catheter biofilm repressed
ABP1	orf19.2699	269.722	288.485	202.52	147.28	-0.67427	0.186257	Ortholog of S. cerevisiae Abp1; actin-binding protein of the cortical actin cytoskeleton; caspofungin induced; protein only detected in stationary phase yeast-form cultures; Spider biofilm repressed
ABP140	orf19.3676	59.8903	49.2262	38.0454	85.6055	0.180403	0.843048	Ortholog of S. cerevisiae actin-binding protein Abp140; Hap43-induced; F-12/CO2 early biofilm induced
ABP2	orf19.3529	2.60782	1.4763	2.83297	3.0429	0.524776	0.589796	Putative alpha-actinin-like protein; induced by alpha pheromone in SpiderM medium
ABZ1	orf19.1291	29.331	30.4212	35.4755	36.6141	0.270797	0.645969	Ortholog(s) have 4-amino-4-deoxychorismate synthase activity and role in para-aminobenzoic acid biosynthetic process
ACB1	orf19.7043.1	639.585	797.783	844.438	694.579	0.098579	0.901795	Protein similar to a region of acyl-coenzyme-A-binding protein; amphotericin B repressed; regulated by Nrg1, Tup1; Hap43-induced
ACC1	orf19.7466	221.3	322.288	253.502	227.427	-0.176688	0.864802	Putative acetyl-coenzyme-A carboxylases; regulated by Efg1; amphotericin B repressed; caspofungin repressed; 5'-UTR intron; gene used for strain identification by multilocus sequence typing; Hap43-induced; flow model biofilm repressed
ACE2	orf19.6124	55.485	46.1948	24.7701	22.8101	-1.0956	0.00862192	Transcription factor; similar to S. cerevisiae Ace2 and Swi5; regulates morphogenesis, cell separation, adherence, virulence in a mice; mutant is hyperfilamentous; rat catheter and Spider biofilm induced
ACF2	orf19.3417	14.3301	14.213	17.5005	12.6241	0.0777993	0.924321	Putative endo-1,3-beta-glucanase; fungal-specific (no human or murine homolog)
ACH1	orf19.3171	330.863	276.316	715.27	851.33	1.36744	0.00495977	Acetyl-coA hydrolase; acetate utilization; nonessential; soluble protein in hyphae; antigenic in human; induced on polystyrene adherence; farnesol-, ketoconazole-induced; no human or murine homolog; stationary phase-enriched protein
ACO1	orf19.6385	975.703	1073.77	674.36	549.115	-0.744266	0.13736	Aconitase; induced in high iron; 2 upstream CCAAT motifs; amino acid starvation (3-AT), amphotericin B, phagocytosis, farnesol induced; Hap43, fluconazole-repressed; Gcn4-regulated; antigenic in infection; flow and Spider biofilm repressed
ACO2	orf19.6632	66.6069	76.0603	42.0355	38.7085	-0.821226	0.064569	Putative aconitate hydratase 2; induced in high iron; regulated by Gcn4; repressed by amino acid starvation (3-AT); protein levels decrease in stationary phase yeast; flow model and Spider biofilm repressed
ACP1	orf19.2439	115.501	134.042	108.164	135.413	-0.0349106	0.968344	Putative mitochondrial acyl carrier protein involved in fatty acid biosynthesis; shows colony morphology-related gene regulation by Ssn6p; protein newly produced during adaptation to the serum
ACP12	orf19.819	618.467	703.667	365.239	389.881	-0.808089	0.0589626	Putative mitochondrial acyl carrier protein
ACS1	orf19.1743	411.652	463.354	97.1849	127.465	-1.96162	0.000848373	Acetyl-CoA synthetase; induced by human neutrophils; fluconazole-repressed; regulated by Nrg1/Mig1; colony morphology-related gene regulation by Ssn6; only in stationary phase cultures; rat catheter biofilm repressed, Spider biofilm induced
ACS2	orf19.1064	333.922	482.795	472.645	349.73	0.00996072	0.991009	Acetyl-CoA synthetase; antigenic during human and murine infection; induced by Efg1; macrophage-induced protein; soluble protein in hyphae; gene contains intron; flow model and Spider biofilm repressed
ACT1	orf19.5007	1281.27	1460.91	790.051	597.734	-0.982538	0.0348153	Actin; gene has intron; transcript regulated by growth phase, starvation; at polarized growth site in budding and hyphal cells; required for wild-type Cdc42 localization; unprocessed N terminus; Hap43-induced; Spider biofilm repressed
ADA2	orf19.2331	47.4528	50.6223	84.5861	81.7096	0.761792	0.0785939	Zinc finger and homeodomain transcriptional coactivator; role in cell wall integrity and in sensitivity to caspofungin; required for the normal transcriptional response to caspofungin; required for yeast cell adherence to silicone substrate
ADAEC	orf19.868	152.238	118.853	187.415	288.57	0.812136	0.088347	Protein of unknown function; transcription is specific to white cell type
ADE1	orf19.7484	118.719	102.86	86.727	81.4318	-0.397994	0.454133	Phosphoribosylaminoimadazole succinocarboxamide synthetase, enzyme of adenine biosynthesis; not induced in GCN response, unlike the S. cerevisiae ortholog; fungal-specific (no human or murine homolog); levels decrease in stationary phase
ADE12	orf19.4827	423.98	402.81	276.906	346.897	-0.406431	0.492585	Adenylosuccinate synthase; upregulated in biofilm; decreased expression in hyphae vs yeast-form cells; not induced during GCN response, in contrast to S. cerevisiae ADE12, which is induced by Gcn4p; stationary phase-enriched protein
ADE13	orf19.3870	198.384	189.893	151.98	134.836	-0.43696	0.425402	Adenylosuccinate lyase; enzyme of adenine biosynthesis; soluble protein in hyphae; not induced during GCN response, in contrast to the S. cerevisiae ortholog; repressed by nitric oxide
ADE17	orf19.492	292.95	307.243	269.685	191.74	-0.379334	0.527766	5-Aminoimidazole-4-carboxamide ribotide transformylase, enzyme of adenine biosynthesis; antigenic in human; soluble protein in hyphae; not induced during GCN response, in contrast to the S. cerevisiae ortholog
ADE2	orf19.5906	77.0995	65.9509	58.3391	88.4123	0.0368509	0.967854	Phosphoribosylaminoimadazole carboxylase; role in adenine biosynthesis; required for normal growth and virulence in immunosuppressed mouse infection; not induced in GCN response, in contrast to S. cerevisiae ADE2; stationary phase-enriched
ADE4	orf19.1233	117.092	122.283	132.807	186.294	0.414739	0.455032	Putative phosphoribosylpyrophosphate amidotransferase; flucytosine induced
ADE5,7	orf19.5061	134.752	133.2	80.6787	109.33	-0.49591	0.352002	Phosphoribosylamine-glycine ligase and phosphoribosylformylglycinamidine cyclo-ligase; interacts with Vps34p; required for hyphal growth and virulence; flucytosine induced; not induced in GCN response, in contrast to S. cerevisiae ortholog
ADE6	orf19.6317	55.2412	56.9991	62.5683	75.3495	0.297218	0.637852	5-Phosphoribosylformyl glycinamidine synthetase; adenine biosynthesis; not induced in GCN response, in contrast to S. cerevisiae Ade6; protein in stationary phase yeast-form cultures; flow model and rat catheter biofilm repressed
ADE8	orf19.5789	200.009	152.934	98.0957	130.199	-0.62854	0.909557	Putative phosphoribosylglycinamide formyl-transferase, enzyme of amino acid biosynthesis pathway; upregulated in biofilm; S. cerevisiae ortholog is Gcn4p regulated; protein enriched in stationary phase yeast-form cultures
ADH1	orf19.3997	4328.07	3312.42	5393.42	3089.11	0.15083	0.854743	Alcohol dehydrogenase; oxidizes ethanol to acetaldehyde; at yeast cell surface; immunogenic in humans/mice; complements S. cerevisiae adh1 adh2 adh3 mutant; fluconazole, farnesol-induced; flow model biofilm induced; Spider biofilm repressed
ADH2	orf19.5113	3152.03	4211.87	966.992	354.637	-2.47815	0.000848373	Alcohol dehydrogenase; soluble in hyphae; expression regulated by white-opaque switching; regulated by Ssn6; indued by Mnl1 in weak acid stress; protein enriched in stationary phase yeast cultures; Spider biofilm induced
ADH3	orf19.4505	170.726	183.226	89.2449	52.9765	-1.31542	0.0141975	Putative NAD-dependent (R,R)-butanediol dehydrogenase; regulated by white-opaque switch; induced by nitric oxide independent of Yhb1; Spider biofilm induced
ADH4	orf19.271	3.08953	3.28508	1.26353	2.32937	-0.827185	0.541698	Predicted 3-hydroxyacyl-CoA dehydrogenase; transcript is increased in azole-resistant strain overexpressing MDR1; transcript is increased in populations of cells exposed to fluconazole over multiple generations; mutant is viable
ADH5	orf19.2608	1894.2	1368.07	2379.45	1441.32	0.227986	0.755845	Putative alcohol dehydrogenase; regulated by white-opaque switch; fluconazole-induced; antigenic in murine infection; regulated by Nrg1, Tup1; Hap43, macrophage repressed, flow model biofilm induced; Spider biofilm induced
ADK1	orf19.3391	409.183	444.352	313.937	298.588	-0.47868	0.374542	Putative adenylate kinase; repressed in hyphae; macrophage-induced protein; adenylate kinase release used as marker for cell lysis; possibly essential (UAU1 method); flow model biofilm induced; rat catheter and Spider biofilm repressed
ADO1	orf19.5591	138.664	143.158	148.67	159.907	0.130842	0.866588	Adenosine kinase; heterozygous null mutant is resistant to cordycepin in C. albicans fitness test; ketoconazole-induced; protein level decrease in stationary phase cultures; sumoylation target; Spider biofilm repressed
ADP1	orf19.459	36.8218	43.8976	38.2381	28.4689	-0.275078	0.653829	Putative PDR-subfamily ABC transporter; similar to WHITE subfamily proteins; gene used for strain identification by multilocus sequence typing
ADR1	orf19.2752	50.4544	67.3307	103.232	146.803	1.08597	0.0238429	C2H2 transcription factor; ortholog of S. cerevisiae Adr1 but mutant phenotype suggests a different set of target genes; transposon mutation affects filamentous growth; Spider biofilm induced
AFG1	orf19.4743	6.96742	13.6944	10.8313	6.85636	-0.224221	0.769875	Putative mitochondrial ATPase of the AAA family; similar but not orthologous to S. cerevisiae Afg1; mutant is viable; regulated by Sef1, Sfu1, and Hap43
AFG3	orf19.1669	58.2444	65.2056	73.0025	73.0635	0.242693	0.717375	Similar to S. cerevisiae Afg3p, a subunit of the mitochondrial inner membrane m-AAA protease; likely to be essential for growth, based on an insertional mutagenesis strategy
AFL1	orf19.980	187.897	129.499	142.368	245.444	0.289074	0.665461	Ortholog(s) have 2 iron, 2 sulfur cluster binding, diphosphoinositol-pentakisphosphate kinase activity and inositol 1,5-bisdiphosphate 2,3,4,6-tetrakisphosphate 1-diphosphatase activity, more
AFP99	orf19.5862	19.0517	25.4213	15.2968	8.78146	-0.885197	0.0686865	Protein related to arginases; downregulated upon adherence to polystyrene; regulated by Gcn2p and Gcn4p
AFT2	orf19.2272	31.8007	30.2281	44.4387	60.2452	0.755029	0.101383	Putative Aft domain transcription factor; role in regulation of iron metabolism, oxidative stress, adhesion, hyphal growth, colony morphology, virulence; complements S. cerevisiae aft1 mutation; Spider biofilm induced
AGA1	orf19.935	305.758	371.105	210.415	233.106	-0.609862	0.228744	Protein with some similarity to agglutinin subunit; expression regulated upon white-opaque switch; Spider biofilm induced
AGC1	orf19.4966	184.171	189.068	152.493	351.482	0.433251	0.492641	Putative mitochondrial carrier protein; transcript is alkaline upregulated rat catheter biofilm induced
AGE1	orf19.3050	58.4484	47.7218	61.2039	42.7933	-0.0298341	0.973593	Putative GTPase activator; induced in low iron; rat catheter biofilm repressed
AGE2	orf19.1396	44.9913	48.2529	54.013	45.5795	0.0950234	0.905368	Ortholog(s) have GTPase activator activity and role in ER to Golgi vesicle-mediated transport, intra-Golgi vesicle-mediated transport
AGE3	orf19.3683	67.5785	67.5883	45.8267	63.0441	-0.312125	0.589551	Putative ADP-ribosylation factor GTPase activating protein, functional ortholog of S. cerevisiae GCS1; mutation affects endocytosis, hyphal growth, chemical and drug resistance, and sensitivity to cell wall inhibitors
AGM1	orf19.5013	31.1712	41.5032	23.0808	15.4546	-0.915262	0.0337151	Phosphoacetylglucosamine mutase (N-acetylglucosamine-phosphate mutase); enzyme of UDP-N-acetylglucosamine (UDP-GlcNAc) biosynthesis
AGO1	orf19.2903	34.5673	51.2539	33.6395	21.6811	-0.633516	0.191033	Putative Argonaute protein involved in RNA silencing; hyphal-induced expression; regulated by Cyr1, Ras1, Efg1, Nrg1, Tup1; rat catheter biofilm repressed
AGP2	orf19.4679	75.2937	77.7775	416.622	755.5	2.93685	0.000848373	Amino acid permease; hyphal repressed; white-opaque switch regulated; induced in core caspofungin response, during cell wall regeneration, by flucytosine; regulated by Sef1, Sfu1, and Hap43; rat catheter and Spider biofilm induced
AGP3	orf19.3795	11.289	17.9741	21.4389	26.2183	0.70361	0.143272	Putative serine transporter; possible role in assimilation of sulfur; F-12/CO2 early biofilm induced
AHA1	orf19.7602	57.6666	59.9673	44.1121	28.0186	-0.70562	0.123164	Putative Hsp90p co-chaperone; Hap43-repressed; heavy metal (cadmium) stress-induced; oxidative stress-induced via Cap1; rat catheter biofilm induced; flow model biofilm repressed
AHP1	orf19.2762	355.559	306.098	956.911	790.232	1.40084	0.00156339	Alkyl hydroperoxide reductase; immunogenic; fluconazole-induced; amphotericin B, caspofungin, alkaline repressed; core stress response induced; Ssk1/Nrg1/Tup1/Ssn6/Hog1 regulated; flow model biofilm induced; rat catheter biofilm repressed
AHP2	orf19.6470	157.38	144.178	119.66	72.994	-0.646424	0.175617	Putative thiol-specific peroxiredoxin; macrophage-downregulated gene
AHR1	orf19.7381	31.6371	31.2242	40.9931	41.6439	0.394615	0.473559	Zn(II)2Cys6 transcription factor; involved in regulation of adhesion genes; involved in white-opaque switch; forms complex with Mcm1; mutant is sensetive to 5-fluorocytosine and lithium chloride; Spider biofilm induced
AIF1	orf19.3362	48.4452	36.5974	12.1449	13.8811	-1.70824	0.000848373	Has domain(s) with predicted flavin adenine dinucleotide binding, oxidoreductase activity and role in oxidation-reduction process
AIP2	orf19.300	138.699	163.89	68.654	64.656	-1.18257	0.00280222	Putative actin interacting protein; regulated by Gcn4; induced in response to amino acid starvation (3-AT); repressed by elevated CO2; flow model biofilm repressed
AKL1	orf19.5357	38.6854	37.1	70.4994	52.4494	0.698066	0.134387	Putative serine/threonine protein kinase; induced during the mating process
AKR1	orf19.4950	61.6898	42.8887	73.3434	126.458	0.933983	0.0421234	Ankyrin-repeat protein; induced by fluphenazine
ALA1	orf19.5746	89.4379	109.851	78.6817	97.0129	-0.181793	0.806605	Alanyl-tRNA synthetase; translational regulation generates cytoplasmic and mitochondrial forms; Gcn4p-regulated; repressed by amino acid starvation (3-AT); translation-related genes downregulated upon phagocytosis by murine macrophages
ALD5	orf19.5806	2285	2348.55	1339.55	1414.75	-0.750436	0.129388	NAD-aldehyde dehydrogenase; decreased expression in fluconazole-resistant isolate, or in hyphae; biofilm induced; fluconazole-downregulated; protein abundance is affected by URA3 expression in the CAI-4 strain; stationary phase enriched
ALD6	orf19.742	155.597	140.372	150.815	89.8288	-0.298545	0.651937	Putative aldehyde dehydrogenase; stationary phase enriched protein; expression regulated upon white-opaque switch; rat catheter biofilm induced; rat catheter and Spider biofilm induced
ALG1	orf19.4410	18.4039	15.6801	13.6473	11.9262	-0.414446	0.497379	Protein similar to S. cerevisiae Alg1p, a mannosyltransferase involved in N-linked protein glycosylation; likely to be essential for growth, based on an insertional mutagenesis strategy
ALG11	orf19.3468	21.6268	22.4426	21.036	43.2069	0.54376	0.278781	Alpha-1,2-mannosyltransferase; catalyzes sequential addition of 2 terminal alpha 1,2-mannose residues to the Man5GlcNAc2-PP-dolichol intermediate during asparagine-linked glycosylation in the ER; Spider biofilm induced
ALG2	orf19.1221	25.6311	34.6693	30.6451	27.0434	-0.0638851	0.938366	Putative mannosyltransferase involved in cell wall mannan biosynthesis; transcription is elevated in chk1, nik1, and sln1 homozygous null mutants
ALG5	orf19.2837	34.1133	40.0305	17.5571	11.2959	-1.3616	0.00495977	Putative glucosyltransferase involved in cell wall mannan biosynthesis; possibly an essential gene, disruptants not obtained by UAU1 method
ALG6	orf19.1843	8.48496	13.7954	6.32299	6.07991	-0.845096	0.420892	Putative glucosyltransferase involved in cell wall mannan biosynthesis; transcription is elevated in chk1, nik1, and sln1 homozygous null mutants; repressed by nitric oxide; possibly essential gene, disruptants not obtained by UAU1 method
ALG7	orf19.2187	23.5828	20.6514	20.6976	17.0412	-0.229113	0.724727	Protein involved in cell wall mannan biosynthesis; mutation confers hypersensitivity to tunicamycin; transcript elevated in chk1, nik1, and sln1 homozygous null mutants; possibly essential gene, disruptants not obtained by UAU1 method
ALG8	orf19.1659	11.5735	18.3652	14.3854	15.032	-0.0253419	0.976424	Putative glucosyltransferase involved in cell wall mannan biosynthesis; transcription is elevated in nik1 and sln1 homozygous null mutants, but not in the chk1 null mutant; possibly an essential gene, disruptants not obtained by UAU1 method
ALG9	orf19.4442	27.686	33.2278	26.7368	22.3651	-0.310992	0.596862	Putative mannosyltransferase; similar to S. cerevisiae Alg9p; has HKEXRF motif
ALI1	orf19.1710	74.7815	100.627	82.6726	78.3972	-0.12303	0.871092	Putative NADH-ubiquinone oxidoreductase; in detergent-resistant membrane fraction (possible lipid raft component); predicted N-terminal acetylation; nitric oxide-repressed; plasma membrane-localized; protein decreases in stationary phase
ALK2	orf19.7513	56.1067	65.8014	103.549	79.1242	0.583473	0.232243	N-Alkane inducible cytochrome P450
ALK6	orf19.6574	6.43669	4.83206	3.22199	3.24977	-0.800098	0.265882	Putative cytochrome P-450 of N-alkane-induced detoxification; macrophage-induced gene
ALK8	orf19.10	141.01	108.375	14.0044	12.8378	-3.2158	0.000848373	Alkane-inducible cytochrome P450; catalyzes hydroxylation of lauric acid to hydroxylauric acid; overproduction causes fluconazole resistance in WT and causes multidrug resistance in a cdr1 cdr2 double mutant; rat catheter biofilm repressed
ALO1	orf19.7551	177.248	169.646	118.19	123.404	-0.521908	0.32137	D-Arabinono-1,4-lactone oxidase involved in biosynthesis of dehydro-D-arabinono-1,4-lactone, which has a protective role against oxidative damage; plasma membrane-localized;required for full virulence in a mouse model of systemic infection
ALP1	orf19.2337	33.4678	32.4376	38.2742	50.0661	0.422673	0.433113	Cystine transporter; present in pathogenic yeasts (no human or murine homolog); Spider biofilm induced
ALR1	orf19.1607	402.964	308.539	412.925	575.914	0.474867	0.422478	Putative transporter of divalent cations; hyphal-induced expression; rat catheter biofilm induced
ALS1	orf19.5741	32.3414	30.9419	316.057	715.524	4.02689	0.000848373	Cell-surface adhesin; adhesion, virulence, immunoprotective roles; band at hyphal base; Rfg1, Ssk1, Spider biofilm induced; flow model biofilm repressed; CAI-4 strain background effects; promoter bound Bcr1, Tec1, Efg1, Ndt80, and Brg1
ALS2	orf19.1097	13.2198	13.6362	40.5169	38.1735	1.55094	0.00986577	ALS family protein; role in adhesion, biofilm formation, germ tube induction; expressed at infection of human buccal epithelial cells; putative GPI-anchor; induced by ketoconazole, low iron and at cell wall regeneration; regulated by Sfu1p
ALS3	orf19.1816	4.27324	0.953977	11.7708	10.5162	2.09209	0.219504	Cell wall adhesin; epithelial adhesion, endothelial invasion; alleles vary in adhesiveness; immunoprotective in mice; binds SspB adhesin of S. gordonii in mixed biofilm; induced in/required for Spider biofilm; flow model biofilm repressed
ALS4	orf19.4555	5.07069e-36	1.07072	0.571652	1.96699	1.24547	0.788826	GPI-anchored adhesin; role in adhesion, germ tube induction; growth, temperature regulated; expressed during infection of human buccal epithelial cells; repressed by vaginal contact; biofilm induced; repressed during chlamydospore formation
ALS5	orf19.5736	10.9087	10.5101	23.9878	40.3872	1.58762	0.000848373	ALS family adhesin; highly variable; expression in S. cerevisiae causes adhesion to human epithelium, endothelium or ECM, endothelial invasiveness by endocytosis and, at high abundance, ECM-induced aggregation; can form amyloid fibrils
ALS6	orf19.7414	11.5062	12.6369	7.3372	10.9092	-0.403999	0.439408	ALS family protein; expression in S. cerevisiae confers adhesion to gelatin; macrophage-induced gene; N-terminal adhesion domain; ALS family includes cell-surface glycoproteins, some with adhesin function
ALS7	orf19.7400	7.04898	5.66547	10.7906	16.744	1.11478	0.00986577	ALS family protein; hypermutable contingency gene; growth-regulated, downregulated in biofilm; two variable repeat regions; expression in S. cerevisiae does not confer adhesiveness; ALS family includes adhesins, cell-surface glycoproteins
ALS9	orf19.5742	7.46521	6.17505	17.0246	18.2134	1.36926	0.000848373	ALS family cell-surface glycoprotein; expressed during infection of human epithelial cells; confers laminin adhesion to S. cerevisiae; highly variable; putative GPI-anchor; Hap43-repressed
ALT1	orf19.346	92.1295	107.255	72.9111	81.9988	-0.364125	0.52918	Putative alanine transaminase; mutation confers hypersensitivity to 5-fluorocytosine (5-FC); rat catheter and flow model biofilm induced
AMN1	orf19.1507	7.46687	11.3421	5.72578	6.24724	-0.651635	0.257134	Putative negative regulator of exit from mitosis; Plc1-regulated; rat catheter biofilm induced
AMO1	orf19.5784	29.1024	29.0443	28.8939	20.1437	-0.245809	0.693052	Putative peroxisomal copper amine oxidase
AMO2	orf19.3152	148.415	117.37	15.1811	18.7807	-2.96828	0.000848373	Protein similar to A. niger predicted peroxisomal copper amino oxidase; mutation confers hypersensitivity to toxic ergosterol analog; F-12/CO2 early biofilm induced
AMS1	orf19.2768	187.7	243.101	242.596	166.111	-0.0759538	0.934926	Putative alpha-mannosidase; transcript regulated by Nrg1; induced during cell wall regeneration; flow model biofilm induced; Spider biofilm induced
ANB1	orf19.3426	2583.2	2912.3	1777.6	1896.37	-0.58091	0.286821	Translation initiation factor eIF-5A; repressed in hyphae vs yeast cells; downregulated upon phagocytosis by murine macrophage; Hap43-induced; GlcNAc-induced protein; Spider biofilm repressed
ANP1	orf19.3622	50.5594	43.641	43.9507	48.6764	-0.0242982	0.977864	Putative mannosyltransferase of Golgi; member of Mnn9p family; similar to S. cerevisiae Anp1p; fungal-specific (no human or murine homolog)
ANT1	orf19.6254	69.3357	93.7853	195.855	356.979	1.7609	0.000848373	Peroxisomal adenine nucleotide transporter; role in beta-oxidation of medium-chain fatty acid and peroxisome proliferation; rat catheter biofilm induced
AOX1	orf19.4774	12.1036	17.316	19.2395	9.57374	-0.0300487	0.976061	Alternative oxidase; low abundance; constitutively expressed; one of two isoforms (Aox1p and Aox2p); involved in a cyanide-resistant respiratory pathway present in plants, protists, and some fungi, absent in S. cerevisiae; Hap43p-repressed
AOX2	orf19.4773	789.248	499.793	897.751	827.265	0.420311	0.492585	Alternative oxidase; cyanide-resistant respiration; induced by antimycin A, oxidants; growth; Hap43, chlamydospore formation repressed; rat catheter, Spider biofilm induced; regulated in Spider biofilms by Bcr1, Tec1, Ndt80, Brg1
APA2	orf19.5630	39.7317	36.3711	47.6177	52.6072	0.397218	0.448217	Putative ATP adenylyltransferase II; regulated by Gcn4; repressed by amino acid starvation (3-AT); induced by prostaglandins; Hap43-repressed; Spider biofilm repressed
APC1	orf19.6046	11.6552	12.1317	16.108	13.5708	0.319268	0.585548	Putative Anaphase-Promoting Complex/Cyclosome subunit; essential for growth; periodic mRNA expression, peak at cell-cycle S/G2 phase
APE2	orf19.5197	186.479	210.743	185.723	133.807	-0.313991	0.63178	Neutral arginine, alanine, leucine specific metallo-aminopeptidase; purified from cell wall/intracellular fractions; protein repressed during mating; Hog1, farnesol-induced; may be essential (UAU1 method); rat catheter biofilm repressed
APE3	orf19.3591	65.3954	66.244	39.7802	28.4859	-0.947351	0.0309848	Putative vacuolar aminopeptidase Y,; regulated by Gcn2 and Gcn4; rat catheter and Spider biofilm repressed
APG7	orf19.707	6.94542	10.5413	14.7649	8.55476	0.415286	0.505629	Ortholog(s) have Atg12 activating enzyme activity, Atg8 activating enzyme activity
APL2	orf19.231	17.3025	17.8455	12.1161	11.1907	-0.592692	0.223	Phosphorylated protein of unknown function; mutation confers hypersensitivity to toxic ergosterol analog
APL4	orf19.2844	17.2635	20.2888	16.5277	12.9018	-0.351637	0.539423	Predicted gamma-adaptin, large subunit of the clathrin-associated protein (AP-1) complex; that binds clathrin and is involved in vesicle mediated transport; induced in core caspofungin response; rat catheter biofilm repressed
APL5	orf19.248	26.832	27.0511	25.5732	27.8329	-0.0128294	0.986783	Ortholog of S. cerevisiae and S. pombe Apl5; subunit of the AP-3 adaptor complex involved in Golgi-to-vacuole transport; phosphorylated protein; mutant is viable;
APM1	orf19.4036	37.5335	52.1412	44.392	40.2553	-0.0832368	0.917705	Ortholog of S. cerevisiae/S. pombe Apm1; a clathrin-associated protein complex (AP-1) subunit; phosphorylated protein; Tn mutation affects filamentous growth; Spider biofilm repressed
APM4	orf19.2194	11.9081	15.3083	22.7536	14.1138	0.437874	0.445151	Cargo-binding subunit of the clathrin associated protein complex (AP-2), involved in endocytosis
APN1	orf19.7428	76.9867	80.9032	51.8525	57.3241	-0.532255	0.829151	Ortholog of S. cerevisiae Apn1; an AP endonuclease; transcript induced by interaction with macrophages; fungal-specific (no human or murine homolog)
APN2	orf19.1836	34.3164	36.3069	17.5955	24.3284	-0.752371	0.0967708	Putative class II abasic (AP) endonuclease; flucytosine induced
APR1	orf19.1891	297.368	282.206	505.504	327.06	0.522566	0.355178	Vacuolar aspartic proteinase; transcript equivalent in yeast-form and mycelial cells but is elevated at lower growth temperatures; upregulated iby human neutrophils; protein enriched in stationary phase; Spider biofilm induced
APS3	orf19.393	32.7886	48.7449	31.0098	23.544	-0.579713	0.366466	Component of the adaptor complex AP-3, which is involved in vacuolar protein sorting
APT1	orf19.1448	159.005	164.228	164.816	182.556	0.103905	0.891493	Adenine phosphoribosyltransferase; flucytosine induced; repressed by nitric oxide; protein level decreased in stationary phase yeast cultures
AQY1	orf19.2849	1556.01	980.417	1379.01	1311.88	0.085289	0.921934	Aquaporin water channel; osmotic shock resistance, WT freeze tolerance; virulent in mice; flucytosine repressed; flow model/RPMI/Spider/rat catheter biofilm induced; required for RPMI biofilm formation; Bcr1-induced in a/a RPMI biofilms
ARA1	orf19.2172	53.7667	47.507	47.6354	38.6483	-0.231099	0.720849	D-Arabinose dehydrogenase; dehydro-D-arabinono-1,4-lactone synthesis; active on D-arabinose, L-fucose, L-xylose, L-galactose; inhibited by metal ions, thiol group-specific reagents; induced on polystyrene adherence; Spider biofilm induced
ARC1	orf19.2422	219.479	208.672	185.482	236.011	-0.0226117	0.979635	Putative G4 nucleic acid binding protein; macrophage/pseudohyphal-repressed; protein enriched in stationary phase yeast-form cultures; Spider biofilm repressed
ARC15	orf19.6151	131.884	136.4	112.737	126.797	-0.16353	0.814203	Putative ARP2/3 complex subunit; mutation confers hypersensitivity to cytochalasin D
ARC18	orf19.121	21.8966	29.4063	13.3802	12.7135	-0.97534	0.149151	Putative ARP2/3 complex subunit; mutation confers hypersensitivity to cytochalasin D
ARC19	orf19.3251	43.8009	25.6548	12.2396	19.4905	-1.13024	0.0639172	Putative ARP2/3 complex subunit; Hap43-induced gene; mutation confers hypersensitivity to cytochalasin D; rat catheter biofilm repressed
ARC35	orf19.2437	43.1442	50.4725	37.3006	37.6998	-0.319867	0.578696	Putative ARP2/3 complex subunit; shows colony morphology-related gene regulation by Ssn6p; mutation confers hypersensitivity to cytochalasin D
ARC40	orf19.3873	100.637	123.698	54.6194	43.8056	-1.18856	0.000848373	Protein similar to S. cerevisiae Arc40; involved in actin filament organization in S. cerevisiae; transposon mutation affects filamentous growth; rat catheter and Spider biofilm repressed
ARD	orf19.6322	3413.86	2476.84	2071.18	2201.93	-0.463155	0.440602	D-arabitol dehydrogenase, NAD-dependent (ArDH); enzyme of D-arabitol and D-arabinose catabolism; D-arabitol is a marker for active infection in humans; rat catheter and Spider biofilm induced
ARE2	orf19.2248	22.6428	24.1146	32.0549	22.1604	0.213506	0.744155	Acyl CoA:sterol acyltransferase; uses cholesterol and oleoyl-CoA substrates; protoberberine derivative drug inhibits enzyme activity; ketoconazole-induced; Hap43-repressed; flow model biofilm induced; Spider biofilm induced
ARF1	orf19.6447	256.45	259.919	293.093	246.893	0.0645177	0.938913	Golgi-localized ADP-ribosylation factor involved in regulation of the ER-mitochondria encounter structure (ERMES); one of several C. albicans ADP-ribosylation factors; N-myristoylprotein; substrate of Nmt1; Spider biofilm induced
ARF2	orf19.5964	1390.21	1270.67	805.357	889.108	-0.651074	0.19615	Essential protein, putative ADP-ribosylation factor; involved in invasive growth; mutation confers hypersensitivity to Brefeldin A; Spider biofilm repressed
ARF3	orf19.1702	88.8935	108.788	55.3148	56.2112	-0.825799	0.0747205	Similar to but not orthologous to S. cerevisae Arf3; transcript filament induced; Tup1 regulated; rat catheter biofilm repressed (see Locus History Note for Assembly 19 correction)
ARG1	orf19.7469	387.051	277.042	233.879	437.583	0.0159218	0.986766	Argininosuccinate synthase; arginine synthesis; Gcn4, Rim101 regulated; induced by amino acid starvation (3-AT), benomyl treatment; stationary phase enriched protein; repressed in alkalinizing medium; rat catheter, Spider biofilm induced
ARG11	orf19.5926	20.4558	17.986	22.081	37.2434	0.625953	0.244467	Putative ornithine transporter of the mitochondrial inner membrane; induced during the mating process
ARG2	orf19.56	16.9454	19.3632	18.1683	18.52	0.0150085	0.986049	Putative enzyme of arginine biosynthesis; transcription of genes of arginine biosynthesis pathway, except for ARG2, is induced upon phagocytosis by macrophage
ARG3	orf19.5610	22.7817	13.2904	19.6397	25.6046	0.326852	0.627066	Putative ornithine carbamoyltransferase; Gcn4-regulated; Hap43-induced; repressed in alkalinizing medium; rat catheter and Spider biofilm induced
ARG4	orf19.6689	15.4007	15.4716	25.8007	38.5113	1.05878	0.0152918	Argininosuccinate lyase, catalyzes the final step in the arginine biosynthesis pathway; alkaline downregulated; flow model biofilm induced; Spider biofilm induced
ARG5,6	orf19.4788	32.413	27.1322	54.0245	82.3716	1.19575	0.00445302	Arginine biosynthetic enzyme; processed in S. cerevisiae into 2 polypeptides with acetylglutamate kinase (Arg6) activity and acetylglutamate-phosphate reductase (Arg5) activity; Gcn4 regulated; alkaline repressed; Spider biofilm induced
ARG8	orf19.3770	36.8013	25.2426	42.2913	77.3104	0.946877	0.0290115	Putative acetylornithine aminotransferase; Gcn2, Gcn4 regulated; rat catheter biofilm induced; Spider biofilm induced
ARG81	orf19.4766	24.5452	22.3568	36.65	51.3246	0.907437	0.0375838	Zn(II)2Cys6 transcription factor; required for utilization of ornithine as a nitrogen source and for wild-type resistance to caffeine; required for yeast cell adherence to silicone substrate
ARG83	orf19.2748	12.3595	15.6395	18.2567	22.3504	0.536362	0.277946	GAL4-like Zn(II)2Cys6 transcription factor; clade-associated expression; null shows abnormal regulation of invasive colony growth, is unable to utilize proline as a nitrogen source; flow model biofilm induced
ARH2	orf19.3521	28.3684	28.7824	26.0711	21.3419	-0.269491	0.709326	Putative adrenodoxin-NADPH oxidoreductase; role in heme biosynthesis
ARL1	orf19.4603	56.3501	49.9306	39.8868	41.2106	-0.390153	0.542291	Putative GTPase in the late Golgi involved in regulation of polarized growth and secretion; mutation confers dose-dependent sensitivity to Brefeldin A
ARL3	orf19.2297	17.996	20.2105	27.9205	18.5943	0.283873	0.720519	Putative Ras superfamily GTPase; induced by nitric oxide independent of Yhb1p
ARO1	orf19.4704	61.2786	76.2562	64.0421	64.1678	-0.101289	0.90624	Putative pentafunctional arom enzyme; required for aromatic amino acid biosynthesis; involved in cell wall integrity and formation of biofilm; fungal-specific (no human or murine homolog); Gcn2p-, Gcn4p-regulated
ARO10	orf19.1847	519.048	342.023	97.5189	92.5542	-2.17958	0.000848373	Aromatic decarboxylase; Ehrlich fusel oil pathway of aromatic alcohol biosynthesis; alkaline repressed; protein abundance affected by URA3 expression in CAI-4 strain; Spider biofilm induced
ARO2	orf19.1986	77.0809	106.983	65.2973	79.5325	-0.345847	0.551718	Putative chorismate synthase; fungal-specific (no human or murine homolog); protein level decreased in stationary phase yeast cultures; GlcNAc-induced protein
ARO3	orf19.1517	173.134	187.578	79.8764	67.4211	-1.29211	0.000848373	3-deoxy-D-arabinoheptulosonate-7-phosphate synthase; aromatic amino acid synthesis; GCN-regulated; feedback-inhibited by phe if expressed in S. cerevisiae; decreased in stationary phase; flow model biofilm repressed
ARO4	orf19.4060	216.288	258.254	210.156	260.612	-0.0115193	0.9888	3-deoxy-D-arabinoheptulosonate-7-phosphate synthase; aromatic amino acid biosynthesis; GCN-regulated; feedback-inhibited by tyrosine if produced in S. cerevisiae Aro3p and Aro4p catalyze same reaction; protein decreases in stationary phase
ARO7	orf19.1170	42.4711	49.4254	47.5761	35.8896	-0.138826	0.860725	Putative chorismate mutase; fungal-specific (no human or murine homolog); alkaline upregulated
ARO8	orf19.2098	358.008	345.995	128.977	73.7434	-1.79609	0.000848373	Aromatic transaminase of the Ehrlich fusel oil pathway of aromatic alcohol biosynthesis; Rim101 independent alkaline induction; protein abundance affected by URA3 expression in CAI-4 strain; Gcn4-regulated; stationary phase enriched
ARO80	orf19.3012	9.1042	10.6164	15.4738	20.9491	0.885144	0.0441044	Zn(II)2Cys6 transcription factor; transcriptional activator of aromatic amino acid catabolism; regulator of aromatic alcohol biosynthesis via the Ehrlich pathway; mutant is viable
ARO9	orf19.1237	8.7124	9.40142	19.3812	18.7447	1.07368	0.0219281	Aromatic transaminase; Ehrlich fusel oil pathway of aromatic alcohol biosynthesis; Rim101-dependent pH-regulation (alkaline induced); Hap43-induced gene
ARP1	orf19.2641	8.38871	8.63842	5.12875	3.47982	-0.983989	0.142738	Putative centractin; induced upon adherence to polystyrene
ARP2	orf19.7292	154.918	172.555	100.175	65.3184	-0.984603	0.0209768	Component of the Arp2/3 complex; required for virulence, hyphal growth, cell wall/cytoskeleton organization, not for endocytosis; mutation confers hypersensitivity to cytochalasin D; regulated by Gcn2 and Gcn4; Spider biofilm repressed
ARP3	orf19.2289	107.057	109.318	70.0113	45.8588	-0.901025	0.0373369	Protein with Myo5p-dependent localization to cortical actin patches at hyphal tip; mutation confers hypersensitivity to cytochalasin D; Spider biofilm repressed
ARP4	orf19.5623	25.7987	31.9862	35.5795	48.7334	0.545061	0.266639	Subunit of the NuA4 histone acetyltransferase complex
ARP8	orf19.3359	58.6259	55.5754	42.6612	41.6336	-0.438064	0.405363	Putative chromatin-remodeling enzyme complex protein; mutation confers hypersensitivity to toxic ergosterol analog, and to amphotericin B; rat catheter biofilm induced
ARP9	orf19.2507	24.9974	19.9765	26.7637	27.5846	0.273149	0.658693	Protein similar to S. cerevisiae Arp3p, a component of the Arp2/3 complex involved in actin-dependent processes; likely to be essential for growth, based on an insertional mutagenesis strategy
ARR3	orf19.3122	49.3517	50.3584	80.5922	70.0837	0.595638	0.204032	Ortholog of S. cerevisiae Arr3; arsenite transporter of the plasma membrane required for resistance to arsenic compounds; benomyl-induced; Gcn4-regulated; Hap43-repressed; mutant is viable; Spider biofilm induced
ARV1	orf19.5931	7.55851	5.17529	3.95185	4.57938	-0.577836	0.841678	Lipid transporter involved in sterol trafficking and transport of glycosylphosphatidylinositol and sphingolipid precursors
ARX1	orf19.3015	170.636	154.212	196.211	341.919	0.728188	0.141903	Putative ribosomal large subunit biogenesis protein; repressed in core stress response; repressed by prostaglandins
ASC1	orf19.6906	1741.1	1876.68	1439.97	1703.54	-0.202727	0.782165	40S ribosomal subunit similar to G-beta subunits; glucose or N starvation induced filamentation; required for virulence in mice; snoRNA snR24 encoded in ASC1 intron; repressed in stationary phase; GlcNAc-induced; Spider biofilm repressed
ASE1	orf19.7377	8.29803	9.92823	5.50034	5.33987	-0.749627	0.137887	Putative microtubule-associated protein; member of conserved Mcm1p regulon; periodic mRNA expression, peak at cell-cycle G2/M phase
ASF1	orf19.3715	29.9425	27.1124	13.2401	10.4167	-1.2701	0.021293	Protein similar to S. cerevisiae Asf1p, a chromatin assembly complex component; likely to be essential for growth, based on an insertional mutagenesis strategy
ASG1	orf19.166	26.9751	27.4138	22.6132	40.3801	0.211887	0.753815	Gal4p family zinc-finger transcription factor with similarity to S. cerevisiae Asg1p
ASG7	orf19.5520	24.7766	66.7231	2.98029	7.84896	-3.07883	0.00592979	a-cell specific protein of unknown function; two predicted transmembrane domains; member of conserved Mcm1 regulon; induced by alpha pheromone in SpiderM medium
ASH1	orf19.5343	79.7014	78.8336	72.0139	43.6711	-0.4546	0.385652	GATA-like transcription factor; localizes to daughter cell, hyphal tip cell nuclei; mRNA localization mediated by She3; required for WT virulence and filamentous growth on solid media; Ras1 repressed in yeast, Cyr1 repressed yeast, hyphae
ASH2	orf19.3964	53.532	42.2796	34.4726	35.6781	-0.449743	0.437285	Ortholog(s) have histone methyltransferase activity (H3-K4 specific) activity
ASK1	orf19.4675	18.2119	18.5181	12.9923	11.6368	-0.576593	0.250726	Essential subunit of the Dam1 (DASH) complex, which acts in chromosome segregation by coupling kinetochores to spindle microtubules
ASM3	orf19.6037	18.0691	18.897	12.7248	9.97921	-0.703258	0.143765	Putative secreted acid sphingomyelin phosphodiesterase; possible Kex2 substrate; transcript increased in an azole-resistant strain that overexpresses MDR1; flow model biofilm induced; F-12/CO2 early biofilm induced
ASN1	orf19.198	233.599	255.893	138.952	140.853	-0.806863	0.099904	Putative asparagine synthetase; soluble protein in hyphae; regulated by Rim101; decreased expression at pH 4 vs pH 8; protein detected during exponential and stationary phases of yeast-form growth
ASR1	orf19.2344	43.4188	37.8148	95.0461	36.1734	0.691834	0.167657	Heat shock protein; transcript regulated by cAMP, osmotic stress, ciclopirox olamine, ketoconazole; repressed by Cyr1, Ras1; colony morphology-related regulated by Ssn6; stationary phase enriched; Hap43-induced; Spider biofilm induced
ASR2	orf19.7284	220.592	207.507	166.628	88.0169	-0.749457	0.101922	Adenylyl cyclase and stress responsive protein; induced in cyr1 or ras1 mutant; stationary phase enriched protein; Spider biofilm induced
ASR3	orf19.842	1165.59	1079.99	1363.35	915.366	0.021138	0.981499	Adenylyl cyclase and stress responsive protein; induced in cyr1 or ras1 mutant; Spider biofilm induced
ATC1	orf19.6214	25.2885	31.5085	30.1916	23.5711	-0.0792083	0.92299	Cell wall acid trehalase; catalyzes hydrolysis of the disaccharide trehalose; similar to S. cerevisiae vacuolar acid trehalase (Ath1p); Hap43p-repressed gene
ATF1	orf19.5877	55.6249	53.6346	63.5205	79.5511	0.388979	0.471288	Putative alcohol acetyltransferase; caspofungin repressed; expression depends on Tac1p
ATG1	orf19.3841	47.4877	50.8933	59.1052	55.0146	0.214097	0.744216	Putative protein serine/threonine kinase; predicted role in vesicle formation in autophagy and the cytoplasm-to-vacuole targeting (Cvt) pathway; Spider biofilm induced
ATG15	orf19.3412	70.5056	58.3963	91.5129	80.5766	0.416886	0.452464	Putative lipase; fungal-specific (no human or murine homolog); Hap43p-repressed gene
ATG9	orf19.5974	26.6668	26.0311	17.3133	20.8955	-0.463843	0.38109	Protein similar to S. cerevisiae Atg9; required for early step in autophagy; required for cytoplasm to vacuole trafficking of Lap41; Spider biofilm induced
ATM1	orf19.1077	20.9052	27.7089	26.3644	24.0983	0.0538433	0.949686	Member of MDR subfamily of ABC family; ortholog of S. cerevisiae ABC transporter, Atm1; induced in low iron; induced by nitric oxide independent of Yhb1
ATO1	orf19.6169	43.3134	34.3299	7.77019	14.445	-1.80531	0.000848373	Putative fungal-specific transmembrane protein; induced by Rgt1; Spider biofilm induced
ATO10	orf19.3263	0.00369789	2.76519e-31	2.56116e-74	3.00591e-83	-236.387	1	Putative fungal-specific transmembrane protein; rat catheter and Spider biofilm induced
ATO2	orf19.2496	32.187	48.4139	90.0428	224.7	1.96531	0.000848373	Putative fungal-specific transmembrane protein; fluconazole repressed, Hap43-repressed; flow model biofilm induced; Spider biofilm induced
ATO5	orf19.6997	4.06319	7.52792	4.67364	1.79034	-0.842525	0.393939	Putative fungal-specific transmembrane protein
ATO6	orf19.6995	15.6253	10.4247	31.1529	37.1245	1.39012	0.00732107	Putative fungal-specific transmembrane protein
ATO7	orf19.1571	6.31884	7.40511	0	0	#N/A	0.000848373	Putative fungal-specific transmembrane protein
ATO9	orf19.3261	0	3.98932e-155	4.50223e-146	3.24674e-140	49.5318	1	Putative fungal-specific transmembrane protein
ATP1	orf19.6854	2468.99	2631.36	1230.33	783.104	-1.34094	0.00392336	ATP synthase alpha subunit; antigenic in human/mouse; at hyphal surface; ciclopirox, ketoconazole, flucytosine induced; Efg1, caspofungin repressed; may be essential; sumoylation target; stationary phase-enriched; Spider biofilm repressed
ATP14	orf19.5491.1	2052.86	2126.07	1125.45	884.998	-1.05561	0.0159955	Putative mitochondrial F1F0 ATP synthase subunit; macrophage/pseudohyphal-induced
ATP16	orf19.7678	2123.98	2169.84	1817.46	1326.22	-0.449803	0.451265	Subunit of the mitochondrial F1F0 ATP synthase; sumoylation target; protein newly produced during adaptation to the serum; Spider biofilm repressed
ATP17	orf19.7509.1	1420.97	1469.42	943.677	602.655	-0.902413	0.0339851	Mitochondrial ATPase complex subunit; downregulated by Efg1p; flucytosine induced; caspofungin repressed
ATP18	orf19.2066.1	1025.75	1232.33	591.701	302.332	-1.3367	0.00592979	F1F0 ATP synthase complex subunit; gene has intron
ATP19	orf19.5231.2	1734.56	1882.78	704.352	878.935	-1.19201	0.00495977	Subunit k of the mitochondrial F1F0 ATP synthase; a large enzyme complex required for ATP synthesis; Spider biofilm repressed
ATP2	orf19.5653	3484.64	3609.36	1847.21	1220.12	-1.20962	0.00986577	F1 beta subunit of F1F0 ATPase complex; antigenic in human, mice; induced by ciclopirox olamine; caspofungin repressed; macrophage/pseudohyphal-induced; detected during exponential and stationary growth phases; Spider biofilm repressed
ATP20	orf19.3757	544.109	639.145	319.626	307.81	-0.915219	0.02593	Putative mitochondrial ATP synthase; shows colony morphology-related gene regulation by Ssn6p; flucytosine induced; caspofungin repressed; macrophage/pseudohyphal-induced
ATP3	orf19.3223	947.594	1001.18	467.903	396.457	-1.17286	0.0102931	F1-ATP synthase complex subunit; caspofungin repressed; flucytosine and macrophage/pseudohyphal-induced; present in exponential and stationary growth phases; Hap43p-induced gene
ATP4	orf19.3579	917.408	1050.19	587.182	476.704	-0.887094	0.053933	Putative F0-ATP synthase subunit 4; macrophage/pseudohyphal-induced; present in exponential and stationary growth phases
ATP5	orf19.5419	1137.24	1400.25	688.209	546.048	-1.03976	0.021293	Putative F0-ATP synthase FO subunit B; caspofungin repressed; protein level decreased in stationary phase yeast cultures; Spider biofilm repressed
ATP6	CaalfMp06	2.85713	13.2424	1.51679	2.6631	-1.94548	0.084025	Subunit 6 of the F0 sector of mitochondrial F1F0 ATP synthase, which is a large, evolutionarily conserved enzyme complex required for ATP synthesis
ATP7	orf19.2785	672.934	625.923	255.192	307.151	-1.20772	0.00495977	Putative subunit of the F1F0-ATPase complex; colony morphology-related gene regulation by Ssn6; farnesol, macrophage-downregulated protein abundance; protein present in exponential and stationary yeast growth phases; Hap43-induced
ATP8	CaalfMp07	39.7579	0	10.1625	53.5281	0.679838	0.874773	Subunit 8 of the F0 sector of mitochondrial F1F0 ATP synthase, which is a large, evolutionarily conserved enzyme complex required for ATP synthesis
ATP9	CaalfMp05	0	0	0	0	0	1	Subunit 9 of the F0 sector of mitochondrial F1F0 ATP synthase, which is a large, evolutionarily conserved enzyme complex required for ATP synthesis
ATS1	orf19.6399	59.0921	45.6282	42.5945	45.6895	-0.246318	0.693214	Protein required for modification of wobble nucleosides in tRNA; induced upon adherence to polystyrene; regulated by Sef1, Sfu1, and Hap43
ATX1	orf19.2369.1	307.77	272.708	140.737	200.72	-0.765534	0.204392	Putative cytosolic copper metallochaperone; flucytosine induced; Ssr1-repressed; rat catheter biofilm induced
AUR1	orf19.1945	516.231	358.897	838.755	906.081	0.995524	0.0373369	Inositolphosphorylceramide (IPC) synthase; catalyzes the key step in sphingolipid biosynthesis; antifungal drug target; flow model biofilm induced; Spider biofilm induced
AUT7	orf19.2480.1	234.083	272.894	547.926	321.663	0.778414	0.154985	Putative autophagosome protein; acts synergistically with Ysy6p to regulate unfolded protein response and mitochondrial function under ER stress; macrophage/pseudohyphal-repressed; alternatively spliced intron in 5' UTR
AVT1	orf19.5496	20.1718	22.3423	23.7825	27.2263	0.262802	0.668212	Putative vacuolar transporter; promoter bound by a1p and alpha2p by ChIP-chip analysis
AVT4	orf19.1142	12.8593	13.0396	11.6538	12.5544	-0.0973999	0.908977	Putative vacuolar transporter of large neutral amino acids; induced by alpha pheromone in SpiderM medium
AVT7	orf19.905	25.4154	40.8352	40.6766	29.8166	0.089551	0.910032	Ortholog of S. cerevisiae Avt7 transporter; repressed upon adherence to polystyrene; constitutive expression independent of MTL or white-opaque status; Spider biofilm induced
AXL1	orf19.7342	21.2814	23.3239	40.9483	54.7198	1.10082	0.738017	Putative endoprotease; induced by alpha factor; transcript is upregulated in an RHE model of oral candidiasis and in clinical isolates from HIV+ patients with oral candidiasis
AXL2	orf19.5292	49.6893	57.1084	49.6662	32.4712	-0.378769	0.51331	Ortholog of S. cerevisiae Axl2; a plasma membrane protein involved in determination of budding pattern; O-glycosylated by Pmt4; mutant is viable
AYR1	orf19.6167	68.9297	64.1619	42.4458	38.9494	-0.709404	0.119361	Putative oxidoreductase; transcriptionally induced by interaction with macrophage; rat catheter biofilm repressed
AYR2	orf19.5615	148.631	95.0234	106.236	119.513	-0.110116	0.886913	Putative NADPH-dependent 1-acyl dihydroxyacetone phosphate reductase; shows colony morphology-related gene regulation by Ssn6p
BAS1	orf19.3809	52.2305	46.4361	91.8356	133.87	1.19381	0.00862192	Putative Myb-like transcription factor; ortholog S. cerevisiae Bas1, a regulator of purine biosynthetic genes; mutant exhibits adenine auxotrophy and abnormal colony morphology
BAT21	orf19.797	44.7664	62.4401	40.6199	42.4012	-0.368843	0.499105	Putative branched chain amino acid aminotransferase; regulated by Gcn4, Gcn2; induced in response to amino acid starvation (3-aminotriazole treatment); early-stage flow model biofilm formation
BAT22	orf19.6994	233.417	238.796	126.651	145.731	-0.793801	0.0878435	Putative branched chain amino acid aminotransferase; regulated by Gcn4p; induced by farnesol treatment, GlcNAc, amino acid starvation (3-aminotriazole treatment); present in exponential and stationary growth phase yeast cultures
BBC1	orf19.2791	77.1593	82.1216	88.0374	59.2494	-0.112945	0.889466	Putative SH3-domain-containing protein
BCK1	orf19.5162	16.4935	18.8458	19.2966	18.7799	0.107633	0.883213	Ortholog of S. cerevisiae Bck1; MAP kinase kinase kinase of cell integrity pathway; mutant is hypersensitive to caspofungin
BCR1	orf19.723	233.199	176.44	205.848	389.509	0.5394	0.343567	Transcription factor; regulates a/alpha biofilm formation, matrix, cell-surface-associated genes; confers adherence, impermeability, impenetrability, fluconazole resistance; Tup1/Tec1/Mnl1-regulated; mRNA binds She3; Spider biofilm induced
BCY1	orf19.2014	168.18	179.874	148.433	116.647	-0.392891	0.49471	Protein kinase A regulatory subunit; involved in regulation of filamentation, phenotypic switching and mating; required for nuclear localization of Tpk1; physically interacts with Tpk1; apoptosis-regulated
BDF1	orf19.978	193.607	167.968	220.204	208.366	0.245234	0.724154	Essential chromatin-binding bromodomain protein; repressed upon adherence to polystyrene; reduced mRNA abundance detected in null mutant; macrophage/pseudohyphal-repressed
BEM1	orf19.4645	67.3212	88.2749	157.7	112.759	0.797602	0.0880463	Protein required for wild-type budding, hyphal growth, and virulence in a mouse systemic infection; suppresses pseudohyphal and filamentous growth defects of various S. cerevisiae mutants and heat sensitivity of S. cerevisiae cdc24-4 mutant
BEM2	orf19.6573	30.0979	33.4959	41.0384	54.3561	0.585022	0.263675	Putative Rho1p GTPase activating protein (GAP); serum-induced transcript; Spider biofilm induced; flow model biofilm repressed
BEM3	orf19.2771	10.0882	13.8832	12.9767	18.4374	0.3901	0.726642	Putative GTPase-activating protein (GAP) for Rho-type GTPase Cdc42p; involved in cell signaling pathways that control cell polarity; similar to S. cerevisiae Bem3p
BET2	orf19.7563	26.8471	36.001	21.798	23.0791	-0.485889	0.373248	Putative Type II geranylgeranyltransferase beta subunit; transcript regulated by Mig1
BET4	orf19.1039	7.57988	9.37976	11.5247	9.07909	0.280802	0.747303	Ortholog(s) have Rab geranylgeranyltransferase activity, role in ER to Golgi vesicle-mediated transport, protein geranylgeranylation, protein targeting to membrane and Rab-protein geranylgeranyltransferase complex, peroxisome localization
BFA1	orf19.6080	63.1992	59.1857	32.7541	49.9968	-0.564579	0.255538	Ortholog(s) have GDP-dissociation inhibitor activity, GTPase activator activity, role in mitotic spindle orientation checkpoint and Bfa1-Bub2 complex localization
BFR1	orf19.4560	551.297	545.848	411.447	459.181	-0.333628	0.594649	Protein involved in the maintenance of normal ploidy; S. cerevisiae ortholog cofers Brefeldin A resistance; stationary phase enriched protein; Spider biofilm repressed
BGL2	orf19.4565	866.421	858.113	587.54	487.217	-0.682197	0.175078	Cell wall 1,3-beta-glucosyltransferase; mutant has cell-wall and growth defects, but wild-type 1,3- or 1,6-beta-glucan content; antigenic; virulence role in mouse systemic infection; rat catheter biofilm induced
BGL22	orf19.7339	11.0611	11.4684	20.7649	13.6439	0.610962	0.905801	Putative glucanase; induced during cell wall regeneration
BIG1	orf19.2334	17.1236	20.3671	10.5283	9.09711	-0.933811	0.0989164	Endoplasmic reticulum (ER) protein; ortholog of S. cerevisiae Big1; required for beta-1,6-glucan synthesis, filamentation, adhesion, and virulence; rat catheter biofilm repressed
BIO2	orf19.2593	11.9164	10.8995	9.92382	9.10864	-0.261573	0.760489	Putative biotin synthase; induced by high iron; repressed by ciclopirox olamine; upregulated in clinical isolates from HIV+ patients with oral candidiasis; Hap43-repressed; Spider biofilm induced
BIO32	orf19.3567	8.07363	6.65476	22.3166	15.3949	1.3564	0.0090511	Putative class III aminotransferase with a predicted role in biotin biosynthesis; Spider biofilm induced
BLM3	orf19.2182	67.2137	72.628	121.45	107.296	0.709954	0.168618	Putative proteasome activator; binds core proteasome and stimulates proteasome-mediated protein degradation by inducing gate opening; ortholog of S. cerevisiae Blm10; transcript regulated by Nrg1 and Mig1
BLP1	orf19.4914.1	11159.6	7922.09	11325	11840.1	0.279756	0.682686	Protein of unknown function, serum-induced
BMH1	orf19.3014	1782.47	1864.64	1187.68	839.483	-0.847293	0.0884968	Sole 14-3-3 protein in C. albicans; role in hyphal growth; possibly regulated by host interaction; localizes to yeast-form cell surface, not hyphae; alternatively spliced 5' UTR intron; Spider biofilm repressed
BMS1	orf19.2504	118.791	100.257	125.264	215.8	0.638796	0.242023	Putative GTPase; Hap43-induced gene; mutation confers resistance to 5-fluorocytosine (5-FC); flucytosine induced; repressed by prostaglandins; Spider biofilm induced
BMT1	orf19.6782	55.3357	68.2943	32.7534	53.6616	-0.516676	0.305749	Beta-mannosyltransferase, required for addition of the 1st beta-mannose residue to acid-stable fraction of cell wall phosphopeptidomannan; 9-gene family member; mutants induce higher levels of inflammatory cytokines in mouse dendritic cells
BMT3	orf19.3282	50.3521	61.9705	56.2585	49.7724	-0.0831634	0.916876	Beta-mannosyltransferase; adds 2nd beta-mannose to the acid-stable fraction of cell wall phosphopeptidomannan, elongation of beta-mannose chains on the phosphopeptidomannan acid-labile fraction; Hap43-induced; Spider biofilm induced
BMT4	orf19.5612	24.5156	32.1014	26.8619	27.9016	-0.0480201	0.955771	Beta-mannosyltransferase; for elongation of beta-mannose chains on the acid-labile fraction of cell wall phosphopeptidomannan; 9-gene family member; regulated by Tsa1, Tsa1B; flow model biofilm induced; rat catheter biofilm repressed
BMT5	orf19.1464	51.4598	44.9579	57.0602	59.527	0.274039	0.646335	Putative beta-mannosyltransferase involved in beta-1,2-mannosylation of phospholipomannan; 9-member family includes Bmt1, Bmt2, Bmt3, and Bmtp with roles in mannosylation of cell wall phosphopeptidomannan; Spider biofilm induced
BMT6	orf19.5602	34.2393	35.6962	68.3478	77.8181	1.06351	0.00862192	Beta-mannosyltransferase; beta-1,2-mannosylation of phospholipomannan; member of a 9-member family including Bmt1, Bmt2, Bmt3, and Bmt4 with roles in mannosylation of cell wall phosphopeptidomannan; flow model biofilm induced
BMT7	orf19.342	8.48654	13.7862	8.36703	7.88928	-0.454278	0.449201	Beta-mannosyltransferase, member of a 9-gene family that includes characterized genes BMT1, BMT2, BMT3, and BMT4 with roles in beta-1,2-mannosylation of cell wall phosphopeptidomannan; downregulated in azole-resistant strain; Hap43p-induced
BMT8	orf19.860	7.71629	7.94898	9.42878	11.149	0.393517	0.538786	Putative beta-mannosyltransferase, member of a 9-gene family including characterized BMT genes with roles in beta-1,2-mannosylation of cell wall phosphopeptidomannan; transposon insertion in promoter region causes decreased colony wrinkling
BMT9	orf19.4673	12.5428	6.53188	13.4148	10.3989	0.320129	0.608751	Beta-mannosyltransferase, 9-gene family that includes characterized genes BMT1, BMT2, BMT3, and BMT4 with roles in beta-1,2-mannosylation of cell wall phosphopeptidomannan; regulated by Sef1, Sfu1, Hap43; rat catheter biofilm repressed
BNA4	orf19.5443	173.522	172.75	143.839	103.088	-0.48782	0.359816	Putative kynurenine 3-monooxygenase, involved in NAD biosynthesis; transposon mutation affects filamentous growth; Hap43p-repressed gene; oral infection upregulated; mutants have reduced capacity to damage oral epithelial cells
BNI1	orf19.4927	67.4679	75.0623	69.3981	60.7224	-0.131419	0.873237	Formin; role in cytoskeletal organization, cell polarity; role in systemic virulence in mouse; cell-cycle regulated localization to site of polarized growth, bud neck; localizes to Spitzenkorper of hyphae, minor localization at septum
BNI4	orf19.4457	30.7132	36.3004	30.2563	39.5367	0.0586274	0.946433	Protein required for wild-type cell wall chitin distribution, morphology, hyphal growth; not essential; similar to S. cerevisiae Bni4p (targeting subunit for Glc7p phosphatase, involved in bud-neck localization of chitin synthase III)
BNR1	orf19.7537	21.4694	25.8563	27.9705	20.9284	0.0471776	0.95716	Formin; probable role in hyphal cytoskeletal polarity; synthetic lethality if Bnr1p and Bni1p are absent
BOI2	orf19.3230	40.3298	49.1086	59.0131	75.5956	0.589806	0.241436	Putative SH3-domain-containing protein; mutation confers hypersensitivity to toxic ergosterol analog; Spider biofilm induced
BPH1	orf19.6261	10.8583	11.4698	15.2446	17.9894	0.573803	0.240679	Ortholog of S. cerevisiae Bph1; a putative ortholog of human Chediak-Higashi syndrome protein and murine beige gene implicated in disease syndromes involving defective lysosomal trafficking; mutant is viable
BRE1	orf19.976	162.847	118.524	165.108	234.843	0.507351	0.362464	Putative transcription factor with C3HC4 zinc finger DNA-binding motif; similar to S. cerevisiae Bre1p; transposon mutation affects filamentous growth
BRF1	orf19.6649	62.9683	55.3646	52.6922	68.3886	0.0331191	0.969801	Component of the general transcription factor for RNA polymerase III (TFIIIB); possibly an essential gene, disruptants not obtained by UAU1 method
BRG1	orf19.4056	916.366	719.484	907.127	1233.36	0.387901	0.539734	Transcription factor; recruits Hda1 to hypha-specific promoters; Tn mutation affects filamentation; Hap43-repressed; Spider and flow model biofilm induced; required for Spider biofilm formation; Bcr1-repressed in RPMI a/a biofilms
BRN1	orf19.1251	21.962	18.3789	15.3262	21.6367	-0.126167	0.871286	Putative condensin complex subunit; cell-cycle regulated periodic mRNA expression
BRO1	orf19.1670	19.7564	23.1027	29.4405	21.8944	0.260339	0.679507	Class E vacuolar protein sorting factor; role in transport from multivesicular body to vacuole; not involved in Rim101 pathway; macrophage and pseudohyphal-repressed; flow model biofilm induced
BST1	orf19.1053	79.7693	66.1496	46.1336	72.604	-0.29739	0.612414	Inositol deacylase involved in attachment of GPI-anchored proteins to cell wall; required for host invasion and immune escape
BTA1	orf19.1171	271.261	446.373	106.383	56.5446	-2.13902	0.000848373	Ortholog of C. dubliniensis CD36 : Cd36_10780, C. parapsilosis CDC317 : CPAR2_208080, Candida tenuis NRRL Y-1498 : CANTEDRAFT_120956 and Debaryomyces hansenii CBS767 : DEHA2F24508g
BTS1	orf19.6674	9.64886	9.73345	23.1076	17.7474	1.07577	0.274776	Putative geranylgeranyl diphosphate synthase; repressed by benomyl treatment; Spider biofilm induced
BUB1	orf19.2678	14.213	15.8573	15.8957	9.72677	-0.230931	0.725566	Putative cell cycle checkpoint kinase; mutation confers increased sensitivity to nocodazole
BUB2	orf19.5827	7.80391	13.2653	7.57189	5.27485	-0.713733	0.334312	Ortholog(s) have GTPase activator activity
BUB3	orf19.2655	129.066	125.753	214.996	141.853	0.485838	0.358774	Protein similar to S. cerevisiae Bub3; a kinetochore checkpoint component; induced by hydroxyurea treatment; flow model biofilm induced; Spider biofilm induced
BUD14	orf19.3555	105.928	77.266	124.105	137.501	0.514026	0.327114	Putative SH3-domain-containing protein; predicted role in bud-site selection; Spider biofilm induced
BUD16	orf19.1828	7.53268	11.6186	15.1894	23.8892	1.02893	0.0641309	Putative pyridoxal kinase; a key enzyme in pyridoxal 5'-phosphate synthesis, the active form of vitamin B6; involved in bud-site selection and genome integrity in S. cerevisiae; induced by alpha pheromone in SpiderM medium
BUD2	orf19.940	15.3298	18.5878	33.3324	27.9174	0.852669	0.0509578	GTPase activating protein (GAP) for Rsr1; negative regulator of filament branching, acts in hyphal growth guidance; required for wild-type budding pattern; induced in low iron; regulated by tyrosol and cell density
BUD20	orf19.218	0.849303	0	0	0.686077	-0.30791	1	Protein similar to S. cerevisiae Bud20p, which affects bud site selection; transposon mutation affects filamentous growth
BUD21	orf19.5430	233.464	179.346	186.37	275.365	0.161585	0.828047	Small-subunit processome component; repressed by prostaglandins
BUD22	orf19.3287	83.8895	76.4666	57.0954	118.754	0.133062	0.862538	Protein with a predicted role in 18S rRNA maturation and small ribosomal subunit biogenesis; repressed in core stress response; repressed by prostaglandins
BUD23	orf19.1966	86.3925	63.0517	69.5011	131.944	0.430784	0.434542	Putative methyltransferase; Hap43-induced; repressed by prostaglandins
BUD31	orf19.4855	31.765	26.886	44.3537	50.5543	0.694373	0.274969	Bud31 ortholog; not subject to mating-type regulation, in contrast to S. cerevisiae Bud31 which has a role in specifying the bud site; Spider biofilm induced
BUD5	orf19.1842	73.6797	69.0026	60.2418	107.361	0.232236	0.746196	Predicted GTP/GDP exchange factor for Rsr1; rat catheter biofilm induced
BUD6	orf19.5087	27.769	27.6195	30.115	21.1831	-0.110681	0.891101	Protein required for Spitzenkorper formation in hyphal cells (wild-type localization of Mlc1p to the Spitzenkorper); localizes to polarisome
BUD7	orf19.1112	39.2211	43.6038	36.9131	38.339	-0.138332	0.850325	Ortholog(s) have small GTPase binding activity, role in Golgi to plasma membrane protein transport, Golgi to vacuole transport, fungal-type cell wall chitin biosynthetic process and exomer complex localization
BUL1	orf19.5094	23.402	19.5984	15.1707	10.4658	-0.746154	0.100041	Protein similar but not orthologous to S. cerevisiae Bul1; a protein involved in selection of substrates for ubiquitination; mutants are viable; macrophage/pseudohyphal-induced; rat catheter biofilm induced
BUL4	orf19.5245	6.66578	9.7908	14.5516	13.0979	0.74859	0.141412	Protein with a predicted BUL1 N-terminal and C-terminal domains; Bul1 binds the ubiquitin ligase Rsp5 in S. cerevisiae; Hap43-repressed gene; rat catheter biofilm induced
BUR2	orf19.4284	25.9663	27.4884	26.4174	27.5525	0.0138382	0.986729	Protein with similarity to S. cerevisiae Bur2p, contains a cyclin domain; not required for wild-type hyphal growth, adherence to buccal epithelial cells, or virulence in mouse systemic infection
BZZ1	orf19.1699	33.0041	37.1225	24.4356	17.64	-0.736977	0.0897375	Protein similar to S. cerevisiae Bzz1p, which is an SH3 domain protein involved in the regulation of actin polymerization
C1_00010W_A	orf19.6115	6.93851	2.30553	0	0.700626	-3.72181	0.355825	Dubious open reading frame
C1_00020C_A	orf19.6114	205.87	184.308	384.442	266.259	0.737862	0.472608	Protein of unknown function; transcript detected on high-resolution tiling arrays
C1_00030C_A	orf19.6113	3.20006	0.945167	0.817961	0.86168	-1.3033	0.771604	Protein of unknown function; transcript detected on high-resolution tiling arrays
C1_00050C_A	orf19.6110	0.815282	0	0	0	#N/A	1	Ortholog of Candida albicans WO-1 : CAWG_01361
C1_00090W_A	orf19.6103	27.9592	17.5424	40.6787	31.4847	0.665349	0.903071	Ortholog(s) have role in ascospore wall assembly, ascospore-type prospore membrane assembly and cytosol, prospore membrane localization
C1_00100C_A	orf19.6100	70.8133	69.5187	77.2286	74.8189	0.115678	0.883111	Cardiolipin synthase; ortholog of S. cerevisiae Crd1; transcript is upregulated in clinical isolates from HIV+ patients with oral candidiasis; mutants are viable; Spider biofilm repressed
C1_00160C_A	orf19.6090	780.704	655.131	562.974	988.79	0.112019	0.90082	Putative nucleolar protein with a predicted role in pre-rRNA processing and ribosome biogenesis; repressed by nitric oxide; required for flow model biofilm formation; Spider biofilm repressed
C1_00190C_A	orf19.6084	34.73	48.0836	188.503	118.139	1.88862	0.000848373	Protein of unknown function; flow model biofilm induced; Spider biofilm induced
C1_00200C_A	orf19.6083	58.7003	68.6284	77.5221	80.3484	0.310185	0.692867	Has domain(s) with predicted nucleic acid binding, nucleotide binding activity
C1_00210C_A	orf19.6082	287.394	296.436	183.27	221.935	-0.526895	0.316118	Ortholog(s) have unfolded protein binding activity, role in protein folding, protein localization to cell surface and integral component of endoplasmic reticulum membrane localization
C1_00270W_A	orf19.6079	96.6506	108.177	89.7171	82.5956	-0.249381	0.920216	Predicted ORF in retrotransposon Tca8 with similarity to the Gag region encoding nucleocapsid-like protein; repressed by ciclopirox olamine; filament induced; regulated by Rfg1, Tup1; overlaps orf19.6078.1
C1_00310W_A	orf19.6077	78.0599	83.0779	74.572	57.0689	-0.291687	0.630297	Putative protein of unknown function; shows colony morphology-related gene regulation by Ssn6p
C1_00320W_A	orf19.6076	32.648	37.7331	42.6067	26.701	-0.0221724	0.98422	Ortholog(s) have protein transporter activity, role in intracellular protein transport, retrograde transport, endosome to Golgi and endosome, retromer, cargo-selective complex localization
C1_00330C_A	orf19.6075	75.6116	69.7262	45.6501	42.8388	-0.715842	0.346167	Putative CCR4-Not complex transcription factor; ortholog of S. cerevisiae Cdc36; Hap43-repressed gene
C1_00370W_A	orf19.6072.1	130.824	144.901	179.739	124.396	0.141479	0.96759	Protein of unknown function
C1_00380C_A	orf19.6071	69.2117	61.1728	59.7463	89.559	0.195494	0.799339	Ortholog(s) have peptide alpha-N-acetyltransferase activity and role in N-terminal peptidyl-methionine acetylation, cytoskeleton organization, mitochondrion inheritance, regulation of actin cytoskeleton organization
C1_00410C_A	orf19.6066	195.847	190.192	365.577	227.243	0.618845	0.241119	Hexadecenal dehydrogenase; involved in the conversion of sphingosine 1-phosphate breakdown product hexadecenal to hexadecenoic acid; Spider biofilm induced
C1_00420W_A	orf19.6065	60.6971	67.1259	92.8524	54.8659	0.208702	0.753981	RNA polymerase II holoenzyme/mediator subunit; regulated by Mig1, Tup1; amphotericin B, caspofungin repressed; protein present in exponential and stationary growth phase yeast; Hap43-repressed; Spider biofilm repressed
C1_00430W_A	orf19.6064	49.9097	46.4245	54.8586	51.5781	0.143875	0.844731	Ortholog(s) have phosphatidylinositol-3,5-bisphosphate binding, phosphatidylinositol-3-phosphate binding, phosphatidylinositol-4-phosphate binding, ubiquitin binding activity
C1_00450C_A	orf19.6062.3	274.507	254.997	149.421	163.918	-0.756914	0.0823783	Mitochondrial protein; component of the mitochondrial inner membrane organizing system ; role in maintenance of crista junctions and inner membrane architecture; Spider biofilm repressed
C1_00460W_A	orf19.6062	528.627	465.769	503.473	557.624	0.0936641	0.902906	Putative TIM23 translocase complex subunit; membrane-localized; Hap43-repressed
C1_00470C_A	orf19.6061	24.5061	23.7646	21.6953	25.1489	-0.0432748	0.961634	Ortholog(s) have role in N-acylethanolamine metabolic process, N-acylphosphatidylethanolamine metabolic process and integral component of mitochondrial inner membrane localization
C1_00510W_A	orf19.6057	27.1466	26.5027	48.8632	47.4041	0.843487	0.0600386	Ortholog(s) have 3-methyl-2-oxobutanoate hydroxymethyltransferase activity, role in pantothenate biosynthetic process, respiratory chain complex IV assembly and mitochondrion localization
C1_00520W_A	orf19.6056	41.8801	42.0569	87.7801	68.8926	0.900375	0.0474527	Ortholog(s) have phosphatase activity and role in dephosphorylation
C1_00530C_A	orf19.6055	28.1031	24.3409	31.5368	29.9428	0.229329	0.726026	Ortholog of C. dubliniensis CD36 : Cd36_00460, C. parapsilosis CDC317 : CPAR2_800010, Candida tenuis NRRL Y-1498 : CANTEDRAFT_125085 and Debaryomyces hansenii CBS767 : DEHA2D09086g
C1_00540C_A	orf19.6054	66.898	65.1833	71.9753	132.725	0.632089	0.210073	Protein with a Bul1 domain; binds the ubiquitin ligase Rsp5 and is involved in intracellular trafficking of a general amino acid permease Gap1; repressed in an azole-resistant strain overexpressing MDR1; Spider biofilm induced
C1_00570C_A	orf19.6049	23.5895	24.3539	32.9834	29.0646	0.372052	0.509715	Ortholog(s) have protein kinase activator activity, role in protein phosphorylation, regulation of cytokinesis and chromosome passenger complex, kinetochore microtubule, spindle midzone localization
C1_00580W_A	orf19.6048	30.0726	35.5769	34.653	21.4041	-0.227889	0.744132	Protein of unknown function; Spider biofilm induced
C1_00630W_A	orf19.6043	30.6107	39.8038	24.8228	22.0076	-0.588427	0.217998	Ortholog(s) have mitochondrial membrane localization
C1_00660C_A	orf19.6039	37.1521	36.6635	49.493	35.1904	0.198152	0.767584	Ortholog(s) have SNAP receptor activity and role in ER to Golgi vesicle-mediated transport, Golgi organization, intra-Golgi vesicle-mediated transport, vesicle fusion with Golgi apparatus
C1_00700W_A	orf19.6035	121.411	98.5611	55.1916	119.22	-0.334828	0.621676	Protein of unknown function; repressed by nitric oxide
C1_00760W_A	orf19.6030	70.9193	83.4809	55.772	45.1624	-0.613257	0.203461	Protein of unknown function; transcript detected on high-resolution tiling arrays
C1_00790W_A	orf19.6027	9.9987	7.81047	6.35575	8.821	-0.230758	0.816575	Ortholog of C. dubliniensis CD36 : Cd36_00740, C. parapsilosis CDC317 : CPAR2_110170, Candida tenuis NRRL Y-1498 : CANTEDRAFT_133175 and Debaryomyces hansenii CBS767 : DEHA2D09724g
C1_00810W_A	orf19.6025	4.69975	5.08976	9.34341	4.64018	0.514426	0.598501	Ortholog(s) have N-acetylglucosaminyldiphosphodolichol N-acetylglucosaminyltransferase activity and role in dolichol-linked oligosaccharide biosynthetic process
C1_00820W_A	orf19.6024	3.91973	3.84532	7.08498	5.88046	0.739604	0.389718	Ortholog of C. dubliniensis CD36 : Cd36_00770, Candida tenuis NRRL Y-1498 : CANTEDRAFT_112621, Debaryomyces hansenii CBS767 : DEHA2D09812g and Pichia stipitis Pignal : PICST_61958
C1_00830W_A	orf19.6023	9.16823	8.77892	11.226	12.2441	0.387071	0.53451	Protein with a predicted multidrug transporter domain; Hap43-repressed gene
C1_00860W_A	orf19.6020	8.87315	10.6141	23.3609	23.8928	1.27789	0.0163585	Ortholog(s) have Atg8 ligase activity and role in C-terminal protein lipidation, autophagosome assembly, autophagy of mitochondrion, late nucleophagy, piecemeal microautophagy of the nucleus, protein localization by the Cvt pathway
C1_00880W_A	orf19.6017	19.2526	21.2506	7.82713	8.71474	-1.29191	0.00495977	Protein of unknown function; Spider biofilm induced
C1_00890W_A	orf19.6016	16.9094	17.7219	23.7953	20.0733	0.341108	0.549462	Putative outer mitochondrial membrane GTPase, subunit of the ERMES complex; required for mitochondrial morphology and invasive growth
C1_00910W_A	orf19.6013	19.7764	16.5814	10.2731	14.6014	-0.547598	0.443621	Has domain(s) with predicted DNA binding activity
C1_00920W_A	orf19.6012	17.604	24.7505	18.0571	16.0049	-0.314355	0.597106	Ortholog of S. cerevisiae : YOR296W, C. glabrata CBS138 : CAGL0G07579g, C. dubliniensis CD36 : Cd36_00870, C. parapsilosis CDC317 : CPAR2_110020 and Candida tenuis NRRL Y-1498 : CANTEDRAFT_93196
C1_00970W_A	orf19.6008.3	16.666	15.5878	12.0699	13.8369	-0.316135	0.778189	Ortholog of C. dubliniensis CD36 : Cd36_00920, Debaryomyces hansenii CBS767 : DEHA2F20724g, Pichia stipitis Pignal : PICST_32745 and Candida albicans WO-1 : CAWG_01277
C1_00980W_A	orf19.6008.4	213.389	206.012	130.661	79.757	-0.99507	0.0718594	Ortholog(s) have structural constituent of ribosome activity and mitochondrial large ribosomal subunit localization
C1_01000C_A	orf19.3289	18.8711	21.9026	21.2987	16.6399	-0.103974	0.907517	Phosphorylated protein of unknown function
C1_01010W_A	orf19.3290	255.992	263.263	204.438	199.65	-0.361773	0.508895	Plasma membrane-localized protein; repressed by nitric oxide; Hap43p-repressed gene
C1_01040W_A	orf19.3292	73.292	70.6086	129.755	123.18	0.813698	0.418905	Ortholog(s) have peptide-methionine (R)-S-oxide reductase activity, role in cellular response to oxidative stress and mitochondrion localization
C1_01050C_A	orf19.3293	93.9299	89.3469	70.9196	60.4426	-0.480473	0.446806	Putative enoyl reductase involved in very long chain fatty acid elongation; possibly an essential gene, disruptants not obtained by UAU1 method
C1_01070C_A	orf19.3295	29.9608	29.6305	22.0112	20.1428	-0.499431	0.326972	Has domain(s) with predicted role in cell division, chromosome segregation and MIS12/MIND type complex localization
C1_01080W_A	orf19.3296	12.5982	8.83402	10.7726	7.46798	-0.232628	0.763587	Ortholog of C. dubliniensis CD36 : Cd36_01020, C. parapsilosis CDC317 : CPAR2_110130, Candida tenuis NRRL Y-1498 : CANTEDRAFT_93515 and Debaryomyces hansenii CBS767 : DEHA2D14542g
C1_01090C_A	orf19.3297	462.717	347	317.075	400.297	-0.174695	0.800006	Ortholog(s) have structural constituent of ribosome activity and mitochondrial small ribosomal subunit localization
C1_01130W_A	orf19.3301	316.557	218.093	352.06	568.183	0.783421	0.121149	Putative ubiquitin ligase complex component; induced by heavy metal (cadmium) stress; Hog1-induced; transcript induced by Mnl1p under weak acid stress; flow model biofilm induced; Spider biofilm induced
C1_01140C_A	orf19.3302	176.165	144.588	236.963	140.401	0.234492	0.744216	Putative type-1 protein phosphatase targeting subunit; transcript repressed by yeast-hyphal switch; transcript induced by Mnl1p under weak acid stress; flow model biofilm induced
C1_01150C_A	orf19.3303	56.0924	42.9782	51.9842	73.051	0.335806	0.57007	Ortholog(s) have tRNA methyltransferase activity and role in tRNA methylation, wybutosine biosynthetic process
C1_01160C_A	orf19.3304	126.545	85.6851	74.7475	118.662	-0.133973	0.862739	Exosome non-catalytic core component; involved in 3'-5' RNA processing and degradation in the nucleus and cytoplasm; Spider biofilm induced
C1_01180C_A	orf19.3306	36.858	37.9517	24.1861	47.5447	-0.0606321	0.942803	Ortholog(s) have four-way junction DNA binding activity, role in meiotic recombination checkpoint, synaptonemal complex assembly and lateral element localization
C1_01190C_A	orf19.3307	9.03926	10.65	8.8358	8.4254	-0.189876	0.837226	Flavin-containing monooxygenase; catalyzes oxidation of biological thiols to maintain the ER redox buffer ratio for correct folding of disulfide-bonded proteins; Spider biofilm repressed
C1_01210W_A	orf19.3309	31.6499	33.9536	45.1593	39.8116	0.373198	0.501813	Ortholog of Candida tropicalis MYA-3404 : CTRG_04422 and Candida albicans WO-1 : CAWG_01254
C1_01220C_A	orf19.3310	42.7799	38.6683	49.9489	26.5698	-0.0900719	0.918524	Protein of unknown function; Hap43-repressed; rat catheter and Spider biofilm induced
C1_01250W_A	orf19.3312	51.6222	65.3894	35.5238	25.1004	-0.948686	0.0295917	Protein of unknown function; flow model and Spider biofilm repressed
C1_01290C_A	orf19.3318	9.51997	10.3549	8.87383	5.47994	-0.469514	0.418658	Ortholog(s) have lipid droplet, peroxisome localization
C1_01300W_A	orf19.3319	43.2716	59.3899	49.6565	36.6663	-0.25008	0.689254	Putative thioredoxin; Spider biofilm repressed
C1_01310W_A	orf19.3320	0	0	1.80291	5.06472	inf	0.0276514	Dubious open reading frame
C1_01340C_A	orf19.3323	7.65416	14.8262	21.7031	10.4969	0.518399	0.492641	Ortholog of C. dubliniensis CD36 : Cd36_01240, C. parapsilosis CDC317 : CPAR2_109140, Candida tenuis NRRL Y-1498 : CANTEDRAFT_114227 and Debaryomyces hansenii CBS767 : DEHA2D15026g
C1_01360C_A	orf19.3325	72.9643	66.4741	126.245	72.1228	0.508553	0.340663	Putative glycogen synthesis initiator; regulated by Efg1 and Efh1; Hog1-repressed; colony morphology-related gene regulation by Ssn6; induced by prostaglandins; flow model biofilm induced
C1_01390C_A	orf19.3328	22.5082	25.4948	42.1162	38.7772	0.7529	0.0851791	Putative transcription factor; required for inhibition of filamentous growth by farnesoic acid and for expression of PHO81; filament induced
C1_01400C_A	orf19.3329	27.0895	32.3882	25.6104	22.108	-0.317801	0.591817	Ortholog(s) have sphingosine-1-phosphate phosphatase activity, role in calcium-mediated signaling and endoplasmic reticulum localization
C1_01460W_A	orf19.3332	23.9828	20.4594	25.2381	23.1864	0.123811	0.874441	Ortholog of Bre4 in S. cerevisiae has a role in brefeldin A resistence; a drug that affect intracellular transport; Spider biofilm induced
C1_01470W_A	orf19.3333	104.068	89.6267	113.363	129.898	0.328723	0.576362	Ortholog(s) have 5S rRNA binding, 7S RNA binding, poly(A) binding, ribonuclease P RNA binding, tRNA binding activity
C1_01490W_A	orf19.3335	487.505	560.405	442.563	481.75	-0.18106	0.81052	Plasma membrane protein of unknown function; colony morphology-related gene regulation by Ssn6; repressed by nitric oxide
C1_01500W_A	orf19.3336	0.462944	0	0.354997	1.49588	1.9993	1	Ortholog of Candida albicans WO-1 : CAWG_01228
C1_01510W_A	orf19.3337	816.516	381.133	859.072	1500.25	0.978166	0.0408776	Protein of unknown function; merged with orf19.3338; rat catheter, flow and Spider model biofilm induced; promoter bound by Bcr1, Efg1, Ndt80, and Rob1; orf19.3338 Bcr1-repressed in RPMI a/a biofilms
C1_01530C_A	orf19.3341	136.643	124.405	129.509	182.176	0.255774	0.706853	Putative tRNA-Arg synthetase; essential; genes encoding ribosomal subunits, translation factors, and tRNA synthetases are downregulated upon phagocytosis by murine macrophage; downregulated by growth in the mouse cecum
C1_01540W_A	orf19.3342	30.4503	32.1872	37.7996	26.6238	0.040559	0.964182	Ortholog(s) have role in positive regulation of protein autoubiquitination, protein deubiquitination
C1_01580W_A	orf19.3348	141.141	154.488	120.686	121.013	-0.290571	0.621353	Ortholog(s) have structural constituent of ribosome activity and fungal-type vacuole, mitochondrial large ribosomal subunit localization
C1_01590C_A	orf19.3349	75.7002	84.8458	82.3434	97.2542	0.161781	0.830084	Putative RNA polymerase II subunit B150; heterozygous null mutant exhibits resistance to parnafungin in the C. albicans fitness test
C1_01610C_A	orf19.3351	5.09296	7.62502	28.2806	15.6054	1.78689	0.00219792	Protein of unknown function; Hap43-induced; Spider biofilm induced
C1_01620C_A	orf19.3352	95.8948	72.3432	60.6717	53.8417	-0.554988	0.239222	Has domain(s) with predicted oxidoreductase activity and role in metabolic process
C1_01630W_A	orf19.3353	129.335	123.752	136.511	111.232	-0.0307943	0.971308	Protein similar to a mitochondrial complex I intermediate-associated protein; fluconazole-repressed; Spider biofilm induced; rat catheter biofilm repressed
C1_01680C_A	orf19.3357	107.727	120.841	91.9814	116.03	-0.135957	0.858063	Ortholog(s) have mitochondrion localization
C1_01710W_A	orf19.3360	190.706	138.077	142.669	164.805	-0.0966738	0.911083	Protein of unknown function; flow model biofilm induced; Spider biofilm induced
C1_01750W_A	orf19.4550	7.99199	9.91415	11.9372	13.0243	0.479249	0.409904	Predicted MFS membrane transporter, member of the drug:proton antiporter (12 spanner) (DHA1) family; flow model biofilm induced
C1_01800W_A	orf19.4544	40.4845	43.9792	33.8508	30.8561	-0.384411	0.533212	Ortholog of C. dubliniensis CD36 : Cd36_01640, C. parapsilosis CDC317 : CPAR2_106830, Candida tenuis NRRL Y-1498 : cten_CGOB_00039 and Debaryomyces hansenii CBS767 : DEHA2B06578g
C1_01820C_A	orf19.4542	30.9415	25.185	23.1749	27.1263	-0.158091	0.834199	Ortholog(s) have cyclin-dependent protein kinase activating kinase regulator activity, cyclin-dependent protein serine/threonine kinase activator activity
C1_01840C_A	orf19.4539	88.4426	112.038	104.695	87.2008	-0.0631368	0.940765	Protein with a Rho GDP-dissociation inhibitor domain; Hap43-repressed gene; Spider biofilm induced
C1_01850C_A	orf19.4538	47.0565	42.3629	33.7747	42.4223	-0.230855	0.732814	Ortholog(s) have mRNA binding, protein heterodimerization activity and role in mRNA polyadenylation, pre-mRNA cleavage required for polyadenylation, response to DNA damage checkpoint signaling
C1_01860W_A	orf19.4537	66.4454	61.3656	121.803	135.791	1.01108	0.00732107	Ortholog(s) have RNA polymerase II complex recruiting activity, RNA polymerase II regulatory region DNA binding activity
C1_01890C_A	orf19.4534	225.332	162.916	234.345	205.175	0.17895	0.818645	Putative UBX-domain (ubiquitin-regulatory domain) protein; macrophage-downregulated gene
C1_01900C_A	orf19.4533	26.942	27.3741	26.2379	25.2463	-0.0772485	0.925251	Ortholog(s) have RNA binding activity, role in rRNA processing and ribosome localization
C1_01910W_A	orf19.4532	168.314	160.556	76.8308	96.8812	-0.920818	0.0358571	Protein of unknown function; present in exponential and stationary growth phase yeast cultures
C1_01930W_A	orf19.4530.1	92.6195	88.5963	322.125	200.332	1.5276	0.000848373	Protein of unknown function; regulated by Nrg1, Tup1; Spider and flow model biofilm induced
C1_01940C_A	orf19.4529	72.8509	74.9075	63.9298	61.6821	-0.234267	0.730418	Ortholog of Srp21, signal recognition particle subunit, functions in protein targeting to the endoplasmic reticulum membrane; predicted adhesin-like protein; mutants are viable
C1_01950C_A	orf19.4528	72.4786	40.6738	62.9888	65.5191	0.183591	0.802839	Ortholog(s) have role in vacuolar protein processing
C1_01970W_A	orf19.4528.1	0	0	0	0	0	1	Protein of unknown function
C1_02000W_A	orf19.4525	25.4364	20.311	34.928	29.3881	0.491492	0.918283	Ortholog(s) have endoplasmic reticulum, nuclear pore localization
C1_02020W_A	orf19.4523	13.489	17.1815	19.3945	21.1121	0.401305	0.926318	Ortholog(s) have 5-formyltetrahydrofolate cyclo-ligase activity and role in folic acid-containing compound biosynthetic process
C1_02030C_A	orf19.4522	25.5784	26.1513	36.2107	35.3647	0.468471	0.911613	Ortholog(s) have role in cellular response to DNA damage stimulus
C1_02040C_A	orf19.3661	53.5189	41.2065	31.3973	36.7692	-0.474688	0.93506	Putative deubiquitinating enzyme; induced by Mnl1 under weak acid stress
C1_02060W_A	orf19.3663.1	174.859	107.665	48.123	51.6386	-1.50182	0.637902	Predicted plasma membrane protein; gene has intron
C1_02090C_A	orf19.3666	24.263	25.6521	25.512	41.724	0.429759	0.937858	Predicted debranching enzyme-associated ribonuclease; rat catheter biofilm induced
C1_02100W_A	orf19.3667	5.34489	7.02999	4.61092	3.64303	-0.584259	0.890256	Ortholog(s) have microtubule motor activity, protein homodimerization activity and kinesin complex localization
C1_02140C_A	orf19.3671	3.32788	8.10911	1.27595	2.01623	-1.79659	0.397797	Dubious open reading frame
C1_02160W_A	orf19.3673	38.5681	30.7224	25.0939	20.7705	-0.595283	0.737583	Ortholog(s) have Rab guanyl-nucleotide exchange factor activity, role in ER to Golgi vesicle-mediated transport, chromosome organization and TRAPPI protein complex, TRAPPII protein complex, TRAPPIII protein complex localization
C1_02200C_A	orf19.3677	32.068	33.7012	20.3015	12.8018	-0.990437	0.453148	Ortholog(s) have Atg8 ligase activity, enzyme activator activity and role in C-terminal protein lipidation, late nucleophagy, mitophagy, piecemeal microautophagy of the nucleus, protein localization by the Cvt pathway, reticulophagy
C1_02210W_A	orf19.3678	73.1175	59.5217	57.9872	51.0423	-0.282787	0.63759	Ortholog of C. dubliniensis CD36 : Cd36_02060, C. parapsilosis CDC317 : CPAR2_106200, Candida tenuis NRRL Y-1498 : CANTEDRAFT_96322 and Debaryomyces hansenii CBS767 : DEHA2C02310g
C1_02220C_A	orf19.3679	26.7612	30.5801	33.5292	31.4229	0.179799	0.804554	Putative protein of unknown function; stationary phase enriched protein
C1_02240W_A	orf19.3681	69.1747	66.2978	57.4497	74.2446	-0.0408071	0.963961	Ortholog(s) have Ran guanyl-nucleotide exchange factor activity, protein transporter activity
C1_02270C_A	orf19.3684	195.295	116.036	265.728	245.187	0.714636	0.124902	Putative oxidoreductase; Spider biofilm induced
C1_02290C_A	orf19.3686	21.3072	27.075	20.4685	27.8043	-0.00326449	0.995825	Ortholog(s) have protein domain specific binding activity, role in mitochondrial proton-transporting ATP synthase complex assembly and mitochondrion localization
C1_02300W_A	orf19.3687	28.3535	31.5653	21.7422	20.5551	-0.502445	0.580208	Ortholog(s) have unfolded protein binding activity, role in cytoskeleton organization, positive regulation of transcription elongation from RNA polymerase II promoter, protein folding and prefoldin complex localization
C1_02310C_A	orf19.3688	39.2587	37.363	32.892	31.1263	-0.259269	0.794345	Ortholog(s) have chromatin DNA binding activity and role in cell wall mannoprotein biosynthetic process, positive regulation of transcription by RNA polymerase II, telomere maintenance via recombination
C1_02320C_A	orf19.3689	51.8958	55.1366	57.6647	61.8149	0.158717	0.826764	Putative protein similar to 6-phosphofructo-2-kinase/fructose-2,6-bisphosphatase; expression downregulated in an ssr1 null mutant
C1_02330C_A	orf19.3690.2	1732.59	1744.25	1275.33	1854.32	-0.151773	0.853286	Ribosomal 60S subunit protein; Spider biofilm repressed
C1_02370C_A	orf19.3694	14.948	16.6937	8.79493	7.34524	-0.971168	0.0200408	Ortholog of C. dubliniensis CD36 : Cd36_02210, C. parapsilosis CDC317 : CPAR2_106350, Candida tenuis NRRL Y-1498 : CANTEDRAFT_116785 and Debaryomyces hansenii CBS767 : DEHA2C01980g
C1_02380C_A	orf19.2925	30.1732	22.2799	10.8883	19.595	-0.783011	0.246103	Ortholog(s) have role in protein folding, tubulin complex assembly
C1_02390W_A	orf19.2926	28.3533	23.5245	25.7347	43.9343	0.425397	0.432553	Putative nuclease required for DNA single- and double-strand break repair; rat catheter biofilm induced
C1_02410C_A	orf19.2928	33.5044	34.2548	26.8362	28.161	-0.301061	0.615138	Has domain(s) with predicted role in retrograde vesicle-mediated transport, Golgi to ER and integral component of membrane localization
C1_02430C_A	orf19.2930	62.0064	64.9871	63.4672	94.3315	0.31333	0.606463	Predicted translation initiation factor; role in translational initiation; Spider biofilm repressed
C1_02440C_A	orf19.2933	25.2885	17.2971	21.3197	23.5344	0.0748737	0.936531	Ortholog(s) have thiol-dependent ubiquitin-specific protease activity and role in protein deubiquitination, regulation of transcription, DNA-templated
C1_02450C_A	orf19.2934	241.492	139.135	164.421	395.699	0.557361	0.277567	Similar to S. cerevisiae Bud20; predicted role in cellular bud site selection; rat catheter and Spider biofilm induced
C1_02470W_A	orf19.2936	48.6341	50.9288	60.6872	50.7161	0.162112	0.851201	Ortholog of C. parapsilosis CDC317 : CPAR2_106450, C. dubliniensis CD36 : Cd36_02330, Lodderomyces elongisporus NRLL YB-4239 : LELG_01618 and Candida orthopsilosis Co 90-125 : CORT_0B07690
C1_02490C_A	orf19.2938	16.6165	20.4174	14.1356	15.9922	-0.297749	0.625988	Putative mitochondrial inner membrane protein with a predicted role in the assembly of respiratory complex III; Hap43p-repressed gene; S. cerevisiae ortholog FMP25 localizes to mitochondrion
C1_02500W_A	orf19.2939	18.1368	26.702	19.6848	13.0733	-0.452895	0.55661	Ortholog(s) have role in mitochondrial respiratory chain complex IV assembly and mitochondrion localization
C1_02510W_A	orf19.2940	10.9528	21.9849	22.2827	12.098	0.0618611	0.956322	Putative v-SNARE of the endoplasmic reticulum membrane; possibly an essential gene, disruptants not obtained by UAU1 method
C1_02560W_A	orf19.2943.5	7.09922	12.5809	12.7023	1.91161	-0.429396	0.83228	Ortholog of Candida albicans WO-1 : CAWG_05543
C1_02650W_A	orf19.2954	336.343	317.161	276.517	278.393	-0.235943	0.712746	Protein of unknown function; Hap43-repressed gene; repressed by nitric oxide
C1_02670C_A	orf19.2957	1.22089	1.12884	2.32017	1.67233	0.764799	0.402102	Protein required for transfer of mannosylphosphate; induced by alpha pheromone in SpiderM medium
C1_02680C_A	orf19.2958	6.95319	8.72444	11.987	6.88783	0.267756	0.70813	Planktonic growth-induced gene
C1_02690C_A	orf19.2959	1.15208	4.08332	1.76688	0	-1.56709	0.565523	Predicted ORF from Assembly 19; removed from Assembly 20; subsequently reinstated in Assembly 21 based on comparative genome analysis
C1_02700C_A	orf19.2959.1	12713.4	8492.16	3953.16	2652.16	-1.68275	0.000848373	Gene induced by hypoxia and ketoconazole; oral infection upregulated; mutants have reduced capacity to damage oral epithelial cells; Spider biofilm induced
C1_02720W_A	orf19.2961	12.7546	26.6167	23.5829	21.1843	0.185299	0.807483	Putative transcription factor with zinc finger DNA-binding motif
C1_02730W_A	orf19.2962	62.2862	48.3107	107.3	62.9988	0.622761	0.197857	Protein of unknown function; Spider biofilm induced
C1_02740C_A	orf19.2963	9.71113	12.1051	16.4081	7.17995	0.112652	0.918564	Has domain(s) with predicted NAD+ binding activity
C1_02750C_A	orf19.2964	45.9256	47.6834	46.5277	44.7809	-0.0358964	0.968342	Ortholog(s) have DNA translocase activity
C1_02760W_A	orf19.2965	160.685	150.755	96.7832	98.8121	-0.671083	0.1502	Putative guanyl-nucleotide exchange factor; Spider biofilm repressed
C1_02770W_A	orf19.2965.1	424.81	449.968	494.249	433.888	0.0854217	0.934106	Protein of unknown function; similar to human SERF2; gene has an alternatively spliced intron
C1_02780W_A	orf19.2966	90.8015	76.5004	90.012	61.4976	-0.143045	0.846723	Predicted dienelactone hydrolase domain; clade-associated gene expression; farnesol-downregulated; rat catheter biofilm repressed
C1_02800W_A	orf19.2968	24.2569	22.2799	16.7861	18.1612	-0.413191	0.591127	Protein of unknown function; Spider biofilm induced
C1_02830W_A	orf19.2971	19.7427	21.433	25.6558	24.4096	0.282017	0.643187	Ortholog of C. dubliniensis CD36 : Cd36_02630, C. parapsilosis CDC317 : CPAR2_108390, Candida tenuis NRRL Y-1498 : CANTEDRAFT_115724 and Debaryomyces hansenii CBS767 : DEHA2D07986g
C1_02850W_A	orf19.2973	84.4531	73.2375	108.822	198.384	0.962109	0.0391261	Ortholog(s) have RNA binding, flap-structured DNA binding activity, role in nuclear-transcribed mRNA poly(A) tail shortening, positive regulation of endodeoxyribonuclease activity and P-body, cytosol, nucleus localization
C1_02890C_A	orf19.2978	82.7241	81.8517	106.782	82.9749	0.2054	0.791732	Protein of unknown function; Hap43-repressed gene
C1_02900C_A	orf19.2980	20.6235	20.075	25.5784	35.5411	0.586659	0.222875	Ortholog(s) have ATP-dependent RNA helicase activity, role in generation of catalytic spliceosome for first transesterification step, spliceosomal complex disassembly and U2-type post-mRNA release spliceosomal complex localization
C1_02910C_A	orf19.2982	4.13552	7.75489	10.1774	9.24525	0.707942	0.271396	Ortholog(s) have SNARE binding, protein kinase activator activity, protein-containing complex scaffold activity
C1_02940C_A	orf19.2985	64.8284	74.0451	98.562	64.1748	0.228769	0.746272	Protein of unknown function; Hap43-repressed gene
C1_02950W_A	orf19.2986	19.6515	33.6246	27.0207	18.0643	-0.240841	0.837921	Ortholog of C. dubliniensis CD36 : Cd36_02750, C. parapsilosis CDC317 : CPAR2_106015, Candida tenuis NRRL Y-1498 : CANTEDRAFT_107500 and Debaryomyces hansenii CBS767 : DEHA2D08250g
C1_02960C_A	orf19.2987	47.6784	49.31	62.3822	62.2261	0.361515	0.522733	Ortholog(s) have role in cellular ion homeostasis, establishment or maintenance of cell polarity, mitochondrion inheritance, regulation of cardiolipin metabolic process and mitochondrial inner membrane localization
C1_02970W_A	orf19.2988	63.5601	83.3959	67.1446	42.9068	-0.417206	0.426028	Predicted aminotransferase based on S. pombe ortholog SPBC660.12c; flow model biofilm induced
C1_03040W_A	orf19.2995	44.0185	48.9904	52.8331	57.7184	0.249278	0.692599	Protein of unknown function; induced by nitric oxide; rat catheter and Spider biofilm induced
C1_03050W_A	orf19.2996	28.9404	30.3542	46.6527	54.0544	0.764192	0.0921768	Ortholog of S. cerevisiae : ECM30, C. glabrata CBS138 : CAGL0M00924g, C. dubliniensis CD36 : Cd36_02850, C. parapsilosis CDC317 : CPAR2_110240 and Candida tenuis NRRL Y-1498 : CANTEDRAFT_118420
C1_03100W_A	orf19.3003	55.8236	71.7694	69.0362	55.7331	-0.0322854	0.971659	Putative lipid-binding protein with a predicted role in calcium-dependent phospholipid-binding
C1_03120W_A	orf19.3004	207.347	204.253	204.025	167.868	-0.146355	0.851654	Ortholog of S. cerevisiae : YDR262W, C. glabrata CBS138 : CAGL0M08734g, C. dubliniensis CD36 : Cd36_02920, C. parapsilosis CDC317 : CPAR2_108490 and Candida tenuis NRRL Y-1498 : CANTEDRAFT_112432
C1_03140W_A	orf19.3007	20.3231	21.8393	23.5422	20.6089	0.0664892	0.957057	Ortholog(s) have role in endosome organization, regulation of protein localization and BLOC-1 complex localization
C1_03150C_A	orf19.3007.2	42.4075	52.5164	24.6832	17.7477	-1.16166	0.0284959	Ortholog of C. dubliniensis CD36 : Cd36_02950, C. parapsilosis CDC317 : CPAR2_108520, Candida tenuis NRRL Y-1498 : CANTEDRAFT_100285 and Debaryomyces hansenii CBS767 : DEHA2G15774g
C1_03170C_A	orf19.3009	5.15093	7.94278	14.6196	13.5097	1.1032	0.0290115	Ortholog(s) have nucleus-vacuole junction localization
C1_03180W_A	orf19.3010	13.0534	12.9923	10.6952	10.2557	-0.314024	0.709325	Putative lipoyl ligase; role in modification of mitochondrial enzymes by attachment of lipoic acid groups; rat catheter biofilm induced
C1_03240W_A	orf19.3016	59.0279	56.0729	87.6736	87.6343	0.606993	0.279051	Ortholog of C. dubliniensis CD36 : Cd36_03040, C. parapsilosis CDC317 : CPAR2_108610, Debaryomyces hansenii CBS767 : DEHA2G16500g and Pichia stipitis Pignal : PICST_32835
C1_03260W_A	orf19.3019	14.4848	17.5693	18.3641	18.4616	0.200204	0.763587	Putative DNA-dependent ATPase; transcription may be increased in an azole-resistant strain that overexpresses MDR1
C1_03270W_A	orf19.3021	50.2849	48.8428	31.9216	17.5852	-1.00166	0.0219281	Putative protein of unknown function; Hap43-repressed gene; Spider biofilm induced
C1_03280W_A	orf19.3022	145.211	148.32	139.531	133.127	-0.106425	0.894237	Ortholog(s) have structural constituent of ribosome activity and mitochondrial small ribosomal subunit localization
C1_03310W_A	orf19.3027	98.4052	73.1853	108.534	100.541	0.285049	0.636806	Putative DNA translocase; Spider biofilm repressed
C1_03330C_A	orf19.3030	10.3872	15.4655	31.9912	27.0985	1.19259	0.00862192	Ortholog(s) have phosphatidylinositol-3,5-bisphosphate binding, phosphatidylinositol-3-phosphate binding, phosphatidylinositol-4-phosphate binding activity
C1_03360W_A	orf19.3035	74.7413	68.173	60.525	57.0646	-0.281389	0.656601	Ortholog(s) have DNA-dependent ATPase activity, chromatin DNA binding, methylated histone binding, nucleosome-dependent ATPase activity, rDNA binding, transcription regulatory region DNA binding activity
C1_03370W_A	orf19.3037	1002.54	1026.44	836.934	1065.02	-0.0932711	0.915456	Putative poly(A)-binding protein; regulated by Gcn4p; induced in response to amino acid starvation (3-AT treatment); protein present in exponential and stationary growth phase yeast cultures
C1_03400W_A	orf19.3041	34.6035	33.8353	47.9389	43.0761	0.411289	0.430818	Ortholog(s) have ubiquitin protein ligase binding activity
C1_03410W_A	orf19.3042	30.4072	25.9328	10.4927	14.5844	-1.16779	0.0355801	Protein of unknown function; Hap43-induced; rat catheter biofilm induced
C1_03430W_A	orf19.3043	15.2363	12.0277	17.3129	9.17507	-0.0416609	0.969464	Ortholog(s) have triglyceride lipase activity, role in triglyceride catabolic process and mitochondrion localization
C1_03440C_A	orf19.3045	63.1666	63.6877	40.8785	42.5222	-0.605041	0.195233	Predicted aldehyde dehydrogenase domain; virulence-group-correlated expression
C1_03450C_A	orf19.3047	25.074	25.6966	23.955	22.8982	-0.115847	0.879849	Protein kinase-related protein, required for normal sensitivity to caspofungin
C1_03460C_A	orf19.3048	13.935	13.7824	7.31989	4.71618	-1.20343	0.00945532	Protein of unknown function; repressed by alpha pheromone in SpiderM medium
C1_03470C_A	orf19.3049	0.684949	0.693621	1.42564	0.790442	0.684838	0.683805	Ortholog(s) have role in ascospore wall assembly, ascospore-type prospore membrane assembly, protein localization to cell division site, regulation of establishment or maintenance of bipolar cell polarity regulating cell shape
C1_03490W_A	orf19.3051	87.2066	109.507	101.042	53.0106	-0.352671	0.536331	Protein of unknown function; S. pombe ortholog SPAC17A2.02c plays a role in resistance to cadmium; colony morphology-related gene regulation by Ssn6; Spider biofilm repressed
C1_03510C_A	orf19.3053	255.746	241.596	394.871	252.318	0.37995	0.495788	Protein of unknown function; present in exponential and stationary phase yeast; identified in extracts from biofilm and planktonic cells; flow model biofilm induced gene; GlcNAc-induced protein
C1_03540C_A	orf19.3057	66.5422	57.4235	35.9402	38.3286	-0.739113	0.231812	Ortholog(s) have role in mitochondrial genome maintenance
C1_03580W_A	orf19.3059.1	0	0	0	0	0	1	ORF added to Assembly 21 based on comparative genome analysis; overlaps orf19.3059.2, which is annotated as a blocked reading frame
C1_03600W_A	orf19.3060	138.444	170.434	81.7972	61.2657	-1.11039	0.00775566	OPutative dolichyl-diphosphooligosaccharide-protein glycotransferase; role in protein N-linked glycosylation; Spider biofilm repressed
C1_03620C_A	orf19.3061.1	618.09	664.403	554.397	795.853	0.0742764	0.929173	Ortholog of S. cerevisiae Rps22Ap and Rps22Bp; gene contains 5' UTR intron
C1_03630W_A	orf19.3062	10.47	11.2518	13.5619	18.287	0.552105	0.261456	Ortholog(s) have role in chromatin remodeling and ASTRA complex, TORC2 complex localization
C1_03660W_A	orf19.3064.1	22.8754	20.2694	78.9364	40.6538	1.47084	0.195475	Ortholog of C. parapsilosis CDC317 : CPAR2_108915, Candida tenuis NRRL Y-1498 : CANTEDRAFT_102387, Debaryomyces hansenii CBS767 : DEHA2B06776g and Pichia stipitis Pignal : psti_CGOB_00149
C1_03690W_A	orf19.71	65.1915	54.5625	60.5428	40.9846	-0.238204	0.709981	Ortholog(s) have role in ER to Golgi vesicle-mediated transport, protein secretion and COPII vesicle coat, Golgi membrane, cis-Golgi network localization
C1_03720C_A	orf19.1037	21.7356	26.3902	10.1504	6.37931	-1.54175	0.00156339	Protein of unknown function; rat catheter biofilm repressed
C1_03750W_A	orf19.1034	54.9477	43.2782	78.2884	49.5933	0.380633	0.526576	Protein with a predicted cytochrome b5-like Heme/Steroid binding domain; Hap43, caspofungin repressed; flow model biofilm induced
C1_03790C_A	orf19.1030	552.897	437.482	337.432	578.963	-0.112011	0.89727	Putative peptidyl-prolyl cis-trans isomerase
C1_03830C_A	orf19.1026	77.1797	72.4958	65.1475	105.603	0.190048	0.775528	Ortholog(s) have role in exonucleolytic trimming to generate mature 3'-end of 5.8S rRNA from tricistronic rRNA transcript (SSU-rRNA, 5.8S rRNA and LSU-rRNA), more
C1_03840W_A	orf19.1026.1	119.434	131.227	64.7202	129.927	-0.364879	0.662271	Ortholog of C. dubliniensis CD36 : Cd36_03580, C. parapsilosis CDC317 : CPAR2_105090, Candida tenuis NRRL Y-1498 : CANTEDRAFT_106351 and Debaryomyces hansenii CBS767 : DEHA2A09548g
C1_03870C_A	orf19.4459	68.7568	112.994	27.3656	25.1767	-1.79041	0.000848373	Predicted heme-binding stress-related protein; Tn mutation affects filamentous growth; induced during chlamydospore formation in C. albicans and C. dubliniensis; Spider biofilm induced
C1_03880C_A	orf19.4461	0	0	0	0	0	1	Ortholog of Candida albicans WO-1 : CAWG_01005
C1_03890W_A	orf19.4463	0	2.41217	0.313129	0.65973	-1.31003	0.518177	Ortholog of Candida albicans WO-1 : CAWG_01004
C1_03910C_A	orf19.4465	16.666	17.2569	16.4033	20.8908	0.136689	0.856891	Protein of unknown function; Spider biofilm induced
C1_03920C_A	orf19.4466	2.46395	3.04096	5.66826	4.62059	0.902289	0.216105	Ortholog(s) have protein-cysteine S-palmitoyltransferase activity and role in protein palmitoylation, protein targeting to membrane
C1_03930W_A	orf19.4467	10.399	9.21433	10.3318	10.1536	0.0627587	0.949192	Ortholog of C. dubliniensis CD36 : Cd36_03660, C. parapsilosis CDC317 : CPAR2_106860, Candida tenuis NRRL Y-1498 : CANTEDRAFT_96694 and Debaryomyces hansenii CBS767 : DEHA2G15950g
C1_03940W_A	orf19.4468	275.044	290.197	228.068	236.518	-0.282922	0.634418	Putative succinate dehydrogenase; localized to the mitochondrial membrane; Hap43p-repressed gene
C1_03950C_A	orf19.4470	3.86432	5.29177	6.19589	4.82435	0.267352	0.873263	Protein of unknown function; Hap43-repressed gene
C1_03960C_A	orf19.4471	11.2802	15.1666	15.6452	12.9949	0.114941	0.88215	Ortholog(s) have role in TOR signaling, re-entry into mitotic cell cycle after pheromone arrest and endoplasmic reticulum membrane, endoplasmic reticulum-Golgi intermediate compartment localization
C1_03970W_A	orf19.4472	2.0314	5.39994	0	1.64099	-2.17906	0.312718	Ortholog of Candida albicans WO-1 : CAWG_00996
C1_03990W_A	orf19.4474	15.3436	16.7775	23.1561	40.6124	0.989323	0.0474527	Ortholog(s) have proteasome binding activity and role in cellular response to arsenic-containing substance, proteasome-mediated ubiquitin-dependent protein catabolic process
C1_04010C_A	orf19.4476	34.651	36.6177	54.776	39.3486	0.401303	0.454211	Protein with a NADP-dependent oxidoreductase domain; transcript induced by ketoconazole; rat catheter and Spider biofilm induced
C1_04030W_A	orf19.4478	14.9607	16.46	10.325	7.04983	-0.854715	0.0782196	Ortholog(s) have aspartate-tRNA ligase activity, role in mitochondrial aspartyl-tRNA aminoacylation and mitochondrion localization
C1_04040C_A	orf19.4479	95.2332	76.4314	84.2515	170.843	0.571439	0.272202	Putative U3-containing 90S preribosome subunit; Hap43-induced; repressed in core stress response; Spider biofilm induced
C1_04090C_A	orf19.1041	8.08765	6.0262	7.32941	9.05752	0.215434	0.808449	Ortholog(s) have cyclin-dependent protein serine/threonine kinase activator activity
C1_04110W_A	orf19.1043	44.1317	36.6143	22.9411	20.0281	-0.910089	0.0660199	Ortholog(s) have lysophosphatidic acid acyltransferase activity, role in cellular triglyceride homeostasis, lipid droplet organization and endoplasmic reticulum, lipid droplet localization
C1_04120C_A	orf19.1045	70.4219	52.7713	30.2702	68.3317	-0.321234	0.58991	Putative U2 snRNP protein; Hap43p-induced gene; mutation confers hypersensitivity to 5-fluorocytosine (5-FC), 5-fluorouracil (5-FU), and tubercidin (7-deazaadenosine)
C1_04150C_A	orf19.1049	12.082	5.49007	13.7784	12.2626	0.567497	0.536721	Predicted NUDIX hydrolase domain; Hap43-induced
C1_04160C_A	orf19.1050	8.44173	10.0233	6.6028	5.0463	-0.664574	0.409302	Ortholog of S. cerevisiae : YMR087W, C. glabrata CBS138 : CAGL0J01397g, C. dubliniensis CD36 : Cd36_03920, C. parapsilosis CDC317 : CPAR2_107150 and Pichia stipitis Pignal : PICST_61741
C1_04180W_A	orf19.1052	1502.77	1178.89	612.805	397.422	-1.40844	0.000848373	Predicted histone H2B; Hap43-induced gene; Spider biofilm repressed
C1_04200C_A	orf19.1054	99.3225	91.1137	51.8207	53.1746	-0.858984	0.0413461	Ortholog(s) have role in endoplasmic reticulum tubular network membrane organization, nuclear envelope organization, nuclear pore distribution, nuclear pore organization, spindle pole body localization to nuclear envelope
C1_04220C_A	orf19.1057	52.2445	36.0055	37.0948	35.6908	-0.277943	0.704547	Ortholog of C. dubliniensis CD36 : Cd36_03980, C. parapsilosis CDC317 : CPAR2_107050, Candida tenuis NRRL Y-1498 : CANTEDRAFT_113999 and Debaryomyces hansenii CBS767 : DEHA2D12518g
C1_04230W_A	orf19.1058	18.9332	19.3703	10.4319	15.6754	-0.553019	0.702544	Ortholog(s) have ubiquitin binding activity, role in ubiquitin-dependent protein catabolic process and proteasome regulatory particle, lid subcomplex, proteasome storage granule localization
C1_04250C_A	orf19.1060	8.10088	9.22888	7.691	11.2183	0.12584	0.936239	Ortholog of Candida albicans WO-1 : CAWG_00968
C1_04270C_A	orf19.1062	0.800448	0.506614	0.613803	1.10848	0.397991	1	Ortholog of C. dubliniensis CD36 : Cd36_04020, C. parapsilosis CDC317 : CPAR2_107000, Candida tenuis NRRL Y-1498 : CANTEDRAFT_113990 and Pichia stipitis Pignal : PICST_32780
C1_04280C_A	orf19.1063	7.4583	8.74046	5.07349	6.31643	-0.508126	0.534099	Ortholog(s) have dolichyl-phosphate-mannose-glycolipid alpha-mannosyltransferase activity, role in GPI anchor biosynthetic process and integral component of endoplasmic reticulum membrane, mannosyltransferase complex localization
C1_04340C_A	orf19.1070	2.20293	1.67312	6.39506	4.57599	1.50104	0.128126	Ortholog(s) have role in phospholipid translocation, retrograde transport, endosome to Golgi and endosome, trans-Golgi network localization
C1_04350C_A	orf19.5203	14.9818	16.3645	22.2666	17.7796	0.353371	0.52711	Protein of unknown function; Hap43-induced gene
C1_04360C_A	orf19.5201.1	1900.88	1693.02	1161.3	863.649	-0.827665	0.0581062	Has domain(s) with predicted ATPase inhibitor activity, role in negative regulation of ATPase activity, negative regulation of nucleotide metabolic process and mitochondrion localization
C1_04370C_A	orf19.5201	145.837	168.541	132.02	161.778	-0.0976732	0.903794	Ortholog(s) have structural constituent of ribosome activity and mitochondrial small ribosomal subunit localization
C1_04430C_A	orf19.5194.1	44.7143	52.4751	33.0864	25.4946	-0.730367	0.151019	Putative protein of unknown function; clade-associated gene expression
C1_04440W_A	orf19.6833.2	4.70634	0.000264539	0.000153776	3.91315	-0.266301	0.870436	Ortholog of Candida albicans WO-1 : CAWG_00951
C1_04460C_A	orf19.6838	62.32	64.3663	77.8057	74.7276	0.267863	0.657701	Putative protein of unknown function, transcript upregulated in clinical isolates from HIV+ patients with oral candidiasis; Spider biofilm induced
C1_04470C_A	orf19.6840	22.2716	20.0633	74.8605	96.853	2.02008	0.000848373	Protein of unknown function; transcript detected in high-resolution tiling arrays; transcription induced by alpha pheromone in SpiderM medium; Spider and early-stage flow model biofilm induced
C1_04490W_A	orf19.6843	157.862	119.033	80.34	104.469	-0.583304	0.246172	Ortholog(s) have role in CENP-A containing nucleosome assembly, chromatin maintenance and nucleoplasm localization
C1_04510W_A	orf19.6845	24.7279	20.9803	29.651	37.7143	0.559552	0.242629	Putative transcription factor with bZIP DNA-binding motif; rat catheter biofilm induced
C1_04530C_A	orf19.6847	33.3305	38.4012	49.3155	63.832	0.657523	0.152974	Putative tRNA U44 2'-O-methyltransferase; virulence-group-correlated expression; induced during oral infection; mutants have reduced ability to damage oral epithelial cells; early-stage flow model biofilm induced
C1_04560W_A	orf19.6850	6.94144	8.61092	10.8232	6.79115	0.179614	0.838766	Putative transcription factor with C3HC4 zinc finger DNA-binding motif; mutants are viable
C1_04580C_A	orf19.6852	20.6153	24.4674	60.6227	42.1679	1.18906	0.0107075	Ortholog of Rmd6 involved in S. cerevisiae sporulation; flow model biofilm induced
C1_04590W_A	orf19.6852.1	1493.08	1574.77	4441.08	2345.49	1.14545	0.00280222	Protein of unknown function; Spider biofilm induced
C1_04600C_A	orf19.6853	131.172	132.277	124.132	105.505	-0.198172	0.773633	Protein of unknown function; Spider biofilm repressed
C1_04620W_A	orf19.6855	38.3302	43.824	37.7481	43.0119	-0.0246935	0.977833	Ortholog of C. dubliniensis CD36 : Cd36_04370, C. parapsilosis CDC317 : CPAR2_105410, Candida tenuis NRRL Y-1498 : CANTEDRAFT_114891 and Debaryomyces hansenii CBS767 : DEHA2D13420g
C1_04630C_A	orf19.783	19.5589	20.2881	21.8232	20.6993	0.0937545	0.905016	Ortholog(s) have role in endocytosis, phospholipid translocation, retrograde vesicle-mediated transport, Golgi to ER, vacuole organization and Golgi membrane, endosome localization
C1_04640W_A	orf19.782	42.8248	45.3808	63.0532	77.6476	0.673688	0.150098	Ortholog(s) have triglyceride lipase activity, role in lipid homeostasis and lipid droplet localization
C1_04690C_A	orf19.776	0.969512	1.04315	0.424826	0.447533	-1.20611	1	Ortholog(s) have chromatin binding activity and role in meiotic sister chromatid cohesion, protein localization to chromosome, centromeric region, reciprocal meiotic recombination, synaptonemal complex assembly
C1_04700C_A	orf19.775	11.4179	15.0312	25.1588	19.5388	0.756976	0.0921768	Ortholog of C. dubliniensis CD36 : Cd36_04450, C. parapsilosis CDC317 : CPAR2_105460, Debaryomyces hansenii CBS767 : DEHA2D07128g and Pichia stipitis Pignal : PICST_80203
C1_04710C_A	orf19.773	189.343	126.919	106.302	219.995	0.0450633	0.958931	Protein similar to S. cerevisiae Rsa3 predicted nucleolar protein involved in maturation of pre-60S ribosomal particles; rat catheter and Spider biofilm induced
C1_04720W_A	orf19.772.1	711.631	541.602	733.633	1478.9	0.820045	0.0749249	Ortholog of C. parapsilosis CDC317 : CPAR2_105440, Lodderomyces elongisporus NRLL YB-4239 : LELG_01504, Pichia stipitis Pignal : psti_CGOB_00118 and Candida orthopsilosis Co 90-125 : CORT_0B06660
C1_04780C_A	orf19.764	13.5119	15.2534	15.2285	13.1292	-0.0205909	0.980243	Ortholog(s) have role in negative regulation of TORC1 signaling and cytoplasm localization
C1_04790W_A	orf19.763	39.0912	33.7497	44.0033	41.6995	0.234595	0.740463	Small subunit of the heterodimeric cap binding complex; component of the spliceosomal commitment complex; Spider biofilm repressed
C1_04800C_A	orf19.762	1.97908	1.80842	3.84144	1.9984	0.624684	0.459458	Ortholog of C. parapsilosis CDC317 : CPAR2_105580, C. dubliniensis CD36 : Cd36_04550, Lodderomyces elongisporus NRLL YB-4239 : LELG_03202 and Candida orthopsilosis Co 90-125 : CORT_0B06800
C1_04820C_A	orf19.760	58.224	60.9147	36.5788	43.6339	-0.57074	0.423241	Ortholog(s) have role in ribosome biogenesis
C1_04840C_A	orf19.758	117.15	84.5347	100.592	125.235	0.163118	0.843269	Ortholog(s) have signal sequence binding activity, role in vacuolar transport and late endosome localization
C1_04850C_A	orf19.757.1	192.675	322.48	355.689	403.523	0.559496	0.511328	Protein of unknown function
C1_04860W_A	orf19.757	15.7036	21.3357	20.5286	14.5783	-0.0773048	0.92333	Ortholog of S. cerevisiae : YPR089W, C. glabrata CBS138 : CAGL0K08008g, C. dubliniensis CD36 : Cd36_04600, C. parapsilosis CDC317 : CPAR2_105630 and Candida tenuis NRRL Y-1498 : CANTEDRAFT_129373
C1_04910C_A	orf19.752	34.6549	36.6547	89.6581	83.8577	1.2829	0.00280222	Has domain(s) with predicted methyltransferase activity and role in metabolic process
C1_04930C_A	orf19.751	6.39887	14.4897	14.9022	12.6355	0.39869	0.646628	Ortholog of C. dubliniensis CD36 : Cd36_04660, Candida tropicalis MYA-3404 : CTRG_04484 and Candida albicans WO-1 : CAWG_00904
C1_04940C_A	orf19.750	8.86169	9.1085	11.1444	5.72685	-0.0910385	0.953678	Protein of unknown function; exogenously expressed protein is a substrate for Kex2p processing in vitro
C1_04960C_A	orf19.50	14.8332	14.0822	22.8504	19.6319	0.555028	0.256187	Ortholog(s) have role in SCF-dependent proteasomal ubiquitin-dependent protein catabolic process, cellular response to DNA damage stimulus, cellular response to methylmercury
C1_04970W_A	orf19.51	75.9648	83.8225	67.3513	105.691	0.114975	0.892998	Ortholog(s) have role in cytoplasmic translational initiation and cytoplasmic stress granule, eukaryotic translation initiation factor 3 complex localization
C1_04980C_A	orf19.52	41.6849	48.5027	40.2399	30.7912	-0.344478	0.550277	Ortholog(s) have role in cellular iron ion homeostasis and mitochondrion localization
C1_04990C_A	orf19.53	20.4298	18.2148	15.1795	14.7608	-0.368176	0.569782	Ortholog(s) have role in mRNA cis splicing, via spliceosome and U2-type prespliceosome, U2AF, commitment complex localization
C1_05010C_A	orf19.55	67.1958	53.4375	81.9274	139.97	0.879262	0.0441044	Ortholog(s) have role in cellular zinc ion homeostasis
C1_05100W_A	orf19.4061	3.34387	8.19162	3.16749	3.65458	-0.757798	0.470505	Protein of unknown function; clade-associated gene expression
C1_05120W_A	orf19.4059	20.709	20.6799	17.2245	17.083	-0.27072	0.673978	Ortholog(s) have role in actin cortical patch localization, arginine transport, endocytosis, late endosome to vacuole transport, lysine transport, regulation of intracellular pH
C1_05130W_A	orf19.4057	0.996244	0	1.14592	1.60955	1.46773	0.656067	Ortholog of Candida albicans WO-1 : CAWG_00885
C1_05150C_A	orf19.450	2.48213	4.39872	1.90336	6.01527	0.202664	0.95527	Protein of unknown function
C1_05160C_A	orf19.449	750.839	684.784	674.457	480.295	-0.314095	0.647114	Putative phosphatidyl synthase; stationary phase enriched protein; transcript repressed by yeast-hypha switch; Hap43-repressed; rat catheter, Spider and flow model biofilm induced
C1_05180C_A	orf19.446.2	397.14	382.689	312.15	254.646	-0.460326	0.437999	Protein with a NADH-ubiquinone oxidoreductase B18 subunit domain; gene has intron
C1_05190C_A	orf19.446.1	165.684	183.512	218.369	169.393	0.151134	0.8845	Protein with a NADH-ubiquinone oxidoreductase B18 subunit domain; gene has intron
C1_05200C_A	orf19.446	85.6897	57.2868	89.1858	65.9051	0.117336	0.88082	Protein of unknown function; constitutive expression independent of MTL or white-opaque status; upregulated in a cyr1 mutant
C1_05210C_A	orf19.445	124.69	116.185	86.7936	108.42	-0.303227	0.611919	Protein of unknown function; repressed by prostaglandins
C1_05220C_A	orf19.444	15.1353	21.0107	15.088	17.5246	-0.148407	0.905867	Has domain(s) with predicted nucleic acid binding, nucleotide binding activity
C1_05230W_A	orf19.443	49.18	41.6709	17.6777	43.9493	-0.559938	0.360682	Ortholog(s) have RNA polymerase III activity, role in tRNA transcription by RNA polymerase III, transcription initiation from RNA polymerase III promoter and RNA polymerase III complex, nuclear chromatin localization
C1_05250W_A	orf19.442	60.7134	55.3647	50.7828	29.1107	-0.538946	0.814702	Ortholog of Candida guilliermondii ATCC 6260 : PGUG_05525, Candida lusitaniae ATCC 42720 : CLUG_03378 and Candida albicans WO-1 : CAWG_00876
C1_05270C_A	orf19.439	175.204	149.57	140.49	142.086	-0.200799	0.761397	Ortholog(s) have recombinase activity, single-stranded DNA binding, structural constituent of ribosome activity
C1_05280W_A	orf19.438	9.31814	14.6183	17.3363	17.3992	0.537205	0.310872	Has domain(s) with predicted membrane localization
C1_05320C_A	orf19.433	9.96788	13.792	14.6993	8.54768	-0.0314874	0.973593	Ortholog(s) have Rab guanyl-nucleotide exchange factor activity, role in cellular protein-containing complex assembly, intra-Golgi vesicle-mediated transport and TRAPPII protein complex, trans-Golgi network localization
C1_05330C_A	orf19.432	17.6055	15.1542	31.0894	39.1712	1.1008	0.00732107	Predicted SCF ubiquitin ligase complex protein; Spider biofilm induced; rat catheter biofilm induced
C1_05360C_A	orf19.429	65.3132	58.913	64.321	101.787	0.41915	0.450345	Putative non-canonical poly(A) polymerase; repressed by nitric oxide; Spider biofilm induced
C1_05370C_A	orf19.428	12.2174	12.7795	14.1672	14.0097	0.172762	0.811123	Putative serine/threonine kinase; induced during planktonic growth; rat catheter biofilm repressed
C1_05380C_A	orf19.427	12.5284	12.0171	17.6098	20.7382	0.643693	0.147736	Ortholog(s) have telomeric DNA binding activity
C1_05390C_A	orf19.426	18.6152	29.9953	29.7714	29.4572	0.285026	0.636638	Ortholog of C. dubliniensis CD36 : Cd36_05120, C. parapsilosis CDC317 : CPAR2_107740, Candida tenuis NRRL Y-1498 : CANTEDRAFT_136277 and Debaryomyces hansenii CBS767 : DEHA2A02266g
C1_05400C_A	orf19.425	29.9618	25.744	25.0642	30.56	-0.00211868	0.996458	Ortholog(s) have mitochondrial large ribosomal subunit localization
C1_05420W_A	orf19.423	66.3531	59.385	39.6311	49.8299	-0.491092	0.369144	Ortholog(s) have enzyme activator activity, mRNA binding activity, role in deadenylation-dependent decapping of nuclear-transcribed mRNA and Dcp1-Dcp2 complex, P-body, cytoplasmic side of membrane, nucleus localization
C1_05440C_A	orf19.419	17.9613	22.3311	79.8315	36.9396	1.5351	0.000848373	Protein of unknown function; flow model biofilm induced; Spider biofilm induced
C1_05450W_A	orf19.420	2.62355	13.699	35.1561	20.581	1.77177	0.594517	Protein of unknown function
C1_05480C_A	orf19.416	3.4709	3.53112	10.0548	8.82687	1.43115	0.0479282	Ortholog of C. dubliniensis CD36 : Cd36_05200, C. parapsilosis CDC317 : CPAR2_107660, Candida tenuis NRRL Y-1498 : cten_CGOB_00159 and Debaryomyces hansenii CBS767 : DEHA2E07854g
C1_05490C_A	orf19.415	67.8133	84.7394	60.8344	60.75	-0.32735	0.574794	Putative protein of unknown function; Hap43p-repressed gene
C1_05520W_A	orf19.413	69.7805	67.0813	187.259	119.053	1.16228	0.00687572	Protein of unknown function; induced by Sfu1; Spider biofilm induced
C1_05540C_A	orf19.411	194.952	140.706	152.377	370.229	0.638732	0.226616	Protein similar to GTPase regulators; induced in low iron; transcript activated by Mnl1 under weak acid stress; Hap43-, Sfu1- and Sef1-regulated; flow model biofilm induced, Spider biofilm induced
C1_05610W_A	orf19.2494	21.2094	17.0546	27.2975	20.1522	0.310413	0.609515	Ortholog(s) have glutaminyl-tRNA synthase (glutamine-hydrolyzing) activity, role in glutaminyl-tRNAGln biosynthesis via transamidation, mitochondrial translation and glutamyl-tRNA(Gln) amidotransferase complex, mitochondrion localization
C1_05630C_A	orf19.2489	160.579	174.596	164.992	256.234	0.329677	0.609959	Putative karyopherin beta; repressed by nitric oxide
C1_05650W_A	orf19.2487	49.9727	48.2367	55.2791	77.4732	0.434804	0.401972	Protein with a predicted phosphoribulokinase/uridine kinase domain; Spider biofilm induced
C1_05660C_A	orf19.2485	43.5874	45.1871	46.4295	65.8851	0.339327	0.568641	Ortholog(s) have promoter-specific chromatin binding, protein-containing complex binding, structural constituent of nuclear pore activity
C1_05670W_A	orf19.2484	51.699	58.158	54.5537	47.8459	-0.101417	0.891532	Has domain(s) with predicted peptidase activity and role in proteolysis
C1_05690C_A	orf19.2481	6.30316	3.46661	18.5003	13.6951	1.72046	0.0228689	Protein of unknown function; Spider biofilm induced
C1_05720W_A	orf19.2478.1	2632.77	2679.57	2509.87	3376.3	0.147985	0.878514	60S ribosomal protein L7; snoRNA snR39b encoded within the 2nd intron
C1_05740C_A	orf19.2478	7.79194	8.35195	6.07143	3.65482	-0.731033	0.328971	Ortholog of C. dubliniensis CD36 : Cd36_05410, C. parapsilosis CDC317 : CPAR2_107480, Candida tenuis NRRL Y-1498 : CANTEDRAFT_94695 and Debaryomyces hansenii CBS767 : DEHA2D02288g
C1_05750C_A	orf19.2476	17.5623	25.6055	18.8951	20.5928	-0.128544	0.870346	Ortholog(s) have histone demethylase activity (H3-trimethyl-K4 specific) activity
C1_05780W_A	orf19.2473	36.9064	43.0904	37.2379	36.146	-0.124481	0.866597	Putative RSC chromatin remodeling complex component; decreased transcription is observed upon fluphenazine treatment or in an azole-resistant strain that overexpresses CDR1 and CDR2
C1_05790W_A	orf19.2472.1	242.468	278.035	199.601	201.629	-0.375475	0.648175	Ortholog of C. dubliniensis CD36 : Cd36_61610, C. parapsilosis CDC317 : CPAR2_107530, Candida tenuis NRRL Y-1498 : CANTEDRAFT_115252 and Debaryomyces hansenii CBS767 : DEHA2D02200g
C1_05800C_A	orf19.2472	14.2401	14.7565	12.5854	15.5977	-0.0410529	0.972473	Ortholog of S. pombe replication termination factor Rtf2; Spider biofilm induced
C1_05830W_A	orf19.2468	0	0.145844	0	0.531848	1.86658	1	Ortholog(s) have trans-aconitate 3-methyltransferase activity and cytosol localization
C1_05890W_A	orf19.2460	324.117	279.093	219.332	155.193	-0.687598	0.160158	Protein of unknown function; substrate for Kex2 processing in vitro; repressed by alpha pheromone in SpiderM medium; Spider biofilm induced; Bcr1-repressed in a/a RPMI biofilms
C1_05900W_A	orf19.2459	47.2002	46.6369	50.692	66.7781	0.324062	0.57835	Protein of unknown function; mRNA binds to She3; Hap43 repressed gene; Spider biofilm induced
C1_05920W_A	orf19.2457	19.3519	18.2086	13.9211	13.3922	-0.459612	0.387899	Protein of unknown function; induced during chlamydospore formation in both C. albicans and C. dubliniensis; Spider biofilm induced
C1_05930C_A	orf19.2455	12.458	10.7112	17.5754	26.6076	0.931284	0.0326131	Ortholog(s) have glutathione hydrolase activity, omega peptidase activity, role in glutathione catabolic process and cytoplasm, glutathione hydrolase complex, nuclear periphery localization
C1_05950C_A	orf19.2452	108.966	102.962	112.682	103.09	0.0259295	0.977226	Protein of unknown function; induced in high iron; repressed in core caspofungin response; ketoconazole-repressed; colony morphology-related gene regulation by Ssn6; possibly subject to Kex2 processing
C1_05970W_A	orf19.2449	92.6585	107.627	6.05564	3.4023	-4.40439	0.000848373	Putative adhesin-like protein; macrophage-induced gene
C1_05980W_A	orf19.2447	8.19203	11.8024	15.1532	12.629	0.474559	0.397977	Putative Type II phosphatidylinositol 4-kinase; Ssr1-repressed; flow model biofilm repressed
C1_05990C_A	orf19.2446	10.3447	11.5784	13.1514	13.7444	0.294926	0.699344	Has domain(s) with predicted 2-dehydropantoate 2-reductase activity, NADP binding, coenzyme binding, oxidoreductase activity, oxidoreductase activity, acting on the CH-OH group of donors, NAD or NADP as acceptor activity
C1_06000W_A	orf19.2445	20.6079	14.4923	22.3871	21.2055	0.312605	0.594406	Putative dicarboxylic amino acid permease; fungal-specific (no human or murine homolog); induced by alpha pheromone in SpiderM medium
C1_06030C_A	orf19.2442	4.71151	10.2282	14.6323	10.8471	0.77018	0.315198	Ortholog of S. cerevisiae Shg1; a COMPASS (Set1C) complex subunit that methylates histone H3 on lysine 4 and is required in transcriptional silencing near telomeres; repressed in an azole-resistant strain overexpressing MDR1
C1_06050C_A	orf19.2439.1	535.918	597.275	480.361	380.97	-0.395754	0.48765	Ortholog(s) have ubiquinol-cytochrome-c reductase activity, role in aerobic respiration, mitochondrial electron transport, ubiquinol to cytochrome c and mitochondrial respiratory chain complex III localization
C1_06070W_A	orf19.2438	144.151	145.007	108.67	157.794	-0.117918	0.877743	Has domain(s) with predicted structural constituent of ribosome activity, role in translation and ribosome, small ribosomal subunit localization
C1_06090C_A	orf19.2436	54.0536	39.4712	57.3264	81.6771	0.571699	0.262564	Predicted protein serine/threonine kinase; Spider biofilm induced
C1_06120C_A	orf19.2433	2.2165	3.92798	1.48721	2.23814	-0.721917	0.664727	Has domain(s) with predicted flap-structured DNA binding activity and role in double-strand break repair via single-strand annealing, removal of nonhomologous ends
C1_06140C_A	orf19.2431	10.1916	28.5969	17.5842	15.0937	-0.247315	0.86584	Dubious open reading frame, only conserved in Candida dubliniensis; induced by alpha pheromone in SpiderM medium; mRNA binds She3; Spider biofilm induced; flow model biofilm repressed
C1_06150W_A	orf19.2430	0.452193	0	0.346753	1.09586	1.67367	1	Ortholog of Candida albicans WO-1 : CAWG_00792
C1_06160W_A	orf19.2429	2.45849	4.26606	2.27799	3.39274	-0.245904	0.847319	Protein of unknown function; induced by alpha pheromone in SpiderM medium
C1_06190C_A	orf19.2662	149.847	133.863	54.2787	32.3934	-1.71078	0.000848373	Predicted ORF of unknown function; overlaps TLO34/orf19.2661
C1_06200W_A	orf19.2663	10.8037	14.0898	14.2938	9.52637	-0.0635865	0.947208	Ortholog of Pichia stipitis Pignal : PICST_29216 and Candida albicans WO-1 : CAWG_00788
C1_06220C_A	orf19.1827	0.306513	3.98339	1.4886	2.80618	0.00164082	0.992016	Protein of unknown function; flow model biofilm induced; induced by alpha pheromone in SpiderM medium
C1_06250W_A	orf19.1825	1.16718	2.63725	1.02928	0.471432	-1.34204	0.16543	Protein of unknown function; mutants are viable; filament induced; regulated by Nrg1, Rfg1, Tup1
C1_06270W_A	orf19.1823	7.95041	10.2581	8.55659	7.43649	-0.187161	0.797815	Predicted membrane protein; transcript repressed by ciclopirox olamine
C1_06290C_A	orf19.1821	0	0	0	1.72336	inf	1	Protein of unknown function; repressed by alpha pheromone in SpiderM medium
C1_06320W_A	orf19.177	14.9587	12.1103	20.507	24.95	0.74786	0.0931294	Has domain(s) with predicted phosphatidylinositol binding activity and role in cell communication
C1_06330W_A	orf19.6280	0.783711	0	0	0	#N/A	1	Dubious open reading frame
C1_06340W_A	orf19.6277	13.3111	19.4362	14.4339	8.48109	-0.515083	0.305749	Ortholog of C. dubliniensis CD36 : Cd36_05920, C. parapsilosis CDC317 : CPAR2_803860, Pichia stipitis Pignal : PICST_30324 and Candida guilliermondii ATCC 6260 : PGUG_04439
C1_06350W_A	orf19.6276	62.2702	72.6459	74.7315	58.3052	-0.0202378	0.981075	Protein of unknown function; rat catheter biofilm repressed
C1_06360W_A	orf19.6275	15.9551	15.9572	13.9307	17.0999	-0.0404215	0.963594	Ortholog(s) have ribosomal protein S6 kinase activity, role in TORC1 signaling, peptidyl-serine phosphorylation, protein autophosphorylation and cytoplasm localization
C1_06380C_A	orf19.6273	135.643	132.209	127.046	185.493	0.222599	0.761888	Ortholog of C. dubliniensis CD36 : Cd36_05960, C. parapsilosis CDC317 : CPAR2_301790, Candida tenuis NRRL Y-1498 : CANTEDRAFT_112420 and Debaryomyces hansenii CBS767 : DEHA2G15290g
C1_06390W_A	orf19.6272	17.5073	19.7105	20.0586	20.7979	0.134575	0.88895	Putative ubiquitin C-terminal hydrolase; regulated by Gcn2p and Gcn4p
C1_06400C_A	orf19.6271	62.0293	71.7119	71.2546	100.364	0.359763	0.540843	Ortholog(s) have role in mRNA splicing, via spliceosome and transcriptionally active chromatin localization
C1_06410W_A	orf19.6269	8.66927	10.9738	14.0174	15.1268	0.569186	0.245793	Ortholog of C. dubliniensis CD36 : Cd36_05990, Candida tenuis NRRL Y-1498 : CANTEDRAFT_91852, Debaryomyces hansenii CBS767 : DEHA2G15356g and Pichia stipitis Pignal : PICST_87044
C1_06420C_A	orf19.6268	13.2311	15.3842	22.4037	16.7336	0.451759	0.383617	Putative cohesin complex subunit; expression downregulated in an ssr1 null mutant
C1_06430C_A	orf19.6267	2.43314	2.96444	4.66448	3.52155	0.600853	0.520501	Ortholog of C. dubliniensis CD36 : Cd36_06020, C. parapsilosis CDC317 : CPAR2_803380, Candida tenuis NRRL Y-1498 : CANTEDRAFT_91858 and Pichia stipitis Pignal : PICST_30337
C1_06440C_A	orf19.6266	27.7391	28.4804	34.0636	62.758	0.784259	0.0801742	Protein of unknown function; Spider biofilm induced
C1_06470W_A	orf19.6264.4	23979.9	21808.2	22605.7	26060.9	0.0879613	0.916292	Ortholog of S. cerevisiae Rpl39; a component of the 60S ribosomal subunit; Hap43-induced; Spider biofilm repressed
C1_06480C_A	orf19.6264.3	443.739	332.498	281.603	453.221	-0.0790984	0.924827	Ortholog(s) have role in ER to Golgi vesicle-mediated transport and COPII-coated ER to Golgi transport vesicle, Golgi apparatus, endoplasmic reticulum localization
C1_06500W_A	orf19.6264	72.01	62.5834	38.1064	45.3469	-0.689565	0.146844	Ortholog of C. dubliniensis CD36 : Cd36_06080, C. parapsilosis CDC317 : CPAR2_803360, Candida tenuis NRRL Y-1498 : CANTEDRAFT_112428 and Debaryomyces hansenii CBS767 : DEHA2G15532g
C1_06510C_A	orf19.6263	35.58	32.7527	34.1803	53.8911	0.366097	0.521209	Predicted MFS membrane transporter; member of the monocarboxylate porter (MCP) family; Spider biofilm induced
C1_06530C_A	orf19.6260	32.3103	30.8728	44.2137	66.761	0.812621	0.0765059	Ubiquitin-specific protease; cleaves ubiquitin from ubiquitinated proteins; Spider biofilm induced
C1_06540C_A	orf19.6259	44.2059	38.1481	32.7191	73.9042	0.372612	0.515013	Exosome non-catalytic core component; involved in 3'-5' RNA processing and degradation in the nucleus and cytoplasm; Spider biofilm induced
C1_06560W_A	orf19.6255	10.6313	18.4636	21.8484	21.6421	0.579929	0.286334	Putative protein of unknown function; Hap43p-repressed gene
C1_06590C_A	orf19.6252	64.852	67.8263	84.6952	80.443	0.315741	0.577839	Ortholog(s) have transcription factor activity, RNA polymerase II transcription factor binding, transcription factor activity, core RNA polymerase II binding activity
C1_06600W_A	orf19.6250	334.367	317.438	322.656	225.504	-0.249844	0.714866	Ortholog(s) have eukaryotic initiation factor 4G binding, mRNA binding activity and role in cytoplasmic mRNA processing body assembly, negative regulation of translational initiation, stress granule assembly
C1_06620C_A	orf19.6248	0.236995	0.839985	1.99907	2.87171	2.17716	0.387166	Ortholog of C. dubliniensis CD36 : Cd36_06210, Candida tropicalis MYA-3404 : CTRG_04227 and Candida albicans WO-1 : CAWG_00750
C1_06630W_A	orf19.6247	10.8608	9.88361	8.2533	4.97954	-0.648601	0.212375	Ortholog(s) have chromatin binding activity
C1_06640C_A	orf19.6247.1	3864.03	3258.37	4483.1	4003.29	0.252788	0.687929	Ortholog(s) have protein transmembrane transporter activity and role in mitochondrial outer membrane translocase complex assembly, protein targeting to mitochondrion
C1_06650W_A	orf19.6246	126.163	76.3518	94.0023	115.312	0.0476436	0.957345	Ortholog(s) have peptide alpha-N-acetyltransferase activity and role in N-terminal peptidyl-methionine acetylation, mitochondrion inheritance, regulation of actin cytoskeleton organization, ubiquitin-dependent ERAD pathway
C1_06660W_A	orf19.6245	66.0574	64.2595	65.4639	67.562	0.029683	0.973776	Protein of unknown function; regulated by osmotic stress via Hog1 and oxidative stress (Hog1- and Cap1-independent); induced by alpha pheromone in SpiderM medium; Spider biofilm induced
C1_06670W_A	orf19.6244	14.7084	21.4252	22.6858	14.492	0.0410976	0.962818	Ortholog of C. dubliniensis CD36 : Cd36_06250, C. parapsilosis CDC317 : CPAR2_206820, Candida tenuis NRRL Y-1498 : CANTEDRAFT_125137 and Debaryomyces hansenii CBS767 : DEHA2G13266g
C1_06700W_A	orf19.6240	25.1403	35.3087	15.4094	14.0226	-1.03833	0.019049	SH3-domain protein; role in barrier septum assembly involved in cell cycle cytokinesis; activates the Chs2 chitin synthase activity during cytokinesis; Spider biofilm repressed
C1_06710W_A	orf19.6239	30.3582	27.2787	27.4326	22.9118	-0.195161	0.789539	Putative serine/threonine protein kinase, involved in control of filamentous growth; possibly an essential gene, disruptants not obtained by UAU1 method
C1_06720C_A	orf19.6238	11.9309	13.3978	17.9354	12.5006	0.265012	0.730882	Ortholog(s) have mitochondrion localization
C1_06750W_A	orf19.6235	74.1345	53.1224	46.4672	79.6752	-0.0126896	0.989823	Protein of unknown function; Spider biofilm induced
C1_06760C_A	orf19.6234	83.0158	63.1247	91.0698	160.96	0.786239	0.0982712	Putative U2 snRNP component; mutation confers hypersensitivity to 5-fluorocytosine (5-FC), 5-fluorouracil (5-FU), and tubercidin (7-deazaadenosine); Hap43-induced, Spider biofilm induced
C1_06770W_A	orf19.6233	52.2087	48.2413	42.3657	63.2621	0.0725119	0.932449	Has domain(s) with predicted oxidoreductase activity and role in metabolic process
C1_06800W_A	orf19.6230	77.3377	61.5347	64.7973	111.61	0.345152	0.551365	Ortholog(s) have GDP binding, RNA pyrophosphohydrolase activity, enzyme regulator activity, phosphodiesterase decapping endonuclease activity
C1_06820W_A	orf19.6227	218.077	186.74	175.256	268.115	0.131242	0.871109	Ortholog of C. dubliniensis CD36 : Cd36_06390, C. parapsilosis CDC317 : CPAR2_209040, Candida tenuis NRRL Y-1498 : CANTEDRAFT_114052 and Debaryomyces hansenii CBS767 : DEHA2D14300g
C1_06840C_A	orf19.6225.1	317.488	231.479	179.238	154.488	-0.718054	0.144393	Ortholog(s) have role in mitochondrial respiratory chain complex IV assembly, positive regulation of protein oligomerization and extrinsic component of matrix side of mitochondrial inner membrane, mitochondrial matrix localization
C1_06860W_A	orf19.6224	33.6638	27.4781	24.271	15.2966	-0.627842	0.205375	RTA domain protein; predicted role in response to stress; Spider biofilm induced
C1_06870C_A	orf19.6222.1	141.919	111.779	60.4594	54.1373	-1.14655	0.216105	Ortholog of C. parapsilosis CDC317 : CPAR2_208910, Candida tenuis NRRL Y-1498 : CANTEDRAFT_114047, Debaryomyces hansenii CBS767 : DEHA2D14388g and Pichia stipitis Pignal : PICST_37629
C1_06890C_A	orf19.6220.4	3028.23	3150.17	2505.54	2909.41	-0.190284	0.796388	Ribosomal 60S subunit protein; Spider biofilm repressed
C1_06910C_A	orf19.6220	33.559	30.0295	42.5389	44.2391	0.448563	0.395716	Ortholog(s) have role in positive regulation of transcription elongation from RNA polymerase II promoter and CCR4-NOT core complex localization
C1_06920C_A	orf19.6219	20.7947	25.0518	17.3598	9.35072	-0.779401	0.107977	Ortholog of C. dubliniensis CD36 : Cd36_06470, C. parapsilosis CDC317 : CPAR2_208960, Candida tenuis NRRL Y-1498 : CANTEDRAFT_114040 and Pichia stipitis Pignal : PICST_51125
C1_06970C_A	orf19.6211	71.1931	52.1368	49.9809	32.9569	-0.57242	0.240886	Protein of unknown function; protein newly produced during adaptation to the serum
C1_06980C_A	orf19.6209	32.5238	31.624	48.1144	38.0533	0.425749	0.427186	Predicted membrane transporter; monocarboxylate porter (MCP) family, major facilitator superfamily (MFS); possibly essential, disruptants not obtained by UAU1 method; rat catheter and Spider biofilm induced
C1_07010W_A	orf19.6205	22.0982	23.3303	43.7458	34.563	0.785575	0.0985746	Ortholog of C. dubliniensis CD36 : Cd36_06550, C. parapsilosis CDC317 : CPAR2_209030, Candida tenuis NRRL Y-1498 : CANTEDRAFT_111035 and Debaryomyces hansenii CBS767 : DEHA2F25300g
C1_07040C_A	orf19.6200	1.88822	3.06738	0.965292	0.381332	-1.87971	0.265809	Pry family pathogenesis-related protein; oral infection upregulated gene; mutant has reduced capacity to damage oral epithelial cells
C1_07050C_A	orf19.6199	12.5483	17.2662	18.8746	20.8581	0.414314	0.448154	Ortholog(s) have ATP-dependent 5'-3' DNA helicase activity and DNA helicase A complex, alpha DNA polymerase:primase complex localization
C1_07060C_A	orf19.6198.1	129.069	83.1747	63.801	82.7213	-0.534602	0.429606	Ortholog of S. cerevisiae : YIL156W-B, C. glabrata CBS138 : CAGL0H06732g, C. dubliniensis CD36 : Cd36_06600, C. parapsilosis CDC317 : CPAR2_208850 and Candida tenuis NRRL Y-1498 : CANTEDRAFT_116509
C1_07080W_A	orf19.6196	33.817	33.9982	42.3883	36.7738	0.223204	0.776929	Component of the SWI/SNF and RSC chromatin remodeling complexes; suggested role in chromosome maintenance; Spider biofilm induced
C1_07090C_A	orf19.6195	56.067	50.2461	60.0573	89.5036	0.492414	0.357568	Ortholog(s) have 3'-5'-exoribonuclease activity
C1_07100C_A	orf19.6194	8.31537	12.7524	11.404	12.0135	0.15255	0.881955	Ortholog of C. dubliniensis CD36 : Cd36_06640, C. parapsilosis CDC317 : CPAR2_208220, Candida tenuis NRRL Y-1498 : CANTEDRAFT_136902 and Debaryomyces hansenii CBS767 : DEHA2F26730g
C1_07130C_A	orf19.4455	86.551	73.297	80.9425	108.475	0.244871	0.710051	Protein of unknown function; Spider biofilm induced
C1_07150W_A	orf19.4450.2	109.937	99.3612	35.407	145.646	-0.20915	0.856921	Ortholog of C. dubliniensis CD36 : Cd36_06690, Debaryomyces hansenii CBS767 : DEHA2F26620g, Pichia stipitis Pignal : PICST_62738 and Spathaspora passalidarum NRRL Y-27907 : spas_CGOB_00038
C1_07160C_A	orf19.4450.1	8405.07	7753.02	1396.51	889.957	-2.82106	0.000848373	Protein conserved among the CTG-clade; 2 adjacent upstream SRE-1 elements; highly up-regulated in cecum-grown cells in a Cph2-dependent manner; Hap43-repressed; rat catheter, Spider and flow model biofilm induced
C1_07210C_A	orf19.4446	36.8045	33.2231	39.0413	50.1092	0.348319	0.537796	Protein similar to ammomium permeases that is probably inactive, as a mep2 mep3 double homozygous null mutation abolishes cellular ammomium permease activity; fungal-specific (no human or murine homolog)
C1_07220W_A	orf19.4445	2060.91	1814.97	639.33	1043.43	-1.20369	0.00592979	Protein of unknown function; Plc1p-regulated; expression induced early upon infection of reconstituted human epithelium (RHE), while expression of the C. dubliniensis ortholog is not; mutant is viable; Spider biofilm induced
C1_07260C_A	orf19.4441	20.6674	30.1277	25.2209	19.3881	-0.187354	0.785031	Ortholog(s) have DNA replication origin binding, single-stranded DNA binding activity
C1_07280C_A	orf19.4439.1	53.4855	91.6252	68.3567	77.7711	0.0100763	0.991431	Ortholog(s) have role in nucleotide-excision repair, phosphorylation of RNA polymerase II C-terminal domain, transcription by RNA polymerase II
C1_07290W_A	orf19.4439	3.44325	5.66612	6.78951	9.9339	0.876447	0.502196	Ortholog of Candida albicans WO-1 : CAWG_00687
C1_07340W_A	orf19.4437	54.2801	58.5155	51.0528	62.7117	0.0123412	0.988011	Ortholog(s) have ATPase activity, DNA binding, nucleosome binding, rDNA binding, transcription regulatory region DNA binding activity
C1_07360W_A	orf19.4435	29.6589	26.6467	39.8981	58.5858	0.806613	0.085889	Ortholog(s) have structural constituent of cytoskeleton activity, role in microtubule nucleation and spindle pole body localization
C1_07390W_A	orf19.4430	29.5628	38.4193	45.8428	47.1654	0.452201	0.372975	Ortholog(s) have ubiquitin binding activity and role in proteasome-mediated ubiquitin-dependent protein catabolic process
C1_07400C_A	orf19.4428	9.26104	10.321	28.4796	38.1	1.76555	0.000848373	Ortholog of C. dubliniensis CD36 : Cd36_06910, C. parapsilosis CDC317 : CPAR2_208560, Candida tenuis NRRL Y-1498 : CANTEDRAFT_95854 and Debaryomyces hansenii CBS767 : DEHA2F25982g
C1_07440W_A	orf19.4423	27.3691	28.6857	32.0506	23.8462	-0.00407135	0.994736	Putative glucosyltransferase; localized to the mitochondrial membrane
C1_07470C_A	orf19.2798	3.87992	6.10527	5.33488	5.0256	0.0532288	0.961198	Putative helicase; fungal-specific (no human or murine homolog)
C1_07480C_A	orf19.2797	0.282982	0.438803	1.08499	1.14298	1.62609	0.234924	Has domain(s) with predicted ATP binding, DNA binding, helicase activity, hydrolase activity, nucleic acid binding activity
C1_07490C_A	orf19.2796	15.2857	12.4351	10.0542	15.3817	-0.124103	0.879541	Ortholog(s) have DNA-directed DNA polymerase activity, role in DNA replication initiation, telomere capping and alpha DNA polymerase:primase complex, nuclear envelope localization
C1_07510W_A	orf19.2794	44.7718	46.6428	21.691	50.3919	-0.342769	0.576961	Putative non-specific single-domain racemase; regulated by Gcn4p; repressed in response to amino acid starvation (3-AT treatment); alkaline upregulated; macrophage-induced protein
C1_07530W_A	orf19.2800	0	0	0	0	0	1	Ortholog of Candida albicans WO-1 : CAWG_00667
C1_07560W_A	orf19.2789	8.27346	12.0338	23.5816	23.9593	1.22718	0.0247052	Ortholog of C. dubliniensis CD36 : Cd36_07040, C. parapsilosis CDC317 : CPAR2_208700, Candida tenuis NRRL Y-1498 : CANTEDRAFT_108836 and Debaryomyces hansenii CBS767 : DEHA2F25674g
C1_07570C_A	orf19.2788	11.9771	11.6531	16.9279	18.7813	0.595669	0.298611	Has domain(s) with predicted RNA binding, pseudouridine synthase activity and role in pseudouridine synthesis
C1_07590C_A	orf19.2786	9.85353	14.6709	14.8641	10.1128	0.0263763	0.975134	Ortholog(s) have AP-2 adaptor complex, cellular bud neck localization
C1_07610C_A	orf19.2784	2.86674	4.09248	2.56467	1.54386	-0.760304	0.527791	Ortholog of C. dubliniensis CD36 : Cd36_07090, Candida tenuis NRRL Y-1498 : cten_CGOB_00237, Debaryomyces hansenii CBS767 : DEHA2F25542g and Pichia stipitis Pignal : psti_CGOB_00186
C1_07630W_A	orf19.2782	114.031	107.497	149.462	150.976	0.439573	0.392754	Ortholog(s) have 2 iron, 2 sulfur cluster binding, glutathione disulfide oxidoreductase activity
C1_07640C_A	orf19.2781	14.3357	16.4545	5.00746	6.09934	-1.47103	0.00156339	Protein with predicted serine/threonine kinase and tyrosine kinase domains; possibly an essential gene, disruptants not obtained by UAU1 method; Spider biofilm induced
C1_07650W_A	orf19.2779	19.4825	18.617	37.7885	39.8083	1.02623	0.0809704	Protein of unknown function; Hap43-repressed gene
C1_07660W_A	orf19.2778	15.5739	13.5957	13.6119	55.3961	1.24229	0.0114985	Protein of unknown function; transcript is upregulated in clinical isolates from HIV+ patients with oral candidiasis
C1_07690C_A	orf19.1229	34.3865	27.1906	38.427	89.1489	1.05089	0.0225887	Ortholog(s) have nuclear export signal receptor activity, role in protein export from nucleus and nuclear envelope, nuclear periphery localization
C1_07780W_A	orf19.4713	29.0403	34.5443	25.51	19.643	-0.493857	0.330191	Ortholog of C. dubliniensis CD36 : Cd36_07300, C. parapsilosis CDC317 : CPAR2_208300, Candida tenuis NRRL Y-1498 : CANTEDRAFT_95879 and Debaryomyces hansenii CBS767 : DEHA2F26246g
C1_07790C_A	orf19.5049	105.823	70.0016	64.6938	138.404	0.20804	0.765578	Putative U3-containing 90S preribosome processome complex subunit; Hap43-induced gene; rat catheter and Spider biofilm induced; F-12/CO2 early biofilm induced
C1_07810C_A	orf19.5051	11.1894	9.91465	11.9949	16.6943	0.442988	0.424086	Has domain(s) with predicted protein heterodimerization activity
C1_07820W_A	orf19.5052	9.9883	10.0523	9.36134	8.86557	-0.136859	0.889323	Ortholog of S. cerevisiae : YFR045W, C. glabrata CBS138 : CAGL0C02013g, C. dubliniensis CD36 : Cd36_07340, C. parapsilosis CDC317 : CPAR2_208340 and Candida tenuis NRRL Y-1498 : CANTEDRAFT_116470
C1_07830C_A	orf19.5053	14.676	11.198	15.7868	16.6306	0.325262	0.684264	Ortholog(s) have acetyltransferase activity, chromatin binding activity
C1_07840W_A	orf19.5054	67.365	78.3908	64.3449	68.6024	-0.132699	0.860845	Putative quinolinate phosphoribosyl transferase, involved in NAD biosynthesis; Hap43p-repressed gene
C1_07850C_A	orf19.5056	2.95971	4.3991	6.22305	4.70465	0.570445	0.483507	Ortholog(s) have enzyme regulator activity, ubiquitin protein ligase activity and role in anaphase-promoting complex-dependent catabolic process, chromatin assembly, positive regulation of ubiquitin protein ligase activity
C1_07860W_A	orf19.5057	2.58495	3.08716	3.87823	1.81578	0.00556057	0.99224	Ortholog of C. dubliniensis CD36 : Cd36_07380 and Candida albicans WO-1 : CAWG_00634
C1_07920W_A	orf19.5064.1	1699.24	1241.74	1134.53	1147.83	-0.365771	0.518527	Ortholog of C. dubliniensis CD36 : Cd36_07450, C. parapsilosis CDC317 : CPAR2_208450, Candida tenuis NRRL Y-1498 : CANTEDRAFT_116488 and Debaryomyces hansenii CBS767 : DEHA2F26114g
C1_07950C_A	orf19.5066	69.7834	49.2216	34.4112	99.3293	0.168414	0.820106	Putative pre-60S pre-ribosomal particle subunit; essential gene; S. cerevisiae ortholog RRP17 is essential; Hap43p-induced; rat catheter biofilm induced
C1_07960W_A	orf19.5067	56.0315	45.6342	33.2761	65.8719	-0.0361779	0.969801	Predicted nuclear exosome-associated nucleic acid binding protein; rat catheter and Spider biofilm induced
C1_07980C_A	orf19.5069	254.15	206.579	352.753	190.498	0.237703	0.72322	Ortholog of S. cerevisiae Sae3; meiosis specific protein involved in DMC1-dependent meiotic recombination in S. cerevisiae; Spider biofilm induced
C1_07990C_A	orf19.5070	39.336	31.0246	38.202	30.1174	-0.0424725	0.961257	Similar to cell-wall mannoproteins; induced in low iron; induced in cyr1 homozygous null; regulated by osmotic and oxidative stress via Hog1; Spider biofilm induced
C1_08040W_A	orf19.5076.1	640.951	442.838	456.854	335.294	-0.452241	0.431248	Ortholog of C. parapsilosis CDC317 : CPAR2_804320, Candida tenuis NRRL Y-1498 : CANTEDRAFT_114112, Debaryomyces hansenii CBS767 : DEHA2G14938g and Candida orthopsilosis Co 90-125 : CORT_0A04360
C1_08050W_A	orf19.5077	370.424	378.585	298.375	274.189	-0.387546	0.476056	Protein of unknown function; Hap43-repressed gene; repressed by nitric oxide
C1_08080C_A	orf19.5079.1	606.613	500.378	342.077	369.735	-0.637076	0.164539	Ortholog(s) have role in NADH oxidation, programmed cell death and mitochondrial respiratory chain complex I, membrane segment localization
C1_08110W_A	orf19.5085	67.0663	78.622	73.1657	99.6346	0.246221	0.71789	Ortholog(s) have nuclear import signal receptor activity, nuclear localization sequence binding, protein transporter activity
C1_08140W_A	orf19.5090	15.7959	15.4768	17.1208	14.1097	-0.00194603	0.996598	Ortholog(s) have tRNA-specific adenosine deaminase activity, tRNA-specific adenosine-34 deaminase activity, role in tRNA wobble adenosine to inosine editing and tRNA-specific adenosine-34 deaminase complex localization
C1_08150C_A	orf19.5092	4.88391	9.3763	6.03377	2.84936	-0.682854	0.776583	Has domain(s) with predicted kinetochore localization
C1_08160W_A	orf19.5093	49.9652	56.2586	51.8622	58.6482	0.0570749	0.945329	Ortholog(s) have DNA translocase activity
C1_08180C_A	orf19.5095	91.5883	97.4801	89.9059	74.9258	-0.197915	0.789019	Putative oxysterol-binding protein; caspofungin induced; possibly an essential gene, disruptants not obtained by UAU1 method
C1_08240C_A	orf19.5103	3.73933	5.43387	22.2511	18.124	2.13797	0.000848373	Protein with a predicted phosphoglycerate mutase family domain; Hap43-repressed; clade-associated gene expression; induced by hypoxia
C1_08340C_A	orf19.5114	174.885	165.035	97.5624	39.91	-1.30605	0.00445302	Sorting nexin; role in maintaining late-Golgi resident enzymes in their proper location by recycling molecules from the prevacuolar compartment; Spider biofilm induced
C1_08350C_A	orf19.5114.1	18808.8	14879.2	6795.92	3952.33	-1.64814	0.000848373	Ortholog of C. dubliniensis CD36 : Cd36_02630, C. parapsilosis CDC317 : CPAR2_206910, Candida tenuis NRRL Y-1498 : cten_CGOB_00051 and Pichia stipitis Pignal : psti_CGOB_00173
C1_08390C_A	orf19.384	17.4644	21.0117	24.6956	20.1264	0.220246	0.733844	Ortholog of S. cerevisiae : YPL247C, C. glabrata CBS138 : CAGL0H00781g, C. dubliniensis CD36 : Cd36_07900, C. parapsilosis CDC317 : CPAR2_207070 and Candida tenuis NRRL Y-1498 : CANTEDRAFT_121354
C1_08440C_A	orf19.389	18.9403	21.1337	11.8343	8.50012	-0.978743	0.352534	Protein of unknown function; Hap43-induced gene
C1_08470W_A	orf19.392	126.233	107.777	89.7446	46.2386	-0.783143	0.131554	Ortholog(s) have role in mitochondrial respiratory chain complex III assembly and integral component of mitochondrial membrane localization
C1_08490W_A	orf19.394	38.9364	39.8969	38.8911	23.5496	-0.336318	0.561093	Putative kynureninase; predicted role in NAD biosynthesis; Hap43-repressed gene; flow model biofilm induced
C1_08520C_A	orf19.397	144.616	138.166	154.65	160.929	0.15831	0.823868	Ortholog(s) have structural constituent of ribosome activity and mitochondrial large ribosomal subunit localization
C1_08530W_A	orf19.398	13.1164	13.1718	22.1276	19.4252	0.66053	0.430022	Ortholog of C. dubliniensis CD36 : Cd36_08040, C. parapsilosis CDC317 : CPAR2_207180, Candida tenuis NRRL Y-1498 : CANTEDRAFT_114140 and Debaryomyces hansenii CBS767 : DEHA2G13992g
C1_08540C_A	orf19.399	124.589	75.0019	178.543	146.311	0.702746	0.174944	Putative serine/threonine protein kinase; possibly an essential gene, disruptants not obtained by UAU1 method
C1_08610C_A	orf19.409	3397.74	2449.31	2772.43	2776.07	-0.0756094	0.934106	Ortholog of S. cerevisiae Aim38/Rcf2, cytochrome c oxidase subunit; plasma membrane localized; Hap43-repressed; induced in oralpharyngeal candidasis; flow model biofilm induced; Spider biofilm repressed
C1_08630W_A	orf19.4721	81.8977	68.1418	65.3548	102.137	0.158747	0.82533	Ortholog(s) have RNA binding activity, role in mRNA processing, mitochondrial translation and mitochondrion localization
C1_08660C_A	orf19.4724	18.1089	16.9681	13.8864	19.6729	-0.0638143	0.953822	Ortholog(s) have RNA binding activity, role in spliceosomal complex assembly and U2-type prespliceosome localization
C1_08680C_A	orf19.4726	32.0467	44.4212	59.8539	51.0063	0.535816	0.332076	Ortholog(s) have 1-phosphatidylinositol 4-kinase activator activity, calcium ion binding activity
C1_08690W_A	orf19.4727	137.724	137.486	71.3209	54.5437	-1.12866	0.0141975	Ortholog(s) have role in mitochondrial respiratory chain complex II assembly, protein-FAD linkage, tricarboxylic acid cycle and mitochondrial matrix localization
C1_08700W_A	orf19.4728	64.0582	60.527	75.1741	80.1835	0.318461	0.608644	Ortholog(s) have role in histone deacetylation, negative regulation of meiotic nuclear division and Set3 complex localization
C1_08710W_A	orf19.4730	38.539	59.9798	48.2696	80.6104	0.387558	0.625551	Ortholog of S. cerevisiae : YNL050C, C. glabrata CBS138 : CAGL0G01276g, C. dubliniensis CD36 : Cd36_08220, C. parapsilosis CDC317 : CPAR2_804440 and Candida tenuis NRRL Y-1498 : CANTEDRAFT_94168
C1_08730W_A	orf19.4731	25.0103	46.0434	27.9299	21.2824	-0.529891	0.29677	Ortholog(s) have role in intra-Golgi vesicle-mediated transport, protein localization by the Cvt pathway and Golgi transport complex localization
C1_08760W_A	orf19.4734	12.8334	16.4392	14.0127	12.2826	-0.154742	0.862766	Protein of unknown function; Hap43-repressed
C1_08770W_A	orf19.4735	144.144	140.779	56.1726	44.69	-1.49818	0.000848373	Ornithine cyclodeaminase family protein; Sef1, Sfu1, and Hap43-regulated; ortholog of S. cerevisiae YGL159W and S. pombe SPAP11E10.01; rat catheter biofilm induced
C1_08780W_A	orf19.4736	46.6493	62.8666	45.2446	35.9769	-0.431208	0.410839	Ortholog(s) have alkaline phosphatase activity, role in nicotinamide nucleotide metabolic process, protein dephosphorylation and extracellular region, fungal-type vacuole membrane localization
C1_08800W_A	orf19.4738	13.6991	17.9593	18.8596	14.4962	0.075346	0.932018	Ortholog(s) have role in protein folding in endoplasmic reticulum and integral component of endoplasmic reticulum membrane localization
C1_08820C_A	orf19.4740	32.1895	34.8607	32.4897	34.6707	0.00236756	0.997581	Ortholog(s) have aminoacyl-tRNA hydrolase activity and role in mitochondrial translation
C1_08830C_A	orf19.4741	14.0887	10.7618	7.82326	9.8112	-0.494876	0.680556	Protein of unknown function; C. albicans- and C. dubliniensis specific gene; rat catheter biofilm repressed
C1_08840W_A	orf19.4742	9.7315	8.50143	18.9187	17.7154	1.00664	0.0780422	Putative SH3-domain-containing protein
C1_08860C_A	orf19.4744	10.9523	14.1395	16.1649	13.9846	0.264915	0.667751	Putative phosphatidylinositol 3-phosphate (PI3P) phosphatase; repressed by alpha pheromone in SpiderM medium
C1_08890C_A	orf19.4748	24.5855	15.7939	18.3814	17.3779	-0.1753	0.891493	Putative U2B'' component of the U2 snRNP, involved in splicing; contains an RNA recognition motif (RRM); ortholog of S. cerevisiae MSL1; Hap43p-induced gene
C1_08900W_A	orf19.4749	15.1411	18.1723	18.1224	11.3899	-0.174789	0.812447	Protein of unknown function; hyphal-induced expression, regulated by Cyr1, Ras1, Efg1; Hap43-induced gene; Spider biofilm induced
C1_08910C_A	orf19.4750	4.78473	8.14893	7.76695	10.5915	0.505316	0.42036	Ortholog of C. dubliniensis CD36 : Cd36_08410, C. parapsilosis CDC317 : CPAR2_301700, Candida tenuis NRRL Y-1498 : cten_CGOB_00267 and Debaryomyces hansenii CBS767 : DEHA2C10560g
C1_08920W_A	orf19.4751	57.2826	60.2355	59.1409	83.7661	0.282194	0.634865	Ortholog(s) have structural constituent of ribosome activity and mitochondrial small ribosomal subunit localization
C1_08930C_A	orf19.4751.1	403.771	302.731	374.577	228.091	-0.229329	0.771466	Has domain(s) with predicted NADH dehydrogenase (ubiquinone) activity, role in electron transport chain and mitochondrial respiratory chain complex I localization
C1_09000W_A	orf19.4756	11.5404	12.5301	12.2771	11.9485	0.009266	0.991344	Ortholog of S. cerevisiae : YTP1, C. dubliniensis CD36 : Cd36_08490, C. parapsilosis CDC317 : CPAR2_801590, Candida tenuis NRRL Y-1498 : CANTEDRAFT_109732 and Debaryomyces hansenii CBS767 : DEHA2C10384g
C1_09020W_A	orf19.4758	129.824	142.727	120.669	126.766	-0.139478	0.847259	Putative reductase or dehydrogenase; Hap43-repressed gene; alkaline repressed
C1_09040C_A	orf19.4760	101.817	89.3056	87.4763	204.941	0.613534	0.227905	Putative protein-histidine N-methyltransferase; Spider biofilm induced
C1_09060C_A	orf19.4763	10.887	7.89278	24.2863	20.9872	1.26949	0.0462501	Protein of unknown function; possibly membrane bound; mutants are viable; rat catheter biofilm repressed
C1_09070W_A	orf19.4764	16.9521	18.5899	14.1273	11.8267	-0.453566	0.374382	Ortholog(s) have poly(A)-specific ribonuclease activity, role in nuclear-transcribed mRNA poly(A) tail shortening, postreplication repair and PAN complex localization
C1_09110W_A	orf19.4768	5.42553	9.1642	9.36098	19.1063	0.96435	0.0743374	Protein of unknown function; Spider biofilm induced
C1_09130W_A	orf19.4771	74.7904	43.471	107.763	195.521	1.35869	0.00219792	Protein of unknown function; Spider biofilm induced
C1_09210C_A	orf19.4779	46.6609	41.4083	36.9807	28.7296	-0.422518	0.432454	Putative transporter; slightly similar to the Sit1p siderophore transporter; Gcn4p-regulated; fungal-specific; induced by Mnl1p under weak acid stress
C1_09220W_A	orf19.4780	26.829	35.3014	47.2564	37.0718	0.440715	0.406576	Predicted MFS family membrane transporter, member of the drug:proton antiporter (12 spanner) (DHA1) family; Spider biofilm induced
C1_09240C_A	orf19.4783	4.73573	1.71275	2.96447	2.34219	-0.281155	0.818558	Protein of unknown function; induced during chlamydospore formation in both C. albicans and C. dubliniensis
C1_09280W_A	orf19.4787	21.0612	24.1291	25.7495	30.2888	0.310399	0.597047	Ortholog of S. cerevisiae : JJJ2, C. glabrata CBS138 : CAGL0I06226g, C. dubliniensis CD36 : Cd36_08750, C. parapsilosis CDC317 : CPAR2_803690 and Candida tenuis NRRL Y-1498 : CANTEDRAFT_136187
C1_09300C_A	orf19.4789	1.53934	0.909315	4.85276	1.79615	1.44113	0.28317	Has domain(s) with predicted metal ion binding activity
C1_09310C_A	orf19.4791	10.1254	17.5221	21.9329	22.2663	0.676866	0.134297	Protein of unknown function; Spider biofilm induced
C1_09320C_A	orf19.4792	755.391	636.189	562.755	673.958	-0.170213	0.836105	Protein with a regulator of G-protein signaling domain; Plc1-regulated; Spider biofilm induced; rat catheter biofilm repressed
C1_09330W_A	orf19.4793	316.239	242.975	104.68	262.444	-0.607134	0.227174	Putative ribosome-associated protein; ortholog of S. cerevisiae Tma16; Hap43-induced gene; Spider biofilm induced
C1_09340C_A	orf19.4795	6.80009	7.89647	11.0327	7.97958	0.371456	0.520272	Protein of unknown function; Sef1-, Sfu1-, and Hap43 regulated; Spider biofilm induced
C1_09350W_A	orf19.4796	164.604	175.918	143.661	190.414	-0.027577	0.974983	Putative eIF-4E-binding repressor of CAP-dependent translation; stationary phase enriched protein
C1_09360C_A	orf19.4798	68.7343	73.8515	65.7062	60.0533	-0.181163	0.79945	Ortholog(s) have role in protein localization to plasma membrane and plasma membrane localization
C1_09390W_A	orf19.4801	19.2725	19.3539	18.7954	30.2589	0.344791	0.551842	Ortholog(s) have tRNA binding, tRNA dimethylallyltransferase activity, role in tRNA modification, transfer RNA gene-mediated silencing and cytosol, mitochondrion, nucleolus localization
C1_09410W_A	orf19.4803	7.454	0	1.03926	4.37922	-0.460128	0.876345	Ortholog of Candida albicans WO-1 : CAWG_00488
C1_09430W_A	orf19.4805	39.1368	45.976	33.8615	53.5667	0.0387248	0.966311	Putative membrane protein; induced by alpha pheromone in SpiderM medium; Hap4-induced gene; Spider biofilm induced
C1_09440W_A	orf19.4807	22.9598	24.4131	42.4896	37.9599	0.764022	0.103888	Ortholog(s) have inorganic diphosphatase activity, role in aerobic respiration and mitochondrion localization
C1_09470C_A	orf19.4811	73.551	75.5889	71.0788	65.503	-0.126901	0.864303	Putative tricarboxylate carrier family protein; localized to the mitochondrial membrane
C1_09500W_A	orf19.4814	0	0	0	0	0	1	Ortholog of C. dubliniensis CD36 : Cd36_08960, C. parapsilosis CDC317 : CPAR2_301680, Candida tenuis NRRL Y-1498 : cten_CGOB_00021 and Debaryomyces hansenii CBS767 : DEHA2F11088g
C1_09520C_A	orf19.4816	40.0567	41.3329	42.7977	35.2696	-0.0601244	0.945684	Protein of unknown function; induced by nitric oxide
C1_09540W_A	orf19.4818	120.319	127.874	73.7322	99.6182	-0.517774	0.316518	Protein of unknown function; Spider biofilm induced
C1_09550W_A	orf19.4819	49.9701	61.9884	44.8029	49.0607	-0.254326	0.778431	Protein of unknown function; transcript detected on high-resolution tiling arrays; rat catheter biofilm induced
C1_09570W_A	orf19.4820	30.1874	32.9381	39.6648	40.7772	0.349726	0.51991	Ortholog of S. cerevisiae : YKL162C, C. dubliniensis CD36 : Cd36_09010, C. parapsilosis CDC317 : CPAR2_214170, Candida tenuis NRRL Y-1498 : CANTEDRAFT_95066 and Debaryomyces hansenii CBS767 : DEHA2E18942g
C1_09610W_A	orf19.4824	20.917	24.3154	24.1331	16.897	-0.140675	0.876345	Planktonic growth-induced gene
C1_09620C_A	orf19.4825	109.456	88.971	71.1006	64.6705	-0.54743	0.307615	Mitochondrial matrix protein; required for assembly/stability of the F1 sector of mitochondrial F1F0 ATP synthase at high temperature; rat catheter biofilm repressed
C1_09650W_A	orf19.4828	112.043	104.168	163.578	122.932	0.406143	0.46802	WD repeat domain protein; Hap43-repressed gene; flow model biofilm induced
C1_09670C_A	orf19.4830	53.4254	88.2593	59.0215	38.7687	-0.534921	0.468498	Has domain(s) with predicted DNA binding activity, role in DNA recombination, DNA repair, DNA replication and nucleus localization
C1_09700W_A	orf19.4834	1.88461	0.834954	2.16774	0.951503	0.197824	0.938984	Ortholog of C. dubliniensis CD36 : Cd36_09140, C. parapsilosis CDC317 : CPAR2_804920, Debaryomyces hansenii CBS767 : DEHA2B10516g and Pichia stipitis Pignal : PICST_30058
C1_09710C_A	orf19.4835	161.958	130.172	125.308	213.24	0.21275	0.763407	Ortholog(s) have role in endonucleolytic cleavage in 5'-ETS of tricistronic rRNA transcript (SSU-rRNA, 5.8S rRNA and LSU-rRNA), more
C1_09740C_A	orf19.4837.1	18.5452	73.9464	92.4362	54.9305	0.672015	0.588232	Ortholog of C. parapsilosis CDC317 : CPAR2_804880, Candida tenuis NRRL Y-1498 : CANTEDRAFT_111283, Debaryomyces hansenii CBS767 : DEHA2B10604g and Pichia stipitis Pignal : PICST_40454
C1_09750W_A	orf19.4839	50.4078	47.0796	49.6233	43.884	-0.0601364	0.943116	GET complex subunit; expression downregulated in an ssr1 null mutant
C1_09770W_A	orf19.4842	56.9033	63.9667	123.741	89.876	0.821568	0.14401	Protein of unknown function; Spider biofilm induced
C1_09780C_A	orf19.4843	84.4735	65.1921	91.0776	69.3393	0.100083	0.899505	Putative iron/copper reductas; involved in iron homeostasis; rat catheter and Spider biofilm induced
C1_09790C_A	orf19.4844	68.4008	52.1722	68.2061	84.198	0.337995	0.554453	Ortholog(s) have ATP-dependent 3'-5' RNA helicase activity, RNA binding, polynucleotide adenylyltransferase activity, protein binding, bridging activity
C1_09810W_A	orf19.4846	37.5563	32.0402	29.1091	38.1171	-0.049993	0.955931	GlcNAc-induced protein
C1_09820C_A	orf19.4847	22.1202	21.8205	16.0331	21.814	-0.215374	0.931579	Ortholog of Candida albicans WO-1 : CAWG_00450
C1_09840C_A	orf19.4849	206.523	180.181	162.544	265.709	0.147233	0.846684	Protein required for localizing proteasomes to the nucleus; involved in ubiquitin-mediated protein degradation; possibly an essential gene, disruptants not obtained by UAU1 method; Spider biofilm induced
C1_09850C_A	orf19.4850	167.082	141.065	101.422	79.6399	-0.767141	0.0943563	Ortholog of S. cerevisiae : CUB1, C. dubliniensis CD36 : Cd36_09270, C. parapsilosis CDC317 : CPAR2_803450, Candida tenuis NRRL Y-1498 : CANTEDRAFT_131760 and Debaryomyces hansenii CBS767 : DEHA2B10472g
C1_09910C_A	orf19.4857	18.0386	26.1859	32.0794	58.287	1.03094	0.0304514	Protein with a dual-specificity phosphatase domain; Hap43-induced gene
C1_09930W_A	orf19.4861	10.2709	8.7574	6.24134	6.57494	-0.570169	0.500872	Protein of unknown function; rat catheter biofilm repressed
C1_09940W_A	orf19.4861.1	73.5887	79.6954	59.5646	40.7313	-0.611945	0.68661	Protein of unknown function
C1_09950C_A	orf19.4862	39.9444	55.8851	45.8304	38.8181	-0.178986	0.841493	Putative integral membrane protein; S. cerevisiae ortholog Tvp23 localizes to late Golgi vesicles; rat catheter biofilm induced
C1_09980C_A	orf19.4864	72.0373	71.9199	44.803	46.5272	-0.656477	0.14452	Ortholog(s) have acylglycerol lipase activity, role in triglyceride metabolic process and lipid droplet, membrane localization
C1_10050W_A	orf19.4872	0.7285	0.161377	3.91042	2.64821	2.88172	0.287336	Protein of unknown function; induced by Mnl1 under weak acid stress; Hap43-induced; mutant is viable
C1_10060C_A	orf19.4873	64.1776	66.0057	83.7793	71.2847	0.252319	0.704547	Protein of unknown function; transcript regulated by white-opaque switch; flow model biofilm induced; Spider biofilm induced
C1_10080W_A	orf19.4875	93.1933	68.2633	49.8652	52.8651	-0.652284	0.217151	Ortholog(s) have role in mRNA splicing, via spliceosome and U2-type spliceosomal complex localization
C1_10090C_A	orf19.4878	29.9158	35.2098	32.7496	19.447	-0.319269	0.584306	Protein of unknown function; Hap43-repressed; rat catheter biofilm repressed
C1_10110W_A	orf19.4880	2.28198	3.67155	6.81532	6.06384	1.11322	0.068273	Protein of unknown function; flow model biofilm induced
C1_10120C_A	orf19.4882	111.128	100.556	122.889	146.591	0.34826	0.535656	TFIIE small subunit; involved in RNA polymerase II transcription initiation; Spider biofilm induced
C1_10140C_A	orf19.4883	127.487	102.6	67.5083	102.703	-0.43485	0.43492	Protein of unknown function; S. cerevisiae ortholog Cos111 confers resistance to the antifungal drug ciclopirox olamine; constitutive expression independent of MTL or white-opaque status; Spider biofilm induced
C1_10170W_A	orf19.4886	54.5251	34.4514	21.3467	20.815	-1.07749	0.0334358	Putative adhesin-like protein; Hap43-repressed; rat catheter and Spider biofilm induced
C1_10190W_A	orf19.4888	97.9734	76.8528	60.4762	57.8069	-0.563677	0.252702	Has domain(s) with predicted nucleic acid binding, nucleotide binding activity
C1_10200C_A	orf19.4889	39.563	31.9548	81.5039	158.814	1.74857	0.000848373	Predicted MFS family membrane transporter, member of the drug:proton antiporter (12 spanner) (DHA1) family; Spider biofilm induced
C1_10230C_A	orf19.4893	21.4127	25.9234	32.0273	27.1254	0.321505	0.580142	Ortholog of C. dubliniensis CD36 : Cd36_09630, C. parapsilosis CDC317 : CPAR2_805080, Candida tenuis NRRL Y-1498 : CANTEDRAFT_136811 and Debaryomyces hansenii CBS767 : DEHA2B12364g
C1_10240C_A	orf19.4894	44.4527	67.9453	32.2126	20.1092	-1.10313	0.0180474	Protein with similarity to S. cerevisiae Yer010cp, a protein of unknown function belonging to the prokaryotic RraA family; repressed by benomyl; Hap43-induced; Spider biofilm induced
C1_10250C_A	orf19.4895	38.3845	40.611	34.9989	35.6354	-0.161402	0.831465	Ortholog of C. dubliniensis CD36 : Cd36_09650, C. parapsilosis CDC317 : CPAR2_805060, Candida tenuis NRRL Y-1498 : CANTEDRAFT_95780 and Debaryomyces hansenii CBS767 : DEHA2B12320g
C1_10280C_A	orf19.4898	104.668	94.25	223.28	131.438	0.834501	0.0562976	Putative protein of unknown function; induced by prostaglandins
C1_10310W_A	orf19.4901	11.219	11.5767	19.275	10.21	0.371221	0.608822	Predicted methyltransferase; Spider biofilm induced
C1_10320W_A	orf19.4903	15.4882	16.6385	17.8676	19.0441	0.200306	0.79936	Ortholog(s) have N-acetylglucosaminylphosphatidylinositol deacetylase activity
C1_10330C_A	orf19.4904	7.05762	9.38042	15.6788	13.0793	0.806928	0.153352	Ortholog(s) have nucleosome binding activity, role in chromatin silencing at telomere, histone exchange and Swr1 complex, cytoplasm, nuclear chromosome, telomeric region, nuclear periphery localization
C1_10340W_A	orf19.4905	17.6571	19.5958	19.2374	12.4983	-0.231243	0.736345	Putative MFS transporter; Hap43p-induced gene; also regulated by regulated by Sef1p and Sfu1p; repressed in a ssr1 null mutant
C1_10350C_A	orf19.4906	97.1846	73.9321	90.745	106.746	0.206803	0.769787	Putative adhesin-like protein; positively regulated by Tbf1; Spider biofilm induced
C1_10360C_A	orf19.4907	37.7964	36.4762	107.901	61.0056	1.18532	0.00495977	Putative protein of unknown function; Hap43p-repressed gene; increased transcription is observed upon fluphenazine treatment; possibly transcriptionally regulated by Tac1p; induced by nitric oxide; fungal-specific (no human/murine homolog
C1_10370W_A	orf19.4908	1.77208	0	2.71774	3.57876	1.82911	0.567359	Dubious open reading frame
C1_10410W_A	orf19.4911	20.2132	16.6705	22.8923	20.9757	0.250186	0.738076	BED zinc finger protein; predicted DNA binding protein; Spider biofilm repressed
C1_10420C_A	orf19.4912	8.45316	12.8058	24.3078	27.2591	1.27838	0.00392336	Ortholog(s) have ubiquitin protein ligase binding activity, role in positive regulation of receptor internalization, protein ubiquitination, ubiquitin-dependent endocytosis and Golgi apparatus, cytosol, plasma membrane localization
C1_10440W_A	orf19.985	66.4077	60.8793	79.5966	120.866	0.655249	0.189679	Ortholog of S. cerevisiae : YEL043W, C. glabrata CBS138 : CAGL0L01221g, C. dubliniensis CD36 : Cd36_09830, C. parapsilosis CDC317 : CPAR2_804210 and Candida tenuis NRRL Y-1498 : cten_CGOB_00007
C1_10460W_A	orf19.988	33.6022	37.1923	28.8449	22.79	-0.455289	0.390884	Protein of unknown function; oral infection upregulated gene; upregulated in strains from HIV+ patients with oral candidiasis; mutants have reduced ability to damage oral epithelial cells; transcript possibly regulated upon hyphal formation
C1_10470W_A	orf19.989	130.882	122.839	105.522	132.898	-0.0897389	0.915	Mitochondrial ribosomal protein of the small subunit; Spider biofilm repressed
C1_10500W_A	orf19.993	82.3701	70.0539	64.5733	46.637	-0.454799	0.426197	Protein of unknown function; rat catheter biofilm repressed
C1_10510W_A	orf19.994	20.528	25.7684	34.1064	21.2812	0.258662	0.772684	Protein of unknown function; induced by Mnl1 under weak acid stress; flow model biofilm repressed
C1_10520W_A	orf19.996	5.57836	8.61833	10.5295	8.8392	0.448176	0.490623	Protein with a predicted leucine-rich repeat domain; possibly an essential gene, disruptants not obtained by UAU1 method
C1_10540C_A	orf19.998	25.6156	28.2372	21.1742	12.9066	-0.660066	0.172962	Putative adapter protein; links synaptojanins Inp52 and Inp53 to the cortical actin cytoskeleton in S. cerevisiae; mutants are viable
C1_10560C_A	orf19.1002	10.7594	15.7243	16.6082	10.2718	0.0214322	0.980288	Protein of unknown function; Hap43-repressed gene
C1_10570C_A	orf19.1005	6.76409	5.99352	3.4955	2.01934	-1.20997	0.0556749	Protein with predicted RNI-like domains; rat catheter biofilm induced
C1_10580C_A	orf19.1830	1669.77	1114.47	1281.81	1209.14	-0.160587	0.832964	Protein of unknown function; Hap43-induced; rat catheter and Spider biofilm induced
C1_10600C_A	orf19.1831	2.69531	0	0	0	#N/A	1	Dubious open reading frame
C1_10620W_A	orf19.1833	327.973	313.859	241.311	443.142	0.0927568	0.921011	Ortholog(s) have pseudouridine synthase activity
C1_10630C_A	orf19.1834	3.21948	4.09302	8.37236	7.53834	1.12156	0.0373369	Has domain(s) with predicted role in mitotic sister chromatid cohesion
C1_10680C_A	orf19.1840	118.812	158.171	85.7566	60.6464	-0.919853	0.0581062	Predicted lipid-binding ER protein; involved in ER-plasma membrane tethering; Spider biofilm induced
C1_10690W_A	orf19.2352	21.4292	28.8888	13.6154	16.3215	-0.749145	0.153233	Ortholog(s) have mitochondrion localization
C1_10710C_A	orf19.2350	7.12028	10.6947	5.39342	5.0504	-0.770445	0.208158	Protein similar to S. cerevisiae Yor378w; MFS family transporter; transposon mutation affects filamentous growth; null mutants are viable; fungal-specific (no human or murine homolog)
C1_10730W_A	orf19.2346	39.7583	42.112	38.448	31.3185	-0.230806	0.722508	Putative protein of unknown function, transcription is positively regulated by Tbf1p
C1_10750C_A	orf19.2343.1	2.3067e-05	12.0782	2.82411	0.552997	-1.83854	0.817639	Putative vacuolar H+ ATPase subunit e of the V-ATPase V0 subcomplex; added to Assembly 21 based on comparative genome analysis
C1_10810W_A	orf19.2336	3.20576	5.42287	0.670433	1.41253	-2.05049	0.751997	Pry family pathogenesis-related protein; predicted to be extracellular
C1_10820C_A	orf19.2335	25.215	27.3797	27.6322	20.8874	-0.116349	0.884388	Putative aspartyl aminopeptidase; stationary phase enriched protein; mutation confers hypersensitivity to 5-fluorouracil (5-FU); Hog1-induced; planktonic growth-induced; rat catheter and Spider biofilm repressed
C1_10840C_A	orf19.2333	441.858	545.806	535.066	291.017	-0.257736	0.723859	Ortholog(s) have role in retrograde transport, endosome to Golgi and late endosome localization
C1_10850W_A	orf19.2332	0.99847	0.353889	0.765651	0.483945	-0.114016	1	Ortholog of C. parapsilosis CDC317 : CPAR2_210560, C. dubliniensis CD36 : Cd36_10180, Candida orthopsilosis Co 90-125 : CORT_0A09890 and Candida tropicalis MYA-3404 : CTRG_04072
C1_10880W_A	orf19.2330	108.823	107.054	127.533	226.885	0.715245	0.282923	Putative U3 snoRNA-associated protein; Hap43-induced; transposon mutation affects filamentous growth; repressed by prostaglandins
C1_10890C_A	orf19.2328	108.695	116.798	110.943	114.915	0.00233388	0.998323	Ortholog of C. dubliniensis CD36 : Cd36_10220, C. parapsilosis CDC317 : CPAR2_210530, Candida tenuis NRRL Y-1498 : CANTEDRAFT_105553 and Debaryomyces hansenii CBS767 : DEHA2G14432g
C1_10910C_A	orf19.2326	44.8876	38.1897	44.5957	44.4707	0.100426	0.900971	Ortholog(s) have role in chromatin silencing at silent mating-type cassette, double-strand break repair via homologous recombination, intra-S DNA damage checkpoint and mitotic sister chromatid cohesion, more
C1_10920W_A	orf19.2325	15.1222	15.1034	10.9928	14.3342	-0.255094	0.713538	Ortholog(s) have RNA polymerase III general transcription initiation factor activity and RNA polymerase III transcription regulator recruiting activity, more
C1_10950C_A	orf19.2320	83.38	74.2903	80.7189	143.065	0.505193	0.333203	Putative serine/threonine-protein kinase; possibly an essential gene, disruptants not obtained by UAU1 method
C1_10960W_A	orf19.2318.1	29.7459	35.2846	32.3753	24.4166	-0.195431	0.803284	Ortholog(s) have inositol phosphoceramide synthase regulator activity, role in inositol phosphoceramide metabolic process and inositol phosphoceramide synthase complex, integral component of Golgi membrane localization
C1_10970W_A	orf19.2319	147.065	108.304	112.623	216.751	0.367142	0.547941	Putative nucleolar protein with a predicted role in pre-rRNA processing; Hap43-induced gene; repressed in core stress response
C1_10980W_A	orf19.2317	5.72306	8.2405	1.92	4.04526	-1.22701	0.289202	Protein of unknown function; induced by alpha pheromone in SpiderM medium
C1_11000C_A	orf19.2314	711.712	509.121	330.117	749.277	-0.177643	0.814378	Protein with a role in nucleolar integrity and processing of pre-rRNA; mutation confers hypersensitivity to 5-fluorocytosine (5-FC), 5-fluorouracil (5-FU), and tubercidin (7-deazaadenosine); Hap43-induced; Spider biofilm induced
C1_11010C_A	orf19.2313	32.2822	34.7493	25.855	27.1404	-0.338972	0.562332	Putative ortholog of S. cerevisiae Pex32 a peroxisomal integral membrane protein with a role in negative regulation of peroxisome size; Hap43-repressed gene
C1_11020W_A	orf19.2312	120.831	207.582	20.1083	23.6233	-2.90876	0.000848373	Protein similar to ferric reductase Fre10p; possibly an essential gene, disruptants not obtained by UAU1 method
C1_11050W_A	orf19.2310	0.170297	1.50896	5.22351	5.36513	2.65662	0.129112	Predicted single-stranded nucleic acid binding protein; flow model biofilm induced
C1_11080W_A	orf19.2308	613.872	447.078	885.65	981.842	0.815745	0.110614	Putative 6-phosphofructo-2-kinase; catalyzes synthesis of fructose-2,6-bisphosphate; Hap43-repressed; flow model, rat catheter and Spider biofilm induced
C1_11090C_A	orf19.2307	27.3527	32.1447	26.7412	26.9022	-0.149427	0.843487	Ortholog(s) have role in mRNA polyadenylation, pre-mRNA cleavage required for polyadenylation and mRNA cleavage and polyadenylation specificity factor complex, nuclear chromatin localization
C1_11100W_A	orf19.2306	57.0693	48.9974	27.4533	34.6475	-0.77229	0.172848	Ortholog(s) have acireductone dioxygenase (Ni2+-requiring) activity and role in L-methionine salvage from methylthioadenosine
C1_11110C_A	orf19.2305	90.9965	81.2409	55.5055	92.9987	-0.213894	0.789221	Ortholog(s) have tubulin binding activity, role in tubulin complex assembly and cytoplasm, prefoldin complex localization
C1_11120C_A	orf19.2304	110.002	123.2	72.2861	51.9991	-0.907926	0.0361037	Protein similar to S. cerevisiae Gvp36p; transposon mutation affects filamentous growth
C1_11140W_A	orf19.2302	26.7518	31.6332	22.3724	20.481	-0.44619	0.398357	Ortholog(s) have enzyme regulator activity, role in cellular calcium ion homeostasis, glycosphingolipid biosynthetic process and integral component of endoplasmic reticulum membrane localization
C1_11150W_A	orf19.2301	16.792	21.8935	46.7234	32.3617	1.03161	0.0525229	Ortholog(s) have role in proteasome regulatory particle assembly and cytosol, nucleus localization
C1_11160C_A	orf19.2299	79.6855	116.353	91.227	144.154	0.26386	0.743627	Ortholog(s) have protein tag activity, role in cell budding, cellular response to oxidative stress, invasive growth in response to glucose limitation, protein urmylation, tRNA wobble position uridine thiolation and cytosol localization
C1_11200W_A	orf19.2296	150.764	153.855	268.592	163.64	0.504802	0.526216	Predicted mucin-like protein; ketoconazole-induced; fluconazole-repressed; induced in cyr1 mutant; colony morphology-related gene regulation by Ssn6; flow model biofilm induced; Spider biofilm induced
C1_11250W_A	orf19.676	31.3346	26.7086	52.4963	51.4503	0.840642	0.0633215	Microtubule-binding protein of the cortical microtubule; delays exit from mitosis when the spindle is abnormally oriented; Spider biofilm repressed
C1_11260C_A	orf19.675.1	3941.74	3086.22	820.799	2319.51	-1.1622	0.0215971	Putative adhesin-like protein
C1_11270W_A	orf19.675	3044.01	2205.4	2509.74	1722.93	-0.31059	0.717375	Cell wall protein; induced in core stress response and core caspofungin response; iron-regulated; amphotericin B, ketoconazole, and hypoxia induced; regulated by Cyr1, Ssn6; induced in oralpharyngeal candidasis; Spider biofilm repressed
C1_11280W_A	orf19.674	61.7964	56.2873	49.1194	83.4143	0.166551	0.815122	Ortholog(s) have U6 snRNA binding, pre-mRNA binding activity and role in mRNA cis splicing, via spliceosome, spliceosomal snRNP assembly
C1_11290W_A	orf19.673	16.0213	14.8887	19.7767	20.4129	0.378751	0.545714	Has domain(s) with predicted FMN binding, catalytic activity, oxidoreductase activity and role in oxidation-reduction process
C1_11300C_A	orf19.672	22.958	19.0543	31.6886	31.8987	0.597927	0.194625	Ortholog(s) have RNA binding, first spliceosomal transesterification activity, role in mRNA 5'-splice site recognition and U5 snRNP localization
C1_11320C_A	orf19.670.2	18287.4	15855.4	5570.39	4745.1	-1.72677	0.000848373	Protein of unknown function; hypoxia, Hap43-repressed; ketoconazole induced; induced in oralpharyngeal candidasis; 16h flow model biofilm repressed, late-stage flow model biofilm induced; rat catheter and Spider biofilm induced
C1_11370C_A	orf19.666	9.96783	11.7411	25.5396	27.194	1.28043	0.00219792	Essential protein required for the DNA integrity checkpoint pathway; Spider biofilm induced
C1_11390W_A	orf19.664	0.66679	0	0.340874	0.359094	0.0700556	1	Ortholog of C. dubliniensis CD36 : Cd36_10680, Debaryomyces hansenii CBS767 : DEHA2E14058g, Pichia stipitis Pignal : PICST_29620 and Spathaspora passalidarum NRRL Y-27907 : SPAPADRAFT_146037
C1_11410C_A	orf19.8278	159.669	176.097	98.9926	248.36	0.0489449	0.958186	Predicted ORF from original SGTC Assembly 19 annotation, removed from the reduced ORF set by the SGTC; subsequently reinstated in Assembly 21 based on comparative genome analysis
C1_11430W_A	orf19.660	9.81668	14.5772	13.6536	22.4775	0.566722	0.268717	Protein of unknown function; mRNA binds She3
C1_11510C_A	orf19.1169	21.1699	21.4179	58.2713	47.9856	1.31904	0.00280222	Putative DnaJ-like molecular chaperone; Spider biofilm induced
C1_11530C_A	orf19.1167	1.23312	1.42044	3.12045	8.86557	2.17535	0.0298701	Ortholog(s) have sulfonate dioxygenase activity and role in sulfur compound catabolic process
C1_11560C_A	orf19.1163	26.1804	28.9679	33.1199	30.0592	0.196132	0.777031	Has domain(s) with predicted GTP binding activity
C1_11570W_A	orf19.1162.1	8.2269	8.2405	24.9601	29.1836	1.71718	0.0290115	Ortholog of S. cerevisiae : YJR112W-A, C. glabrata CBS138 : CAGL0C04829g, C. dubliniensis CD36 : Cd36_10860, C. parapsilosis CDC317 : CPAR2_203700 and Candida tenuis NRRL Y-1498 : CANTEDRAFT_113016
C1_11580W_A	orf19.1162	108.422	103.876	114.838	113.312	0.103894	0.90535	Protein of unknown function; transcript upregulated by benomyl treatment
C1_11600W_A	orf19.1160	48.1146	61.9479	62.9873	70.8634	0.282302	0.643512	Ortholog(s) have COPII adaptor activity and role in ER to Golgi vesicle-mediated transport, fungal-type cell wall organization, protein glycosylation, protein retention in Golgi apparatus
C1_11610C_A	orf19.1159	22.9381	26.9147	14.2228	13.463	-0.848533	0.0741185	Protein similar to A. nidulans CysA serine O-trans-acetylase; suggests that C. albicans uses an O-acetyl-serine (OAS) pathway of sulfur assimilation; F-12/CO2 early biofilm induced; Spider biofilm induced
C1_11620W_A	orf19.1158	4.61801	3.48571	6.03316	3.59231	0.248274	0.851851	Ortholog of S. cerevisiae Yft2 required for normal ER membrane biosynthesis; Hap43-repressed gene
C1_11670W_A	orf19.1152	1511	1289.22	757.67	452.771	-1.21001	0.012698	Protein of unknown function; induced in core stress response; Gcn2 and Gcn4 regulated; flow model biofilm induced; Spider biofilm induced
C1_11680C_A	orf19.1150.1	360.245	324.438	165.294	66.7891	-1.56079	0.0090511	Ortholog of C. dubliniensis CD36 : Cd36_10990, C. parapsilosis CDC317 : CPAR2_804585, Candida tenuis NRRL Y-1498 : cten_CGOB_00256 and Debaryomyces hansenii CBS767 : DEHA2F10406g
C1_11690W_A	orf19.1150	26.5151	27.7975	57.199	80.4985	1.34214	0.000848373	GATA-like transcription factor; oral infection induced; mutant has reduced capacity to damage oral epithelial cells; regulated by Gcn2 and Gcn4; Spider biofilm induced
C1_11710C_A	orf19.1148	3.41212	1.06709	1.38521	0.648553	-1.1391	0.481268	Ortholog of C. dubliniensis CD36 : Cd36_11020 and Candida albicans WO-1 : CAWG_00266
C1_11720W_A	orf19.1146	62.1211	56.3096	43.2557	23.649	-0.823863	0.209414	Ortholog of Candida albicans WO-1 : CAWG_00265
C1_11730W_A	orf19.1144	50.4167	50.3937	29.5894	23.755	-0.918237	0.0355801	Protein with SEL-1 like protein domain; early-stage flow model biofilm induced
C1_11740W_A	orf19.1143	10.8266	12.7909	11.7152	13.7018	0.105935	0.913558	Ortholog of Pichia stipitis Pignal : PICST_30878, Spathaspora passalidarum NRRL Y-27907 : SPAPADRAFT_60017, Candida guilliermondii ATCC 6260 : PGUG_05223 and Candida tropicalis MYA-3404 : CTRG_01052
C1_11760C_A	orf19.1140	150.675	133.51	78.5252	71.2269	-0.924252	0.0271071	Protein of unknown function; Spider biofilm repressed
C1_11770C_A	orf19.1139	131.487	123.617	196.634	284.6	0.915651	0.0604311	Protein of unknown funtion; S. cerevisiae ortholog Svl3 plays a role in endocytosis and is localized to the bud neck; Spider biofilm induced
C1_11790W_A	orf19.1137	23.5549	12.4341	20.9448	29.9589	0.500213	0.463411	Thymidylate kinase of unknown role; forms a dimer; potential target for antifungal drugs
C1_11800C_A	orf19.1136	13.1173	4.9174	9.67179	11.0038	0.197157	0.899712	Ortholog(s) have AP-2 adaptor complex localization
C1_11850W_A	orf19.5282	122.959	96.1238	123.064	134.335	0.232528	0.728923	Protein of unknown function; Hap43-repressed gene; mRNA binds to She3; repressed in hyphae; Efg1 and Efh1 regulated; 5'-UTR intron; induced by Mnl1 under weak acid stress; rat catheter biofilm induced
C1_11860W_A	orf19.5281	112.643	129.615	82.794	65.0355	-0.712614	0.150615	Predicted essential RNA-binding G protein; ortholog an effector of mating response pathway in S. cerevisiae; mainly associated with nuclear envelope and ER; flow model and Spider biofilm repressed
C1_11880W_A	orf19.5279	163.875	150.938	112.022	159.814	-0.211757	0.751436	Ortholog(s) have structural constituent of ribosome activity and mitochondrial large ribosomal subunit localization
C1_11890W_A	orf19.5278	30.8978	40.433	50.0189	39.5193	0.327978	0.575583	Protein of unknown function; Spider biofilm induced
C1_11900C_A	orf19.5277	96.7211	63.3543	53.3195	77.3847	-0.292446	0.617687	Ortholog(s) have role in DNA recombination, nuclear-transcribed mRNA catabolic process, 3'-5' exonucleolytic nonsense-mediated decay, protein ubiquitination and cytoplasm, nucleolus, polysome localization
C1_11910W_A	orf19.5276	33.3454	23.7375	11.0948	17.4404	-1.00031	0.0345738	Putative nuclear pore-associated protein; Hap43p-induced gene; induced upon low-level peroxide stress; possibly an essential gene, disruptants not obtained by UAU1 method
C1_11920W_A	orf19.5275	16.4287	25.6288	24.6636	11.4021	-0.221735	0.759214	Ortholog(s) have ATPase activator activity, role in late endosome to vacuole transport via multivesicular body sorting pathway, positive regulation of protein oligomerization and endosome membrane, multivesicular body localization
C1_11930W_A	orf19.5274	28.8197	32.6605	41.1958	35.704	0.322859	0.577616	Ortholog of S. cerevisiae : SKG3, C. dubliniensis CD36 : Cd36_11180, C. parapsilosis CDC317 : CPAR2_206250, Debaryomyces hansenii CBS767 : DEHA2E13794g and Pichia stipitis Pignal : PICST_53693
C1_11940C_A	orf19.5271	7.95879	6.37403	8.33294	6.80011	0.0783808	0.938838	Protein of unknown function; Hap43-induced gene
C1_11950W_A	orf19.5270	10.9511	11.491	11.7124	7.56601	-0.219223	0.814127	Protein of unknown function; rat catheter biofilm induced
C1_11960C_A	orf19.5269.1	98.3501	118.988	101.523	36.6685	-0.653268	0.426448	Ortholog of S. cerevisiae : YPR170W-B, C. glabrata CBS138 : CAGL0I06457g, C. dubliniensis CD36 : Cd36_72650, C. parapsilosis CDC317 : CPAR2_805190 and Candida tenuis NRRL Y-1498 : CANTEDRAFT_99722
C1_11970C_A	orf19.5269	8.34394	13.5545	11.6541	10.6722	0.0279134	0.978731	Ortholog of C. dubliniensis CD36 : Cd36_11210, C. parapsilosis CDC317 : CPAR2_805180, Candida tenuis NRRL Y-1498 : CANTEDRAFT_116279 and Debaryomyces hansenii CBS767 : DEHA2B10714g
C1_11990W_A	orf19.5267	278.788	392.797	210.893	145.405	-0.914489	0.0350429	Putative cell wall adhesin-like protein; repressed in core caspofungin response and by alpha pheromone in SpiderM medium; transcript reduced in ace2 mutant; flow model, rat catheter and Spider biofilm repressed
C1_12000C_A	orf19.5266	4.31489	2.31178	1.30812	2.02652	-0.990755	0.30063	Planktonic growth-induced gene
C1_12020W_A	orf19.5264	0	0	1.63114	0	inf	1	Dubious open reading frame
C1_12040W_A	orf19.5262	0	0	0	0	0	1	Ortholog of C. dubliniensis CD36 : Cd36_11270 and Candida albicans WO-1 : CAWG_00238
C1_12060C_A	orf19.5259	11.665	12.9708	17.1885	18.292	0.526265	0.473057	Ortholog of C. dubliniensis CD36 : Cd36_11290, C. parapsilosis CDC317 : CPAR2_805090, Pichia stipitis Pignal : PICST_28850 and Candida guilliermondii ATCC 6260 : PGUG_02709
C1_12070C_A	orf19.5258	7.03659	9.22776	14.245	14.0401	0.798327	0.100202	Protein of unknown function; induced by nitric oxide
C1_12090C_A	orf19.5256	0.614622	1.36151	0.62841	1.324	-0.0174256	1	Protein of unknown function; Hap43-repressed gene; induced by alpha pheromone in SpiderM medium
C1_12110C_A	orf19.5254	16.6571	14.7595	19.4151	18.2999	0.263609	0.837304	Protein of unknown function; repressed by nitric oxide
C1_12120W_A	orf19.5253	5.9149	8.12366	14.2421	15.0511	1.06117	0.0209768	Has domain(s) with predicted ATP binding, protein kinase activity, protein tyrosine kinase activity and role in protein phosphorylation
C1_12140W_A	orf19.5250	127.157	179.099	72.4158	76.2863	-1.04232	0.0183779	Has domain(s) with predicted cofactor binding activity
C1_12150C_A	orf19.5249	4.08005	8.77989	10.5034	9.18147	0.614206	0.544392	Ortholog(s) have role in macroautophagy and phagophore assembly site localization
C1_12170C_A	orf19.5247	21.0377	19.8061	26.3829	23.0134	0.274285	0.667982	Has domain(s) with predicted protein tyrosine phosphatase activity
C1_12180C_A	orf19.5246	23.4059	17.8077	25.1839	15.9378	-0.00322214	0.997361	Protein of unknown function; Hap43-repressed gene
C1_12240C_A	orf19.5239	8.2966	8.64875	13.6222	10.881	0.532085	0.398109	Predicted alanine-tRNA ligase; oxidative stress-induced via Cap1
C1_12250C_A	orf19.5238	34.5092	35.3071	25.0048	16.5372	-0.748993	0.0873297	Ortholog of C. dubliniensis CD36 : Cd36_11490, C. parapsilosis CDC317 : CPAR2_701040, Candida tenuis NRRL Y-1498 : CANTEDRAFT_104365 and Debaryomyces hansenii CBS767 : DEHA2G09790g
C1_12280C_A	orf19.5235	23.1279	25.1411	11.8843	26.9651	-0.313203	0.694765	Putative mitochondrial ribosomal protein of the large subunit; Hap43-induced; mutants are viable; protein level decreases in stationary phase
C1_12300W_A	orf19.5233	2.44585	2.16721	0	0	#N/A	0.0520832	Ortholog of Candida albicans WO-1 : CAWG_00211
C1_12330W_A	orf19.5231	0	0.202646	0	0.369492	0.866583	1	Protein of unknown function; flow model biofilm induced
C1_12350W_A	orf19.5229	42.3978	36.1172	53.8213	94.3385	0.916115	0.0378251	Ortholog(s) have 3'-5'-exoribonuclease activity, Ran GTPase binding, endoribonuclease activity, tRNA binding activity
C1_12370W_A	orf19.5227	37.7417	30.596	53.5722	45.7323	0.539176	0.380856	Chaperone component; involved in assembly of alpha subunits into the 20S proteasome; flow model biofilm induced
C1_12400C_A	orf19.5225	141.626	127.293	149.133	146.156	0.134959	0.861148	Ortholog of Candida albicans WO-1 : CAWG_00201
C1_12420C_A	orf19.5223	1.21046	2.14512	0.92821	1.46673	-0.486572	0.879583	Ortholog of Candida albicans WO-1 : CAWG_00199
C1_12430W_A	orf19.5221	9.06043	12.6321	15.9041	12.3835	0.382971	0.493107	Ortholog(s) have phosphatidylinositol-4,5-bisphosphate binding activity and role in TORC2 signaling, establishment or maintenance of actin cytoskeleton polarity, fungal-type cell wall organization, regulation of cell growth
C1_12440W_A	orf19.5220	23.6395	19.6672	16.6052	35.5685	0.268732	0.711665	Putative RNA exonuclease; induced in a ssr1 null mutant
C1_12460C_A	orf19.69.2	13.7495	3.32267	14.3774	11.107	0.57797	0.774035	Dubious open reading frame
C1_12470W_A	orf19.69	2.1389e-06	2.08185e-10	16.8538	16.6499	23.9008	0.513042	Protein of unknown function; induced by Mnl1 under weak acid stress
C1_12480W_A	orf19.68.2	9.84842	8.96063	10.7016	17.3897	0.578697	0.459562	Ortholog of C. dubliniensis CD36 : Cd36_11670, C. parapsilosis CDC317 : CPAR2_201750, Candida tenuis NRRL Y-1498 : CANTEDRAFT_115679 and Debaryomyces hansenii CBS767 : DEHA2E16940g
C1_12530C_A	orf19.3763	7.24341	12.3016	18.9776	12.0277	0.665714	0.241022	Ortholog of C. dubliniensis CD36 : Cd36_11710, Candida tenuis NRRL Y-1498 : CANTEDRAFT_112512, Debaryomyces hansenii CBS767 : DEHA2E16808g and Pichia stipitis Pignal : PICST_53617
C1_12540W_A	orf19.3762	40.4093	36.7481	20.6579	40.088	-0.345017	0.648175	Ortholog of C. dubliniensis CD36 : Cd36_11720, C. parapsilosis CDC317 : CPAR2_201890, Candida tenuis NRRL Y-1498 : CANTEDRAFT_91948 and Debaryomyces hansenii CBS767 : DEHA2E16786g
C1_12570C_A	orf19.3759	129.632	99.9658	120.257	180.092	0.38753	0.503378	Putative elongator complex subunit; for modification of wobble nucleosides in tRNA; Spider biofilm induced
C1_12580W_A	orf19.3758	64.6916	59.3721	59.292	54.3614	-0.126441	0.86764	Has domain(s) with predicted membrane localization
C1_12610W_A	orf19.3755	162.254	127.365	109.632	140.833	-0.209546	0.754296	Ortholog(s) have structural constituent of ribosome activity and mitochondrial large ribosomal subunit localization
C1_12630C_A	orf19.6360	39.8429	29.531	37.4701	68.2171	0.607336	0.248011	Protein involved in pre-mRNA splicing; Spider biofilm induced
C1_12640W_A	orf19.6359	13.1142	30.1069	7.31367	12.5199	-1.12379	0.226098	Ortholog(s) have role in mitochondrial respiratory chain complex assembly, proteolysis and mitochondrial inner membrane peptidase complex localization
C1_12650C_A	orf19.6358	80.3852	84.6762	49.5718	66.2984	-0.510495	0.395375	Ortholog(s) have ubiquitin conjugating enzyme activity, ubiquitin-protein transferase activity and role in free ubiquitin chain polymerization, postreplication repair, protein K63-linked ubiquitination
C1_12660W_A	orf19.6357	18.7604	18.2855	18.4619	21.3683	0.104552	0.895337	Ortholog(s) have role in activation of mitotic cell cycle spindle assembly checkpoint, microtubule plus-end directed mitotic chromosome migration and mitotic DNA integrity checkpoint, more
C1_12670C_A	orf19.6356	9.8334	8.4241	10.7211	20.3294	0.766127	0.100202	Ortholog(s) have role in mRNA splicing, via spliceosome and U4/U6 snRNP, U4/U6 x U5 tri-snRNP complex localization
C1_12680W_A	orf19.6355	160.4	132.291	152.894	267.337	0.521805	0.349055	Ortholog(s) have unfolded protein binding activity, role in ribosome biogenesis and nucleolus localization
C1_12690C_A	orf19.6354	6.8651	5.14717	8.09896	7.46536	0.373735	0.752165	Ortholog of C. dubliniensis CD36 : Cd36_11870, C. parapsilosis CDC317 : CPAR2_201650, Candida tenuis NRRL Y-1498 : cten_CGOB_00224 and Debaryomyces hansenii CBS767 : DEHA2D04884g
C1_12700W_A	orf19.6353	7.2375	10.3723	13.1267	6.55828	0.160716	0.842531	Ortholog of Candida albicans WO-1 : CAWG_00172
C1_12710C_A	orf19.6351	29.2067	35.9001	24.2063	37.8132	-0.0700891	0.93267	Ortholog of C. dubliniensis CD36 : Cd36_11880, Candida tenuis NRRL Y-1498 : cten_CGOB_00231, Debaryomyces hansenii CBS767 : DEHA2D04928g and Pichia stipitis Pignal : PICST_29234
C1_12720C_A	orf19.6350	3.48192	3.7023	2.40302	3.094	-0.386181	0.843048	Ortholog of C. dubliniensis CD36 : Cd36_11890 and Candida albicans WO-1 : CAWG_00170
C1_12740W_A	orf19.6348	9.19134	10.5396	21.7663	20.564	1.10123	0.00687572	Predicted cysteine proteinase domain; mutants are viable
C1_12750C_A	orf19.6347	24.0526	23.1591	36.4222	65.094	1.10449	0.0110995	Pre-mRNA splicing factor; important for catalytic step II of pre-mRNA splicing; possible role in cell cycle progression; Spider biofilm induced
C1_12760W_A	orf19.6346	90.6011	65.8705	90.0208	138.746	0.547974	0.261876	Putative nuclear export protein; Hap43p-induced gene; decreased transcription is observed in an azole-resistant strain that overexpresses MDR1
C1_12800W_A	orf19.6342	12.1394	5.19278	24.3955	27.052	1.56965	0.0375838	Ortholog of C. dubliniensis CD36 : Cd36_11980, C. parapsilosis CDC317 : CPAR2_201330, Candida tenuis NRRL Y-1498 : CANTEDRAFT_114815 and Debaryomyces hansenii CBS767 : DEHA2G10032g
C1_12810W_A	orf19.6341	31.3711	31.18	39.3299	50.0134	0.514324	0.305066	Ortholog(s) have 5-amino-6-(5-phosphoribosylamino)uracil reductase activity and role in riboflavin biosynthetic process
C1_12820C_A	orf19.6340	191.092	143.236	146.739	302.03	0.424709	0.440678	Ortholog(s) have RNA polymerase I activity, RNA polymerase II activity, RNA polymerase III activity, RNA-directed 5'-3' RNA polymerase activity
C1_12830C_A	orf19.4913	17.1673	20.3737	21.4911	32.7205	0.530134	0.291317	Ortholog(s) have ubiquitin binding activity
C1_12840W_A	orf19.4914	32.1321	33.3326	22.2358	18.3596	-0.6894	0.430867	Ortholog(s) have role in cellular response to DNA damage stimulus and FANCM-MHF complex localization
C1_12860C_A	orf19.4916	9.72268	15.1186	12.8645	8.77809	-0.198862	0.808071	Protein of unknown function; induced by alpha pheromone in SpiderM medium
C1_12870C_A	orf19.4917	5.31653	9.18619	5.09606	3.4358	-0.765391	0.469117	Ortholog of Candida albicans WO-1 : CAWG_00155
C1_12880C_A	orf19.4918	12.9667	20.203	12.0786	9.34984	-0.630338	0.239456	Has domain(s) with predicted DNA binding, nucleic acid binding activity
C1_12890W_A	orf19.4919	9.06114	10.5792	12.0982	12.4004	0.318879	0.662635	Has domain(s) with predicted nucleic acid binding activity
C1_12900W_A	orf19.4921	8.99408	13.7606	8.18431	5.27961	-0.757066	0.148885	Ortholog of C. dubliniensis CD36 : Cd36_12030 and Candida albicans WO-1 : CAWG_00152
C1_12910W_A	orf19.4921.1	4913.87	7251.77	613.864	571	-3.36002	0.000848373	Protein of unknown function; Spider biofilm repressed
C1_12920C_A	orf19.4922	28.8984	35.8488	28.7366	22.5914	-0.335073	0.601807	Ortholog(s) have Rab GTPase binding activity and Golgi apparatus localization
C1_12930C_A	orf19.4923	2.9654	4.32778	6.15303	5.8478	0.718514	0.323873	Predicted membrane transporter; sugar porter (SP) family member, major facilitator superfamily; caspofungin induced; Spider biofilm induced
C1_12940C_A	orf19.4923.1	6.79289	0	15.6269	13.7184	2.11103	0.460043	Ortholog of C. parapsilosis CDC317 : CPAR2_801655, Candida tropicalis MYA-3404 : CTRG_06172 and Candida albicans WO-1 : CAWG_02233
C1_12950W_A	orf19.4924	8.37006	10.9296	15.684	19.1913	0.853626	0.0452683	Protein of unknown function; repressed in ssr1 mutant; Spider biofilm induced
C1_13010W_A	orf19.4929	17.3037	18.0086	21.906	36.2801	0.720502	0.110117	Ortholog(s) have mRNA binding, translation regulator activity and role in mitochondrial respiratory chain complex IV biogenesis, positive regulation of mitochondrial translational initiation
C1_13030C_A	orf19.4931	64.1793	72.9764	66.1541	71.1586	0.00165035	0.997935	Putative tRNA-Cys synthetase; induced by alpha pheromone in SpiderM medium; ribosomal subunits, translation factors, tRNA synthetases are downregulated upon phagocytosis by murine macrophage
C1_13060C_A	orf19.4932	140.446	151.365	105.785	120.871	-0.364526	0.545821	Ortholog(s) have role in mitochondrial translation and mitochondrion localization
C1_13090W_A	orf19.4936	6.761	1.08923	8.01242	5.46161	0.779373	0.61594	Dubious open reading frame
C1_13100W_A	orf19.4936.1	178.116	68.869	4812.71	7633.7	5.65516	0.000848373	Putative adhesin-like protein; Spider biofilm induced
C1_13130C_A	orf19.4940	118.165	75.9417	76.7562	129.361	0.0866188	0.920971	Putative histidine permease; fungal-specific (no human or murine homolog); Hap43p-induced gene
C1_13150W_A	orf19.4942	2.14211	3.16346	2.19016	2.30722	-0.23842	0.946202	Ortholog of Candida albicans WO-1 : CAWG_00134
C1_13180W_A	orf19.4946	1.05753	1.87411	3.56814	2.05029	0.938457	0.554137	Ortholog of C. dubliniensis CD36 : Cd36_12240, C. parapsilosis CDC317 : CPAR2_801750, Candida tenuis NRRL Y-1498 : CANTEDRAFT_135403 and Pichia stipitis Pignal : PICST_29111
C1_13190W_A	orf19.4947	540.445	621.07	380.704	227.481	-0.933423	0.0326131	Mitochondrial membrane protein of unknown function; Spider biofilm induced
C1_13210C_A	orf19.4949	17.1302	11.131	0	14.7605	-0.937084	0.593419	Ortholog of C. parapsilosis CDC317 : CPAR2_801735, C. dubliniensis CD36 : Cd36_84090, Candida orthopsilosis Co 90-125 : CORT_0B03960 and Spathaspora passalidarum NRRL Y-27907 : SPAPADRAFT_141253
C1_13240W_A	orf19.4951	108.479	85.5173	59.4782	91.032	-0.366169	0.515296	Protein of unknown function; Spider biofilm induced
C1_13250W_A	orf19.4952	447.331	390.11	745.641	898.987	0.973701	0.0342739	Protein of unknown function; flow model biofilm induced; Spider biofilm induced
C1_13260W_A	orf19.4952.1	228.607	194.677	130.039	103.689	-0.856798	0.0450317	Ortholog(s) have FK506 binding, Hsp70 protein binding, chaperone binding, peptidyl-prolyl cis-trans isomerase activity and membrane localization
C1_13270W_A	orf19.4953	22.4792	30.6319	32.7775	21.323	0.026628	0.977864	Putative ATPase; predicted role in ER-associated protein catabolism; induced during chlamydospore formation in both C. albicans and C. dubliniensis; rat catheter biofilm repressed
C1_13280C_A	orf19.4954	150.056	190.794	93.3162	95.101	-0.855207	0.0491284	Ortholog(s) have integral component of membrane localization
C1_13290W_A	orf19.4955	0.356783	0.553241	0.752372	0.648479	0.622328	1	Ortholog(s) have role in ascospore wall assembly and ascospore wall, mitochondrion, prospore membrane localization
C1_13320C_A	orf19.4959	102.146	94.1603	86.7333	76.8631	-0.262966	0.676524	Protein of unknown function; Spider biofilm repressed
C1_13330C_A	orf19.4960	240.995	175.79	272.682	425.264	0.743811	0.128539	Ortholog(s) have spermine synthase activity and role in pantothenate biosynthetic process, spermine biosynthetic process
C1_13370W_A	orf19.4963	41.8078	41.6756	27.3995	75.3015	0.298889	0.646335	Ortholog(s) have role in ubiquitin-dependent ERAD pathway
C1_13380W_A	orf19.4964	41.545	38.7668	51.1697	75.7339	0.66005	0.161759	Ortholog(s) have role in mRNA splicing, via spliceosome and RES complex localization
C1_13390W_A	orf19.4965	5.94078	8.97651	11.7005	11.5682	0.641407	0.212475	Protein of unknown function; rat catheter biofilm induced
C1_13430C_A	orf19.4970	8.74968	9.1251	16.9815	10.0705	0.597807	0.282405	Protein of unknown function; Spider biofilm induced
C1_13460W_A	orf19.4976	6.91893	6.13072	6.48463	19.8727	1.01419	0.420601	Ortholog of Candida albicans WO-1 : CAWG_00105
C1_13490C_A	orf19.4981	7.47164	8.86376	11.9324	12.5203	0.58199	0.269407	Ortholog(s) have role in cellular calcium ion homeostasis, regulation of G0 to G1 transition
C1_13530W_A	orf19.4984	27.8019	27.8781	42.1706	43.5093	0.621796	0.172962	Pseudogene; has lysine motifs associated with chitin binding
C1_13560W_A	orf19.4988	14.8181	15.9152	30.1633	30.9049	0.990622	0.0219281	S. cerevisiae ortholog Sae2 is an endonuclease that processes hairpin DNA structures with the MRX complex, involved in meiotic and mitotic double-strand break repair; upregulated in a cyr1 null mutant
C1_13590W_A	orf19.4995	1.26891	1.53322	3.00756	4.10017	1.34287	0.176421	Ortholog of C. dubliniensis CD36 : Cd36_12580
C1_13600W_A	orf19.4996	2.55445	0.905378	4.04822	3.98946	1.21608	0.27623	Ortholog of S. cerevisiae : YBL029W, C. glabrata CBS138 : CAGL0F04125g, C. parapsilosis CDC317 : CPAR2_201430 and Candida tenuis NRRL Y-1498 : CANTEDRAFT_136724
C1_13650C_A	orf19.5003	23.5396	29.6402	22.9593	22.435	-0.228368	0.729382	Ortholog(s) have GTPase regulator activity and cytoplasm, nucleus localization
C1_13690C_A	orf19.5006.1	618.455	588.825	445.71	503.889	-0.346369	0.541695	Ortholog(s) have SNAP receptor activity and role in Golgi to plasma membrane transport, endocytosis, exocytosis, prospore membrane biogenesis, vesicle fusion
C1_13720W_A	orf19.5009	39.61	36.7457	43.6328	64.2731	0.498966	0.312976	Ortholog of S. cerevisiae : KEL3, C. glabrata CBS138 : CAGL0A01067g, C. dubliniensis CD36 : Cd36_12710, C. parapsilosis CDC317 : CPAR2_201590 and Candida tenuis NRRL Y-1498 : cten_CGOB_00106
C1_13750C_A	orf19.5012	9.91102	13.5721	6.6788	14.0716	-0.178488	0.886581	Ortholog of C. dubliniensis CD36 : Cd36_12740, C. parapsilosis CDC317 : CPAR2_201620, Candida tenuis NRRL Y-1498 : CANTEDRAFT_107586 and Debaryomyces hansenii CBS767 : DEHA2D04994g
C1_13770C_A	orf19.5014	9.83527	10.9973	5.56666	6.24253	-0.818929	0.321943	Has domain(s) with predicted nucleic acid binding activity
C1_13790C_A	orf19.5016	98.1467	68.2842	118.746	137.426	0.622185	0.268155	Ortholog(s) have role in [4Fe-4S] cluster assembly, protein maturation by [4Fe-4S] cluster transfer and mitochondrial matrix localization
C1_13810W_A	orf19.5019	121.579	104.337	77.4026	45.2041	-0.881748	0.0626428	Ortholog of C. dubliniensis CD36 : Cd36_12800, C. parapsilosis CDC317 : CPAR2_203460, Candida tenuis NRRL Y-1498 : CANTEDRAFT_94106 and Debaryomyces hansenii CBS767 : DEHA2C13948g
C1_13820C_A	orf19.5020	150.289	113.761	178.78	306.016	0.876564	0.0604311	Protein of unknown function; Hap43-induced; Spider biofilm induced
C1_13840W_A	orf19.5022	213.982	198.915	96.7373	127.262	-0.882286	0.0652412	Ortholog(s) have inorganic cation transmembrane transporter activity and role in cellular cobalt ion homeostasis, cellular manganese ion homeostasis, cobalt ion transport, manganese ion transport
C1_13880C_A	orf19.5026	258.961	198.878	266.265	366.887	0.467711	0.432355	C2H2 transcription factor; Spider biofilm induced
C1_13950C_A	orf19.5033	4.46214	8.98592	3.42168	4.58763	-0.747649	0.587853	Ortholog(s) have Atg8 ligase activity, enzyme activator activity, protein tag activity
C1_14020W_A	orf19.7209	7.52216	8.71607	19.9668	14.4901	1.0854	0.291879	Putative Rho GDP dissociation inhibitor; induced by nitric oxide independent of Yhb1p
C1_14030W_A	orf19.7210	34.4938	40.1887	67.9839	39.7217	0.528251	0.292894	Protein of unknown function; Spider biofilm induced
C1_14040W_A	orf19.7212	13.4859	17.1278	14.4348	10.7579	-0.281171	0.643744	Phosphorylated protein; homozygous transposon insertion causes decreased colony wrinkling in filamentous growth-inducing conditions, but does not block hyphal formation in liquid media; Hap43-repressed
C1_14050C_A	orf19.7213	15.7556	19.3074	25.249	23.71	0.481623	0.342976	Putative ATP-dependent RNA helicase; fungal-specific (no human or murine homolog)
C1_14060W_A	orf19.7214	157.251	225.951	62.7536	34.1861	-1.98295	0.000848373	Glucan 1,3-beta-glucosidase; regulated by Nrg1, Tup1 and possibly Tac1; induced by NO and during cell wall regeneration; stationary phase enriched; possibly essential (UAU1 method); F-12/CO2 early biofilm induced; flow biofilm repressed
C1_14080W_A	orf19.7215	44.8361	42.276	65.18	122.085	1.10414	0.0152918	Nucleolar protein; component of the small subunit processome containing the U3 snoRNA; involved in pre-18S rRNA processing; flow model biofilm repressed
C1_14090W_A	orf19.7215.3	587.143	497.406	327.03	245.162	-0.922525	0.0265194	Ortholog(s) have chaperone binding, unfolded protein binding activity, role in chaperone-mediated protein complex assembly, protein import into mitochondrial intermembrane space, protein refolding and mitochondrial matrix localization
C1_14160W_A	orf19.7223	26.5529	26.7639	20.8281	37.6138	0.132415	0.860163	Ortholog(s) have protein-lysine N-methyltransferase activity, role in peptidyl-lysine monomethylation and cytosol, nucleus localization
C1_14170W_A	orf19.7224	39.1747	47.4892	56.2715	49.2483	0.28401	0.636171	Ortholog(s) have ubiquitin-protein transferase activity and role in histone catabolic process, histone ubiquitination
C1_14180W_A	orf19.7225	17.6836	15.7455	30.4939	15.0515	0.446204	0.412776	Ortholog of C. dubliniensis CD36 : Cd36_13150, C. parapsilosis CDC317 : CPAR2_700610, Candida tenuis NRRL Y-1498 : CANTEDRAFT_135418 and Debaryomyces hansenii CBS767 : DEHA2B01298g
C1_14190C_A	orf19.7227	453.604	406.204	409.683	194.351	-0.509385	0.318979	Protein phosphatase inhibitor; Hap43-repressed; homozygous Tn insertion decreases colony wrinkling but does not block hyphal growth in liquid media; mutation confers hypersensitivity to toxic ergosterol analog; Spider biofilm induced
C1_14200W_A	orf19.7228	32.6069	29.2899	23.7421	14.4992	-0.694732	0.172962	Possible Golgi membrane protein; transcript positively regulated by Tbf1; mRNA binds She3
C1_14240W_A	orf19.7234	61.1523	63.64	54.2201	51.5221	-0.238977	0.709473	Putative RSC chromatin remodeling complex component; possibly an essential gene, disruptants not obtained by UAU1 method
C1_14250C_A	orf19.7235	48.9644	39.7532	56.8508	59.6969	0.393628	0.478622	Putative protein of unknown function; mutation confers hypersensitivity to amphotericin B
C1_14270W_A	orf19.7237	21.8335	24.2263	31.3732	23.3575	0.248845	0.728134	Ortholog(s) have arylformamidase activity and role in NAD biosynthetic process
C1_14310W_A	orf19.7243	28.4105	37.5672	31.2822	17.0656	-0.448527	0.42591	Deoxycytidine monophosphate (dCMP) deaminase; role in dUMP and dTMP biosynthesis; Spider biofilm repressed
C1_14320C_A	orf19.7244	222.135	226.162	116.257	77.7068	-1.20867	0.00156339	Putative fumarylacetoacetate hydrolase; induced by nitric oxide independent of Yhb1; regulated by Sef1, Sfu1, Hap43; flow model biofilm induced
C1_14330W_A	orf19.7245	32.0435	27.0224	30.3334	36.3284	0.174535	0.801862	Ortholog(s) have tRNA-5-taurinomethyluridine 2-sulfurtransferase activity, role in mitochondrial tRNA wobble position uridine thiolation and mitochondrion localization
C1_14350W_A	orf19.7250	38.3676	36.176	136.545	135.498	1.86768	0.000848373	Protein of unknown function; rat catheter and Spider biofilm induced
C1_14370W_A	orf19.7252	7.75101	0	2.97184	2.34801	-0.543002	0.856659	Ortholog of Candida albicans WO-1 : CAWG_00017
C1_14380C_A	orf19.7254	44.3624	40.1603	54.3157	71.434	0.573144	0.244181	Ortholog(s) have role in mRNA metabolic process, mitochondrial translational initiation and extrinsic component of membrane, mitochondrial inner membrane localization
C1_14410W_A	orf19.7256	322.676	325.505	142.752	80.2036	-1.53964	0.533524	Ortholog of S. cerevisisae/S. pombe Lsm5; Lsm (Like Sm) protein involved in mRNA decay; Predicted ORF from Assembly 19; removed from Assembly 20; restored based on comparative genome analysis; flucytosine induced
C1_14430C_A	orf19.7260	67.8204	65.5408	82.0161	56.9378	0.0592667	0.971374	Protein with a predicted NADP-dependent oxidoreductase or aldo-keto reductase domain; Hap43-repressed; Spider biofilm repressed
C1_14450C_A	orf19.7263	166.895	160.077	194.371	170.578	0.158528	0.841267	Putative X-Pro aminopeptidase; Spider biofilm repressed
C1_14460W_A	orf19.7264	185.933	208.998	201.555	133.596	-0.236789	0.718722	Metalloprotease subunit of the 19S regulatory particle of the 26S proteasome lid; couples the deubiquitination and degradation of proteasome substrates; role in fission of mitochondria and peroxisome; Spider biofilm repressed
C1_14470W_A	orf19.7265	71.2629	64.5389	90.6747	74.2741	0.280516	0.6399	Putative zinc-finger domain protein with a predicted role in pre-mRNA splicing; Hap43-repressed; Spider biofilm repressed
C1_14480W_A	orf19.7266	110.308	105.118	111.719	101.718	-0.0133895	0.993492	Ortholog of Candida albicans WO-1 : CAWG_00007
C1_14500C_A	orf19.7269	358.192	340.627	416.837	467.366	0.339459	0.576143	Putative polyamine acetyltransferase; acetylates polyamines (e.g. putrescine, spermidine, spermine) and aralkylamines (e.g. tryptamine, phenylethylamine); Spider biofilm repressed
C1_14520W_A	orf19.7270	376.73	384.146	272.643	267.327	-0.494781	0.371849	Protein of unknown function; Spider biofilm repressed
C1_14530W_A	orf19.7271	473.087	446.435	576.485	516.763	0.249665	0.677236	Protein of unknown function; transcript detected on high-resolution tiling arrays
C1_14550C_A	orf19.7272	51.6143	68.2004	132.625	101.676	0.96756	0.0966202	Protein of unknown function; transcript detected on high-resolution tiling arrays
C1_14560C_A	orf19.7274	34.1538	38.5042	52.1461	37.3201	0.300222	0.622051	Predicted ORF in retrotransposon Zorro2 with similarity to retroviral reverse transcriptase proteins
C1_14580C_A	orf19.7277	43.7181	50.359	59.2259	30.3129	-0.07133	0.94177	Predicted ORF in retrotransposon Zorro2 with similarity to zinc finger-containing retroviral nucleocapsid proteins; un-merged from orf19.7275 in a revision of Assembly 21 based on comparative genome analysis and new sequence data
C1_14630C_A	orf19.7278	5.69093	7.23505	10.815	11.7928	0.806547	0.336392	Similar to a region of the Tca2 (pCal) retrotransposon, which is present in strain hOG1042 as 50 to 100 copies of a linear dsDNA; rat catheter biofilm repressed
C2_00050C_A	orf19.1920	0.715382	0	1.64572	0.577894	1.63612	0.58267	Ortholog of C. dubliniensis CD36 : Cd36_15040
C2_00060C_A	orf19.1917	107.362	107.563	103.462	98.8719	-0.0870969	0.914544	Protein of unknown function; Spider biofilm repressed
C2_00090W_A	orf19.1913	46.8766	42.0309	43.4349	53.4201	0.123523	0.88186	Protein of unknown function; flow model biofilm induced
C2_00110W_A	orf19.1910	139.105	100.101	144.596	194.322	0.502684	0.316806	Predicted NADH-dependent flavin oxidoreductase; Hap43-repressed gene
C2_00130W_A	orf19.1906	44.4376	16.4063	73.8311	136.11	1.7868	0.00392336	Protein of unknown function; flow model biofilm induced
C2_00170C_A	orf19.2115	60.3438	62.6817	81.7793	116.714	0.690135	0.146234	Putative molybdopterin-converting factor; fungal-specific (no human or murine homolog)
C2_00180C_A	orf19.2114	41.3386	45.7866	56.241	35.9522	0.0815701	0.920379	Predicted uricase; ortholog of S. pombe SPCC1223.09; Spider biofilm induced
C2_00190C_A	orf19.2113	63.933	68.209	65.2145	70.3895	0.0373101	0.965189	Putative integral peroxisomal membrane protein; Hap43p-repressed gene
C2_00200W_A	orf19.2112	48.8352	48.9384	86.3386	79.9951	0.766563	0.0857047	snRNP U5 splicing factor component; involved in positioning the 3' splice site during the 2nd catalytic step of splicing; Spider biofilm induced
C2_00220C_A	orf19.2111	58.2534	59.2765	77.1401	87.5376	0.486617	0.31988	Ortholog(s) have transcription factor activity, core RNA polymerase II binding activity and role in transcription elongation from RNA polymerase II promoter, transcriptional start site selection at RNA polymerase II promoter
C2_00230W_A	orf19.2110	27.286	25.8541	36.12	27.2709	0.254472	0.681228	Ortholog(s) have arginyltransferase activity and role in protein arginylation
C2_00270C_A	orf19.2106	36.2968	35.8968	55.8462	50.3186	0.556362	0.277702	Putative protein of unknown function; Hap43p-repressed gene
C2_00280C_A	orf19.2105	20.0672	22.2264	51.8334	50.1246	1.26946	0.00945532	Putative pre-mRNA-splicing factor; possibly an essential gene, disruptants not obtained by UAU1 method
C2_00290W_A	orf19.2104	21.0567	23.0769	24.8576	18.8004	-0.0156332	0.98812	Ortholog(s) have ATPase activator activity, chaperone binding activity, role in aerobic respiration, iron-sulfur cluster assembly and mitochondrion localization
C2_00310W_A	orf19.2103	0.00114565	4.52872	0.000358088	0.000265681	-12.8262	0.633158	Ortholog of Candida albicans WO-1 : CAWG_03811
C2_00320W_A	orf19.2101	126.675	93.7565	82.7381	80.9002	-0.429817	0.415542	Ortholog(s) have protein membrane anchor activity, role in protein insertion into ER membrane, retrograde vesicle-mediated transport, Golgi to ER and GET complex localization
C2_00350W_A	orf19.2097	15.3543	17.4776	21.65	19.4642	0.32454	0.581544	Predicted DNA-dependent ATPase/helicase; Spider biofilm induced
C2_00360C_A	orf19.2095	81.5936	80.5153	123.991	100.1	0.467119	0.389642	Ortholog(s) have role in negative regulation of transcription from RNA polymerase II promoter in response to iron and cytosol localization
C2_00390C_A	orf19.2092	31.0489	31.442	33.3864	27.0618	-0.047948	0.955359	Putative peroxisomal cystathionine beta-lyase; Gcn4p-regulated
C2_00400C_A	orf19.2091	199.162	189.942	172.777	151.135	-0.264554	0.671911	Putative NADH dehydrogenase; repressed by nitric oxide, Hap43p-repressed
C2_00410C_A	orf19.2090	92.8076	79.5247	99.3616	171.036	0.649888	0.217417	Ortholog of S. cerevisiae Ecm16, an essential DEAH-box ATP-dependent RNA helicase specific to the U3 snoRNP required for 18S rRNA synthesis; Hap43-induced; Spider biofilm induced
C2_00420W_A	orf19.2089	65.8102	56.6842	77.9528	80.4858	0.371208	0.494193	Ortholog of Nyv1, v-SNARE component of the vacuolar SNARE complex involved in vesicle fusion in S. cerevisiae; Hap43-repressed gene
C2_00490W_A	orf19.2078	29.4681	28.6585	30.864	25.8104	-0.0365011	0.967586	Ortholog(s) have role in Golgi to vacuole transport and AP-1 adaptor complex localization
C2_00510W_A	orf19.2076	17.6798	18.0156	18.4154	14.1629	-0.131826	0.886581	Protein of unknown function; S. pombe ortholog SPAC7D4.05 encodes a predicted hydrolase; Hap43-repressed; Spider biofilm induced
C2_00530W_A	orf19.2074	9.84503	17.4469	55.3624	37.1136	1.7606	0.792191	Ortholog of Candida albicans WO-1 : CAWG_03833
C2_00540W_A	orf19.2073	40.5661	36.8434	70.7131	56.0011	0.710996	0.129521	Protein with a multidrug and toxin extrusion protein domain; induced by Mnl1 under weak acid stress
C2_00550W_A	orf19.2072	8.61919	11.8725	16.5836	9.17808	0.330188	0.621762	Ortholog(s) have (R)-carnitine transmembrane transporter activity, choline transmembrane transporter activity, ethanolamine transmembrane transporter activity
C2_00560W_A	orf19.2071	1.29722	0	0.33158	1.39721	0.414341	1	Protein of unknown function; induced by alpha pheromone in SpiderM medium
C2_00570W_A	orf19.2070	34.3886	40.0714	48.5858	54.1636	0.464593	0.371086	Ortholog(s) have DNA translocase activity, role in chromatin remodeling, nucleosome disassembly, transcription elongation from RNA polymerase II promoter and RSC-type complex localization
C2_00590W_A	orf19.2068	27.2518	23.7676	21.0288	11.2841	-0.658937	0.183942	Ortholog of C. dubliniensis CD36 : Cd36_15550, C. parapsilosis CDC317 : CPAR2_213190, Candida tenuis NRRL Y-1498 : CANTEDRAFT_119026 and Debaryomyces hansenii CBS767 : DEHA2G08514g
C2_00600C_A	orf19.2067	81.459	70.3336	128.479	131.42	0.775848	0.0761707	Protein with a predicted role in mitochondrial iron metabolism; Hap43-repressed; expression upregulated during growth in the mouse cecum; Spider biofilm induced
C2_00620C_A	orf19.2066	21.0519	19.4706	20.8564	28.426	0.282351	0.67822	Ortholog(s) have protein-lysine N-methyltransferase activity and role in peptidyl-lysine trimethylation
C2_00630C_A	orf19.2065	10.7284	9.63295	11.2981	6.23989	-0.215346	0.823336	Ortholog(s) have role in allantoin catabolic process
C2_00640W_A	orf19.2064	4.72755	7.13803	14.3848	9.65435	1.0186	0.0284959	Putative transcription factor with zinc finger DNA-binding motif
C2_00650W_A	orf19.2063	10.7995	7.93698	15.5932	27.2222	1.19228	0.00545557	Ortholog of C. parapsilosis CDC317 : CPAR2_213140, C. dubliniensis CD36 : Cd36_15600, Lodderomyces elongisporus NRLL YB-4239 : LELG_01226 and Debaryomyces hansenii CBS767 : DEHA2B02442g
C2_00670C_A	orf19.2061	0.991796	5.27286	0.760534	3.20473	-0.659816	0.854967	Ortholog of Candida albicans WO-1 : CAWG_03846
C2_00690W_A	orf19.2059	4.66727	5.90795	12.7821	11.1762	1.17983	0.0862273	Protein with homology to magnesium-dependent endonucleases and phosphatases; regulated by Sef1, Sfu1, and Hap43; Spider biofilm induced
C2_00700W_A	orf19.2057	48.3719	55.0307	62.144	65.751	0.306687	0.611162	Ortholog(s) have ATP binding, ATPase activity, metallopeptidase activity, role in cellular protein-containing complex assembly, signal peptide processing and m-AAA complex, mitochondrial inner boundary membrane localization
C2_00730C_A	orf19.2051	10.8991	15.7713	20.2877	15.6562	0.430509	0.417884	Ortholog of C. dubliniensis CD36 : Cd36_15670, C. parapsilosis CDC317 : CPAR2_213100, Candida tenuis NRRL Y-1498 : CANTEDRAFT_135034 and Debaryomyces hansenii CBS767 : DEHA2E14960g
C2_00740C_A	orf19.2050	84.9903	71.1816	112.043	67.5141	0.201311	0.773228	Ortholog(s) have sterol esterase activity, role in cellular lipid metabolic process, sterol metabolic process and integral component of membrane, lipid droplet localization
C2_00750W_A	orf19.2049	91.0054	42.8891	12.2333	16.1089	-2.24008	0.000848373	Plasma membrane-associated protein; heterozygous null mutant displays sensitivity to virgineone; Spider biofilm induced
C2_00760C_A	orf19.2048	1411.86	891.56	413.101	240.788	-1.81666	0.000848373	Proten of unknown function; transcript positively regulated by Sfu1; Hap43 repressed; Spider biofilm induced
C2_00770W_A	orf19.2047	31.8091	15.3289	33.1646	13.9749	4.47721e-05	0.996164	Putative protein of unknown function; Hap43p-repressed gene; mutation confers hypersensitivity to toxic ergosterol analog, and to amphotericin B
C2_00790C_A	orf19.2045	208.007	165.88	150.716	217.868	-0.0206079	0.981751	Ortholog(s) have diacylglycerol kinase activity, role in phosphatidic acid biosynthetic process and integral component of endoplasmic reticulum membrane localization
C2_00810C_A	orf19.2043	27.8577	27.3769	28.2237	30.005	0.0761576	0.933835	Ortholog of C. dubliniensis CD36 : Cd36_15750, C. parapsilosis CDC317 : CPAR2_213000, Debaryomyces hansenii CBS767 : DEHA2D18524g and Pichia stipitis Pignal : PICST_42355
C2_00820W_A	orf19.2042	14.2044	17.1851	26.6722	21.7721	0.626046	0.195619	Ortholog(s) have role in mitochondrial tRNA wobble uridine modification and mitochondrial inner membrane localization
C2_00830C_A	orf19.2041	39.8184	32.2195	49.8824	47.4668	0.434412	0.4064	Ortholog(s) have DNA translocase activity, lysine-acetylated histone binding activity and role in ATP-dependent chromatin remodeling, nucleosome disassembly, transcription elongation from RNA polymerase II promoter
C2_00840W_A	orf19.2040	22.6062	29.3786	34.6122	36.2795	0.447528	0.385192	Ortholog(s) have oxidoreductase activity, acting on NAD(P)H activity
C2_00860C_A	orf19.2038	0.784483	0.993019	33.7733	17.0197	4.83671	0.000848373	Protein of unknown function; Spider biofilm induced
C2_00870W_A	orf19.2037	26.8507	43.4817	37.9847	34.4053	0.0416002	0.971232	Ortholog of C. dubliniensis CD36 : Cd36_15810, C. parapsilosis CDC317 : CPAR2_212950, Candida tenuis NRRL Y-1498 : CANTEDRAFT_116162 and Debaryomyces hansenii CBS767 : DEHA2D18392g
C2_00880W_A	orf19.2036	29.5028	37.6013	32.2307	22.9621	-0.281919	0.645408	Predicted dihydrodiol dehydrogenase; ortholog of S. pombe SPAC513.06c; flow model and rat catheter biofilm repressed
C2_00890W_A	orf19.2035	2.19415	3.3329	3.96596	1.89906	0.085628	0.963071	Ortholog of C. parapsilosis CDC317 : CPAR2_212930, C. dubliniensis CD36 : Cd36_15830, Candida orthopsilosis Co 90-125 : CORT_0A12240 and Candida tropicalis MYA-3404 : CTRG_01155
C2_00900W_A	orf19.2034	0	0	0	0.392351	inf	1	Ortholog of C. parapsilosis CDC317 : CPAR2_212925, C. dubliniensis CD36 : Cd36_15840, Candida orthopsilosis Co 90-125 : CORT_0A12230 and Candida tropicalis MYA-3404 : CTRG_01156
C2_00920W_A	orf19.2032	70.0539	61.3986	98.485	98.4179	0.582943	0.216373	Protein of unknown function; rat catheter biofilm induced
C2_00940W_A	orf19.2030	942.195	565.225	754.349	727.563	-0.0246218	0.978914	Plasma membrane-associated protein; induced in cyr1 or ras1 mutant; induced by hypoxia, ketoconazole and during growth in the mouse cecum; induced in oralpharyngeal candidasis; Spider biofilm induced
C2_00980W_A	orf19.2025	9.33613	4.91881	10.126	14.1324	0.767027	0.173281	Dubious open reading frame
C2_00990W_A	orf19.2024	10.5788	2.81209	13.7905	7.69109	0.681852	0.706215	Ortholog of Candida albicans WO-1 : CAWG_03878
C2_01030W_A	orf19.2019	153.328	164.513	101.045	114.717	-0.558863	0.234109	Ortholog(s) have structural constituent of ribosome activity, role in mitochondrial translation and mitochondrial large ribosomal subunit localization
C2_01040W_A	orf19.2018.1	48.9102	36.8836	35.1116	25.2193	-0.507978	0.605494	PProtein of unknown function; gene has intron; similar to human BLOC1S2
C2_01050W_A	orf19.2018.2	155.112	127.74	165.122	215.224	0.427263	0.546905	Ortholog of Candida tropicalis MYA-3404 : CTRG_04298
C2_01060C_A	orf19.2018	93.5784	79.9413	105.245	186.464	0.749434	0.112654	Protein with a predicted DnaJ chaperone domain and a CSL-type zinc finger; Spider biofilm induced
C2_01070W_A	orf19.2017	101.841	96.1193	113.255	174.283	0.538544	0.284599	Ortholog(s) have RNA polymerase I activity, role in nucleolar large rRNA transcription by RNA polymerase I, transcription elongation from RNA polymerase I promoter and RNA polymerase I complex localization
C2_01140C_A	orf19.2010	0	3.2677	0.942637	1.98604	-0.158025	0.968344	Ortholog of C. dubliniensis CD36 : Cd36_16030, C. parapsilosis CDC317 : CPAR2_213800, Debaryomyces hansenii CBS767 : DEHA2A01320g and Pichia stipitis Pignal : PICST_29434
C2_01160W_A	orf19.2008	19.3863	20.2738	21.4346	34.5077	0.496249	0.345729	Ortholog(s) have S-methyl-5-thioribose-1-phosphate isomerase activity and role in L-methionine salvage from methylthioadenosine
C2_01170C_A	orf19.2007	11.3985	15.7621	18.3421	13.7769	0.241913	0.698256	Ortholog(s) have role in Golgi to vacuole transport, ascospore wall assembly, cellular sphingolipid homeostasis, retrograde transport, endosome to Golgi and GARP complex localization
C2_01190C_A	orf19.2006	6.87137	5.63193	9.08926	10.2689	0.630634	0.428773	Ortholog of S. cerevisiae : YPL162C, C. glabrata CBS138 : CAGL0M02057g, C. dubliniensis CD36 : Cd36_16070, C. parapsilosis CDC317 : CPAR2_213850 and Candida tenuis NRRL Y-1498 : CANTEDRAFT_112687
C2_01220W_A	orf19.2002	36.2502	39.7311	40.8013	63.1211	0.451789	0.4064	Ortholog(s) have structural constituent of nuclear pore activity
C2_01230W_A	orf19.2001	18.6011	17.9976	22.7893	22.6256	0.311372	0.858063	Has domain(s) with predicted L-ascorbic acid binding, iron ion binding, oxidoreductase activity, acting on paired donors, with incorporation or reduction of molecular oxygen and oxidoreductase activity, more
C2_01240C_A	orf19.2000	15.2767	14.4808	20.6659	40.179	1.03188	0.0328927	Ortholog(s) have DNA helicase activity and role in DNA-dependent DNA replication maintenance of fidelity, establishment of sister chromatid cohesion, interstrand cross-link repair, mitotic sister chromatid cohesion
C2_01250W_A	orf19.1999	13.1147	9.40722	9.33837	11.6032	-0.104963	0.938859	Protein of unknown function; transcript detected on high-resolution tiling arrays
C2_01260W_A	orf19.1998	13.8101	16.2794	13.3793	11.9528	-0.248295	0.700379	Ortholog of C. dubliniensis CD36 : Cd36_16140, C. parapsilosis CDC317 : CPAR2_213870, Candida tenuis NRRL Y-1498 : CANTEDRAFT_92202 and Debaryomyces hansenii CBS767 : DEHA2A01980g
C2_01310W_A	orf19.1994	14.414	11.807	17.1445	33.7929	0.958003	0.0309848	Ortholog(s) have phosphatidylinositol-3-phosphate binding activity, role in retrograde transport, endosome to Golgi and endosome localization
C2_01320W_A	orf19.1993	21.8282	27.5012	26.6769	37.8376	0.387174	0.495081	Ortholog(s) have structural molecule activity, role in proteasome assembly, ubiquitin-dependent protein catabolic process and nucleus, proteasome regulatory particle, lid subcomplex, proteasome storage granule localization
C2_01340W_A	orf19.1991	61.7788	61.2332	53.5835	82.1791	0.142287	0.849235	Has domain(s) with predicted integral component of membrane localization
C2_01370C_A	orf19.1441	109.937	115.44	119.939	254.661	0.733007	0.150361	Ortholog of C. dubliniensis CD36 : Cd36_16230, C. parapsilosis CDC317 : CPAR2_213950, Candida tenuis NRRL Y-1498 : CANTEDRAFT_112720 and Debaryomyces hansenii CBS767 : DEHA2A01848g
C2_01390W_A	orf19.1444	46.4242	48.3361	61.0556	57.4052	0.322056	0.564836	Ortholog(s) have phosphatidylinositol-4,5-bisphosphate binding activity, role in actin cortical patch assembly, actin filament organization, endocytosis and actin cortical patch localization
C2_01420C_A	orf19.1447	13.2787	17.908	18.2516	18.3501	0.230977	0.733667	Has domain(s) with predicted DNA-binding transcription factor activity, sequence-specific DNA binding activity and role in regulation of transcription, DNA-templated
C2_01440C_A	orf19.1448.1	177.726	115.132	95.056	100.137	-0.585306	0.388068	Ortholog(s) have ATP-dependent microtubule motor activity, plus-end-directed activity
C2_01450C_A	orf19.1449	43.227	30.556	17.6911	17.4596	-1.06973	0.0399177	Protein of unknown function; induced in azole-resistant strain that overexpresses MDR1; protein present in exponential and stationary growth phase yeast cultures; Spider biofilm induced
C2_01460C_A	orf19.1450	0	0	0.100214	0	inf	1	Ortholog of C. dubliniensis CD36 : Cd36_16320, Candida tropicalis MYA-3404 : CTRG_01238 and Candida albicans WO-1 : CAWG_03918
C2_01490C_A	orf19.1457	23.0758	22.932	33.1314	34.6401	0.558798	0.26199	Putative RNA polymerase transcription factor TFIIH core component; possibly an essential gene, disruptants not obtained by UAU1 method
C2_01500W_A	orf19.1456	3.2763	8.84672	16.9108	13.0013	1.30298	0.683511	Ortholog of Candida albicans WO-1 : CAWG_03922
C2_01510C_A	orf19.1458	11.4336	11.8482	16.495	15.3415	0.451474	0.537511	Ortholog(s) have tRNA-specific adenosine deaminase activity and role in tRNA modification
C2_01530C_A	orf19.1460	44.9273	57.4781	63.6814	58.0487	0.249395	0.696312	Putative glutamine-dependent NAD synthetase, involved in NAD salvage pathway
C2_01540W_A	orf19.1461	11.8498	10.4999	27.2603	30.4936	1.36966	0.00495977	S. pombe ortholog SPCC576.01c is a predicted sulfonate dioxygenase; possibly transcriptionally regulated upon hyphal formation; Spider biofilm induced
C2_01570W_A	orf19.1465	8.97354	10.7036	7.67511	6.1337	-0.510933	0.653936	Has domain(s) with predicted N-acetyltransferase activity
C2_01630W_A	orf19.1473	14.0395	13.0269	4.57039	19.1517	-0.190268	0.840914	2-hydroxyacid dehydrogenase domain-containing protein; Hap43-repressed gene; induced by alpha pheromone in SpiderM medium
C2_01650W_A	orf19.1476	4.46238	4.39335	8.04771	2.0694	0.192114	0.857043	Ortholog(s) have mRNA (N6-adenosine)-methyltransferase activity, role in mRNA methylation, meiotic cell cycle, negative regulation of pseudohyphal growth and RNA N6-methyladenosine methyltransferase complex localization
C2_01660C_A	orf19.1477	83.4099	95.9406	127.68	82.6352	0.229772	0.726584	Protein of unknown function; possible ER protein; Hap43p-repressed; Spider biofilm induced
C2_01680C_A	orf19.1479	73.096	74.0075	70.4773	57.8891	-0.196565	0.779532	Ortholog of the mitochondria localized S. cerevisiae Pib2 protein of unknown function; has a FYVE zinc finger domain; Spider biofilm induced
C2_01690W_A	orf19.1480	297.803	342.561	244.971	191.58	-0.55274	0.257484	Putative succinate dehydrogenase; enzyme of citric acid cycle; repressed by nitric oxide; Efg1, Hap43 repressed
C2_01720C_A	orf19.1483	127.844	143.234	109.817	155.408	-0.0314945	0.971179	Ortholog(s) have copper ion binding activity, role in mitochondrial respiratory chain complex IV assembly and extrinsic component of mitochondrial inner membrane, mitochondrial intermembrane space localization
C2_01730W_A	orf19.1484	14.6728	10.9286	5.70728	10.3069	-0.67688	0.362148	Ortholog of S, cerevisiae Spc24; a component of the conserved kinetochore-associated Ndc80 complex involved in chromosome segregation, spindle checkpoint activity and kinetochore clustering; Hap43-induced gene
C2_01740C_A	orf19.1485	259.887	219.744	187.565	239.441	-0.167671	0.80979	Mitochondrial ribosomal protein of the large subunit; rat catheter biofilm induced
C2_01750C_A	orf19.1486	1556.65	1276.49	518.48	939.944	-0.957991	0.0426138	Protein with a life-span regulatory factor domain; regulated by Sef1, Sfu1, and Hap43; flow model biofilm induced; Spider biofilm induced
C2_01760C_A	orf19.1488	18.5911	21.5002	23.3345	41.8537	0.701321	0.264091	Ortholog of C. dubliniensis CD36 : Cd36_16630, C. parapsilosis CDC317 : CPAR2_210300, Candida tenuis NRRL Y-1498 : CANTEDRAFT_116870 and Debaryomyces hansenii CBS767 : DEHA2B04334g
C2_01800W_A	orf19.1490.1	26.4664	16.4159	23.3394	35.2768	0.450914	0.729221	Predicted ORF in retrotransposon Tca16 with similarity to the Gag-Pol region of retrotransposons; added to Assembly 21 based on comparative genome analysis; overlaps orf19.1490.2, which is annotated as blocked reading frame
C2_01820C_A	orf19.1491	19.6313	22.4923	25.586	39.8494	0.635438	0.175393	Ortholog(s) have RNA binding activity, role in mRNA splicing, via spliceosome and U1 snRNP, U2-type prespliceosome localization
C2_01860C_A	orf19.1495	19.2725	25.5274	17.2163	30.174	0.0810997	0.934824	Ortholog(s) have role in L-methionine salvage from methylthioadenosine and cytosol localization
C2_01870C_A	orf19.1496	7.4779	9.80287	16.3387	16.7155	0.935662	0.0725202	Putative transcription factor with zinc finger DNA-binding motif; Hap43p-repressed gene
C2_01900C_A	orf19.1500	21.0086	25.7446	26.53	20.6541	0.0132345	0.986974	Ortholog of C. dubliniensis CD36 : Cd36_16720, C. parapsilosis CDC317 : CPAR2_210210, Candida tenuis NRRL Y-1498 : CANTEDRAFT_128446 and Debaryomyces hansenii CBS767 : DEHA2B04092g
C2_01910W_A	orf19.1502	17.7867	18.5417	13.9602	22.3132	-0.00218778	0.99637	Has domain(s) with predicted aminoacyl-tRNA hydrolase activity
C2_01920C_A	orf19.1504	16.9361	26.7723	39.3836	33.4742	0.737177	0.103741	Putative patatin-like phospholipase; fungal-specific (no human or murine homolog)
C2_01930C_A	orf19.1505	13.7256	13.5412	51.4322	93.3883	2.40905	0.000848373	Ortholog of S. cerevisiae : YBR138C, C. dubliniensis CD36 : Cd36_16750, C. parapsilosis CDC317 : CPAR2_212450, Candida tenuis NRRL Y-1498 : CANTEDRAFT_92365 and Debaryomyces hansenii CBS767 : DEHA2G09020g
C2_01940C_A	orf19.1506	0	1.8848	0	0	#N/A	1	Ortholog of Candida albicans WO-1 : CAWG_03962
C2_01960C_A	orf19.1508	18.8777	6.37223	4.82529	7.98788	-0.97865	0.531969	Protein of unknown function; transcript detected on high-resolution tiling arrays
C2_02000W_A	orf19.1514	67.2916	73.6702	48.8385	37.4809	-0.707548	0.107471	Ortholog(s) have enzyme binding, phosphatidylinositol-4-phosphate binding activity
C2_02020W_A	orf19.1516	19.8022	25.6004	22.2379	15.8216	-0.254517	0.681557	Ortholog(s) have thiol-dependent ubiquitin-specific protease activity and role in negative regulation of gluconeogenesis, proteasome-mediated ubiquitin-dependent protein catabolic process
C2_02040W_A	orf19.1519	19.4953	22.5714	18.4824	16.9173	-0.248937	0.699917	Protein of unknown function; Hap43-repressed gene
C2_02050C_A	orf19.1522	15.2896	15.7283	7.9194	6.45255	-1.10984	0.0134639	Ortholog of C. dubliniensis CD36 : Cd36_16850, C. parapsilosis CDC317 : CPAR2_211990, Candida tenuis NRRL Y-1498 : cten_CGOB_00169 and Debaryomyces hansenii CBS767 : DEHA2G03036g
C2_02090W_A	orf19.1525	21.8668	28.1158	31.8045	24.9603	0.183571	0.796388	Ortholog(s) have role in nuclear-transcribed mRNA catabolic process, nonsense-mediated decay
C2_02110C_A	orf19.1527	16.4779	7.44934	23.7241	17.6575	0.790335	0.289928	Protein of unknown function; Spider biofilm induced
C2_02120W_A	orf19.1528	98.7587	105.55	88.4763	132.591	0.113738	0.880983	Putative mitochondrial RNA polymerase specificity factor; possibly an essential gene, disruptants not obtained by UAU1 method
C2_02130C_A	orf19.1529	3.15848	0.381636	1.76146	1.50768	-0.114889	0.956781	Protein of unknown function; macrophage-induced gene
C2_02140C_A	orf19.1530	0	0	0	0.599709	inf	1	Protein of unknown function
C2_02150C_A	orf19.1531	21.5141	23.0106	29.6206	43.9311	0.724152	0.100699	Ortholog(s) have RNA binding, protein heterodimerization activity and role in mRNA polyadenylation, pre-mRNA cleavage required for polyadenylation, regulation of mRNA 3'-end processing, response to DNA damage checkpoint signaling
C2_02170W_A	orf19.1533	36.1165	40.7379	45.284	66.4773	0.540222	0.284066	Possible vacuolar protein; Hap43-induced gene
C2_02180W_A	orf19.1534	14.4127	16.8947	59.0593	37.7177	1.62816	0.000848373	Ortholog of S. cerevisiae Zrt3, vacuolar membrane zinc transporter; predicted Kex2 substrate; induced in oralpharyngeal candidasis; flow model biofilm induced; Spider biofilm induced
C2_02190C_A	orf19.1535	12.5807	15.925	12.8629	7.42049	-0.49095	0.527965	Protein of unknown function; Hap43-induced gene
C2_02200W_A	orf19.1536	124.61	158.753	171.734	181.763	0.319044	0.608126	Putative zinc transporter essential for tolerance to zinc; plays a role in zincosome formation; Hap43-induced; required for normal filamentous growth; mRNA binds She3 and is localized to hyphal tips
C2_02220C_A	orf19.1539	36.6113	37.8998	43.2474	27.7565	-0.0695567	0.934824	Protein of unknown function; F-12/CO2 early biofilm induced
C2_02230C_A	orf19.1541	229.044	236.331	186.977	124.834	-0.577722	0.285584	Protein with a globin-like domain; repressed by alpha pheromone in SpiderM medium; Spider biofilm induced
C2_02260W_A	orf19.1544	69.7385	70.7724	62.771	44.298	-0.392141	0.471429	Putative cis-golgi localized protein involved in ER to Golgi transport; Spider biofilm repressed
C2_02270C_A	orf19.1545	213.74	148.184	117.268	174.829	-0.30924	0.595407	Ortholog(s) have structural constituent of ribosome activity and mitochondrial small ribosomal subunit localization
C2_02280W_A	orf19.1546	50.5284	60.8839	48.9358	41.0999	-0.30734	0.603004	Membrane-localized protein of unknown function
C2_02290C_A	orf19.1547	10.9273	15.0451	11.2155	7.33339	-0.485653	0.526295	Ortholog(s) have double-stranded DNA binding, polynucleotide 3'-phosphatase activity and role in double-strand break repair
C2_02300W_A	orf19.1548	13.0386	21.3138	24.1339	30.3271	0.664813	0.270501	Ortholog(s) have role in mRNA splicing, via spliceosome and U4/U6 x U5 tri-snRNP complex localization
C2_02310W_A	orf19.1549	131.932	147.909	94.6684	113.072	-0.429821	0.419908	Plasma membrane-associated protein identified in detergent-resistant membrane fraction (possible lipid raft component); repressed by nitric oxide; predicted transmembrane helix
C2_02330W_A	orf19.1551	11.8384	15.4491	9.08754	3.38239	-1.12979	0.866498	Predicted protein of unknown function; overlaps CPR3/orf19.1552
C2_02360C_A	orf19.1557	19.0231	16.5287	17.5615	10.4437	-0.344229	0.650024	Ortholog(s) have S-adenosylmethionine-dependent methyltransferase activity and role in protein methylation
C2_02390W_A	orf19.1562	1730.16	1477.84	1429.53	632.583	-0.637552	0.232319	Protein of unknown function; flow model biofilm induced; Spider biofilm induced; repressed by alpha pheromone in SpiderM medium
C2_02410W_A	orf19.1564	208.978	216.604	160.744	112.804	-0.637645	0.17005	Plasma membrane-localized protein of unknown function
C2_02420C_A	orf19.1565	21.9726	28.2786	24.5832	30.4946	0.132312	0.862766	Protein of unknown function
C2_02440W_A	orf19.1567	14.0738	18.3092	15.9698	20.8978	0.187119	0.786241	Ortholog(s) have Rab GTPase binding, Ras guanyl-nucleotide exchange factor activity, phosphatidylinositol binding activity
C2_02490C_A	orf19.1573	19.0074	23.0627	26.6822	31.3031	0.462893	0.36719	Ortholog(s) have fungal-type vacuole membrane, vacuole-mitochondrion membrane contact site localization
C2_02500W_A	orf19.1574	24.688	27.0936	24.4313	21.529	-0.172051	0.799125	Putative TFIID subunit involved in RNA polymerase II transcription initiation; possibly an essential gene, disruptants not obtained by UAU1 method
C2_02520W_A	orf19.1576	13.8203	17.7094	61.2493	57.4811	1.91291	0.000848373	Ortholog(s) have nuclear localization sequence binding, ubiquitin binding activity and role in response to ethanol
C2_02530W_A	orf19.1577	6.29375	5.85559	27.9115	44.3169	2.57169	0.000848373	Has domain(s) with predicted DNA-binding transcription factor activity, sequence-specific DNA binding, zinc ion binding activity and role in regulation of transcription, DNA-templated
C2_02540W_A	orf19.1578	70.1571	58.8586	70.3095	174.283	0.922834	0.0686865	Ortholog of S. cereviaie Rrp5, an RNA binding protein involved in synthesis of 18S and 5.8S rRNAs; Hap43-induced gene
C2_02550C_A	orf19.1580	1.91723	1.31521	3.22492	4.19664	1.1991	0.106476	Protein of unknown function; Spider biofilm induced
C2_02560W_A	orf19.1581	0	3.20943	2.08311	2.92594	0.642221	0.85573	Planktonic growth-induced gene
C2_02570W_A	orf19.1582	38.8493	30.9812	34.7557	45.8321	0.206705	0.756065	Predicted membrane transporter; member of the drug:proton antiporter (12 spanner) (DHA1) family, major facilitator superfamily (MFS); mRNA binds She3
C2_02580W_A	orf19.1584	276.59	216.993	138.765	177.814	-0.64073	0.207323	Predicted MFS membrane transporter; monocarboxylate porter family member; colony morphology-related gene regulation by Ssn6; flow model biofilm induced; Spider biofilm induced
C2_02620W_A	orf19.1588	120.786	126.881	125.312	77.263	-0.289949	0.653066	Putative mitochondrial protein of unknown function; regulated by Sef1p-, Sfu1p-, and Hap43p
C2_02630W_A	orf19.1589	28.3857	31.5577	35.2183	64.8403	0.739172	0.098068	Putative transcription factor component of the core factor (CF) rDNA transcription factor complex; Spider biofilm induced
C2_02640C_A	orf19.1589.1	0	0.0902969	0	0	#N/A	1	Has domain(s) with predicted catalytic activity, pyridoxal phosphate binding activity and role in biosynthetic process
C2_02650C_A	orf19.5842	4.89604e-07	5.84831e-08	6.96458e-08	2.72274e-07	-0.680746	1	Protein with predicted siroheme synthase middle domains NAD(P)-binding; Hap43-repressed gene
C2_02660W_A	orf19.5841	20.2017	14.5087	20.7093	10.4786	-0.154382	0.886581	Ortholog of C. dubliniensis CD36 : Cd36_17700, C. parapsilosis CDC317 : CPAR2_212340, Candida tenuis NRRL Y-1498 : CANTEDRAFT_101113 and Debaryomyces hansenii CBS767 : DEHA2G03784g
C2_02670C_A	orf19.5840	15.8749	13.345	13.1097	9.2069	-0.388838	0.809867	Ortholog(s) have role in negative regulation of actin filament polymerization and actin cortical patch localization
C2_02700C_A	orf19.5837	28.3922	41.6769	22.9522	12.8494	-0.968753	0.0650298	Ortholog(s) have 4-amino-4-deoxychorismate lyase activity and role in folic acid biosynthetic process
C2_02710C_A	orf19.5835	165.668	120.447	127.321	247.664	0.390242	0.491309	Ortholog(s) have role in rRNA processing, ribosomal small subunit assembly and CURI complex, UTP-C complex localization
C2_02720W_A	orf19.5834	73.0297	72.5006	77.1627	108.303	0.349834	0.568493	Ortholog(s) have protein transporter activity, role in mRNA export from nucleus and cytoplasm, nucleus localization
C2_02730W_A	orf19.5833	76.6806	63.9414	105.169	91.788	0.486054	0.333857	Ortholog(s) have SUMO binding, polyubiquitin modification-dependent protein binding, ubiquitin binding activity
C2_02750C_A	orf19.5831	3.49889	4.03977	6.82954	6.50937	0.823262	0.2494	Ortholog of C. parapsilosis CDC317 : CPAR2_212260, C. dubliniensis CD36 : Cd36_17620, Candida orthopsilosis Co 90-125 : CORT_0A11590 and Candida tropicalis MYA-3404 : CTRG_01348
C2_02770W_A	orf19.5828	68.865	66.221	89.1879	99.9187	0.485322	0.366466	Ortholog(s) have pre-mRNA branch point binding activity, role in mRNA branch site recognition, mRNA cis splicing, via spliceosome and U2-type prespliceosome, U2AF, commitment complex localization
C2_02790C_A	orf19.5826	7.58663	10.6681	5.62791	3.19751	-1.04853	0.0733658	Predicted amino acid transmembrane transporter; rat catheter biofilm repressed
C2_02800W_A	orf19.5825.1	159.434	141.271	114.37	76.86	-0.653037	0.27827	Ortholog(s) have role in ER to Golgi vesicle-mediated transport and COPII-coated ER to Golgi transport vesicle, endoplasmic reticulum membrane, integral component of Golgi membrane localization
C2_02820C_A	orf19.5824	45.8017	48.8714	62.0171	98.4422	0.76118	0.0966202	Protein of unknown function; rat catheter and Spider biofilm induced
C2_02840C_A	orf19.5821	7.11642	11.2757	11.3442	10.5912	0.254174	0.686603	Ortholog of S. cerevisiae : YML002W, C. dubliniensis CD36 : Cd36_17530, C. parapsilosis CDC317 : CPAR2_212430 and Candida tenuis NRRL Y-1498 : CANTEDRAFT_128807
C2_02870W_A	orf19.5817	57.4301	51.7311	40.3892	31.2702	-0.607232	0.275943	Ortholog(s) have Rab guanyl-nucleotide exchange factor activity and role in ER to Golgi vesicle-mediated transport, intra-Golgi vesicle-mediated transport, macroautophagy, protein localization by the Cvt pathway
C2_02900W_A	orf19.5814	33.5666	38.9487	38.6096	44.5469	0.197542	0.857691	Protein of unknown function; Spider biofilm induced
C2_02910W_A	orf19.5814.1	52.7739	45.2534	63.9661	112.767	0.850315	0.277635	Protein of unknown function
C2_02920W_A	orf19.5813	1573.14	977.636	2039.08	2211.64	0.736774	0.158805	Putative adhesin-like protein; upregulated during growth in the mouse cecum; flow model, rat catheter and Spider biofilm induced
C2_02930C_A	orf19.5812	110.008	115.888	142.81	113.91	0.184537	0.795093	Ortholog of S. cerevisiae Ett1, a nuclear protein that inhibits replication of Brome mosaic virus; early-stage flow model biofilm induced
C2_02950W_A	orf19.5809	6.72581	6.04989	8.28329	3.86909	-0.0721649	0.950571	Putative arylformamidase, enzyme of the NAD biosynthesis pathway; Gcn4p-regulated
C2_02960C_A	orf19.5808	26.3403	25.6015	41.7315	62.0529	0.998621	0.019049	Ortholog(s) have protein-lysine N-methyltransferase activity and role in peptidyl-lysine dimethylation, positive regulation of translational termination
C2_03000C_A	orf19.5802	52.8728	50.0977	45.8419	76.7663	0.251825	0.687317	Ortholog(s) have transferase activity, role in maturation of SSU-rRNA and cytoplasm localization
C2_03020C_A	orf19.5799	90.0431	124.436	74.992	41.9898	-0.874551	0.0543616	Ortholog of S. cerevisiae : TPH3, C. dubliniensis CD36 : Cd36_17790, C. parapsilosis CDC317 : CPAR2_212150, Candida tenuis NRRL Y-1498 : CANTEDRAFT_128815 and Debaryomyces hansenii CBS767 : DEHA2G04246g
C2_03110W_A	orf19.5785	4.54581	3.87302	16.2226	8.89791	1.57717	0.0256371	Protein of unknown function; upregulated in a cyr1 or ras1 null mutant; induced by nitric oxide
C2_03130W_A	orf19.5783	111.519	96.5575	70.9736	108.149	-0.216165	0.747586	Ortholog(s) have protein-arginine omega-N monomethyltransferase activity and role in peptidyl-arginine methylation
C2_03140C_A	orf19.5782	42.7269	41.5281	50.4028	45.0138	0.179478	0.794809	Ortholog(s) have phospholipase activity, role in cardiolipin metabolic process, phosphatidylethanolamine metabolic process and mitochondrial matrix localization
C2_03150C_A	orf19.5780	11.4887	13.2857	15.4297	13.6327	0.230303	0.731689	Putative protein of unknown function; Hap43p-repressed gene
C2_03170W_A	orf19.5777	7.44919	14.2325	7.14028	4.3251	-0.919191	0.242629	Protein of unknown function; F-12/CO2 early biofilm induced
C2_03210W_A	orf19.909.1	429.183	327.75	294.465	141.417	-0.796228	0.176576	Ortholog of C. dubliniensis CD36 : Cd36_17965, C. parapsilosis CDC317 : CPAR2_211700, Candida tenuis NRRL Y-1498 : CANTEDRAFT_112898 and Debaryomyces hansenii CBS767 : DEHA2G05588g
C2_03260W_A	orf19.904	21.3296	22.4696	21.8081	15.1243	-0.246017	0.775267	Ortholog(s) have cytoplasm, nucleus localization
C2_03290W_A	orf19.899	154.795	195.688	104.67	81.8851	-0.909746	0.0323555	Ortholog of C. dubliniensis CD36 : Cd36_18040, C. parapsilosis CDC317 : CPAR2_211790, Candida tenuis NRRL Y-1498 : CANTEDRAFT_109928 and Debaryomyces hansenii CBS767 : DEHA2E21010g
C2_03340W_A	orf19.894	9.31765	15.6258	20.1403	11.3156	0.334671	0.585093	Ortholog(s) have guanyl-nucleotide exchange factor activity, role in retrograde transport, endosome to Golgi and Golgi membrane, RIC1-RGP1 guanyl-nucleotide exchange factor complex localization
C2_03360W_A	orf19.891	42.1	41.5196	83.0204	99.9262	1.12951	0.00687572	Putative AMP deaminase; possibly an essential gene, disruptants not obtained by UAU1 method
C2_03410W_A	orf19.880	32.3751	34.0772	47.703	56.7488	0.652448	0.169426	Ortholog(s) have role in cargo loading into COPII-coated vesicle and COPII vesicle coat localization
C2_03420C_A	orf19.879	15.6114	15.7035	29.864	31.9988	0.982224	0.0177389	Ortholog(s) have myosin binding activity, role in intracellular mRNA localization, mating type switching and cytoplasm localization
C2_03450W_A	orf19.875	29.2786	30.8942	21.6804	25.0057	-0.36612	0.518774	Protein required for respiratory growth
C2_03460C_A	orf19.874	25.7454	27.6761	34.3736	23.3312	0.111268	0.88895	Predicted mitochondrial i-AAA protease supercomplex; degrades misfolded mitochondrial proteins; Hap43-repressed gene
C2_03480C_A	orf19.873	9.05228	14.7052	10.9907	6.70315	-0.425133	0.885666	Ortholog of Candida albicans WO-1 : CAWG_04115
C2_03490C_A	orf19.872	7.77956	11.4565	17.0565	11.5952	0.574807	0.360302	Ortholog of C. dubliniensis CD36 : Cd36_18230, Debaryomyces hansenii CBS767 : DEHA2E20636g, Pichia stipitis Pignal : PICST_66811 and Spathaspora passalidarum NRRL Y-27907 : SPAPADRAFT_60843
C2_03500W_A	orf19.871	127.875	114.442	143.427	121.322	0.127729	0.877475	Ortholog(s) have GTPase activator activity, role in positive regulation of GTPase activity, positive regulation of TORC1 signaling and Lst4-Lst7 complex, vacuolar membrane localization
C2_03530W_A	orf19.867	26.5303	30.4787	31.6392	19.8089	-0.148072	0.842154	Ortholog(s) have superoxide-generating NADPH oxidase activity, role in apoptotic process, regulation of actin cytoskeleton organization and perinuclear endoplasmic reticulum localization
C2_03550C_A	orf19.864	38.5605	40.8714	48.7517	48.7288	0.295393	0.630109	Ortholog(s) have role in DNA recombination, nuclear-transcribed mRNA catabolic process, 3'-5' exonucleolytic nonsense-mediated decay and cytoplasm, polysome localization
C2_03560C_A	orf19.863	124.588	135.499	112.51	126.596	-0.121342	0.874738	Ortholog(s) have structural constituent of ribosome activity and mitochondrial large ribosomal subunit localization
C2_03570C_A	orf19.862	27.0033	22.8957	27.3116	30.0877	0.20202	0.808368	Protein of unknown function; Spider biofilm induced
C2_03630W_A	orf19.855	0.648468	0	0.497261	0.174613	0.0511564	1	Ortholog of C. dubliniensis CD36 : Cd36_18340, Candida tenuis NRRL Y-1498 : CANTEDRAFT_124631, Debaryomyces hansenii CBS767 : DEHA2D04356g and Pichia stipitis Pignal : PICST_34839
C2_03690C_A	orf19.851	0.918298	0.361637	4.18592	7.45932	3.1856	0.00219792	Protein of unknown function; repressed by Rim101; negatively modulates intracellular ATP levels during the development of azole resistance; induced by Ca(2+) in a calcineurin-dependent manner; Spider biofilm induced
C2_03700W_A	orf19.850	9.60998	16.6898	15.2296	12.2139	0.0614133	0.95523	Ortholog(s) have protein-N-terminal asparagine amidohydrolase activity, protein-N-terminal glutamine amidohydrolase activity and role in cellular protein modification process, protein catabolic process
C2_03710W_A	orf19.849	1.05763	1.11565	0.386198	0.650944	-1.06726	0.377208	Ortholog(s) have enzyme activator activity and role in protein N-linked glycosylation, protein O-linked glycosylation
C2_03760C_A	orf19.846	94.8838	86.2163	104.235	124.007	0.333783	0.597161	Predicted protein kinase similar to S. cerevisiae Nnk1; implicated in proteasome function in S. cerevisiae; induced by Mnl1 under weak acid stress
C2_03780C_A	orf19.843	26.4806	32.744	25.1885	24.0352	-0.266842	0.657301	Putative DNA repair exonuclease; fungal-specific (no human or murine homolog)
C2_03800C_A	orf19.841	39.6469	50.2573	44.0688	39.5541	-0.104491	0.894978	Ortholog(s) have role in Golgi vesicle transport and Golgi membrane localization
C2_03830W_A	orf19.839	39.1941	43.5669	47.2369	82.7849	0.651732	0.181639	Putative endoribonuclease; induced by nitric oxide independent of Yhb1p; mutation confers hypersensitivity to aureobasidin A
C2_03880C_A	orf19.836.1	84.7072	82.563	45.4689	79.832	-0.416784	0.717738	Ortholog(s) have role in mRNA splicing, via spliceosome and U1 snRNP, U2 snRNP, U2-type prespliceosome, U4/U6 x U5 tri-snRNP complex, U5 snRNP, post-mRNA release spliceosomal complex localization
C2_03890W_A	orf19.836	9.86669	3.68112	5.2763	5.55832	-0.322411	0.735028	Protein likely to be essential for growth, based on an insertional mutagenesis strategy
C2_03900C_A	orf19.835	30.9091	33.2048	30.5398	25.72	-0.188534	0.785229	Ortholog(s) have role in nucleosome mobilization and Ino80 complex, cytosol localization
C2_03910C_A	orf19.834	14.4139	16.2796	22.534	25.1324	0.635037	0.17672	Ortholog(s) have carbohydrate binding, mannosyl-oligosaccharide 1,2-alpha-mannosidase activity and role in endoplasmic reticulum mannose trimming, mannose trimming involved in glycoprotein ERAD pathway
C2_03930C_A	orf19.831	24.607	25.3051	29.819	34.9676	0.376304	0.491939	Subunit of SWI/SNF chromatin remodeling complex; involved in transcriptional regulation of carbon utilization, hyphal growth and heat stress response; fungus-specific
C2_03950W_A	orf19.828	152.789	149.643	97.0512	110.264	-0.544788	0.256421	Putative ribosomal protein, large subunit, mitochondrial precursor; repressed by prostaglandins; Spider biofilm repressed
C2_03970W_A	orf19.827	28.3993	38.7849	40.3579	27.3611	0.0114397	0.989186	Ortholog of C. dubliniensis CD36 : Cd36_18620, C. parapsilosis CDC317 : CPAR2_212480, Candida tenuis NRRL Y-1498 : CANTEDRAFT_115371 and Debaryomyces hansenii CBS767 : DEHA2D06798g
C2_04000C_A	orf19.823	0	0	0.973172	1.23022	inf	0.00818221	Protein of unknown function; Spider biofilm induced
C2_04080W_A	orf19.813	431.418	336.71	260.845	516.986	0.0181098	0.984897	Protein of unknown function; mutants are viable; Hap43-induced gene; oxidative stress-induced via Cap1; rat catheter and Spider biofilm induced
C2_04090W_A	orf19.812	1.41205	1.16182	2.55231	1.62953	0.700197	0.565212	Ortholog of C. dubliniensis CD36 : Cd36_18730, C. parapsilosis CDC317 : CPAR2_212510, Candida tenuis NRRL Y-1498 : CANTEDRAFT_135843 and Debaryomyces hansenii CBS767 : DEHA2D06732g
C2_04100W_A	orf19.811	14.2928	19.0528	22.4051	15.3264	0.17827	0.824448	Protein of unknown function; mutant is viable; Hap43-repressed
C2_04110W_A	orf19.810	4.99997	4.84386	5.11213	4.92761	0.0284308	0.976402	Ortholog(s) have DNA helicase activity, MutLbeta complex binding, heteroduplex DNA loop binding activity
C2_04120C_A	orf19.809	191.813	153.252	160.769	305.802	0.435228	0.460998	Ortholog(s) have role in maturation of LSU-rRNA from tricistronic rRNA transcript (SSU-rRNA, 5.8S rRNA, LSU-rRNA) and nucleolus, preribosome localization
C2_04130W_A	orf19.808	21.8767	27.2153	32.0514	36.2223	0.475841	0.368381	Ortholog(s) have role in histone deacetylation, negative regulation of chromatin silencing at rDNA and negative regulation of chromatin silencing at silent mating-type cassette, more
C2_04160W_A	orf19.805	21.6545	31.1798	16.7436	13.8484	-0.788321	0.14692	Putative protein of unknown function; possibly mitochondrial; Hap43-repressed; Spider biofilm repressed
C2_04170C_A	orf19.804.1	3285.21	3450.02	1999.07	1501.54	-0.944124	0.0273926	Ortholog of S. cerevisiae : YPR010C-A, C. dubliniensis CD36 : Cd36_02990, C. parapsilosis CDC317 : CPAR2_211020 and Candida tenuis NRRL Y-1498 : CANTEDRAFT_116148
C2_04180C_A	orf19.804	45.1094	59.8884	52.0612	55.3346	0.0325784	0.96982	Putative mitochondrial carrier family transporter; rat catheter biofilm induced
C2_04280W_A	orf19.792	40.5289	36.701	51.5627	118.559	1.13933	0.29986	Ortholog(s) have protein serine/threonine kinase activity, protein serine/threonine/tyrosine kinase activity, protein tyrosine kinase activity
C2_04300C_A	orf19.1592	49.1221	46.9177	98.0022	124.026	1.20904	0.00445302	Protein of unknown function; Spider biofilm induced
C2_04320W_A	orf19.1590	6.87984	10.0718	7.22532	8.88009	-0.0738775	0.942879	Ortholog of C. dubliniensis CD36 : Cd36_18970, C. parapsilosis CDC317 : CPAR2_212800, Debaryomyces hansenii CBS767 : DEHA2F08690g and Candida guilliermondii ATCC 6260 : PGUG_01488
C2_04330C_A	orf19.4521	23.544	32.2646	30.5014	27.4065	0.0532703	0.953261	S. cerevisiae ortholog Env9 has similarity to oxidoreductases and is proposed to have vacuolar functions, found in lipid particles; hyphal-induced expression
C2_04340C_A	orf19.4520	6.34587	10.6836	13.8686	6.66414	0.269893	0.821926	Putative gluconokinase; rat catheter biofilm induced
C2_04360W_A	orf19.4518	19.4482	23.661	21.1803	20.5119	-0.0482181	0.953883	Protein kinase of unknown function; mutants are viable
C2_04370W_A	orf19.4517	94.4989	119.097	66.7479	172.037	0.160828	0.833596	Protein of unknown function; Hap43-induced gene
C2_04380C_A	orf19.4516	29.9194	30.6436	29.8258	30.7802	0.00102631	0.998762	Ortholog(s) have tetrahydrofolylpolyglutamate synthase activity, role in one-carbon metabolic process, regulation of DNA methylation and mitochondrion localization
C2_04390W_A	orf19.4515	3.49693	5.22881	12.7373	9.00424	1.3171	0.10934	Predicted protein with similarity to cell wall proteins; possibly an essential gene, disruptants not obtained by UAU1 method
C2_04400W_A	orf19.4513	199.074	222.586	267.26	281.062	0.378945	0.514505	Protein of unknown function; mutants are viable; rat catheter and Spider biofilm induced
C2_04410W_A	orf19.4511	8.62816	14.2786	12.892	8.35366	-0.108603	0.897591	Ortholog of Candida albicans WO-1 : CAWG_04197
C2_04430W_A	orf19.4509	9.91796	15.8186	6.8448	5.60829	-1.04731	0.48875	Protein of unknown function
C2_04440W_A	orf19.4508	8.77228	9.65728	9.17291	6.87161	-0.199941	0.872061	Ortholog of Candida albicans WO-1 : CAWG_04200
C2_04450W_A	orf19.4507	11.7633	19.3085	17.0056	8.25626	-0.298643	0.720603	Protein of unknown function; Hap43-repressed; rat catheter biofilm repressed
C2_04480W_A	orf19.4504	16.5357	12.4498	11.3622	11.349	-0.351924	0.894526	Has domain(s) with predicted oxidoreductase activity, zinc ion binding activity and role in oxidation-reduction process
C2_04490W_A	orf19.4503	98.1052	106.786	106.734	67.5841	-0.233132	0.718123	Similar to HMG-box variant of S. pombe; Spider biofilm repressed
C2_04500W_A	orf19.4502	36.8211	43.923	38.2074	27.5609	-0.295963	0.638476	Ortholog(s) have ATPase activity, DNA binding, TBP-class protein binding activity
C2_04520C_A	orf19.4498	39.5753	44.1966	36.2731	67.3437	0.30672	0.628481	Ortholog of C. dubliniensis CD36 : Cd36_19120, C. parapsilosis CDC317 : CPAR2_103880, Candida tenuis NRRL Y-1498 : CANTEDRAFT_115581 and Debaryomyces hansenii CBS767 : DEHA2F08426g
C2_04570W_A	orf19.4492	274.806	208.742	227.486	391.199	0.355546	0.581422	Ortholog(s) have role in nuclear division, rRNA processing, ribosomal large subunit biogenesis and mitotic spindle pole body, nuclear periphery, nucleolus, preribosome, large subunit precursor localization
C2_04620W_A	orf19.4488	287.169	278.743	399.011	278.901	0.26052	0.736055	Predicted ortholog of S. cerevisiae Swi3, subunit of the SWI/SNF chromatin remodeling complex; possibly an essential gene, disruptants not obtained by UAU1 method
C2_04670W_A	orf19.149	17.6579	4.47037	42.9428	37.087	1.85465	0.0273926	Protein of unknown function; transcript detected on high-resolution tiling arrays
C2_04700C_A	orf19.154	37.1963	29.6392	35.6025	77.2806	0.756142	0.0967708	Putative ortholog of S. cerevisiae Utp30; a U3-containing 90S preribosome complex protein; Hap43-induced; Spider biofilm induced
C2_04730W_A	orf19.194	29.1651	24.1297	16.8862	37.4107	0.0268743	0.97523	Ortholog of C. dubliniensis CD36 : Cd36_19300, C. parapsilosis CDC317 : CPAR2_209720, Candida tenuis NRRL Y-1498 : CANTEDRAFT_114035 and Debaryomyces hansenii CBS767 : DEHA2E10494g
C2_04740C_A	orf19.193	3.54239	3.46924	3.71717	6.62682	0.560971	0.612079	Ortholog of C. dubliniensis CD36 : Cd36_19310, C. parapsilosis CDC317 : CPAR2_209710, Candida tenuis NRRL Y-1498 : CANTEDRAFT_113479 and Debaryomyces hansenii CBS767 : DEHA2C15114g
C2_04750W_A	orf19.192	12.5872	13.3839	36.1955	28.5976	1.31894	0.000848373	Ortholog of C. dubliniensis CD36 : Cd36_19320, C. parapsilosis CDC317 : CPAR2_209670, Candida tenuis NRRL Y-1498 : CANTEDRAFT_113478 and Debaryomyces hansenii CBS767 : DEHA2C15136g
C2_04770W_A	orf19.190	44.8698	43.7067	61.9802	58.4657	0.44339	0.391262	Ortholog(s) have role in endoplasmic reticulum organization, histone exchange and Swr1 complex localization
C2_04780W_A	orf19.188	60.4449	64.401	73.1704	80.9842	0.304229	0.617552	Ortholog of Candida albicans WO-1 : CAWG_04234
C2_04790C_A	orf19.185	53.1898	53.9625	44.7959	63.5536	0.0160286	0.985305	Ortholog(s) have structural constituent of ribosome activity, role in mitochondrial translational initiation and mitochondrial small ribosomal subunit localization
C2_04820W_A	orf19.182	57.5429	46.5876	35.1659	56.1581	-0.189328	0.784419	Ortholog(s) have rRNA (guanine-N1-)-methyltransferase activity, role in rRNA modification and mitochondrion localization
C2_04830W_A	orf19.4128	15.7558	17.2849	36.9856	47.6208	1.35652	0.000848373	Ortholog of C. dubliniensis CD36 : Cd36_19390, C. parapsilosis CDC317 : CPAR2_209600, Candida tenuis NRRL Y-1498 : CANTEDRAFT_134010 and Debaryomyces hansenii CBS767 : DEHA2C14960g
C2_04850C_A	orf19.4127	152.833	122.875	140.201	99.2258	-0.203554	0.764321	Ortholog(s) have actin filament binding activity, role in actin cortical patch localization, actin filament bundle assembly, endocytosis and actin cortical patch localization
C2_04870C_A	orf19.4123	87.8287	79.9264	83.2226	100.619	0.132108	0.872061	Putative THO complex subunit; possibly an essential gene, disruptants not obtained by UAU1 method; protein newly produced during adaptation to the serum
C2_04910W_A	orf19.3522	3.36699	1.98895	18.0733	5.43979	2.13425	0.267488	Protein of unknown function; flow model biofilm induced; transcript repressed by ciclopirox olamine
C2_04960C_A	orf19.3528	52.4694	57.1852	47.8795	72.479	0.134371	0.884678	Protein of unknown function; Spider biofilm induced
C2_04990W_A	orf19.3531	20.0443	15.6029	13.503	19.2185	-0.123549	0.899756	Ortholog(s) have role in regulation of DNA-dependent DNA replication initiation and DNA replication preinitiation complex, chromosome, centromeric region localization
C2_05020W_A	orf19.3533	128.61	115.234	77.6461	94.2013	-0.504835	0.3391	Ortholog(s) have role in mitochondrion organization
C2_05040C_A	orf19.3535	131.901	169.239	113.839	113.741	-0.404063	0.458408	Ortholog(s) have cellular bud neck, fungal-type vacuole localization
C2_05050C_A	orf19.3536	28.6802	32.3838	29.9345	36.8439	0.129058	0.865651	Ortholog(s) have acetylglucosaminyltransferase activity, role in protein N-linked glycosylation and Golgi medial cisterna localization
C2_05060C_A	orf19.3537	16.9464	13.407	20.8847	15.6452	0.267216	0.830888	Putative sulfiredoxin; regulated by Tsa1, Tsa1B in minimal media at 37 degrees C; flow model biofilm induced; Spider biofilm induced
C2_05080C_A	orf19.3539	30.596	18.6969	26.0045	48.4576	0.595125	0.25876	Predicted nucleolar S-adenosylmethionine-dependent rRNA methyltransferase; Spider biofilm induced
C2_05120C_A	orf19.3543	17.4714	34.648	26.157	21.5064	-0.128938	0.928219	Dubious open reading frame
C2_05130W_A	orf19.3544	38.3051	49.1406	29.4722	17.0865	-0.909337	0.0462501	Putative protein of unknown function; Hap43p-repressed gene
C2_05160C_A	orf19.3547	122.264	100.029	111.652	215.327	0.556731	0.30154	Ortholog(s) have mRNA 3'-UTR binding, translation repressor activity, mRNA regulatory element binding activity and role in negative regulation of translation, ribosomal large subunit biogenesis
C2_05170W_A	orf19.3548	66.3263	78.2114	70.3926	55.82	-0.195589	0.770847	Ortholog(s) have mitochondrial inner membrane localization
C2_05220C_A	orf19.3552	26.7385	30.0128	37.4444	47.5456	0.582638	0.233619	Ortholog(s) have structural constituent of nuclear pore activity
C2_05270W_A	orf19.3556	57.8618	56.2942	73.5732	129.08	0.828004	0.091647	Transportin or cytosolic karyopherin beta; Spider biofilm induced
C2_05290C_A	orf19.3558	166.532	152.336	73.9756	85.766	-0.997219	0.0174284	Has domain(s) with predicted role in transport and integral component of membrane localization
C2_05300C_A	orf19.3559	158.467	141.543	123.471	170.854	-0.0276071	0.975822	S. cerevisiae ortholog Mrps35p is a structural constituent of ribosome and localizes to mitochondrial small ribosomal subunit; the snoRNA CD39 is encoded within the MRPS35 intron
C2_05330C_A	orf19.3563	87.5734	62.1419	68.1287	81.5303	-0.000542983	0.999317	Ortholog of C. dubliniensis CD36 : Cd36_19810, C. parapsilosis CDC317 : CPAR2_206450, Candida tenuis NRRL Y-1498 : CANTEDRAFT_113905 and Debaryomyces hansenii CBS767 : DEHA2C05566g
C2_05350C_A	orf19.3565	2.69445	10.1866	5.92301	7.40045	0.0487163	0.971304	Ortholog of C. dubliniensis CD36 : Cd36_19830, C. parapsilosis CDC317 : CPAR2_206470, Candida tenuis NRRL Y-1498 : CANTEDRAFT_113899 and Debaryomyces hansenii CBS767 : DEHA2C05676g
C2_05380W_A	orf19.3569	128.715	123.88	122.043	174.095	0.229438	0.724767	Protein of unknown function; S. cerevisiae YLR407W mutants have abnormal budding; constitutive expression independent of MTL or white-opaque status; Spider biofilm induced
C2_05390C_A	orf19.3571	7.205	2.45546	3.39998	5.37256	-0.139096	0.95126	Ortholog of C. dubliniensis CD36 : Cd36_19870, C. parapsilosis CDC317 : CPAR2_209420, Candida tenuis NRRL Y-1498 : CANTEDRAFT_100922 and Debaryomyces hansenii CBS767 : DEHA2D11176g
C2_05400W_A	orf19.3572	6.71856	5.28104	6.89697	6.74038	0.184579	0.860414	Ortholog of C. dubliniensis CD36 : Cd36_19880, Candida tenuis NRRL Y-1498 : CANTEDRAFT_117672, Debaryomyces hansenii CBS767 : DEHA2D11154g and Pichia stipitis Pignal : PICST_59570
C2_05410W_A	orf19.3572.3	3714.71	4325.17	2921.69	3847.14	-0.248267	0.713861	Ribosomal 60S subunit protein L31B; Spider biofilm repressed
C2_05480C_A	orf19.3577.1	73.7626	83.7942	44.9603	18.3342	-1.31572	0.121149	Ortholog(s) have mitochondrial intermembrane space localization
C2_05490W_A	orf19.3578	22.3476	22.3845	11.1761	21.1922	-0.46673	0.611726	Ortholog of C. dubliniensis CD36 : Cd36_19950, C. parapsilosis CDC317 : CPAR2_104135, Candida tenuis NRRL Y-1498 : cten_CGOB_00075 and Debaryomyces hansenii CBS767 : DEHA2F07964g
C2_05510C_A	orf19.3581	7.69617	8.99784	4.67211	5.00818	-0.786208	0.256784	Ortholog(s) have histone binding activity, role in DNA replication-dependent nucleosome assembly and CAF-1 complex, cytoplasm, nucleus localization
C2_05520W_A	orf19.3582	51.6482	44.9854	39.0995	51.3091	-0.0960636	0.904748	Ortholog(s) have protein-lysine N-methyltransferase activity and role in peptidyl-lysine dimethylation, peptidyl-lysine monomethylation, vesicle-mediated transport
C2_05530C_A	orf19.3583	90.0538	77.9314	109.844	115.715	0.425168	0.429872	Ortholog(s) have role in regulation of chromatin silencing at telomere, ribosomal small subunit export from nucleus and cytosol, nuclear pore, nucleus localization
C2_05540C_A	orf19.6866	33.9987	40.0844	36.1978	45.0554	0.133282	0.862611	Putative U1-70K component of the U1 snRNP, involved in splicing; ortholog of S. cerevisiae SNP1; downregulated upon adherence to polystyrene
C2_05550W_A	orf19.6867	131.307	122.531	145.44	107.608	-0.0044928	0.995176	Protein with a predicted cytochrome b5-like heme/steroid binding domain; repressed by alpha pheromone in SpiderM medium
C2_05560W_A	orf19.6868	18.1446	30.2258	14.359	10.6706	-0.950491	0.0684895	Putative NADPH-dependent methylglyoxal reductase; homozygous transposon insertion causes decreased colony wrinkling under filamentous growth-inducing conditions, but does not block true hyphal formation in liquid media
C2_05570C_A	orf19.6869	35.1525	37.6988	73.9145	57.0185	0.845802	0.0537312	Putative lipid raft associated protein; Spider biofilm induced
C2_05580W_A	orf19.6871	30.4256	27.7732	36.9684	46.4364	0.51914	0.301741	Protein of unknown function; Hap43-induced; flow model biofilm repressed
C2_05590C_A	orf19.6872	24.3601	19.3973	38.4958	67.9436	1.28243	0.00392336	Putative protein of unknown function; Hap43p-repressed gene
C2_05640W_A	orf19.6874	77.5767	59.2511	62.9508	60.3724	-0.149916	0.83837	Putative helix-loop-helix (HLH) transcription factor with a role in filamentous growth
C2_05670C_A	orf19.6879	9.32888e-96	9.26173e-151	4.9824e-159	3.83629e-65	101.698	1	Ortholog(s) have tRNA-intron endonuclease activity, role in tRNA-type intron splice site recognition and cleavage and tRNA-intron endonuclease complex localization
C2_05710C_A	orf19.6882.1	4856.98	4146.56	3377.49	4604.44	-0.173754	0.825026	Ribosomal 60S subunit protein; Spider biofilm repressed
C2_05720C_A	orf19.6883	73.1456	91.2179	131.042	99.355	0.487235	0.351077	Putative oxysterol binding protein family; probable peripheral membrane protein of the Golgi complex; flow model and Spider biofilm repressed
C2_05750W_A	orf19.6886	213.475	174.674	172.427	318.309	0.338335	0.59407	Ortholog(s) have rRNA binding activity, role in maturation of LSU-rRNA from tricistronic rRNA transcript (SSU-rRNA, 5.8S rRNA, LSU-rRNA), ribosomal large subunit export from nucleus and nucleolus localization
C2_05760C_A	orf19.6887	916.381	776.682	536.749	433.77	-0.802807	0.0699419	Predicted ORF from Assembly 19; repressed by nitric oxide; removed from Assembly 20; subsequently reinstated in Assembly 21 based on comparative genome analysis
C2_05770W_A	orf19.6888	50.7696	32.1593	92.9848	97.2769	1.19804	0.00338059	Zn(II)2Cys6 domain transcription factor; regulated by Mig1 and Tup1; rat catheter and Spider biofilm induced
C2_05800C_A	orf19.6893	34.1386	42.0784	27.7412	23.8731	-0.562342	0.245252	Ortholog(s) have GTPase binding activity, role in ER to Golgi vesicle-mediated transport and Golgi membrane localization
C2_05810W_A	orf19.5204	23.0414	21.0728	44.1088	38.2234	0.900212	0.0388734	Ortholog(s) have role in cellular response to methylmercury
C2_05820W_A	orf19.5205	40.8557	33.6757	51.2196	72.3012	0.728832	0.116622	Protein of unknown function; Hap43-repressed gene
C2_05830C_A	orf19.5206	50.7265	44.3957	59.5076	85.4775	0.608051	0.199015	Putative chaperone protein; role in the assembly of box H/ACA snoRNPs and thus for pre-rRNA processing; Spider biofilm induced
C2_05840W_A	orf19.5207	63.1131	49.9037	47.6405	97.2757	0.358682	0.652838	Predicted diphthamide biosynthesis protein; Spider biofilm induced
C2_05850C_A	orf19.5209	16.2029	17.2285	14.9526	12.4119	-0.288899	0.852158	Ortholog(s) have role in intra-Golgi vesicle-mediated transport, protein localization by the Cvt pathway and Golgi transport complex localization
C2_05860C_A	orf19.5210	12.4946	15.1716	17.4472	8.16184	-0.111474	0.897307	Putative Xbp1 transcriptional repressor; binds to cyclin gene promoters in S. cerevisiae; Hap43-repressed; possibly essential, disruptants not obtained by UAU1 method
C2_05870W_A	orf19.5210.1	49.3787	55.421	62.8661	29.1397	-0.187838	0.893811	Protein conserved in C. dublinensis
C2_05900W_A	orf19.5212	0.263124	0.466297	0.807079	1.16905	1.43785	1	Ortholog(s) have SUMO transferase activity, chromatin binding activity, role in protein sumoylation, reciprocal meiotic recombination, synaptonemal complex assembly and condensed nuclear chromosome localization
C2_05910W_A	orf19.5213	22.326	27.9943	36.7841	35.9428	0.531349	0.275943	Putative protein of unknown function; transcript is upregulated in clinical isolates from HIV+ patients with oral candidiasis
C2_05960C_A	orf19.5216	1.87326	1.35807	6.3988	8.25405	2.18098	0.0530026	Ortholog of C. parapsilosis CDC317 : CPAR2_209840, C. dubliniensis CD36 : Cd36_20380, Lodderomyces elongisporus NRLL YB-4239 : LELG_00983 and Candida orthopsilosis Co 90-125 : CORT_0A09100
C2_05980C_A	orf19.4122	90.5225	91.5148	37.2697	45.8872	-1.13033	0.00545557	Ortholog(s) have acyl-CoA hydrolase activity, role in fatty acid beta-oxidation and peroxisome localization
C2_05990C_A	orf19.4121	47.5267	42.2223	39.5848	63.1522	0.194989	0.776913	Predicted thioesterase/thiol ester dehydrase-isomerase; Spider biofilm induced
C2_06030W_A	orf19.4117	17.653	19.0424	18.6866	19.9954	0.0760648	0.929375	Ortholog of C. dubliniensis CD36 : Cd36_20450, C. parapsilosis CDC317 : CPAR2_104160, Candida tenuis NRRL Y-1498 : CANTEDRAFT_95516 and Debaryomyces hansenii CBS767 : DEHA2F05192g
C2_06040C_A	orf19.4116	3.64633	3.81838	5.08381	4.5522	0.368351	0.717931	Ortholog(s) have N-acetyltransferase activity, role in response to drug and nuclear envelope, plasma membrane localization
C2_06060C_A	orf19.4115	0	0	1.38874	2.19445	inf	0.0867909	Ortholog of Candida albicans WO-1 : CAWG_04349
C2_06080C_A	orf19.4112	52.5613	44.3766	60.3312	58.6156	0.295184	0.614473	Ortholog(s) have 8-oxo-dGDP phosphatase activity, thiamine diphosphokinase activity and role in thiamine biosynthetic process
C2_06090W_A	orf19.4110	16.1771	17.6586	28.4913	39.4648	1.00606	0.0174284	Ortholog of C. dubliniensis CD36 : Cd36_20490, C. parapsilosis CDC317 : CPAR2_104180, Candida tenuis NRRL Y-1498 : CANTEDRAFT_116074 and Debaryomyces hansenii CBS767 : DEHA2F05148g
C2_06110W_A	orf19.4107	30.6212	38.7164	37.2988	33.3938	0.0279213	0.97562	Exopolyphosphatase, hydrolyzes inorganic polyphosphate (poly P) into Pi residues; Spider biofilm repressed
C2_06120C_A	orf19.4106	9.09938	9.92341	11.4863	17.076	0.586379	0.348055	Ortholog(s) have ubiquitin conjugating enzyme binding activity and role in mRNA polyadenylation, pre-mRNA cleavage required for polyadenylation, proteasome-mediated ubiquitin-dependent protein catabolic process
C2_06140C_A	orf19.4104	0.589605	0.522437	1.35637	1.29279	1.25232	0.374382	Ortholog of C. dubliniensis CD36 : Cd36_20540, C. parapsilosis CDC317 : CPAR2_104860, Candida tenuis NRRL Y-1498 : CANTEDRAFT_116071 and Pichia stipitis Pignal : PICST_32327
C2_06160W_A	orf19.4101	43.7557	63.9721	52.0071	57.4378	0.0228132	0.984448	Ortholog of C. parapsilosis CDC317 : CPAR2_104840, Candida tenuis NRRL Y-1498 : CANTEDRAFT_116070, Debaryomyces hansenii CBS767 : DEHA2F04994g and Pichia stipitis Pignal : psti_CGOB_00085
C2_06200C_A	orf19.5483	34.1077	37.8222	36.0204	39.732	0.0747012	0.929076	Ortholog(s) have GTPase activity, ribosome binding activity, role in positive regulation of translation and mitochondrial matrix, mitochondrial ribosome localization
C2_06230W_A	orf19.5486	23.61	28.3857	32.6787	33.9109	0.356905	0.530782	Putative endoribonuclease; heterozygous null mutant exhibits hypersensitivity to parnafungin and cordycepin in the C. albicans fitness test
C2_06260W_A	orf19.5488	10.5934	20.4493	14.5058	11.0024	-0.283289	0.800744	Ortholog(s) have mitochondrial inner membrane, mitochondrial large ribosomal subunit localization
C2_06270W_A	orf19.5489	6.77396	9.47725	4.10087	5.18407	-0.807582	0.339995	Ortholog of C. dubliniensis CD36 : Cd36_20660, C. parapsilosis CDC317 : CPAR2_104730, Candida tenuis NRRL Y-1498 : CANTEDRAFT_133951 and Debaryomyces hansenii CBS767 : DEHA2F02068g
C2_06280C_A	orf19.5491	3.10866	5.72092	2.3838	3.8634	-0.499136	0.70813	Ortholog of C. dubliniensis CD36 : Cd36_20670, C. parapsilosis CDC317 : CPAR2_104720, Candida tenuis NRRL Y-1498 : CANTEDRAFT_103989 and Debaryomyces hansenii CBS767 : DEHA2F02046g
C2_06300W_A	orf19.5492	41.7212	63.4342	26.5395	26.4261	-0.989395	0.0931294	Ortholog(s) have mRNA binding, pre-mRNA 5'-splice site binding activity, role in mRNA 5'-splice site recognition and U1 snRNP, U2-type prespliceosome, commitment complex localization
C2_06320W_A	orf19.5495	30.6268	43.4204	33.2045	34.6992	-0.124956	0.873475	Putative RNA-binding protein; induced by alpha pheromone in SpiderM medium
C2_06350C_A	orf19.5499	0.476217	0.168786	0.58428	1.0002	1.29663	1	Ortholog(s) have 4-hydroxyphenylpyruvate dioxygenase activity and role in aromatic amino acid family biosynthetic process
C2_06430C_A	orf19.21	39.9588	32.4107	21.2133	19.8641	-0.817038	0.169426	Ortholog(s) have role in ethanol metabolic process and mitochondrial inner membrane localization
C2_06440C_A	orf19.22	226.709	189.459	49.2563	78.821	-1.70015	0.000848373	Protein with homology to peroxisomal membrane proteins; Sef1p-, Sfu1p-, and Hap43p-regulated gene
C2_06450C_A	orf19.22.1	0.493098	0.291283	1.13436	0.929437	1.39567	0.513983	Pseudogene; added to Assembly 21 based on comparative genome analysis
C2_06480W_A	orf19.25	47.1747	42.6175	61.0375	93.8431	0.786495	0.073906	Ortholog(s) have tRNA (guanine(9)-N(1))-methyltransferase activity and role in tRNA N1-guanine methylation
C2_06490W_A	orf19.26	15.7106	19.5529	33.1071	29.1607	0.820308	0.082569	Putative peptide N-glycanase; induced by nitric oxide independent of Yhb1p
C2_06510W_A	orf19.27	43.4173	33.951	59.6326	48.3512	0.481001	0.349315	Ortholog of C. dubliniensis CD36 : Cd36_20860, C. parapsilosis CDC317 : CPAR2_104250, Candida tenuis NRRL Y-1498 : CANTEDRAFT_115100 and Debaryomyces hansenii CBS767 : DEHA2E10450g
C2_06520C_A	orf19.28	83.0478	62.4148	40.2209	76.5932	-0.316434	0.604774	Putative thiamine transmembrane transporter; Spider biofilm induced
C2_06530W_A	orf19.29	129.692	113.964	116.89	181.356	0.291655	0.625988	Ortholog of S. cerevisiae Tah11, a DNA replication licensing factor required for pre-replication complex assembly; rat catheter, flow model and Spider biofilm induced
C2_06550W_A	orf19.31	9.40746	7.95685	19.6742	7.59945	0.651383	0.399267	Ortholog of C. parapsilosis CDC317 : CPAR2_201960, C. dubliniensis CD36 : Cd36_20900, Candida tropicalis MYA-3404 : CTRG_04756 and Candida albicans WO-1 : CAWG_04394
C2_06570C_A	orf19.33	325.476	411.712	1560.33	1194.03	1.90161	0.000848373	Predicted ORF from Assembly 19; removed from Assembly 20; restored based on transcription data; similar to orf19.7550
C2_06600W_A	orf19.35	397.921	348.832	268.769	242.832	-0.545614	0.324411	Predicted kinase; rat catheter, flow model, Spider biofilm induced
C2_06610C_A	orf19.35.1	373.786	389.652	396.222	339.248	-0.0538446	0.953411	Protein of unknown function
C2_06620W_A	orf19.36	1.75804	3.79704	2.27493	2.75157	-0.144254	0.922968	Component of the conserved oligomeric Golgi complex; predicted to mediate fusion of transport vesicles to Golgi compartments; clade-associated gene expression
C2_06630C_A	orf19.36.1	311.021	258.988	149.421	105.947	-1.15841	0.0953708	Ortholog of C. parapsilosis CDC317 : CPAR2_104640 and Candida orthopsilosis Co 90-125 : CORT_0B05695
C2_06650C_A	orf19.1296	17.0817	18.7461	17.6051	35.8261	0.576606	0.24575	Ortholog(s) have role in spliceosomal snRNP assembly and U4/U6 x U5 tri-snRNP complex localization
C2_06660W_A	orf19.81	24.928	20.7077	23.5956	53.3319	0.753337	0.149956	Ortholog(s) have role in exonucleolytic trimming to generate mature 3'-end of 5.8S rRNA from tricistronic rRNA transcript (SSU-rRNA, 5.8S rRNA and LSU-rRNA), more
C2_06710W_A	orf19.3151	12.4607	10.8246	13.0212	13.6185	0.194161	0.816607	Has domain(s) with predicted catalytic activity, coenzyme binding activity and role in cellular metabolic process
C2_06740W_A	orf19.3148	23.9574	22.6785	23.3157	25.6037	0.0689672	0.931557	Protein of unknown function; possibly an essential gene, disruptants not obtained by UAU1 method
C2_06750C_A	orf19.3147	6.81316	7.78967	13.3141	16.1562	1.01301	0.165279	Ortholog of C. dubliniensis CD36 : Cd36_21050, C. parapsilosis CDC317 : CPAR2_104310, Candida tenuis NRRL Y-1498 : CANTEDRAFT_104515 and Debaryomyces hansenii CBS767 : DEHA2F01650g
C2_06760C_A	orf19.2227	6.08641	7.88981	2.42003	3.00463	-1.36537	0.0585385	Protein of unknown function; flow model biofilm induced; nitric oxide-repressed
C2_06770W_A	orf19.2228	10.5593	15.5254	10.7665	9.93597	-0.333402	0.652267	Ortholog(s) have actin filament binding, actin monomer binding activity
C2_06780C_A	orf19.2229	7.2782	7.60844	16.4925	16.8455	1.16315	0.0193848	Ortholog(s) have ubiquitin-protein transferase activity, role in protein ubiquitination, response to ethanol, septin ring assembly and cytoplasm, nucleus localization
C2_06790W_A	orf19.2230	17.3502	21.3894	13.3046	24.9845	-0.0168782	0.992448	Putative pre-mRNA-splicing factor; decreased transcription is observed upon benomyl treatment
C2_06800C_A	orf19.2231	9.42519	15.432	52.3206	53.9585	2.09612	0.000848373	Protein of unknown function; Spider biofilm induced
C2_06850W_A	orf19.2237.1	80.2714	61.3706	66.2874	146.891	0.589812	0.490823	Ortholog of Slx9 required for pre-rRNA processing; associated with 90S pre-ribosome and 43S small ribosomal subunit precursor, interacts with U3 snoRNA in S. cerevisiae; gene has intron; Spider biofilm induced
C2_06890C_A	orf19.2244	2.65375	2.21311	13.2871	8.32272	2.15062	0.0163585	Similar to oxidoreductases and to S. cerevisiae Yjr096wp; Sfu1 repressed; induced by benomyl treatment, Ssr1; Hap43-repressed; flow model biofilm repressed
C2_06920C_A	orf19.2246	117.812	107.526	44.6917	50.2752	-1.24659	0.00219792	Ortholog of S. cerevisiae : YPL199C, C. glabrata CBS138 : CAGL0G09108g, C. dubliniensis CD36 : Cd36_21210, C. parapsilosis CDC317 : CPAR2_406880 and Candida tenuis NRRL Y-1498 : CANTEDRAFT_112208
C2_06930C_A	orf19.2247	9.54394	9.24702	4.24064	6.05247	-0.868359	0.156697	Ortholog of C. parapsilosis CDC317 : CPAR2_406700, C. dubliniensis CD36 : Cd36_21220, Candida tenuis NRRL Y-1498 : CANTEDRAFT_127772 and Candida orthopsilosis Co 90-125 : CORT_0C06120
C2_06950C_A	orf19.2249	58.2062	61.5641	41.4584	36.4262	-0.62086	0.208044	Putative metalloprotease of the mitochondrial inner membrane; expression downregulated in an ssr1 null mutant
C2_06980W_A	orf19.2252	0	0.156648	0.542261	0.499839	2.7339	1	Protein of unknown function; rat catheter biofilm repressed
C2_06990W_A	orf19.2253	84.6885	74.1133	65.6769	36.4959	-0.636215	0.184957	Protein of unknown function; expression regulated by white-opaque switch; repressed by alpha pheromone in SpiderM medium; Spider biofilm induced
C2_07000W_A	orf19.2256	89.0611	74.2102	66.8137	98.0708	0.0141835	0.986162	Ortholog of S. cerevisiae : YCR051W, C. glabrata CBS138 : CAGL0C03003g, C. dubliniensis CD36 : Cd36_21290, C. parapsilosis CDC317 : CPAR2_406670 and Candida tenuis NRRL Y-1498 : CANTEDRAFT_113636
C2_07010W_A	orf19.2257	120.193	111.3	90.8795	60.9529	-0.60849	0.470289	Predicted ER protein involved in ER-nucleus signaling; Spider biofilm repressed
C2_07020C_A	orf19.2258	8.30037	9.4866	17.9878	23.7109	1.22918	0.547047	Ortholog of C. dubliniensis CD36 : Cd36_21310, C. parapsilosis CDC317 : CPAR2_406650, Candida tenuis NRRL Y-1498 : CANTEDRAFT_130046 and Debaryomyces hansenii CBS767 : DEHA2F24134g
C2_07030C_A	orf19.2259	102.784	85.0941	74.381	100.166	-0.106184	0.891493	Ortholog(s) have structural constituent of ribosome activity and mitochondrial large ribosomal subunit localization
C2_07040W_A	orf19.2260	25.6024	24.5762	26.7903	50.6276	0.625593	0.209871	Putative transcription factor with zinc finger DNA-binding motif
C2_07060W_A	orf19.2261	42.8231	40.1233	35.9802	44.0275	-0.0520418	0.953776	Ortholog(s) have RNA binding activity, role in mRNA splicing, via spliceosome and U2 snRNP, U2-type prespliceosome localization
C2_07070W_A	orf19.2262	21.2195	18.2524	72.6038	74.5798	1.89872	0.000848373	Protein similar to quinone oxidoreductases; induced by benomyl treatment, nitric oxide; oxidative stress-induced via Cap1; stationary-phase enriched protein; Spider biofilm induced
C2_07080C_A	orf19.2263	75.5298	65.9915	51.7222	56.4733	-0.387379	0.521936	Ortholog of C. dubliniensis CD36 : Cd36_21360, C. parapsilosis CDC317 : CPAR2_406560, Candida tenuis NRRL Y-1498 : CANTEDRAFT_103408 and Debaryomyces hansenii CBS767 : DEHA2F24024g
C2_07100W_A	orf19.2265	59.1992	61.6456	53.8742	47.5846	-0.252261	0.69104	Ortholog(s) have DNA translocase activity, role in positive regulation of transcription from RNA polymerase II promoter in response to amino acid starvation and SWI/SNF complex, cytosol localization
C2_07110C_A	orf19.2266	23.4559	30.6961	28.2646	26.3189	0.0114518	0.987867	Ortholog(s) have ATPase activity, DNA binding, nucleosome binding activity, role in sister chromatid cohesion and Isw1a complex localization
C2_07140W_A	orf19.2269	24.0906	31.7255	31.3537	25.1738	0.0182738	0.98519	Putative 3-phosphoserine phosphatase; induced by benomyl or in azole-resistant strain that overexpresses MDR1; early-stage flow model biofilm induced; Spider biofilm repressed
C2_07180W_A	orf19.2274	1.95615	5.5851	1.6667	1.75578	-1.13976	0.349574	Ortholog of C. dubliniensis CD36 : Cd36_21450, Candida tropicalis MYA-3404 : CTRG_01739 and Candida albicans WO-1 : CAWG_05814
C2_07190C_A	orf19.2275	253.729	244.374	137.888	170.507	-0.691664	0.136503	Putative mitochondrial ribosomal protein; predicted role in aerobic respiration; Spider biofilm repressed
C2_07200W_A	orf19.2276	98.0065	101.443	88.4554	126.113	0.105411	0.908701	Ortholog(s) have DNA-directed 5'-3' RNA polymerase activity, RNA-directed 5'-3' RNA polymerase activity
C2_07220W_A	orf19.2278	64.1018	63.3462	85.1404	73.5596	0.316395	0.58074	Putative 20S proteasome assembly protein; filament induced; induced by alpha pheromone in SpiderM medium
C2_07240C_A	orf19.2281	6.99497	8.29096	11.8424	10.0537	0.51847	0.408101	Ortholog(s) have mitochondrion localization
C2_07250C_A	orf19.2282	5.38463	4.7712	15.5987	13.4118	1.51426	0.0276514	Ortholog(s) have cytoplasm localization
C2_07270W_A	orf19.2284	56.8369	60.7419	28.2797	19.9776	-1.28481	0.00392336	Protein with an FMN-binding domain; Hap43-repressed; flow model biofilm induced
C2_07280W_A	orf19.2285	1.82033	1.4727	2.36691	3.00489	0.705995	0.473362	Protein of unknown function; transcription induced by benomyl treatment
C2_07290W_A	orf19.2286	333.824	270.52	323.647	415.388	0.290271	0.653483	Putative deoxyhypusine hydroxylase; ketoconazole-induced; protein level decreases in stationary phase cultures; required for biofilm formation; Spider biofilm repressed
C2_07360W_A	orf19.1900	30.6363	32.1733	27.6982	48.1982	0.273046	0.661165	Ortholog(s) have RNA methyltransferase activity, role in 7-methylguanosine cap hypermethylation, meiotic cell cycle, nucleologenesis, regulation of telomere maintenance via telomerase, tRNA processing and nucleolus localization
C2_07370W_A	orf19.1897	20.7338	19.0009	25.0467	33.1538	0.55063	0.304524	Ortholog of C. dubliniensis CD36 : Cd36_21640, C. parapsilosis CDC317 : CPAR2_105040, Candida tenuis NRRL Y-1498 : CANTEDRAFT_112352 and Debaryomyces hansenii CBS767 : DEHA2C08008g
C2_07390C_A	orf19.1893	29.8545	26.8397	23.3945	18.9678	-0.42042	0.442256	Protein of unknown function; Spider biofilm repressed
C2_07410W_A	orf19.1890	17.5655	18.876	52.5889	48.305	1.46919	0.000848373	Ortholog(s) have acylglycerol lipase activity, triglyceride lipase activity and role in medium-chain fatty acid biosynthetic process, triglyceride metabolic process
C2_07420W_A	orf19.1889	90.734	99.3382	73.2391	66.4991	-0.443822	0.397427	Putative phosphoglycerate mutase family protein; stationary phase enriched protein; early-stage flow model biofilm induced; Spider biofilm repressed
C2_07430C_A	orf19.1888	221.219	197.607	121.807	97.628	-0.932554	0.0361037	Putative nicotinamide riboside hydrolase; cleaves N-glycosidic bonds in nucleosides; pyrimidine salvage and nicotinamide riboside salvage pathways; Spider biofilm induced
C2_07440C_A	orf19.1887	19.1167	23.7006	15.4434	13.5362	-0.563155	0.270264	Ortholog(s) have sterol esterase activity, role in sterol metabolic process and integral component of membrane, lipid droplet localization
C2_07510W_A	orf19.1877	20.2482	19.992	24.6951	15.5779	0.00117229	0.99856	Has domain(s) with predicted nucleic acid binding activity
C2_07520C_A	orf19.1876	49.6551	37.0274	46.6166	62.1487	0.327406	0.61729	Ortholog(s) have mRNA binding activity, role in mRNA splice site selection, positive regulation of mRNA splicing, via spliceosome and U1 snRNP, U2-type prespliceosome, commitment complex, cytoplasm localization
C2_07530C_A	orf19.1874	0.31219	1.1065	0.957579	0.336254	-0.132906	1	Ortholog(s) have protein serine/threonine kinase activity
C2_07540W_A	orf19.1873	315.119	312.919	279.137	214.325	-0.347913	0.522366	Protein of unknown function; Hap43-repressed gene; repressed by nitric oxide
C2_07550W_A	orf19.1872	355.177	374.51	280.32	200.4	-0.602084	0.214087	Plasma membrane protein; repressed by nitric oxide
C2_07580W_A	orf19.1867	27.3696	33.1754	33.7984	24.1195	-0.0640012	0.939903	Putative malate permease; induced during macrophage infection; regulated by Gcn2 and Gcn4; putative peroxisome targeting signal; Hap43-repressed; Spider biofilm induced
C2_07610C_A	orf19.1864	22.5025	24.75	30.8101	30.1176	0.366706	0.493944	Ortholog(s) have role in rescue of stalled ribosome, ribosome-associated ubiquitin-dependent protein catabolic process and RQC complex, cytosolic large ribosomal subunit localization
C2_07620W_A	orf19.1863	2.53292	1.58426	1.59954	0.722159	-0.826471	0.421835	Has domain(s) with predicted Rho guanyl-nucleotide exchange factor activity, role in regulation of Rho protein signal transduction and intracellular localization
C2_07630C_A	orf19.1862	314.796	287.953	209.617	103.363	-0.94549	0.0342739	Possible stress protein; increased transcription associated with CDR1 and CDR2 overexpression or fluphenazine treatment; regulated by Sfu1, Nrg1, Tup1; stationary phase enriched protein; Spider biofilm induced
C2_07640W_A	orf19.1861	46.8201	44.2395	90.7589	58.0733	0.708802	0.12433	BAR domain-containing protein, forms heterodimer with Rvs162p that binds liposomes in vitro; flow model biofilm induced
C2_07650C_A	orf19.1860.1	32.829	41.3187	25.4765	15.9277	-0.840626	0.0658538	Ortholog(s) have extracellular region localization
C2_07680W_A	orf19.2214	101.923	103.938	93.7889	99.2352	-0.0928944	0.902636	Ortholog(s) have structural constituent of ribosome activity and mitochondrial large ribosomal subunit localization
C2_07690W_A	orf19.2213	9.75772	9.18649	7.40452	6.89709	-0.405579	0.583484	Ortholog(s) have role in negative regulation of telomere maintenance, positive regulation of helicase activity and chromosome, telomeric region, site of double-strand break localization
C2_07700C_A	orf19.2212	31.4867	29.6996	13.2407	11.4869	-1.30709	0.186454	Ortholog of C. dubliniensis CD36 : Cd36_21980, Debaryomyces hansenii CBS767 : DEHA2F19734g, Pichia stipitis Pignal : psti_CGOB_00208 and Spathaspora passalidarum NRRL Y-27907 : spas_CGOB_00029
C2_07710W_A	orf19.2211	0.184691	0.16365	1.55788	0.745976	2.72548	0.427438	Ortholog of C. dubliniensis CD36 : Cd36_21990, C. parapsilosis CDC317 : CPAR2_103660, Debaryomyces hansenii CBS767 : DEHA2F19756g and Pichia stipitis Pignal : PICST_61375
C2_07720C_A	orf19.2210	52.5736	44.0908	67.6817	47.1195	0.248081	0.696773	Protein of unknown function; Spider biofilm induced
C2_07740W_A	orf19.2208	101.669	100.239	129.703	128.191	0.353085	0.570928	Ortholog(s) have role in response to salt stress
C2_07760W_A	orf19.2204	42.6041	32.308	66.1415	68.5155	0.846017	0.0483801	Predicted membrane protein of unknown function; Spider biofilm induced
C2_07770C_A	orf19.2203.1	20.6686	16.1594	35.4276	13.7499	0.417195	0.781751	Ortholog of C. parapsilosis CDC317 : CPAR2_103590, Debaryomyces hansenii CBS767 : DEHA2C08118g, Pichia stipitis Pignal : psti_CGOB_00124 and Spathaspora passalidarum NRRL Y-27907 : SPAPADRAFT_49916
C2_07780W_A	orf19.2203	0	5.39994	7.00977	0	0.376425	0.95071	Ortholog of Candida albicans WO-1 : CAWG_05873
C2_07790C_A	orf19.2202	6.78289	10.8183	10.2292	11.8718	0.328438	0.733646	Protein of unknown function; induced by alpha pheromone in SpiderM medium
C2_07800W_A	orf19.2201	169.126	144.48	73.8236	109.998	-0.770644	0.147304	Ortholog(s) have ribosome binding activity, role in mitochondrial respiratory chain complex III assembly, positive regulation of mitochondrial translation and Cbp3p-Cbp6 complex, mitochondrial ribosome localization
C2_07810W_A	orf19.2200	53.7272	57.0523	34.9868	29.451	-0.781713	0.0735529	Protein of unknown function; rat catheter biofilm repressed
C2_07840W_A	orf19.2197	0	0	0.55729	0.220154	inf	1	Has domain(s) with predicted N,N-dimethylaniline monooxygenase activity, NADP binding, flavin adenine dinucleotide binding activity and role in oxidation-reduction process
C2_07860W_A	orf19.2196	32.1191	31.9725	31.1717	30.8671	-0.0469638	0.957345	Ortholog(s) have ubiquitin binding activity
C2_07870C_A	orf19.2195	0.000279027	0.000220604	0.0177646	0.0192257	6.21014	1	Ortholog of Candida albicans WO-1 : CAWG_05881
C2_07910C_A	orf19.2191.1	282.015	435.851	316.841	466.226	0.125421	0.909557	Ortholog of C. dubliniensis CD36 : Cd36_11730, C. parapsilosis CDC317 : CPAR2_104195, Candida tenuis NRRL Y-1498 : CANTEDRAFT_109454 and Debaryomyces hansenii CBS767 : DEHA2C10076g
C2_07920W_A	orf19.2191	43.4409	45.0119	27.2352	32.9202	-0.556213	0.271618	Ortholog(s) have diphthine methylesterase activity, role in endocytic recycling, peptidyl-diphthamide biosynthetic process from peptidyl-histidine and endosome localization
C2_07980W_A	orf19.2184	36.7161	38.8851	25.4734	17.9371	-0.800367	0.104903	Putative fumarylacetoacetate hydrolase; clade-associated gene expression; rat catheter and Spider biofilm repressed
C2_08020C_A	orf19.2180	56.8517	54.6371	76.7928	61.4332	0.31013	0.679895	Ortholog(s) have calcium ion binding, zinc ion binding activity, role in axial cellular bud site selection, bipolar cellular bud site selection, regulation of COPII vesicle coating and cellular bud neck, cytosol localization
C2_08030W_A	orf19.2181	38.4955	25.4192	168.318	100.101	2.07027	0.0383732	Ortholog of Spathaspora passalidarum NRRL Y-27907 : spas_CGOB_00067 and Candida albicans WO-1 : CAWG_05895
C2_08060W_A	orf19.2178.1	231.77	164.293	153.119	95.0536	-0.67439	0.404663	Protein of unknown function; Spider biofilm induced
C2_08090W_A	orf19.2177	38.6655	29.9797	62.523	30.9701	0.445701	0.725348	Sef1p-, Sfu1p-, and Hap43p-regulated gene; overlaps IFM3/orf19.2176
C2_08100W_A	orf19.2175	206.65	154.178	1361.93	667.313	2.49156	0.000848373	Mitochondrial apoptosis-inducing factor; induced by nitric oxide; Spider biofilm induced; rat catheter biofilm repressed
C2_08150W_A	orf19.2169	2.15897	1.70046	0.551852	0.581348	-1.76799	0.360302	Ortholog of C. parapsilosis CDC317 : CPAR2_805720, C. dubliniensis CD36 : Cd36_22330, Lodderomyces elongisporus NRLL YB-4239 : LELG_02628 and Candida orthopsilosis Co 90-125 : CORT_0C03440
C2_08160C_A	orf19.2168.3	334.446	450.274	354.947	452.481	0.0411556	0.96517	Ortholog(s) have role in ER-dependent peroxisome organization, endoplasmic reticulum inheritance, endoplasmic reticulum tubular network membrane organization and nuclear pore complex assembly, more
C2_08170W_A	orf19.2168	8.90233	8.4385	9.8429	6.43881	-0.0909208	0.930671	Putative sterol deacetylase; flow model biofilm induced; rat catheter biofilm repressed
C2_08180C_A	orf19.2167	100.311	94.7077	111.35	212.22	0.730463	0.129112	Ortholog(s) have role in ribosomal large subunit biogenesis, ribosomal small subunit biogenesis and cytosolic large ribosomal subunit, nucleolus localization
C2_08200W_A	orf19.2165	2.08159e-07	6.49137e-08	1.12335e-05	3.52299e-05	7.41066	1	Predicted hydrolase; induced by nitric oxide
C2_08260W_A	orf19.2220	590.944	543.471	163.592	112.88	-2.03674	0.000848373	Protein of unknown function; Hap43-repressed gene; by Rgt1; repressed in Spider biofilms by Bcr1, Tec1, Brg1, Rob1 and induced by Efg1, Ndt80; Spider biofilm induced
C2_08270C_A	orf19.2222	111.813	89.8846	94.9549	151.016	0.286296	0.643844	Putative casein kinase; plasma membrane-localized
C2_08300C_A	orf19.1353	969.19	853.108	2453.16	1117.23	0.970321	0.0479282	Protein of unknown function; repressed by yeast-hypha switch; Ras1-regulated; oral infection induced; mutants defective in damage to oral epithelium; flow model biofilm induced; Spider biofilm induced
C2_08320C_A	orf19.1351	29.2182	22.0446	7.98602	11.9182	-1.36484	0.0433538	Ortholog of C. parapsilosis CDC317 : CPAR2_407000, C. dubliniensis CD36 : Cd36_22440, Candida tenuis NRRL Y-1498 : cten_CGOB_00049 and Lodderomyces elongisporus NRLL YB-4239 : LELG_02401
C2_08330W_A	orf19.1350	111.778	111.935	102.447	126.39	0.032675	0.970379	Protein with a thioredoxin domain; predicted role in cell redox homeostasis; rat catheter and Spider biofilm induced
C2_08340C_A	orf19.1349	2.98873	7.50338	7.63945	3.21911	0.0495268	0.984769	Ortholog of C. dubliniensis CD36 : Cd36_22470, Candida tropicalis MYA-3404 : CTRG_01829 and Candida albicans WO-1 : CAWG_05920
C2_08350C_A	orf19.1348	0.655747	0.290522	1.00569	0	0.0878583	1	Ortholog of C. dubliniensis CD36 : Cd36_22500, Candida tropicalis MYA-3404 : CTRG_01825 and Candida albicans WO-1 : CAWG_05921
C2_08380C_A	orf19.1434	8.61952	10.0579	8.93701	12.7981	0.218729	0.763044	Ortholog(s) have protein kinase activator activity, protein-containing complex scaffold activity
C2_08390W_A	orf19.1433	51.3758	62.3169	81.9004	41.5983	0.119355	0.877432	Protein of unknown function; Hap43-repressed; colony morphology-related gene regulation by Ssn6; Spider biofilm induced
C2_08400C_A	orf19.1433.1	0	0	0	0	0	1	Ortholog of C. dubliniensis CD36 : Cd36_22550, Candida tropicalis MYA-3404 : CTRG_01836 and Candida albicans WO-1 : CAWG_01505
C2_08420W_A	orf19.3639	20.5595	28.9049	28.0627	22.8086	0.0404612	0.966015	Ortholog(s) have DNA-3-methyladenine glycosylase activity, damaged DNA binding activity, role in DNA dealkylation involved in DNA repair, base-excision repair, AP site formation and cytoplasm, nucleus localization
C2_08440W_A	orf19.3637	1.0157	0	0	2.46148	1.27705	1	Dubious open reading frame
C2_08450W_A	orf19.3635	15.67	16.0282	24.9799	27.908	0.738537	0.0934725	Ortholog of C. dubliniensis CD36 : Cd36_22580, C. parapsilosis CDC317 : CPAR2_406960, Candida tenuis NRRL Y-1498 : CANTEDRAFT_113677 and Debaryomyces hansenii CBS767 : DEHA2D03608g
C2_08460C_A	orf19.3633	13.6684	8.44116	11.1165	8.36473	-0.182586	0.895112	Ortholog(s) have role in purine nucleobase catabolic process
C2_08510W_A	orf19.3627	7.54796	7.49876	28.4136	35.2906	2.08194	0.00156339	Ortholog of C. dubliniensis CD36 : Cd36_22640, C. parapsilosis CDC317 : CPAR2_406910, Candida tenuis NRRL Y-1498 : CANTEDRAFT_104937 and Debaryomyces hansenii CBS767 : DEHA2D02706g
C2_08520C_A	orf19.3626.1	91.2667	56.6086	48.9899	51.6084	-0.555776	0.775673	Ortholog of C. parapsilosis CDC317 : CPAR2_406905, Candida orthopsilosis Co 90-125 : CORT_0C06265 and Candida tropicalis MYA-3404 : CTRG_05051
C2_08530C_A	orf19.3626	11.8558	12.6391	14.9155	30.8767	0.902621	0.0408776	Has domain(s) with predicted asparagine synthase (glutamine-hydrolyzing) activity and role in asparagine biosynthetic process, metabolic process
C2_08540C_A	orf19.3625	7.67217	8.77579	7.70166	5.63424	-0.302594	0.741532	Has domain(s) with predicted zinc ion binding activity
C2_08580W_A	orf19.3621	14.3354	12.6007	10.641	5.55854	-0.733589	0.214628	Possible pseudogene; similar to Ywp1p; ORF extended upstream from the initiating Met of orf19.3621 has a stop codon in the region corresponding to the Ywp1p signal peptide; disruption causes no apparent phenotype; no expression detected
C2_08620W_A	orf19.3615	46.4453	56.1268	45.8115	36.5494	-0.316608	0.588652	Protein of unknown function; induced in core caspofungin response; expression upregulated in an ssr1 null mutant; induced by nitric oxide independent of Yhb1p
C2_08630C_A	orf19.3613	53.2998	51.2361	48.3371	60.93	0.063861	0.937381	Ortholog(s) have RNA polymerase II C-terminal domain phosphoserine binding, chromatin binding, transcription factor activity, RNA polymerase II core promoter sequence-specific DNA binding activity
C2_08650W_A	orf19.3611	247.463	264.985	146.176	184.363	-0.632586	0.18331	Protein of unknown function; Hap43-repressed gene; repressed by nitric oxide
C2_08660C_A	orf19.3610	9.23918	8.06625	12.8152	12.8416	0.568119	0.30236	Protein of unknown function; upregulation correlates with clinical development of fluconazole resistance; regulated by Sef1, Sfu1, and Hap43
C2_08690C_A	orf19.3607	2.9355	5.02875	5.17732	3.31986	0.0934456	0.974596	Ortholog of C. dubliniensis CD36 : Cd36_22860, C. parapsilosis CDC317 : CPAR2_806540, Candida tenuis NRRL Y-1498 : CANTEDRAFT_108823 and Debaryomyces hansenii CBS767 : DEHA2B13596g
C2_08700C_A	orf19.3606	128.804	127.287	273.54	283.363	1.12077	0.00641458	Ortholog of S. cereviae Sna4 vacuolar outer membrane protein that plays a role in sensitivity to NA+; induced by Mnl1 under weak acid stress
C2_08720W_A	orf19.3604	19.6059	26.6672	29.3025	27.8424	0.304452	0.621456	Ortholog(s) have Ino80 complex localization
C2_08740W_A	orf19.3601	11.2269	14.3046	19.9202	18.5356	0.590921	0.250832	Has domain(s) with predicted ATP binding, nucleoside-triphosphatase activity, nucleotide binding activity
C2_08750W_A	orf19.3600	1.65897	1.46997	3.63468	3.82895	1.2542	0.370842	Protein of unknown function; flow model biofilm induced
C2_08770C_A	orf19.3594	54.0483	62.0229	58.4315	54.3971	-0.0408771	0.973113	Putative adhesin-like protein; predicted ORF from Assembly 19; removed from Assembly 20; subsequently reinstated in Assembly 21 based on comparative genome
C2_08830W_A	orf19.3586	100.305	99.7424	91.6726	68.9213	-0.316923	0.589048	Ortholog(s) have role in chitin localization, vesicle-mediated transport and integral component of endoplasmic reticulum membrane localization
C2_08840W_A	orf19.3585	85.5336	75.2363	85.697	136.677	0.46799	0.429107	Putative tRNA methyltransferase complex subunit; regulated by Gcn4; repressed in response to amino acid starvation (3-aminotriazole treatment); Spider biofilm induced
C2_08850C_A	orf19.225	44.8229	37.8197	105.781	118.677	1.44149	0.000848373	Predicted 2-hydroxyacid dehydrogenase; Hap43-repressed gene
C2_08860W_A	orf19.223	185.578	122.105	317.637	476.571	1.36807	0.00156339	Putative serine/threonine protein kinase; Hap43-repressed; induced by prostaglandins; possibly an essential gene, disruptants not obtained by UAU1 method; flow model biofilm induced; Spider biofilm induced
C2_08890W_A	orf19.217	0.252159	1.11716	4.544	4.78687	2.76855	0.0488796	Ortholog(s) have DNA binding activity
C2_08900W_A	orf19.216.1	1120.48	1265.48	1170.84	647.195	-0.392185	0.512025	Ortholog of C. parapsilosis CDC317 : CPAR2_806510, Candida tenuis NRRL Y-1498 : CANTEDRAFT_109089, Debaryomyces hansenii CBS767 : DEHA2B13508g and Pichia stipitis Pignal : PICST_59544
C2_08910C_A	orf19.216	102.012	46.2271	84.3332	102.315	0.332394	0.577834	Protein with a metallo-dependent phosphatase domain; ketoconazole-induced; upregulation correlates with clinical development of fluconazole resistance
C2_08920W_A	orf19.215	271.372	141.377	329.273	353.721	0.726608	0.151472	Component of a complex containing the Tor2p kinase; possible a role in regulation of cell growth; Spider biofilm induced
C2_08930W_A	orf19.213	59.7581	54.1123	73.6919	69.459	0.330144	0.55984	Ortholog(s) have role in proteasome-mediated ubiquitin-dependent protein catabolic process and nuclear chromatin, nuclear periphery, proteasome regulatory particle, lid subcomplex, proteasome storage granule localization
C2_08950W_A	orf19.211	163.302	146.549	196.246	82.6942	-0.151618	0.880263	Predicted homeodomain-like transcription factor; also has a metal-binding Ada DNA repair protein domain; Spider biofilm induced
C2_08960C_A	orf19.210	30.1039	27.119	26.3162	14.1046	-0.501494	0.60684	Ortholog(s) have role in division septum assembly, protein localization to bud neck and cytoplasm, division septum localization
C2_08990C_A	orf19.206	13.1377	17.0413	21.594	13.4836	0.217007	0.770403	Putative adhesin-like protein
C2_09000C_A	orf19.204	32.9789	28.4529	45.6978	43.7002	0.541255	0.365486	Ortholog of C. dubliniensis CD36 : Cd36_23180, Candida tropicalis MYA-3404 : CTRG_01968 and Candida albicans WO-1 : CAWG_05983
C2_09030W_A	orf19.201	12.9847	22.6622	12.3708	5.08565	-1.03002	0.207918	Protein of unknown function; unmerged from orf19.202 in a revision of Assembly 21
C2_09040W_A	orf19.200	114.91	114.547	88.1159	91.3121	-0.354818	0.521044	Putative nuclear RNA-binding protein; Spider biofilm repressed
C2_09050C_A	orf19.199	20.5536	21.3521	25.8154	30.9167	0.43702	0.405715	Protein of unknown function; hyphal-induced expression; upregulated in a cyr1 null mutant
C2_09070C_A	orf19.4066	248.081	199.457	135.607	238.61	-0.258138	0.70492	Putative glycerol-3-phosphate acyltransferase; Hog1-repressed
C2_09100C_A	orf19.4068	20.3178	18.3542	14.7556	13.487	-0.453418	0.374382	Protein of unknown function; flow model biofilm induced
C2_09110C_A	orf19.4069	6.33215	6.01156	12.1391	8.03814	0.708955	0.566848	Protein of unknown function; repressed by alpha pheromone in SpiderM medium
C2_09120C_A	orf19.4070	2.99727	3.98373	7.90069	7.41502	1.13351	0.21602	Ortholog of C. dubliniensis CD36 : Cd36_23270
C2_09160W_A	orf19.4078	27.9734	26.594	23.2382	46.8421	0.360972	0.536646	Ortholog(s) have role in U1 snRNA 3'-end processing, U4 snRNA 3'-end processing and U5 snRNA 3'-end processing, more
C2_09180W_A	orf19.4080	8.08674	7.77274	6.30622	9.63276	0.00721358	0.995023	Putative ribonuclease H2 subunit; required for RNase H2 activity; repressed in Spider biofilms by Bcr1, Tec1, Brg1, Rob1
C2_09210W_A	orf19.4081	0.397451	0	0	0.64213	0.69209	1	Dubious open reading frame
C2_09240C_A	orf19.4085	26.9469	30.3239	18.8038	42.0123	0.0866533	0.980042	Protein of unknown function; transcript detected on high-resolution tiling arrays
C2_09250W_A	orf19.4086	41.1906	42.5811	26.5241	27.7285	-0.62677	0.261876	Has domain(s) with predicted protein tyrosine phosphatase activity
C2_09280C_A	orf19.4090	30.3625	37.665	36.4184	22.8432	-0.199022	0.775611	Predicted membrane transporter, member of the fucose:proton symporter (FHS) family, major facilitator superfamily (MFS)
C2_09290W_A	orf19.4090.1	109.802	83.1045	42.0994	51.7412	-1.03962	0.211597	Ortholog(s) have role in vacuolar proton-transporting V-type ATPase complex assembly and endoplasmic reticulum membrane localization
C2_09310C_A	orf19.4092	50.9915	55.4997	39.7173	55.1382	-0.166931	0.837892	Trimeric GatFAB AmidoTransferase(AdT) complex subunit; involved in the formation of Q-tRNAQ; repressed by fluphenazine treatment or in an azole-resistant strain that overexpresses CDR1; Spider biofilm induced
C2_09330C_A	orf19.4094	1.22963	1.81591	0.314303	0.662205	-1.64099	0.591949	Ortholog of C. dubliniensis CD36 : Cd36_23450, C. parapsilosis CDC317 : CPAR2_407010, Candida tenuis NRRL Y-1498 : cten_CGOB_00249 and Debaryomyces hansenii CBS767 : DEHA2B01980g
C2_09340W_A	orf19.4095	5.21515	2.52056	0	0.382987	-4.33617	0.352986	Ortholog of C. parapsilosis CDC317 : CPAR2_407020, C. dubliniensis CD36 : Cd36_23460, Debaryomyces hansenii CBS767 : DEHA2B02002g and Pichia stipitis Pignal : PICST_31649
C2_09360W_A	orf19.4097	19.7166	21.4852	21.3043	25.3791	0.180204	0.796956	Ortholog of C. dubliniensis CD36 : Cd36_23480, C. parapsilosis CDC317 : CPAR2_407050, Candida tenuis NRRL Y-1498 : CANTEDRAFT_116822 and Debaryomyces hansenii CBS767 : DEHA2B02046g
C2_09410W_A	orf19.1599	5.38139	3.40595	1.76854	3.1051	-0.850427	0.711894	Ortholog of Candida albicans WO-1 : CAWG_06018
C2_09420W_A	orf19.1600	55.3864	66.069	57.318	44.0984	-0.260137	0.681505	Ortholog of C. dubliniensis CD36 : Cd36_23530, C. parapsilosis CDC317 : CPAR2_406140, Candida tenuis NRRL Y-1498 : CANTEDRAFT_116829 and Debaryomyces hansenii CBS767 : DEHA2B01826g
C2_09460C_A	orf19.1604	86.1752	55.076	75.8953	118.515	0.46084	0.42591	Predicted Gal4-like DNA-binding transcription factor; Spider biofilm induced
C2_09480W_A	orf19.1406	11.0319	11.6195	20.4305	16.31	0.697777	0.30626	Ortholog(s) have DNA-directed DNA polymerase activity, role in error-free translesion synthesis, error-prone translesion synthesis and mitochondrion, nuclear chromatin, zeta DNA polymerase complex localization
C2_09500W_A	orf19.1404	206.709	183.596	151.572	269.379	0.109051	0.89727	Predicted tRNA dihydrouridine synthase; Spider biofilm induced
C2_09510C_A	orf19.1403	244.265	173.924	138.63	244.196	-0.127465	0.88186	Ortholog(s) have ATP:ADP antiporter activity, calcium ion binding activity and role in ADP transport, ATP transport, mitochondrial transport
C2_09560C_A	orf19.1400	15.8493	19.0154	16.2344	15.5601	-0.132988	0.860533	Ortholog of C. dubliniensis CD36 : Cd36_23640, C. parapsilosis CDC317 : CPAR2_406130, Candida tenuis NRRL Y-1498 : CANTEDRAFT_116273 and Debaryomyces hansenii CBS767 : DEHA2B11176g
C2_09570C_A	orf19.1397	111.505	123.967	64.441	103.426	-0.488233	0.33334	Has domain(s) with predicted heme binding activity
C2_09590C_A	orf19.1395	9.29004	10.0324	13.6911	10.4361	0.320384	0.696834	Ortholog(s) have copper ion transmembrane transporter activity, inorganic phosphate transmembrane transporter activity and role in cellular copper ion homeostasis, copper ion transmembrane transport, phosphate ion transmembrane transport
C2_09600C_A	orf19.1394	57.6303	49.6563	30.4775	38.5278	-0.636692	0.276968	Putative protein of unknown function; mutant is viable; protein level decreases in stationary phase cultures; Spider biofilm induced
C2_09610W_A	orf19.1393	82.0946	63.6495	60.9345	99.2628	0.136412	0.860247	Ortholog(s) have NAD transmembrane transporter activity, pyruvate secondary active transmembrane transporter activity, role in NAD transmembrane transport, mitochondrial pyruvate transmembrane transport and mitochondrion localization
C2_09620W_A	orf19.1392	36.6922	51.6554	34.7542	26.0835	-0.538224	0.271521	Ortholog(s) have protein disulfide isomerase activity, protein-disulfide reductase (glutathione) activity, unfolded protein binding activity and role in protein retention in ER lumen, ubiquitin-dependent ERAD pathway
C2_09630C_A	orf19.1391	8.10088	10.2543	15.382	6.23236	0.235801	0.938913	Protein with similarity to trimeric LpxA-like enzymes; Hap43-repressed gene
C2_09650W_A	orf19.1389	1352.24	1324.18	735.732	614.126	-0.987497	0.112155	Ortholog(s) have poly(A) binding activity, role in mRNA metabolic process and cytoplasm localization
C2_09660W_A	orf19.1388	461.163	330.364	316.07	626.78	0.252391	0.720034	Putative 66S pre-ribosomal particle component; Hap43-induced; F-12/CO2 early biofilm induced
C2_09670C_A	orf19.1387	79.1972	87.2196	98.2051	90.0149	0.177619	0.790762	Ortholog(s) have 4 iron, 4 sulfur cluster binding, ATPase activity, role in iron-sulfur cluster assembly, tRNA wobble uridine modification and Nbp35-Cfd1 ATPase complex localization
C2_09680W_A	orf19.1386	165.462	126.028	137.424	173.493	0.0930792	0.906501	Ortholog(s) have SNAP receptor activity and role in ER to Golgi vesicle-mediated transport, retrograde vesicle-mediated transport, Golgi to ER, vesicle fusion
C2_09690C_A	orf19.1383	11.19	12.5592	22.2579	19.284	0.806689	0.084025	Protein of unknown function; induced by alpha pheromone in SpiderM medium
C2_09710C_A	orf19.1381	92.9392	90.7798	75.371	51.3055	-0.536352	0.286086	Ortholog of S. cerevisiae/S. pombe Lsb5; predicted role in actin cortical patch localization, actin filament organization, endocytosis; flow model biofilm induced; Spider biofilm repressed
C2_09760W_A	orf19.1374	65.5742	56.1199	46.8499	50.9044	-0.316027	0.615905	Ortholog of C. dubliniensis CD36 : Cd36_23840, Candida tenuis NRRL Y-1498 : CANTEDRAFT_104074, Debaryomyces hansenii CBS767 : DEHA2B13310g and Pichia stipitis Pignal : PICST_58235
C2_09780C_A	orf19.1372	39.7983	46.8166	23.8534	19.2158	-1.00796	0.0507201	Protein of unknown function; transcript regulated by Mig1 and Tup1
C2_09790W_A	orf19.1371	21.1046	20.6101	13.9798	16.2505	-0.464561	0.39336	Ortholog of C. dubliniensis CD36 : Cd36_23880, C. parapsilosis CDC317 : CPAR2_806590, Candida tenuis NRRL Y-1498 : CANTEDRAFT_92769 and Debaryomyces hansenii CBS767 : DEHA2B13376g
C2_09800C_A	orf19.1370	514.445	417.337	356.782	286.294	-0.535004	0.316829	Protein of unknown function; expression regulated by white-opaque switch; repressed by alpha pheromone in SpiderM medium
C2_09810C_A	orf19.1369	24.9735	25.2626	17.8353	11.8619	-0.758399	0.122635	Protein with predicted peptidase domains; Hap43-repressed gene
C2_09820W_A	orf19.1368	19.0117	19.234	48.9866	22.1836	0.895974	0.0428786	Protein of unknown function; flow model biofilm induced; Spider biofilm induced
C2_09830C_A	orf19.1367.1	545.288	407.186	335.524	394.309	-0.384113	0.508209	Ortholog of C. parapsilosis CDC317 : CPAR2_407330, Candida tenuis NRRL Y-1498 : CANTEDRAFT_114646, Debaryomyces hansenii CBS767 : DEHA2B05654g and Pichia stipitis Pignal : PICST_44644
C2_09850C_A	orf19.1366	0.447002	0.19804	1.62817	1.17355	2.11885	0.241559	Has domain(s) with predicted oxidoreductase activity, acting on paired donors, with incorporation or reduction of molecular oxygen, 2-oxoglutarate as one donor, and incorporation of one atom each of oxygen into both donors activity
C2_09860C_A	orf19.1365	10.7522	7.54248	7.83284	7.31053	-0.272741	0.730334	Putative monooxygenase; mutation confers hypersensitivity to toxic ergosterol analog; constitutive expression independent of MTL or white-opaque status
C2_09870W_A	orf19.1364	82.0708	80.7456	69.8784	104.362	0.0978304	0.902944	Ortholog of S. pombe Stm1 G-protein coupled receptor; PQ-loop domains; constitutive expression independent of MTL or white-opaque status; Hap43-repressed
C2_09880C_A	orf19.1363	699.223	519.29	1400.55	1924.29	1.44816	0.00338059	Putative protein of unknown function; Plc1-regulated; transcript induced by Mnl1 under weak acid stress; flow model, rat catheter, Spider biofilm induced
C2_09910C_A	orf19.1360.1	214.807	298.364	244.853	314.218	0.123591	0.916299	Putative adhesin-like protein
C2_09920W_A	orf19.1360	20.7096	28.6266	22.2329	27.4363	0.00970636	0.993285	Ortholog(s) have role in mitochondrial genome maintenance
C2_09930W_A	orf19.1359	14.1788	18.9129	23.8497	20.3828	0.41864	0.431711	Ortholog(s) have protein-containing complex binding activity, role in sporulation resulting in formation of a cellular spore, ubiquitin-dependent ERAD pathway and extrinsic component of membrane, nucleus localization
C2_09960W_A	orf19.1356	17.7606	21.1999	22.3987	9.48577	-0.289159	0.683839	Ortholog(s) have thiosulfate sulfurtransferase activity, role in tRNA wobble position uridine thiolation and mitochondrion localization
C2_09970C_A	orf19.1355	83.1704	95.605	83.3843	89.3164	-0.0498739	0.95264	Putative protein of unknown function; stationary phase enriched protein
C2_09980W_A	orf19.1785	451.165	372.882	635.574	246.214	0.0977046	0.916299	Protein with a PI31 proteasome regulator domain; Hap43-repressed; flow model biofilm induced
C2_10000C_A	orf19.1782.1	3.13605	2.27355	1.96756	1.15151	-0.794402	0.663486	Ortholog of C. parapsilosis CDC317 : CPAR2_407200.1, C. dubliniensis CD36 : Cd36_24070, Pichia stipitis Pignal : PICST_31669 and Spathaspora passalidarum NRRL Y-27907 : spas_CGOB_00103
C2_10010C_A	orf19.1782	79.1392	64.8541	42.2697	36.0296	-0.878931	0.0500389	Membrane-localized protein of unknown function
C2_10020C_A	orf19.1780	0.114018	0.707204	1.9235	1.65789	2.12468	0.205455	Has domain(s) with predicted catalytic activity
C2_10040W_A	orf19.1778	0	0	3.19196	3.36257	inf	0.0433538	Dubious open reading frame
C2_10050W_A	orf19.1777	40.4089	51.3777	47.2361	42.3969	-0.0342515	0.970377	Ortholog(s) have endopeptidase activity, thiol-dependent ubiquitin-specific protease activity
C2_10060C_A	orf19.1776	5.09079	2.32376	7.80748	4.36163	0.714793	0.438293	Putative pantetheine-phosphate adenylyltransferase (PPAT); which catalyzes 4th step in coenzyme A biosynthesis from pantothenate; rat catheter biofilm repressed
C2_10070W_A	orf19.1774	2.63921	2.78398	3.0839	2.43655	0.0256441	0.988821	Predicted dehydrogenase; transcript upregulated in an RHE model of oral candidiasis; virulence-group-correlated expression; Spider biofilm repressed
C2_10090C_A	orf19.1772	36.9314	35.6127	49.0418	90.4363	0.943109	0.0368859	Ortholog of S. cerevisiae : MRX1, C. glabrata CBS138 : CAGL0J03278g, C. dubliniensis CD36 : Cd36_24130, C. parapsilosis CDC317 : CPAR2_407430 and Candida tenuis NRRL Y-1498 : cten_CGOB_00234
C2_10120W_A	orf19.1769	32.7831	26.7597	33.8232	42.8535	0.364862	0.550551	Ortholog(s) have G-protein beta/gamma-subunit complex binding, actin binding activity, role in positive regulation of transcription from RNA polymerase II promoter by pheromones, protein folding and cytoplasm localization
C2_10130W_A	orf19.1768	2.45582	1.35557	2.9637	3.74002	0.814644	0.212956	Ortholog of C. parapsilosis CDC317 : CPAR2_407480, C. dubliniensis CD36 : Cd36_24170, Candida orthopsilosis Co 90-125 : CORT_0C06830 and Spathaspora passalidarum NRRL Y-27907 : SPAPADRAFT_65786
C2_10140W_A	orf19.1767	14.6244	16.1501	15.1366	35.9068	0.729991	0.124902	Ortholog(s) have protein-containing complex scaffold activity, thiol-dependent ubiquitin-specific protease activity and role in RNA splicing, histone H3-K4 methylation, histone H3-K79 methylation, histone deubiquitination
C2_10150W_A	orf19.1766	18.208	25.0378	20.0941	12.6077	-0.403191	0.517424	Secreted protein; fluconazole-induced
C2_10160W_A	orf19.1765	7.84483	8.73857	15.4687	20.641	1.12265	0.0318081	Secreted protein; fluconazole-induced
C2_10170C_A	orf19.1764	151.501	117.543	186.329	238.856	0.660249	0.169923	Protein of unknown function; rat catheter and Spider biofilm induced
C2_10200W_A	orf19.1761	34.8068	43.5805	30.7524	24.1442	-0.513904	0.44953	Predicted olichyl-diphosphooligosaccharide-protein glycotransferase; role in protein N-linked glycosylation; Spider biofilm repressed
C2_10230W_A	orf19.1757	14.3128	7.18378	26.006	42.2316	1.66646	0.0256371	Putative C2H2 transcription factor; expression upregulated in clinical isolates from HIV+ patients with oral candidiasis; Spider biofilm induced
C2_10300C_A	orf19.1748	3.20312	3.9735	6.14058	5.12328	0.650324	0.331054	Protein of unknown function; shows colony morphology-related gene regulation by Ssn6
C2_10320C_A	orf19.1746	2.41905	1.77069	0.967821	0.764663	-1.27402	0.27113	Protein similar to S. cerevisiae meiosis-specific, spore-wall-localized protein Ssp2p, which is required for wild-type outer spore wall formation in S. cerevisiae; possibly an essential gene (UAU1 method); Hap43p-repressed
C2_10330C_A	orf19.1745	11.3582	10.7831	29.2398	20.6443	1.17184	0.115001	Protein of unknown function; Hap43-repressed gene
C2_10460C_A	orf19.5321	20.6626	21.5933	26.2673	23.0686	0.223485	0.733235	Ortholog(s) have methylenetetrahydrofolate reductase (NAD(P)H) activity and role in methionine biosynthetic process, one-carbon metabolic process
C2_10470C_A	orf19.5322	64.6456	74.8045	69.1396	50.5036	-0.22101	0.736518	Ortholog(s) have phosphatidylinositol-3-phosphate binding activity and role in autophagy of peroxisome, protein localization by the Cvt pathway, protein localization to phagophore assembly site, vesicle organization
C2_10540W_A	orf19.5326	288.62	233.824	469.97	611.036	1.04903	0.0225887	Putative transcription factor with zinc finger DNA-binding motif; possible ortholog of S. cerevisiae Mig2p
C2_10600W_A	orf19.5339	49.9182	47.9174	97.6103	69.2237	0.769981	0.201856	Ortholog of S. cerevisiae Spg5; required for proteasome assembly during quiescence; transcript detected on high-resolution tiling arrays; Spider biofilm induced
C2_10630W_A	orf19.5342	2.58264e-06	1.88575e-20	3.84365e-06	1.05176e-05	2.47526	1	Ortholog(s) have cytosol, extracellular region localization
C2_10650W_A	orf19.5342.2	61.9966	73.2452	79.2342	83.4692	0.266704	0.876188	Protein of unknown function; protein newly produced during adaptation to the serum
C2_10670W_A	orf19.5345	236.604	238.098	185.98	123.371	-0.617777	0.213755	Putative ubiquitin-like polyubiquitin-binding protein; induced by nitric oxide independent of Yhb1; Spider biofilm repressed
C2_10680W_A	orf19.5346	45.5413	44.5026	40.937	37.0724	-0.206978	0.754018	Ortholog(s) have role in transcription by RNA polymerase II and transcription factor TFIID complex localization
C2_10700C_A	orf19.5350	69.8572	56.4281	67.0956	65.5516	0.0709075	0.978479	Ortholog(s) have role in positive regulation of DNA-templated transcription, elongation, positive regulation of transcription by RNA polymerase I, positive regulation of translational fidelity, protein phosphorylation
C2_10720C_A	orf19.5352	57.6332	58.5945	50.8087	43.9175	-0.295119	0.624544	Protein with a predicted magnesium transporter domain; mutants are viable
C2_10730W_A	orf19.5353	20.0516	18.8523	14.7892	20.6492	-0.134601	0.843156	Ortholog of C. parapsilosis CDC317 : CPAR2_407790, C. dubliniensis CD36 : Cd36_24630, Candida orthopsilosis Co 90-125 : CORT_0C07130 and Spathaspora passalidarum NRRL Y-27907 : SPAPADRAFT_149801
C2_10740C_A	orf19.5356	67.2238	52.5869	75.3516	128.556	0.767159	0.128279	Protein with a predicted role in cell wall integrity; repressed in core stress response
C2_10760C_A	orf19.5358	48.2019	43.0474	54.4965	73.9362	0.493127	0.327065	Phosphorylated protein of unknown function
C2_10790C_A	orf19.5363	103.014	92.196	80.3831	87.3976	-0.218451	0.742869	Component of UDP-GlcNAc transferase; required for the 2nd step of dolichyl-linked oligosaccharide synthesis; Spider biofilm induced
C2_10810W_A	orf19.5364	82.0105	77.5419	119.768	147.714	0.74541	0.0860437	Putative pre-mRNA splicing factor; intron in 5'-UTR; possibly an essential gene, disruptants not obtained by UAU1 method
C2_10820C_A	orf19.5365	25.9812	26.9243	75.5491	94.1536	1.68152	0.000848373	S. cerevisiae ortholog YMR259C interacts with Trm7 for 2'-O-methylation of C32 of substrate tRNAs; downregulated by fluphenazine treatment or in an azole-resistant strain that overexpresses CDR1 and CDR2
C2_10830W_A	orf19.5365.1	65.1573	164.182	143.647	251.66	0.785488	0.235111	Ortholog of C. parapsilosis CDC317 : CPAR2_407710, C. dubliniensis CD36 : Cd36_24540, Candida tenuis NRRL Y-1498 : CANTEDRAFT_116924 and Lodderomyces elongisporus NRLL YB-4239 : LELG_02895
C2_10850C_A	orf19.5368	66.2838	65.7034	90.746	87.8891	0.436618	0.494229	Ortholog of Vms1; component of a Cdc48-complex involved in protein quality control in S. cerevisiae; Spider biofilm repressed
C2_10860C_A	orf19.5369	165.51	164.913	131.842	107.436	-0.465624	0.384822	Uroporphyrinogen decarboxylase; catalyzes the 5th step in the heme biosynthetic pathway; flow model and Spider biofilm repressed
C2_10870W_A	orf19.5370	13.8045	10.6081	20.0471	13.1251	0.442347	0.492492	Ortholog(s) have fungal-type vacuole membrane localization
C3_00010C_A	orf19.5474	57.129	57.1131	56.918	38.0638	-0.266372	0.660544	Protein of unknown function; induced by Mnl1 under weak acid stress; transcript detected on high-resolution tiling arrays; Spider biofilm repressed
C3_00020W_A	orf19.5475	0.000565128	0.0490035	0.00105909	0.00181292	-4.10929	1	Sef1p-, Sfu1p-, and Hap43p-regulated gene
C3_00030C_A	orf19.5469	36.9236	34.131	33.8221	22.7912	-0.327788	0.582399	Protein with a predicted DEAD-like DNA/RNA helicase domain; shows colony morphology-related gene regulation by Ssn6; overlaps orf19.5472; Spider biofilm repressed
C3_00040W_A	orf19.5472	5.85494	1.09086	0.000791061	0.904842	-2.93914	0.777495	Protein of unknown function
C3_00050C_A	orf19.5468	26.6671	19.8485	17.9951	19.8186	-0.298804	0.838205	Predicted ORF from Assembly 19; removed from Assembly 20; restored based on transcription data; almost identical to orf19.6113, orf19.4055, orf19.5370
C3_00100W_A	orf19.5465	128.038	110.494	207.518	242.108	0.914545	0.414175	Ortholog(s) have first spliceosomal transesterification activity, role in generation of catalytic spliceosome for first transesterification step and U2-type catalytic step 1 spliceosome localization
C3_00120W_A	orf19.5464	13.6203	7.41519	8.60373	1.64743e-05	-1.28979	0.856279	Protein of unknown function
C3_00130C_A	orf19.5459	128.781	117.353	158.205	124.661	0.200674	0.836708	mRNA polyadenylation regulating protein; Hap43-repressed; transcript is upregulated in RHE model of oral candidiasis and in clinical isolates from HIV+ patients with oral candidiasis; Spider biofilm repressed
C3_00140W_A	orf19.5462	117.761	96.8923	177.016	118.385	0.460666	0.80839	Protein of unknown function
C3_00150W_A	orf19.5461	171.718	136.33	190.9	134.149	0.077506	0.971907	Ortholog of Candida albicans WO-1 : CAWG_02350
C3_00160C_A	orf19.5457	68.1177	63.503	74.5259	60.7613	0.039639	0.966071	Ortholog(s) have lipid droplet localization
C3_00170C_A	orf19.5455	1455.28	1488.15	1320.38	860.123	-0.432839	0.440937	Ortholog(s) have GTPase regulator activity, mRNA binding activity
C3_00190W_A	orf19.5451	5.71295	1.62225	15.3802	16.9323	2.13919	0.599053	Ortholog of Candida guilliermondii ATCC 6260 : PGUG_05321, Candida lusitaniae ATCC 42720 : CLUG_00887 and Candida albicans WO-1 : CAWG_02354
C3_00210C_A	orf19.5449	24.2109	30.7165	15.8229	11.1124	-1.02803	0.0881894	Predicted integral membrane protein; Spider biofilm induced
C3_00230C_A	orf19.5446	25.9046	23.3225	33.4904	18.7063	0.0845082	0.980018	Putative protein of unknown function; transcript is upregulated in clinical isolates from HIV+ patients with oral candidiasis; regulated by Ssn6
C3_00270C_A	orf19.5442	29.0224	36.0673	35.8321	39.3692	0.20833	0.760288	Ortholog of C. dubliniensis CD36 : Cd36_80240, C. parapsilosis CDC317 : CPAR2_504040, Candida tenuis NRRL Y-1498 : CANTEDRAFT_130872 and Debaryomyces hansenii CBS767 : DEHA2C06006g
C3_00300W_A	orf19.5439	23.9544	22.1079	29.6108	28.512	0.335518	0.550383	Ortholog of C. parapsilosis CDC317 : CPAR2_504010, C. dubliniensis CD36 : Cd36_80270, Lodderomyces elongisporus NRLL YB-4239 : LELG_02294 and Pichia stipitis Pignal : PICST_29581
C3_00310C_A	orf19.5438	56.4556	50.5861	87.0695	81.4749	0.654955	0.24948	Putative ubiquitin-protein ligase; role in protein sumoylation, protein ubiquitination; Spider biofilm induced
C3_00340W_A	orf19.5433	293.108	250.689	143.632	221.582	-0.574329	0.244576	Ortholog(s) have protein binding involved in protein folding activity, role in mitochondrial respiratory chain complex III assembly and mitochondrial matrix localization
C3_00360W_A	orf19.5431	185.933	142.135	444.794	696.137	1.79814	0.000848373	Protein of unknown function; Hap43-repressed; Spider biofilm induced
C3_00380C_A	orf19.5429	10.2864	10.8343	20.0918	19.5456	0.908201	0.0431284	Ortholog(s) have DNA replication origin binding, ubiquitin-protein transferase activity
C3_00390W_A	orf19.5428	13.3715	11.3331	15.1575	18.0028	0.424677	0.576604	Putative Golgi membrane protein with a predicted role in manganese homeostasis; Hap43p-repressed gene; clade-associated gene expression
C3_00400C_A	orf19.5426	32.0198	36.4332	41.105	36.6374	0.183588	0.792702	Putative patatin-like phospholipase; macrophage-regulated gene; fungal-specific (no human or murine homolog)
C3_00410C_A	orf19.5424	14.1844	21.29	31.7139	46.984	1.14955	0.669115	Ortholog of Candida albicans WO-1 : CAWG_02376
C3_00420W_A	orf19.5425	35.9929	37.8255	44.5624	67.992	0.608568	0.23285	Ortholog(s) have 3'-tRNA processing endoribonuclease activity, role in mitochondrial tRNA 3'-end processing, nuclear tRNA 3'-trailer cleavage, endonucleolytic and mitochondrion, nucleus localization
C3_00440W_A	orf19.5422	8.31186	9.32895	18.2714	7.16204	0.527809	0.567365	Ortholog of C. dubliniensis CD36 : Cd36_80400, Candida tropicalis MYA-3404 : CTRG_06188 and Candida albicans WO-1 : CAWG_02379
C3_00450C_A	orf19.5420	191.849	173.815	145.511	168.597	-0.219259	0.746759	Ortholog(s) have structural constituent of ribosome activity, role in mitochondrial translation and mitochondrial large ribosomal subunit localization
C3_00470W_A	orf19.5418	39.6234	46.0758	37.594	36.1158	-0.217425	0.733196	Ortholog(s) have role in ER to Golgi vesicle-mediated transport
C3_00500C_A	orf19.5413	28.3419	27.4946	38.3143	37.9937	0.450625	0.398151	Ortholog(s) have role in mRNA splicing, via spliceosome and Prp19 complex, spliceosomal complex localization
C3_00510W_A	orf19.5412	12.4434	15.2938	28.7282	26.6969	0.998719	0.0368859	Ortholog of S. cerevisiae : ECM9, C. glabrata CBS138 : CAGL0L02255g, C. dubliniensis CD36 : Cd36_80470, C. parapsilosis CDC317 : CPAR2_503390 and Candida tenuis NRRL Y-1498 : CANTEDRAFT_133107
C3_00520W_A	orf19.5411	48.0184	50.7832	77.6819	56.0575	0.436818	0.426532	Ortholog(s) have NEDD8 transferase activity and role in protein neddylation
C3_00530C_A	orf19.5410	15.9595	21.1289	23.1085	17.7458	0.139521	0.857155	Ortholog(s) have microtubule plus-end binding activity
C3_00570C_A	orf19.5406	42.8067	48.4611	42.4228	61.258	0.18397	0.792384	Predicted plasma membrane associated protein phosphatase; required for normal filamentous growth; mRNA binds She3 and is localized to hyphal tips
C3_00610W_A	orf19.5397	18.4339	18.3259	15.6871	13.6199	-0.326883	0.685652	Putative conserved oligomeric Golgi complex subunit; decreased transcription is observed upon fluphenazine treatment
C3_00620C_A	orf19.5394.1	132.447	105.553	152.646	144.978	0.322526	0.610417	Ortholog(s) have role in mitochondrial respiratory chain complex IV assembly and integral component of mitochondrial inner membrane, mitochondrial intermembrane space localization
C3_00630W_A	orf19.5395	16.9051	16.4116	20.7103	22.6061	0.378667	0.471346	Ortholog(s) have role in early endosome to late endosome transport, regulation of protein complex assembly, vacuolar acidification and RAVE complex, extrinsic component of membrane localization
C3_00640W_A	orf19.5393	178.345	154.844	86.3223	178.524	-0.331189	0.60389	Putative cysteine sulfinate decarboxylase; transcript positively regulated by Tbf1; Spider biofilm induced
C3_00660W_A	orf19.5391	14.2036	15.4596	16.6517	29.0707	0.624226	0.195475	Predicted RNA splicing and ER to Golgi transport protein; Hap43-induced gene
C3_00680C_A	orf19.5390	5.55451	8.58832	6.71815	14.7108	0.59949	0.892203	Ortholog of Candida albicans WO-1 : CAWG_02403
C3_00730W_A	orf19.5381	23.018	28.7683	38.7138	38.7417	0.580796	0.225629	Ortholog(s) have mRNA binding activity
C3_00790W_A	orf19.5376	7.71874	7.68262	13.8649	12.0862	0.752736	0.115001	Ortholog of S. cerevisiae Elm1; a serine/threonine protein kinase that regulates cellular morphogenesis, septin behavior, and cytokinesis in S. cerevisiae; possibly an essential gene, disruptants not obtained by UAU1 method
C3_00830C_A	orf19.6155	38.0471	31.5313	25.5714	29.1529	-0.346457	0.5328	Ortholog(s) have DNA ligase (ATP) activity
C3_00840C_A	orf19.6156	67.4533	54.4324	52.0328	65.8415	-0.0482806	0.959423	Ortholog of S. cerevisiae : AIM11, C. glabrata CBS138 : CAGL0I04928g, C. dubliniensis CD36 : Cd36_80770, C. parapsilosis CDC317 : CPAR2_102260 and Candida tenuis NRRL Y-1498 : CANTEDRAFT_114262
C3_00850C_A	orf19.6160	413.977	425.075	235.015	167.271	-1.06054	0.0209768	Ortholog(s) have role in eisosome assembly and eisosome, membrane raft localization
C3_00870W_A	orf19.6164	7.57511	5.03411	1.4522	0	-3.11817	0.228744	Ortholog of Candida albicans WO-1 : CAWG_02424
C3_00890C_A	orf19.6166	18.8489	18.4201	22.8658	23.5004	0.3151	0.58618	Ortholog of C. dubliniensis CD36 : Cd36_80810, C. parapsilosis CDC317 : CPAR2_101800, Candida tenuis NRRL Y-1498 : CANTEDRAFT_103482 and Debaryomyces hansenii CBS767 : DEHA2F17864g
C3_00910W_A	orf19.6168	5.72126	6.67482	9.65184	8.78122	0.572412	0.296258	Ortholog of C. dubliniensis CD36 : Cd36_80830, Debaryomyces hansenii CBS767 : DEHA2F17930g, Candida tropicalis MYA-3404 : CTRG_04030 and Candida lusitaniae ATCC 42720 : CLUG_04224
C3_00940W_A	orf19.2498	43.2366	41.3448	107.341	105.295	1.32998	0.000848373	Predicted ubiquitin-protein ligase; Hap43-repressed gene; oxidative stress-induced via Cap1; flow model biofilm induced
C3_00950C_A	orf19.2499	18.323	18.5064	20.0441	23.9102	0.255148	0.71623	Putative peptidyl-prolyl cis-trans isomerase
C3_00960W_A	orf19.2500	13.8244	12.0268	15.034	10.6599	-0.00880575	0.99224	Has domain(s) with predicted transferase activity and role in biosynthetic process
C3_00990C_A	orf19.2503	0.336207	0.198604	0.515624	1.08637	1.58276	1	Ortholog of S. cerevisiae : YGL138C, C. glabrata CBS138 : CAGL0H08910g, C. dubliniensis CD36 : Cd36_80910, C. parapsilosis CDC317 : CPAR2_102230 and Candida tenuis NRRL Y-1498 : CANTEDRAFT_109984
C3_01010W_A	orf19.2505	1.09389	0	0	0	#N/A	1	Ortholog of Candida albicans WO-1 : CAWG_02437
C3_01020W_A	orf19.2506	23.0813	25.5155	33.9189	22.7821	0.222514	0.730373	Protein of unknown function; opaque-specific transcript; induced during chlamydospore formation in both C. albicans and C. dubliniensis; Hog1-repressed; Spider biofilm induced
C3_01050C_A	orf19.2509	0	0	0	2.32149e-06	inf	1	Ortholog of C. parapsilosis CDC317 : CPAR2_401850, C. dubliniensis CD36 : Cd36_80970, Lodderomyces elongisporus NRLL YB-4239 : LELG_04407 and Candida orthopsilosis Co 90-125 : CORT_0E01890
C3_01060W_A	orf19.2509.1	199.679	151.656	131.245	120.977	-0.478152	0.571986	Ortholog of C. dubliniensis CD36 : Cd36_29340, Spathaspora passalidarum NRRL Y-27907 : spas_CGOB_00040 and Candida albicans WO-1 : CAWG_00248
C3_01070C_A	orf19.2510	5.63116	7.57826	6.1038	6.53265	-0.0639769	0.945729	Ortholog(s) have role in protein folding, tubulin complex assembly
C3_01090W_A	orf19.2511.2	293.652	307.735	264.153	355.823	0.0439184	0.966217	Ortholog of C. parapsilosis CDC317 : CPAR2_103040, Candida tenuis NRRL Y-1498 : CANTEDRAFT_116324, Debaryomyces hansenii CBS767 : DEHA2G01980g and Pichia stipitis Pignal : PICST_45936
C3_01100W_A	orf19.2512	17.0827	17.8888	3.57258	6.27256	-1.8287	0.708539	Ortholog of C. dubliniensis CD36 : Cd36_81000, C. parapsilosis CDC317 : CPAR2_103050, Candida tenuis NRRL Y-1498 : CANTEDRAFT_116326 and Debaryomyces hansenii CBS767 : DEHA2G01958g
C3_01110C_A	orf19.2513	4.72737	4.72585	2.55614	9.15538	0.30905	0.958639	Has domain(s) with predicted role in Group I intron splicing and ribonucleoprotein complex localization
C3_01120W_A	orf19.2514	20.0812	15.478	18.352	29.8882	0.440012	0.820106	Predicted methyltransferase; rat catheter biofilm induced
C3_01130C_A	orf19.2515	50.7919	61.8561	119.134	83.3828	0.846223	0.411227	ZZ-type zinc finger protein; rat catheter and Spider biofilm induced
C3_01140W_A	orf19.2516	50.1539	78.2802	33.8724	55.7544	-0.519026	0.845472	Has domain(s) with predicted role in cell redox homeostasis
C3_01150C_A	orf19.158	129.618	75.0707	121.933	295.567	1.02835	0.448576	Ortholog of S. cerevisiae Apd1; required for normal localization of actin patches and normal tolerance of sodium ions and hydrogen peroxide; Hap43-induced; Spider biofilm induced
C3_01170W_A	orf19.3154	58.6731	47.6426	40.5796	60.8081	-0.068473	0.935288	Ortholog(s) have role in inner mitochondrial membrane organization and integral component of mitochondrial inner membrane localization
C3_01180C_A	orf19.3156	32.6555	27.7382	96.5235	105.861	1.74463	0.000848373	Protein of unknown function; induced by Mnl1 under weak acid stress
C3_01190C_A	orf19.3158	35.4697	25.263	33.4244	50.5132	0.466844	0.36233	Ortholog of S. cerevisiae : RMD1, C. glabrata CBS138 : CAGL0M10483g, C. dubliniensis CD36 : Cd36_81090, C. parapsilosis CDC317 : CPAR2_101950 and Candida tenuis NRRL Y-1498 : CANTEDRAFT_109620
C3_01210C_A	orf19.1730	54.0094	53.7136	43.6411	31.2569	-0.524329	0.303135	HMG-box protein; Spider biofilm repressed
C3_01220W_A	orf19.1729	11.449	14.8269	18.5718	17.193	0.444797	0.498263	Putative transcription factor with zinc finger DNA-binding motif
C3_01230C_A	orf19.1728	11.2801	14.1393	9.49373	8.00093	-0.539015	0.547074	Ortholog of C. dubliniensis CD36 : Cd36_81190, C. parapsilosis CDC317 : CPAR2_503840, Debaryomyces hansenii CBS767 : DEHA2A09042g and Pichia stipitis Pignal : PICST_42519
C3_01260C_A	orf19.1725	20.0017	18.8026	16.5352	18.2262	-0.158729	0.861065	Putative adhesin-like protein; highly expressed in white cells during pheromone response; required for adhesion, hyphal growth and biofilm formation
C3_01270W_A	orf19.1724	1.34146	0.396214	1.37156	8.30798	2.47778	0.337697	Protein of unknown function; induced by nitric oxide independent of Yhb1p
C3_01280W_A	orf19.1723	21.5746	22.9401	33.8664	37.3168	0.677255	0.234109	Ortholog(s) have role in response to purine-containing compound
C3_01290W_A	orf19.1722	26.6852	19.7219	4.07579	7.64944	-1.98473	0.720559	Ortholog of Candida albicans WO-1 : CAWG_02462
C3_01310W_A	orf19.1720	7.69894	7.08425	7.98519	22.9237	1.06406	0.0268332	Ortholog(s) have role in mitotic recombination
C3_01340W_A	orf19.1717	4.89201	4.60009	7.65574	6.85519	0.612341	0.405483	Ortholog of C. dubliniensis CD36 : Cd36_81270, C. parapsilosis CDC317 : CPAR2_502880, Candida tenuis NRRL Y-1498 : CANTEDRAFT_101483 and Debaryomyces hansenii CBS767 : DEHA2A11990g
C3_01420C_A	orf19.1709	1775.84	1648.44	1391.41	954.423	-0.545703	0.309672	Sterol carrier domain protein; alkaline downregulated; colony morphology-related gene regulation by Ssn6; Spider biofilm induced
C3_01430W_A	orf19.1708	91.108	68.803	61.7263	137.996	0.320729	0.59407	Protein of unknown function; Spider biofilm induced
C3_01440C_A	orf19.1707	15.4452	43.9898	30.4555	50.7986	0.451127	0.650584	Ortholog of Candida albicans WO-1 : CAWG_02476
C3_01510W_A	orf19.1698	24.645	26.0322	29.789	19.6835	-0.0347077	0.969005	Ortholog(s) have phosphatidate phosphatase activity, role in actin cytoskeleton organization, cellular lipid metabolic process and actin cortical patch localization
C3_01520C_A	orf19.1697	231.76	175.011	116.968	205.106	-0.336822	0.584405	Ortholog(s) have role in cytoplasmic translation, poly(A)+ mRNA export from nucleus and cytoplasm, polysomal ribosome localization
C3_01540W_A	orf19.1691	17.213	9.53255	327.627	140.042	4.12812	0.000848373	Plasma-membrane-localized protein; filament induced; Hog1, ketoconazole, fluconazole and hypoxia-induced; regulated by Nrg1, Tup1, Upc2; induced by prostaglandins; flow model biofilm induced; rat catheter and Spider biofilm repressed
C3_01560W_A	orf19.1687	88.2205	75.1331	98.329	172.036	0.726909	0.146844	Ortholog of S. cerevisiae Prp43, an RNA helicase in the DEAH-box family that functions in both RNA polymerase I and polymerase II transcript metabolism; Hap43-induced gene
C3_01570W_A	orf19.1686	9.3244	11.5948	12.1974	11.077	0.153915	0.853726	Has domain(s) with predicted phosphotransferase activity, alcohol group as acceptor activity and role in carbohydrate metabolic process
C3_01590W_A	orf19.1684	20.9042	23.4715	27.8381	22.7518	0.189078	0.780628	Ortholog of C. dubliniensis CD36 : Cd36_81500, C. parapsilosis CDC317 : CPAR2_503620, Candida tenuis NRRL Y-1498 : CANTEDRAFT_93693 and Debaryomyces hansenii CBS767 : DEHA2D15268g
C3_01610W_A	orf19.1682	261.176	280.482	223.065	181.196	-0.422094	0.460783	Membrane protein; Hap43p-repressed gene; repressed by nitric oxide
C3_01620W_A	orf19.1681	8.59637	10.2537	11.9161	8.01259	0.0802773	0.958106	Ortholog of C. dubliniensis CD36 : Cd36_81530, C. parapsilosis CDC317 : CPAR2_503590, Candida tenuis NRRL Y-1498 : CANTEDRAFT_115755 and Debaryomyces hansenii CBS767 : DEHA2D15334g
C3_01640C_A	orf19.1679	2.27577	2.59265	3.61488	2.36364	0.296335	0.853334	Ortholog of C. dubliniensis CD36 : Cd36_81550, C. parapsilosis CDC317 : CPAR2_503570, Candida tenuis NRRL Y-1498 : cten_CGOB_00261 and Debaryomyces hansenii CBS767 : DEHA2D15378g
C3_01660W_A	orf19.1678	207.793	162.168	280.073	311.828	0.677979	0.141412	Protein of unknown function; transcript detected on high-resolution tiling arrays
C3_01670W_A	orf19.1677	91.3952	70.4203	165.764	159.377	1.00671	0.0152918	Protein of unknown function; transcript detected on high-resolution tiling arrays
C3_01680C_A	orf19.1676	40.3825	42.6142	50.5081	58.803	0.397314	0.472063	Predicted potassium ion transporter; Spider biofilm induced
C3_01690W_A	orf19.1675	40.8721	48.4623	51.0889	56.7777	0.271959	0.657948	Ortholog(s) have role in positive regulation of catalytic activity
C3_01720C_A	orf19.1672	82.4495	104.315	76.2142	68.586	-0.367157	0.540733	Alpha subunit of COPI vesicle coatomer complex; role in ER to Golgi vesicle-mediated transport, retrograde vesicle-mediated transport, Golgi to ER transport; flow model biofilm repressed
C3_01740C_A	orf19.1671.1	1520.72	1606.24	789.942	467.636	-1.31411	0.00219792	Predicted ORF added to Assembly 21 based on sequence re-analysis
C3_01770C_A	orf19.1668	15.4225	13.2895	30.434	29.3175	1.05732	0.0114985	Protein of unknown function; expression downregulated in an ssr1 null mutant
C3_01780C_A	orf19.1667.1	51.0247	42.295	58.0594	55.8441	0.28756	0.802247	Ortholog(s) have role in mitochondrial respiratory chain complex IV assembly and mitochondrial intermembrane space localization
C3_01790C_A	orf19.1667	9.87483	11.0773	19.9122	19.2307	0.901658	0.0363531	Protein with a predicted SWI/SNF-related matrix-associated actin-dependent regulator of chromatin subfamily domain; Hap43-repressed gene
C3_01800C_A	orf19.1666	51.6273	60.6189	58.4411	46.9782	-0.0905288	0.909704	Ortholog of Dig2, a MAP kinase-responsive inhibitor of Ste12; regulates mating-specific genes and invasive growth in S. cerevisiae; induced by alpha pheromone in SpiderM medium
C3_01820W_A	orf19.1664	8.31964	7.85168	8.53144	7.51605	-0.0110902	0.989098	Protein of unknown function; expression downregulated in an ssr1 null mutant
C3_01850W_A	orf19.1662	73.6881	85.4215	70.1013	106.744	0.152467	0.837315	Ortholog(s) have structural constituent of ribosome activity and mitochondrial small ribosomal subunit localization
C3_01890C_A	orf19.1658	254.219	208.016	260.243	293.928	0.261704	0.699692	Ortholog(s) have cell cortex localization
C3_01900C_A	orf19.1656	4.37052	6.49813	14.3146	6.82175	0.95955	0.0817544	Protein with a predicted FYVE/PHD zinc finger domain; Hap43-repressed; Spider biofilm induced
C3_01910C_A	orf19.1655.3	1663.55	2094.69	1788.36	1363.13	-0.254027	0.694338	Ortholog(s) have phosphatidic acid binding, phosphatidylinositol-3,5-bisphosphate binding, phosphatidylinositol-3-phosphate binding, sphingolipid binding activity
C3_01940C_A	orf19.1654	44.5694	50.3863	58.4543	44.9425	0.122865	0.886461	Predicted membrane protein; induced by prostaglandins
C3_01950C_A	orf19.1653	136.941	126.475	77.4127	69.2315	-0.845026	0.0486455	Has domain(s) with predicted integral component of membrane localization
C3_01970C_A	orf19.1651	8.01498	7.74753	4.74925	4.70879	-0.736884	0.550719	Ortholog of C. dubliniensis CD36 : Cd36_81960, Pichia stipitis Pignal : psti_CGOB_00163, Candida tropicalis MYA-3404 : CTRG_02378 and Candida albicans WO-1 : CAWG_02525
C3_02010C_A	orf19.1647	4.45059	3.43472	2.09173	1.73963	-1.04131	0.331755	Ortholog(s) have role in ascospore wall assembly
C3_02020W_A	orf19.1646	138.888	111.808	119.168	213.142	0.406589	0.514505	Ortholog(s) have rRNA primary transcript binding activity
C3_02030W_A	orf19.1643	75.6496	71.7237	79.9377	79.4437	0.113009	0.878881	Ortholog(s) have serine-type endopeptidase activity, role in regulation of mitochondrion organization, signal peptide processing and mitochondrial inner membrane localization
C3_02040C_A	orf19.1642	389.468	323.029	266.531	512.395	0.128603	0.876368	Ortholog of S. cerevisiae Loc1, a nuclear protein involved in asymmetric localization of ASH1 mRNA in S. cerevisiae; Hap43-induced gene; Spider biofilm induced
C3_02060W_A	orf19.1641	4.64078	4.79745	12.879	11.5144	1.3699	0.0206576	Ortholog(s) have extracellular region localization
C3_02070C_A	orf19.1639	1.34798	1.52017	3.94673	3.56373	1.38878	0.15895	Has domain(s) with predicted oxidoreductase activity and role in oxidation-reduction process
C3_02080W_A	orf19.1638	7.4308	10.052	19.2217	16.7275	1.04002	0.0138325	Has domain(s) with predicted zinc ion binding activity, role in ER to Golgi vesicle-mediated transport, intracellular protein transport and COPII vesicle coat localization
C3_02090C_A	orf19.1637	19.6691	20.5456	17.6578	15.243	-0.289598	0.694599	Ortholog of C. dubliniensis CD36 : Cd36_82070, C. parapsilosis CDC317 : CPAR2_202790, Candida tenuis NRRL Y-1498 : CANTEDRAFT_114065 and Debaryomyces hansenii CBS767 : DEHA2D17468g
C3_02120W_A	orf19.1634	17.6952	22.3346	23.8192	22.4185	0.207995	0.784419	Has domain(s) with predicted fatty-acyl-CoA binding activity
C3_02140C_A	orf19.1632	28.5131	38.0519	16.0637	11.1875	-1.28844	0.00280222	Has domain(s) with predicted catalytic activity
C3_02160C_A	orf19.1630	63.3431	64.2744	61.8914	56.2128	-0.111765	0.885619	Ortholog(s) have P-body localization
C3_02180C_A	orf19.1626	103.133	104.231	68.5467	122.931	-0.114991	0.885155	Deoxyhypusine synthase; catalyzes formation of deoxyhypusine, the first step in hypusine biosynthesis; Spider biofilm repressed
C3_02190C_A	orf19.1625	261.445	342.476	225.285	209.892	-0.47276	0.351446	Putative ubiquinone oxidoreductase; repressed by nitric oxide; Hap43p-repressed
C3_02200W_A	orf19.1624.1	13.117	5.81134	20.1169	21.1921	1.12591	0.725348	Ortholog of C. parapsilosis CDC317 : CPAR2_405060 and Candida orthopsilosis Co 90-125 : CORT_0C04470
C3_02210C_A	orf19.1624	15.2191	23.0295	18.3274	20.5191	0.0223793	0.979948	Non-catalytic subunit of N-terminal acetyltransferase of the NatC type; flow model biofilm repressed
C3_02250C_A	orf19.1620	0.828385	0	0	0.334589	-1.30791	1	Protein of unknown function; induced by alpha pheromone in SpiderM medium
C3_02260C_A	orf19.1619	49.7179	47.8147	81.1317	65.8154	0.59134	0.216495	Putative kinase subunit of RNA polymerase II carboxy-terminal domain kinase I; possibly an essential gene, disruptants not obtained by UAU1 method
C3_02270W_A	orf19.1618.1	149.649	137.605	149.398	150.54	0.0623362	0.959611	Ortholog of C. dubliniensis CD36 : Cd36_82240, C. parapsilosis CDC317 : CPAR2_405130, Candida tenuis NRRL Y-1498 : CANTEDRAFT_127317 and Debaryomyces hansenii CBS767 : DEHA2G02244g
C3_02290W_A	orf19.1617	34.8305	32.2654	32.7791	13.5764	-0.533487	0.322268	Protein similar to S. cerevisiae Ydr282cp; transposon mutation affects filamentous growth; Hap43p-repressed gene
C3_02330C_A	orf19.1611	23.3115	18.9345	16.5103	16.3466	-0.362618	0.599895	Protein of unknown function; Spider biofilm induced
C3_02340W_A	orf19.1610	3.11208	4.96359	3.34099	1.91062	-0.620822	0.537998	Putative protein of unknown function, transcription is activated in the presence of elevated CO2
C3_02350W_A	orf19.1609	143.57	126.75	120.047	217.71	0.321315	0.615138	Ortholog(s) have role in endonucleolytic cleavage in ITS1 to separate SSU-rRNA from 5.8S rRNA and LSU-rRNA from tricistronic rRNA transcript (SSU-rRNA, 5.8S rRNA, LSU-rRNA) and 90S preribosome, nucleolus localization
C3_02360C_A	orf19.1608	7.77635	4.21455	5.26837	5.00106	-0.223584	0.800087	Has domain(s) with predicted catalytic activity, sulfuric ester hydrolase activity and role in metabolic process
C3_02390W_A	orf19.1606	18.9207	14.0445	11.0725	15.7536	-0.297306	0.648078	Protein of unknown function; Plc1-regulated
C3_02410C_A	orf19.229	18.8814	18.8217	15.082	19.3381	-0.131431	0.874195	Ortholog(s) have ubiquitin-protein transferase activity, role in ubiquitin-dependent protein catabolic process and chromosome, centromeric region, site of double-strand break localization
C3_02420C_A	orf19.230	8.55991	11.27	7.60231	14.3765	0.148436	0.845791	Ortholog of S. cerevisiae Pet111; a mitochondrial translational activator specific for the COX2 mRNA; Hap43-induced gene
C3_02490C_A	orf19.239	53.1553	55.0297	33.947	57.7071	-0.239229	0.73131	Putative ATP-dependent helicase; induced by nitric oxide
C3_02530W_A	orf19.242.2	625.132	622.584	467.482	592.631	-0.235071	0.769909	Protein involved in ER stress response; acts synergistically with Aut7p to regulate unfolded protein response and mitochondrial function under ER stress
C3_02570W_A	orf19.246	5.46953	5.56824	4.59574	3.8543	-0.385419	0.694035	Predicted metalloendopeptidase; Spider biofilm induced
C3_02580C_A	orf19.247	22.4486	16.3463	15.3393	10.2342	-0.601216	0.521985	Ortholog(s) have role in endosome organization, regulation of protein localization and BLOC-1 complex localization
C3_02620C_A	orf19.252	68.9666	54.8599	34.8562	58.2443	-0.411459	0.610488	Protein of unknown function; S. cerevisiae ortholog Fmp37 which localizes to mitochondria; Hap43-repressed; Spider biofilm repressed
C3_02630C_A	orf19.254	58.9488	56.357	117.087	111.53	0.987467	0.0180474	Protein of unknown function; Hog1p-repressed; Spider biofilm induced
C3_02650W_A	orf19.257	12.3096	10.9072	14.522	16.828	0.433293	0.773106	Transcription is negatively regulated by Sfu1p; repressed by nitric oxide
C3_02660W_A	orf19.258	2.1265	0.942123	4.72889	6.35589	1.85292	0.16186	Protein of unknown function; Spider biofilm induced
C3_02670W_A	orf19.259	33.7813	27.0912	30.1671	43.8695	0.282449	0.667344	Protein with a predicted role in 60S ribosomal subunit assembly; flow model biofilm induced
C3_02690C_A	orf19.261	27.2084	31.4288	39.2873	34.4077	0.329749	0.552354	Ortholog(s) have dolichol kinase activity, role in dolichyl monophosphate biosynthetic process and endoplasmic reticulum membrane localization
C3_02710W_A	orf19.263.1	8297.51	6690.15	8649.47	9163.91	0.249185	0.72021	Protein of unknown function; gene has intron; Spider biofilm induced
C3_02720W_A	orf19.264	21.9788	18.3829	15.515	11.6152	-0.573084	0.291007	Has domain(s) with predicted protein kinase binding activity and role in regulation of cyclin-dependent protein serine/threonine kinase activity
C3_02750W_A	orf19.265	4.17881	2.41484	10.1009	11.5948	1.71826	0.00445302	Protein with a ribonuclease III domain; flow model biofilm induced; Spider biofilm induced
C3_02760C_A	orf19.267	26.428	28.8915	35.8202	44.4721	0.537474	0.281938	Protein required for normal filamentous growth; mRNA binds She3
C3_02770C_A	orf19.268	9.21287	6.4206	11.0336	6.94053	0.201282	0.824594	Ortholog(s) have role in transcription-coupled nucleotide-excision repair and Ddb1-Ckn1 complex localization
C3_02790W_A	orf19.270	314.274	219.458	103.739	101.718	-1.37728	0.00392336	Ortholog of C. parapsilosis CDC317 : CPAR2_102150, C. dubliniensis CD36 : Cd36_82780, Pichia stipitis Pignal : psti_CGOB_00155 and Candida orthopsilosis Co 90-125 : CORT_0B03450
C3_02820C_A	orf19.273	33.4443	36.1617	36.8307	47.0114	0.268464	0.656455	Protein involved in regulation of C14-methylated sterol biosynthesis; mutations increase azole sensitivity
C3_02840W_A	orf19.275	24.3104	41.0979	23.7929	47.5452	0.125198	0.94296	Ortholog(s) have RNA binding, ribonuclease MRP activity, ribonuclease P activity
C3_02850C_A	orf19.276	29.2821	30.876	23.1279	28.8584	-0.21063	0.804246	Plasma membrane-associated protein; upregulated in an azole-resistant strain that overexpresses MDR1; Hap43-repressed; Spider biofilm induced
C3_02870C_A	orf19.278	16.8719	18.1106	38.3697	57.6324	1.45643	0.000848373	Protein of unknown function; required for adhesion to abiotic substrate; Spider biofilm induced
C3_02880W_A	orf19.279	2.85132	4.54769	3.93563	1.84266	-0.356688	0.885038	Protein with a predicted D-Tyr-tRNA(Tyr) deacylase domain; Hap43-repressed gene
C3_02890C_A	orf19.280	0	0	0	0	0	1	Ortholog of C. dubliniensis CD36 : Cd36_82875 and Candida albicans WO-1 : CAWG_02609
C3_02900W_A	orf19.281	0	0	0	0	0	1	Ortholog of C. dubliniensis CD36 : Cd36_82880, C. parapsilosis CDC317 : CPAR2_102370, Candida tenuis NRRL Y-1498 : CANTEDRAFT_118463 and Pichia stipitis Pignal : PICST_32241
C3_02910W_A	orf19.284	0	0	0	0	0	1	Ortholog of C. dubliniensis CD36 : Cd36_82890, Debaryomyces hansenii CBS767 : DEHA2G01034g, Pichia stipitis Pignal : PICST_32242 and Candida guilliermondii ATCC 6260 : PGUG_04638
C3_02920W_A	orf19.285	634.967	592.42	938.794	633.352	0.357145	0.547396	Ortholog of S. cerevisiae Igo2; role in mRNA stabilization of mRNA; Spider biofilm induced
C3_02930W_A	orf19.286	7.15382	4.43719	5.76001	3.17841	-0.374914	0.809213	Has a predicted autophagy-related protein domain; transcription repressed by fluphenazine treatment
C3_02970C_A	orf19.291	31.6023	43.0241	44.0493	31.645	0.0204974	0.981077	Ortholog(s) have SUMO binding, SUMO ligase activity, metalloendopeptidase activity
C3_02980C_A	orf19.292	0	0	0	0	0	1	Ortholog of C. parapsilosis CDC317 : CPAR2_102390, C. dubliniensis CD36 : Cd36_82960, Candida tenuis NRRL Y-1498 : CANTEDRAFT_133198 and Lodderomyces elongisporus NRLL YB-4239 : LELG_02116
C3_02990C_A	orf19.295	0	0	0	0	0	1	Ortholog of C. dubliniensis CD36 : Cd36_82970, Lodderomyces elongisporus NRLL YB-4239 : LELG_02117, Debaryomyces hansenii CBS767 : DEHA2G01012g and Candida lusitaniae ATCC 42720 : CLUG_03529
C3_03000W_A	orf19.296	0	0	0	0	0	1	Ortholog of C. dubliniensis CD36 : Cd36_82980, C. parapsilosis CDC317 : CPAR2_102360, Candida tenuis NRRL Y-1498 : cten_CGOB_00165 and Debaryomyces hansenii CBS767 : DEHA2G00990g
C3_03020W_A	orf19.298	16.8911	41.0985	5.23709	4.84172e-06	-3.46896	0.779145	Protein of unknown function; flow model biofilm induced
C3_03060W_A	orf19.302	9.30828	11.9969	13.3023	7.51933	-0.0331211	0.98068	Ortholog(s) have Rab guanyl-nucleotide exchange factor activity, role in ER to Golgi vesicle-mediated transport and TRAPPI protein complex, TRAPPII protein complex, TRAPPIII protein complex localization
C3_03070W_A	orf19.304	17.3327	17.9841	20.3155	27.2776	0.430396	0.421422	Putative transporter similar to MDR proteins; fungal-specific; Spider biofilm induced
C3_03080W_A	orf19.305	22.7677	27.6643	21.6074	15.0232	-0.461289	0.412738	Protein of unknown function; upregulated in a cyr1 null mutant
C3_03100C_A	orf19.307	39.3354	34.0303	47.0635	49.5038	0.396428	0.445873	Ortholog(s) have transcription coactivator activity, role in histone acetylation, transcription by RNA polymerase II and Ada2/Gcn5/Ada3 transcription activator complex, SAGA complex, SLIK (SAGA-like) complex localization
C3_03110W_A	orf19.308	1.41749	1.25601	7.26907	10.8781	2.76295	0.000848373	Ortholog(s) have role in nucleobase-containing compound transport, regulation of fungal-type cell wall organization, regulation of phospholipid translocation and plasma membrane localization
C3_03130C_A	orf19.310	0	0	0	0	0	1	Putative mitochondrial protein with a predicted role in cell wall biogenesis; possibly an essential gene, disruptants not obtained by UAU1 method
C3_03150W_A	orf19.314	12.45	16.6409	19.2233	14.6597	0.219993	0.768939	Ortholog of S. cerevisiae : STB6, C. glabrata CBS138 : CAGL0L05016g, C. dubliniensis CD36 : Cd36_83110, C. parapsilosis CDC317 : CPAR2_103210 and Candida tenuis NRRL Y-1498 : CANTEDRAFT_133418
C3_03160C_A	orf19.315	29.5792	41.9861	30.3896	19.9507	-0.507548	0.73137	Ortholog of C. dubliniensis CD36 : Cd36_83120, C. parapsilosis CDC317 : CPAR2_103220, Candida tenuis NRRL Y-1498 : CANTEDRAFT_112860 and Debaryomyces hansenii CBS767 : DEHA2G08360g
C3_03190C_A	orf19.318	29.6485	31.8199	40.9684	28.4559	0.175596	0.80033	Ortholog(s) have role in protein maturation by [2Fe-2S] cluster transfer, protein maturation by [4Fe-4S] cluster transfer and mitochondrial matrix localization
C3_03200C_A	orf19.319	116.711	61.2049	63.9264	40.4059	-0.77001	0.392754	Ortholog of S. cerevisiae : YDR286C, C. glabrata CBS138 : CAGL0H01111g, C. dubliniensis CD36 : Cd36_83160, C. parapsilosis CDC317 : CPAR2_101820 and Candida tenuis NRRL Y-1498 : CANTEDRAFT_113333
C3_03210W_A	orf19.320	14.4928	12.3176	539.229	268.316	4.91268	0.000848373	Predicted short chain dehydrogenase; Spider biofilm induced
C3_03230C_A	orf19.321	5.30451	6.79723	6.63337	6.52645	0.120924	0.903794	Ortholog(s) have L-methionine transmembrane transporter activity and role in methionine import across plasma membrane
C3_03240C_A	orf19.322	1.02213	0.452844	0.783796	0.825689	0.125907	1	Ortholog of Candida albicans WO-1 : CAWG_02670
C3_03250W_A	orf19.323	29.7225	26.1143	19.5237	28.3081	-0.223244	0.730688	Putative haloacid dehalogenase; localized to plasma membrane
C3_03260W_A	orf19.325	50.7148	45.139	48.2102	54.4646	0.0991753	0.901632	Putative mRNA cleavage and polyadenlylation factor; heterozygous null mutant exhibits hypersensitivity to parnafungin and cordycepin in the C. albicans fitness test
C3_03270W_A	orf19.326	52.4673	34.8676	31.6118	15.5154	-0.889997	0.163701	Protein of unknown function; Spider biofilm repressed
C3_03300C_A	orf19.329	65.492	70.2482	104.64	107.858	0.646599	0.162135	Putative pre-mRNA branch point binding protein; role in mRNA splicing via spliceosome; Spider biofilm repressed
C3_03310C_A	orf19.331	26.824	33.7282	25.2709	27.8598	-0.188634	0.821576	Ortholog(s) have S-adenosylmethionine-dependent methyltransferase activity, protein methyltransferase activity, role in peptidyl-glutamine methylation, regulation of translation and eRF1 methyltransferase complex localization
C3_03330C_A	orf19.332	35.3015	31.06	37.7744	44.1537	0.304011	0.608822	Member of a complex that contains Prp19; stabilizes U6 snRNA in catalytic forms of the spliceosome containing U2, U5, and U6 snRNAs; Spider biofilm induced
C3_03340C_A	orf19.332.1	422.453	403.307	353.208	406.212	-0.120825	0.873608	Ortholog of C. parapsilosis CDC317 : CPAR2_102640, C. dubliniensis CD36 : Cd36_83290, Candida tenuis NRRL Y-1498 : CANTEDRAFT_98613 and Lodderomyces elongisporus NRLL YB-4239 : LELG_02758
C3_03370C_A	orf19.334	709.481	642.544	563.18	703.1	-0.0945249	0.909522	Protein of unknown function; flow model biofilm induced; Spider biofilm induced; regulated by Sef1, Sfu1, and Hap43
C3_03380W_A	orf19.335	9.8071	9.67097	7.43946	10.1371	-0.148197	0.850221	Sef1p-, Sfu1p-, and Hap43p-regulated gene
C3_03410C_A	orf19.338	107.926	113.448	154.933	97.0076	0.186598	0.812316	Putative glycoside hydrolase; stationary phase enriched protein; Hog1p-downregulated; shows colony morphology-related gene regulation by Ssn6p
C3_03430C_A	orf19.340	4.76893	3.43334	14.6277	8.66788	1.50596	0.120837	Ortholog(s) have role in ATP export, protein targeting to membrane, protein targeting to vacuole and ESCRT I complex localization
C3_03440C_A	orf19.341	79.9664	61.8406	17.1759	42.4216	-1.2506	0.00495977	Putative spermidine export pump; fungal-specific (no human or murine homolog)
C3_03460C_A	orf19.344	14.8487	17.4289	51.3125	29.4421	1.32301	0.00545557	Protein of unknown function; upregulated by fluphenazine treatment or in an azole-resistant strain that overexpresses CDR1 and CDR2; transcript possibly regulated by Tac1
C3_03470W_A	orf19.345	13.452	15.2899	13.0186	14.9135	-0.0412239	0.966964	Succinate semialdehyde dehydrogenase; for utilization of gamma-aminobutyrate (GABA) as a nitrogen source; part of 4-aminobutyrate and glutamate degradation pathways; rat catheter biofilm induced
C3_03510C_A	orf19.349	13.4009	18.9659	16.6988	15.9374	0.0119583	0.988098	Ortholog(s) have role in aerobic respiration, mRNA metabolic process
C3_03530W_A	orf19.351	20.122	23.7728	18.1731	14.8099	-0.412328	0.646159	Ortholog of S. cerevisiae : MAY24, C. glabrata CBS138 : CAGL0L08382g, C. dubliniensis CD36 : Cd36_83540, C. parapsilosis CDC317 : CPAR2_404520 and Candida tenuis NRRL Y-1498 : CANTEDRAFT_115795
C3_03540W_A	orf19.352	52.0611	53.5989	36.8167	55.0059	-0.202507	0.769787	Ortholog of C. dubliniensis CD36 : Cd36_83550, C. parapsilosis CDC317 : CPAR2_404510, Debaryomyces hansenii CBS767 : DEHA2B13794g and Pichia stipitis Pignal : PICST_30078
C3_03560W_A	orf19.354	15.4366	22.165	20.9646	12.8455	-0.153342	0.847202	Ortholog(s) have aminopeptidase activity, role in protein processing, protein stabilization and extrinsic component of mitochondrial inner membrane, nucleus localization
C3_03570C_A	orf19.355	0.331484	0.979071	0.338921	1.5174	0.502269	1	Has domain(s) with predicted oxidoreductase activity and role in oxidation-reduction process
C3_03590W_A	orf19.357	46.4415	47.5349	39.6626	35.4563	-0.323123	0.873765	Ortholog(s) have role in inner mitochondrial membrane organization, mitochondrion inheritance, mitochondrion morphogenesis, negative regulation of proteolysis, protein folding, replicative cell aging
C3_03620C_A	orf19.6957	0	0	0	0	0	1	Protein of unknown function
C3_03670W_A	orf19.6952	74.2256	57.0274	62.3293	109.1	0.385264	0.865588	Ortholog(s) have DNA binding, chromatin binding, histone deacetylase activity
C3_03680W_A	orf19.6951	57.6457	54.2836	41.1417	40.4797	-0.45557	0.856279	Ortholog(s) have sphinganine-1-phosphate aldolase activity and role in calcium-mediated signaling, cellular response to starvation, sphingolipid metabolic process
C3_03690W_A	orf19.6950	12.2148	11.1416	11.9838	20.0247	0.454635	0.933731	Putative vacuolar membrane transporter for cationic amino acids; Spider biofilm induced
C3_03700C_A	orf19.6949	1.89378	2.51705	11.6176	11.4736	2.38822	0.479491	Ortholog of Candida albicans WO-1 : CAWG_02687
C3_03740W_A	orf19.6943	94.43	98.4381	53.2436	68.0551	-0.66905	0.298902	Predicted ORF from Assembly 19; removed from Assembly 20; subsequently reinstated in Assembly 21 based on comparative genome analysis
C3_03760W_A	orf19.6941	75.0447	78.3184	88.4187	56.9459	-0.0772743	0.926447	Putative diacylglycerol acyltransferase; catalyzes the terminal step of triacylglycerol formation; flow model biofilm induced; Spider biofilm induced
C3_03770C_A	orf19.6939	82.4434	68.7279	68.9607	83.548	0.0127071	0.988139	Predicted ORF from Assembly 19; removed from Assembly 20; restored based on comparative genome analysis
C3_03780W_A	orf19.6940	69.1616	48.2229	62.1795	34.5941	-0.278557	0.884215	Protein of unknown function
C3_03820C_A	orf19.6934	28.436	41.1543	43.8834	34.8392	0.177892	0.800232	Ortholog(s) have role in protein insertion into mitochondrial membrane from inner side and integral component of mitochondrial inner membrane localization
C3_03830W_A	orf19.6933	24.6026	25.0339	21.4574	19.5467	-0.275636	0.688141	Ortholog(s) have peptidyl-prolyl cis-trans isomerase activity, protein phosphatase regulator activity, role in mitotic spindle organization, response to osmotic stress and protein phosphatase type 2A complex localization
C3_03840C_A	orf19.6931	29.3618	38.3232	39.0981	45.1786	0.316297	0.588388	Putative cleavage factor I subunit; heterozygous null mutant exhibits hypersensitivity to parnafungin and cordycepin in the C. albicans fitness test
C3_03860W_A	orf19.6929	57.5622	58.1065	43.302	59.1542	-0.174991	0.821146	Ortholog(s) have acid phosphatase activity, protein tyrosine phosphatase activity, metal-dependent activity
C3_03920W_A	orf19.6923.1	181.354	152.086	136.584	57.5536	-0.78035	0.333264	Ortholog of C. parapsilosis CDC317 : CPAR2_502850, Candida tenuis NRRL Y-1498 : CANTEDRAFT_135869, Debaryomyces hansenii CBS767 : DEHA2F18260g and Pichia stipitis Pignal : psti_CGOB_00119
C3_03930W_A	orf19.6923	57.4383	56.4517	39.6734	30.3956	-0.700793	0.136503	Ortholog(s) have chromatin binding activity, role in RNA polymerase II transcriptional preinitiation complex assembly and transcription factor TFIID complex localization
C3_03940C_A	orf19.2813	0	78.9438	0	89.9633	0.188511	0.962152	Ortholog of Candida albicans WO-1 : CAWG_02711
C3_03970W_A	orf19.6922	0	0	0	0	0	1	Dubious open reading frame
C3_03980C_A	orf19.2812	6.31531	4.87639	8.23265	7.1422	0.458143	0.521093	Protein of unknown function; Spider biofilm induced
C3_04040W_A	orf19.2804	0	0	0	0	0	1	Ortholog of C. dubliniensis CD36 : Cd36_83980, C. parapsilosis CDC317 : CPAR2_102620, Candida tenuis NRRL Y-1498 : CANTEDRAFT_134550 and Debaryomyces hansenii CBS767 : DEHA2D12100g
C3_04080W_A	orf19.913.2	1109.65	1022.35	632.045	534.544	-0.869906	0.713802	Ortholog of subunit 6 of the ubiquinol cytochrome-c reductase complex, a component of the mitochondrial inner membrane electron transport chain; Hap43-repressed gene
C3_04100W_A	orf19.5854.1	11.1203	6.82164	4.26367	4.49156	-1.03512	0.397575	Ortholog of Candida albicans WO-1 : CAWG_02725
C3_04120C_A	orf19.5856	23.3229	26.4524	20.3884	20.4733	-0.284678	0.67213	Membrane-localized protein of unknown function
C3_04130W_A	orf19.5857	39.0534	33.0944	42.7971	27.3031	-0.0415342	0.962399	Ortholog of C. dubliniensis CD36 : Cd36_84070, C. parapsilosis CDC317 : CPAR2_102720, Candida tenuis NRRL Y-1498 : CANTEDRAFT_98617 and Debaryomyces hansenii CBS767 : DEHA2D07392g
C3_04170W_A	orf19.5860	3.52342	7.80507	55.8381	31.7832	2.95133	0.0110995	Predicted ORF from Assembly 19; removed from Assembly 20; subsequently reinstated in Assembly 21 based on comparative genome analysis
C3_04190W_A	orf19.5861.1	20.5721	11.3928	18.7331	18.6957	0.227656	0.896254	Protein of unknown function; Spider biofilm induced
C3_04210W_A	orf19.5863	9.36826	8.9651	6.60911	6.05423	-0.533814	0.653239	Ortholog of C. dubliniensis CD36 : Cd36_84160, Candida tenuis NRRL Y-1498 : cten_CGOB_00085, Debaryomyces hansenii CBS767 : DEHA2B08404g and Pichia stipitis Pignal : PICST_67031
C3_04230W_A	orf19.5865	17.3009	13.1025	25.6264	35.6763	1.01172	0.0163585	Ortholog(s) have RNA-dependent ATPase activity, role in generation of catalytic spliceosome for first transesterification step, snoRNA splicing and U2-type catalytic step 1 spliceosome localization
C3_04240C_A	orf19.5866	6.78214	6.86801	0.742959	0.782669	-3.16144	0.43936	Ortholog of Candida albicans WO-1 : CAWG_02737
C3_04260W_A	orf19.5869	85.6139	67.7572	94.2939	90.166	0.266281	0.667288	Ortholog(s) have role in metal ion transport, protein targeting to vacuole, ubiquitin-dependent protein catabolic process and endoplasmic reticulum, fungal-type vacuole membrane localization
C3_04310C_A	orf19.5874	1.20249	0.152214	1.05383	0.555077	0.248101	1	Ortholog of C. dubliniensis CD36 : Cd36_84250, C. parapsilosis CDC317 : CPAR2_806160, Candida tenuis NRRL Y-1498 : CANTEDRAFT_137075 and Debaryomyces hansenii CBS767 : DEHA2F11462g
C3_04330C_A	orf19.5876	422.674	440.354	514.661	379.77	0.0515641	0.950611	Protein of unknown function; Cyr1-repressed; induced by alpha pheromone in SpiderM medium; rat catheter and Spider biofilm induced
C3_04350C_A	orf19.5879	3.42074	5.75899	14.0336	12.2968	1.5202	0.0326131	Has domain(s) with predicted oxidoreductase activity and role in metabolic process
C3_04360W_A	orf19.5880	18.3484	21.2797	14.8875	10.8785	-0.621052	0.203461	Putative voltage-gated chloride channel; predicted role in copper ion and iron ion homeostasis; flow model biofilm induced
C3_04370C_A	orf19.5884	25.3257	23.6321	35.6326	55.4608	0.895811	0.0455041	Putative nucleolar preribosomal-associated protein; decreased transcription is observed upon benomyl treatment or in an azole-resistant strain that overexpresses MDR1; Spider biofilm induced
C3_04380C_A	orf19.5885	643.63	551.415	559.972	705.083	0.0821348	0.922213	Putative U3 snoRNP protein; flucytosine induced
C3_04410C_A	orf19.5890	32.3256	37.3227	33.7441	28.7912	-0.155417	0.83344	Ortholog of C. dubliniensis CD36 : Cd36_84350, C. parapsilosis CDC317 : CPAR2_806070, Candida tenuis NRRL Y-1498 : CANTEDRAFT_133308 and Debaryomyces hansenii CBS767 : DEHA2F11682g
C3_04420W_A	orf19.5892	23.9712	25.244	19.6217	10.9116	-0.68872	0.126822	Ortholog of S. cerevisiae Hul4; similar to hect domain E3 ubiquitin-protein ligases; Hap43-repressed gene
C3_04440C_A	orf19.5894	0.828106	1.2474	4.19108	2.20755	1.6243	0.0928309	Ortholog of S. cerevisiae : YEL023C, C. glabrata CBS138 : CAGL0I03168g, C. dubliniensis CD36 : Cd36_84380, Candida tenuis NRRL Y-1498 : CANTEDRAFT_101635 and Pichia stipitis Pignal : PICST_19384
C3_04450C_A	orf19.5896	0.371124	4.93268	0.426881	2.09859	-1.07048	0.491867	Protein of unknown function; induced by alpha pheromone in SpiderM medium
C3_04460W_A	orf19.5897	19.8359	22.7478	26.4646	17.1511	0.0345459	0.969801	Ortholog(s) have role in positive regulation of TORC1 signaling and Seh1-associated complex, extrinsic component of fungal-type vacuolar membrane localization
C3_04510W_A	orf19.5905	493.089	367.499	309.204	757.557	0.309844	0.616873	Protein of unknown function; Hap43-induced; F-12/CO2 early biofilm induced
C3_04540C_A	orf19.5910	12.2777	17.628	19.0912	24.0145	0.52746	0.300064	Putative histone acetyltransferase complex subunit; induced upon low-level peroxide stress; Spider biofilm induced
C3_04590W_A	orf19.5917.3	171.136	156.433	152.16	195.45	0.0856743	0.915456	RNA binding protein required for export of poly(A)+ mRNA from the nucleus; Spider biofilm repressed
C3_04600C_A	orf19.5918	41.5263	38.7845	38.7284	27.199	-0.284716	0.795019	Ortholog of Candida albicans WO-1 : CAWG_02773
C3_04620C_A	orf19.5920	120.326	105.607	96.6417	115.166	-0.0931387	0.912475	Ortholog of C. dubliniensis CD36 : Cd36_84570, C. parapsilosis CDC317 : CPAR2_404420, Candida tenuis NRRL Y-1498 : CANTEDRAFT_115339 and Debaryomyces hansenii CBS767 : DEHA2G13618g
C3_04630W_A	orf19.5921	64.0556	63.1171	28.8398	26.8386	-1.1916	0.00392336	Ortholog(s) have glyoxysome localization
C3_04650W_A	orf19.5925	2.15718	2.58605	7.97898	10.0455	1.92602	0.0145614	Ortholog of S. cerevisiae : AIM6, C. glabrata CBS138 : CAGL0C05533g, C. dubliniensis CD36 : Cd36_84610, C. parapsilosis CDC317 : CPAR2_404550 and Candida tenuis NRRL Y-1498 : CANTEDRAFT_115337
C3_04690C_A	orf19.5929	17.5794	14.9383	14.5853	11.8728	-0.297518	0.694159	Putative protein of unknown function, transcription is positively regulated by Tbf1p
C3_04700W_A	orf19.5930	18.6818	20.517	36.1168	26.7818	0.682218	0.177218	Ortholog(s) have structural constituent of nuclear pore activity
C3_04720C_A	orf19.5932	13.4563	12.3601	41.539	39.1802	1.64463	0.000848373	Protein of unknown function; Spider biofilm induced
C3_04730C_A	orf19.5933	15.0401	14.2664	12.0506	10.8255	-0.357374	0.593139	Protein of unknown function; transcript induced by benomyl treatment
C3_04740C_A	orf19.5934	11.5484	13.0856	11.0024	10.2901	-0.210304	0.770473	Ortholog(s) have DNA topoisomerase type I activity
C3_04750W_A	orf19.5935	13.8359	12.9658	22.1083	18.7841	0.609505	0.218252	Ortholog of C. dubliniensis CD36 : Cd36_84710, C. parapsilosis CDC317 : CPAR2_807470, Candida tenuis NRRL Y-1498 : CANTEDRAFT_136475 and Debaryomyces hansenii CBS767 : DEHA2B08844g
C3_04780C_A	orf19.5941	71.0337	93.6599	56.315	37.9497	-0.804994	0.0753528	Ortholog(s) have role in ER to Golgi vesicle-mediated transport and COPII-coated ER to Golgi transport vesicle, integral component of Golgi membrane, integral component of endoplasmic reticulum membrane localization
C3_04790W_A	orf19.5942	11.1846	12.598	30.1634	26.1096	1.24254	0.00732107	Zinc finger protein orthologous to S. cerevisiae Itt1; repressed by adherence to polystyrene; Spider biofilm induced
C3_04800C_A	orf19.5943	22.3476	24.9528	35.4312	35.3124	0.580747	0.217744	Ortholog(s) have role in peroxisome organization and peroxisomal membrane localization
C3_04810C_A	orf19.5943.1	1942.39	1964.94	1250.1	1159.14	-0.697607	0.18152	Protein of unknown function; transcript upregulated in an RHE model of oral candidiasis; rat catheter and Spider biofilm repressed
C3_04840C_A	orf19.5952	18.9788	25.6478	63.3358	31.1765	1.0826	0.012698	Protein of unknown function; induced by nitric oxide independent of Yhb1; Sef1, Sfu1, and Hap43-induced; rat catheter and Spider biofilm induced
C3_04870W_A	orf19.5954	0.177586	0	1.08942	0.789007	3.40293	1	Ortholog(s) have ubiquitin ligase activator activity
C3_04920C_A	orf19.5961	156.065	164.717	134.095	98.1325	-0.466053	0.356233	Ortholog(s) have role in proteasome regulatory particle assembly, proteolysis and cytosol, nucleus, proteasome regulatory particle localization
C3_04940W_A	orf19.5963	43.2431	31.5187	54.6604	89.4717	0.947018	0.02593	Putative prenyltransferase; essential gene in S. cerevisiae; Spider biofilm induced
C3_04970C_A	orf19.5965	18.7301	23.5461	24.8056	19.9217	0.0813099	0.919391	Ortholog(s) have ubiquitin-ubiquitin ligase activity and role in cellular response to ethanol, positive regulation of protein ubiquitination, protein ubiquitination, ubiquitin-dependent ERAD pathway
C3_04980W_A	orf19.5966	2.54791	2.25765	0	3.43038	-0.486335	0.891058	Ortholog of Candida albicans WO-1 : CAWG_02810
C3_05010C_A	orf19.5970	11.1322	15.3001	17.0349	16.6265	0.348793	0.53451	Putative DNA repair helicase; transcriptionally induced by interaction with macrophage; fungal-specific (no human or murine homolog)
C3_05020W_A	orf19.5971	10.4988	13.1258	12.3518	15.1613	0.21983	0.752832	Ortholog of S. cerevisiae : MTC6, C. glabrata CBS138 : CAGL0I01892g, C. dubliniensis CD36 : Cd36_84990, C. parapsilosis CDC317 : CPAR2_405620 and Candida tenuis NRRL Y-1498 : CANTEDRAFT_99433
C3_05060W_A	orf19.5976	34.4578	34.027	23.9559	28.0031	-0.398411	0.465821	Protein of unknown function; ortholog of S. cerevisiae Urn1; downregulated by fluphenazine treatment, in azole-resistant strains that overexpress CDR1 and CDR2 or MDR1
C3_05080W_A	orf19.5978	1.98433	2.58569	4.02785	6.03468	1.13872	0.155398	Has domain(s) with predicted oxidoreductase activity, transferase activity, transferring acyl groups other than amino-acyl groups, zinc ion binding activity and role in oxidation-reduction process
C3_05090C_A	orf19.5980	10.0462	9.17564	13.037	11.3616	0.344053	0.600679	Protein of unknown function; Hap43-repressed gene
C3_05110W_A	orf19.5984	19.6688	13.628	29.1445	35.2418	0.951369	0.0502684	Putative protein of unknown function; homozygous transposon insertion causes decreased colony wrinkling under filamentous growth-inducing conditions, but does not block true hyphal formation in liquid media
C3_05120C_A	orf19.5985	50.6818	55.8396	41.1652	40.6719	-0.380315	0.54804	Ortholog(s) have tubulin binding activity, role in response to cold, tubulin complex assembly and cytoplasm, polysome, prefoldin complex localization
C3_05140C_A	orf19.5987	58.7606	55.2508	65.466	90.1489	0.448803	0.399456	Ortholog(s) have tRNA (guanine-N2-)-methyltransferase activity, role in tRNA methylation and tRNA (m2G10) methyltransferase complex localization
C3_05150W_A	orf19.5989	78.864	86.1963	81.3232	80.4517	-0.0290056	0.97387	Putative cleavage factor I subunit; required for the cleavage and polyadenylation of pre-mRNA 3' ends; Spider biofilm repressed
C3_05160C_A	orf19.5991	115.569	90.6749	120.289	205.908	0.661396	0.19615	Ortholog(s) have role in assembly of large subunit precursor of preribosome, maturation of 5.8S rRNA from tricistronic rRNA transcript (SSU-rRNA, 5.8S rRNA and LSU-rRNA), more
C3_05250C_A	orf19.6003	87.3111	92.811	111.283	132.336	0.435646	0.437448	Protein of unknown function; role in intracellular signal transduction; Spider biofilm induced
C3_05280C_A	orf19.6007	46.627	54.4775	55.8997	93.6645	0.564917	0.247329	Predicted fatty acid acyl transferase-related protein domain; repressed by prostaglandins
C3_05290C_A	orf19.6008	31.6828	36.3281	45.6915	28.1022	0.117733	0.880593	S. cerevisiae ortholog YLL032C interacts with ribosomes; repressed by alpha pheromone in SpiderM medium
C3_05300C_A	orf19.6966	8.50477	11.241	8.58686	11.4504	0.0211394	0.98238	Ortholog(s) have choline kinase activity, ethanolamine kinase activity and role in phosphatidylcholine biosynthetic process, phosphatidylethanolamine biosynthetic process
C3_05320W_A	orf19.6968	120.933	101.989	97.4838	168.319	0.253813	0.717805	Protein of unknown function; Hog1-repressed; Spider biofilm induced
C3_05330C_A	orf19.6970	3.53426	3.54011	4.12416	2.48262	-0.0986548	0.951835	Ortholog of C. dubliniensis CD36 : Cd36_85310, C. parapsilosis CDC317 : CPAR2_807370, Candida tenuis NRRL Y-1498 : CANTEDRAFT_115544 and Debaryomyces hansenii CBS767 : DEHA2D11770g
C3_05360C_A	orf19.6973	55.2512	56.6531	84.7613	91.9329	0.658989	0.202958	ATP-dependent LON protease family member; Hap43-repressed gene; regulated by Gcn2 and Gcn4; Spider biofilm induced
C3_05380W_A	orf19.6976	12.4632	11.937	16.5177	24.3259	0.743216	0.116752	Predicted MFS membrane transporter; member of the proton coupled folate transporter/heme carrier protein family; virulence-group-correlated expression; Spider biofilm induced
C3_05400C_A	orf19.6978	34.254	18.047	25.5569	60.5765	0.719735	0.66285	Planktonic growth-induced gene
C3_05410W_A	orf19.6979	49.8156	45.607	40.6534	37.2112	-0.293363	0.630062	Ortholog(s) have role in cellular manganese ion homeostasis, mitochondrion organization
C3_05420W_A	orf19.6980	12.6053	17.1577	18.0511	23.3099	0.474749	0.380715	Ortholog(s) have cell periphery, cellular bud neck localization
C3_05430W_A	orf19.6981	10.5787	10.4957	21.5367	22.9286	1.07719	0.0141975	Ortholog of S. cerevisiae : YKR051W, C. glabrata CBS138 : CAGL0K08228g, C. dubliniensis CD36 : Cd36_85420, C. parapsilosis CDC317 : CPAR2_405720 and Candida tenuis NRRL Y-1498 : CANTEDRAFT_124861
C3_05440C_A	orf19.6982	10.975	12.4207	20.3315	31.6883	1.15282	0.0200408	Ortholog(s) have ribosome binding activity and role in mitochondrial translational initiation
C3_05450C_A	orf19.6983	415.531	337.115	297.72	657.568	0.343965	0.595296	Protein of unknown function; Hap43-repressed gene; repressed by nitric oxide; Spider biofilm induced
C3_05460W_A	orf19.6984	22.9212	23.018	34.2418	60.8515	1.04961	0.0141975	Ortholog of C. dubliniensis CD36 : Cd36_85460, C. parapsilosis CDC317 : CPAR2_405760, Candida tenuis NRRL Y-1498 : CANTEDRAFT_116052 and Debaryomyces hansenii CBS767 : DEHA2D16940g
C3_05510W_A	orf19.6986	3.1797	6.36538	7.31482	7.46796	0.631088	0.303135	Has domain(s) with predicted intracellular localization
C3_05540C_A	orf19.6989	30.0352	17.17	26.0036	36.0028	0.39347	0.927819	Putative U2 snRNP-associated protein; Spider biofilm induced
C3_05550C_A	orf19.6990	38.1355	35.3917	30.1667	31.2927	-0.258644	0.708599	Putative peptidyl-prolyl cis-trans isomerase; predicted endoplasmic reticulum (ER) localization
C3_05640W_A	orf19.6999	1.42841	1.26568	0.168513	0.532561	-1.94216	0.271059	Predicted oxidoreductase; rat catheter biofilm repressed
C3_05660C_A	orf19.7002	0	0	0.183928	0	inf	1	Ortholog of C. parapsilosis CDC317 : CPAR2_806990, Candida tenuis NRRL Y-1498 : CANTEDRAFT_122709, Debaryomyces hansenii CBS767 : DEHA2E00110g and Pichia stipitis Pignal : PICST_30109
C3_05670C_A	orf19.7348	29.7539	43.9405	56.2795	22.4331	0.0950414	0.973534	Ortholog of Candida albicans WO-1 : CAWG_02878
C3_05680W_A	orf19.7347	49.3994	39.2163	37.5378	56.1564	0.0803987	0.934788	Ortholog(s) have ubiquitin-protein transferase activity, role in protein monoubiquitination, protein polyubiquitination, ubiquitin-dependent ERAD pathway and endoplasmic reticulum membrane localization
C3_05750C_A	orf19.7356	26.2599	21.6636	45.8285	76.8059	1.35556	0.0615225	Ortholog of C. parapsilosis CDC317 : CPAR2_807080, C. dubliniensis CD36 : Cd36_85690, Candida orthopsilosis Co 90-125 : CORT_0C02090 and Candida albicans WO-1 : CAWG_02885
C3_05760W_A	orf19.7357	36.9575	48.3766	95.3252	135.024	1.43263	0.000848373	Ortholog(s) have phosphopantothenate--cysteine ligase activity, role in acetyl-CoA biosynthetic process from pantothenate, coenzyme A biosynthetic process and CoA-synthesizing protein complex, cytoplasm, nucleus localization
C3_05790C_A	orf19.7360	10.247	20.5138	23.4181	36.849	0.970277	0.415472	Ortholog(s) have enzyme activator activity, role in histone deubiquitination, regulation of transcription by RNA polymerase II and DUBm complex, SAGA complex localization
C3_05800W_A	orf19.7361	27.972	30.4654	34.4832	73.4373	0.885006	0.0481495	Ortholog(s) have tRNA-intron endonuclease activity, role in tRNA-type intron splice site recognition and cleavage and mitochondrial outer membrane, tRNA-intron endonuclease complex localization
C3_05840W_A	orf19.7364	0.922571	0.743155	3.79451	1.49053	1.66576	0.134553	Has domain(s) with predicted N,N-dimethylaniline monooxygenase activity, NADP binding, flavin adenine dinucleotide binding activity and role in oxidation-reduction process
C3_05850W_A	orf19.7365	7.71119	8.00601	12.3041	8.62018	0.412833	0.532364	Ortholog(s) have ubiquitin-protein transferase activity and role in negative regulation of apoptotic process, negative regulation of gluconeogenesis, proteasome-mediated ubiquitin-dependent protein catabolic process
C3_05860C_A	orf19.7366	40.4376	37.0496	33.118	75.6649	0.489422	0.364566	Ortholog(s) have rRNA (uridine-N3-)-methyltransferase activity, role in rRNA base methylation and nucleolus localization
C3_05880C_A	orf19.7368	125.908	136.978	96.754	74.4536	-0.618691	0.203344	Ortholog(s) have mRNA binding, poly(U) RNA binding activity and role in nuclear-transcribed mRNA catabolic process, nonsense-mediated decay, regulation of mRNA stability, stress granule assembly
C3_05900W_A	orf19.7370	183.129	133.88	81.9257	152.267	-0.436828	0.439875	Possible G-protein coupled receptor; vacuolar membrane transporter for cationic amino acids; PQ-loop motif; rat catheter and Spider biofilm induced
C3_05940C_A	orf19.7375	30.1536	29.263	20.2597	18.5588	-0.614123	0.333416	Putative U1A component of the U1 snRNP, involved in splicing; contains two RNA recognition motifs (RRMs); ortholog of S. cerevisiae MUD1
C3_05950W_A	orf19.7376	8.71573	13.8911	13.2801	18.9275	0.510644	0.331054	Ortholog of C. dubliniensis CD36 : Cd36_85880, C. parapsilosis CDC317 : CPAR2_806870, Candida tenuis NRRL Y-1498 : CANTEDRAFT_96983 and Debaryomyces hansenii CBS767 : DEHA2D16148g
C3_05970C_A	orf19.7378	43.7613	39.22	65.3854	60.5147	0.601422	0.184629	Putative phosphopantothenoylcysteine decarboxylase, binds to protein phosphatase Ppz1p and regulates its activity
C3_05990C_A	orf19.7380	14.3357	14.6011	14.592	11.086	-0.172371	0.803014	Has domain(s) with predicted nucleic acid binding, nucleotide binding activity
C3_06040W_A	orf19.7385	2.3565	3.61392	12.9271	5.63759	1.63666	0.0122951	CCCH zinc finger protein; Spider biofilm induced
C3_06050C_A	orf19.7386	80.2581	83.4084	67.0653	85.4041	-0.102239	0.892415	Ortholog(s) have ribosome binding activity
C3_06110C_A	orf19.7393	89.2336	78.5369	91.4652	94.4172	0.147901	0.84878	Predicted NAD+/NADH kinase; possible role in cellular iron ion homeostasis; Spider biofilm induced
C3_06130W_A	orf19.7395	10.157	0	5.45204	13.1279	0.871272	0.648357	Ortholog of Candida albicans WO-1 : CAWG_02922
C3_06140W_A	orf19.7396	19.0793	13.462	10.2955	15.7931	-0.318855	0.660393	Protein of unknown function; Spider biofilm induced; Hap43-repressed
C3_06150W_A	orf19.7397	19.2048	20.4954	27.2695	32.5822	0.592247	0.190651	Ortholog(s) have role in negative regulation of transcription by RNA polymerase II, positive regulation of transcription by RNA polymerase II, regulation of fungal-type cell wall organization and nuclear chromatin, nucleolus localization
C3_06160C_A	orf19.7397.1	0	0	0.155499	0.16381	inf	1	Predicted ORF identical to NSA2
C3_06170C_A	orf19.7397.3	0	0	0	0	0	1	Predicted ORF identical to orf19.7420
C3_06240C_A	orf19.7409.1	163.029	177.561	164.082	126.209	-0.230537	0.818645	Ortholog(s) have structural constituent of ribosome activity and mitochondrial large ribosomal subunit localization
C3_06260C_A	orf19.7406	26.5618	27.252	25.2897	26.3848	-0.0585223	0.965602	Ortholog of C. dubliniensis CD36 : Cd36_86220, C. parapsilosis CDC317 : CPAR2_404490, Candida tenuis NRRL Y-1498 : CANTEDRAFT_94473 and Debaryomyces hansenii CBS767 : DEHA2D01804g
C3_06270C_A	orf19.7405	37.221	38.1992	46.2452	32.922	0.0699533	0.938388	Ortholog of Rad33; involved in nucleotide excision repair in S. cerevisiae; induced by Mnl1 under weak acid stress
C3_06280W_A	orf19.7404	67.542	57.743	91.1783	66.073	0.327857	0.56957	Catabolic L-serine (L-threonine) deaminase;, catalyzes degradation of L-serine and L-threonine; required to use serine or threonine as a sole nitrogen source; Spider biofilm repressed
C3_06290W_A	orf19.7403	45.0846	45.044	59.7514	52.4464	0.315987	0.587927	Ortholog of S. cerevisiae : YML020W, C. glabrata CBS138 : CAGL0G07062g, C. dubliniensis CD36 : Cd36_86190, C. parapsilosis CDC317 : CPAR2_404740 and Candida tenuis NRRL Y-1498 : CANTEDRAFT_107670
C3_06350W_A	orf19.7420	3.0107	2.48987	4.15562	3.24276	0.427631	0.780787	Ortholog(s) have RNA polymerase II transcription coactivator activity involved in preinitiation complex assembly activity
C3_06370C_A	orf19.7422	81.9614	63.9913	80.6871	118.35	0.447539	0.387874	Ortholog(s) have role in endonucleolytic cleavage in 5'-ETS of tricistronic rRNA transcript (SSU-rRNA, 5.8S rRNA and LSU-rRNA), more
C3_06400C_A	orf19.7425	29.3663	27.8363	29.3268	18.0952	-0.270521	0.681496	Ortholog(s) have uracil DNA N-glycosylase activity, role in DNA repair and mitochondrion, nucleus localization
C3_06410C_A	orf19.7426	18.0117	37.1543	22.5408	22.4652	-0.293659	0.655873	Ortholog(s) have protein disulfide oxidoreductase activity, role in cellular protein-containing complex assembly, protein N-linked glycosylation via asparagine and oligosaccharyltransferase complex localization
C3_06420C_A	orf19.7427	127.464	112.116	102.934	189.81	0.289132	0.651937	Has domain(s) with predicted integral component of membrane localization
C3_06440W_A	orf19.7433	140.086	111.464	124.788	125.696	-0.00612453	0.994196	Ortholog(s) have structural constituent of nuclear pore activity
C3_06490W_A	orf19.7437	30.6511	29.4831	35.0675	25.8195	0.0179505	0.983943	Putative protein of unknown function; Hap43p-repressed gene; ortholog of S. cerevisiae YJL218W
C3_06520C_A	orf19.7441	26.7696	31.6748	49.066	59.0726	0.887743	0.0467237	Ortholog(s) have role in lipid homeostasis, nuclear envelope organization and nuclear envelope localization
C3_06530W_A	orf19.7442	10.5584	25.3506	24.8117	24.6246	0.461225	0.464261	Ortholog of C. dubliniensis CD36 : Cd36_86500, C. parapsilosis CDC317 : CPAR2_206120, Candida tenuis NRRL Y-1498 : CANTEDRAFT_100862 and Debaryomyces hansenii CBS767 : DEHA2F17270g
C3_06540C_A	orf19.7443	18.4145	20.025	11.0719	17.9181	-0.407033	0.59476	Ortholog of C. dubliniensis CD36 : Cd36_86510, C. parapsilosis CDC317 : CPAR2_206110, Candida tenuis NRRL Y-1498 : CANTEDRAFT_112184 and Debaryomyces hansenii CBS767 : DEHA2F17292g
C3_06550C_A	orf19.7444	11.9161	11.3219	8.80728	6.72657	-0.581068	0.401664	Ortholog(s) have transcription factor TFIIH holo complex localization
C3_06560W_A	orf19.7445	294.648	172.317	179.148	220.87	-0.22325	0.753407	Ortholog of S.c. Vid24; a peripheral membrane protein located at Vid (vacuole import and degradation) vesicles; regulated by Sef1, Sfu1, and Hap43; Spider biofilm induced
C3_06600C_A	orf19.7449	10.1058	11.572	12.8759	14.5688	0.34031	0.597084	Ortholog(s) have role in mitochondrial genome maintenance, plasmid maintenance
C3_06610W_A	orf19.7450	64.5872	59.2312	50.4442	34.5681	-0.542481	0.275601	Ortholog(s) have protein binding, bridging activity, role in septin ring assembly and cellular bud neck septin ring localization
C3_06630W_A	orf19.7452	6.82026	6.46006	7.39406	6.93434	0.109588	0.905475	Ortholog(s) have chromatin binding activity and role in DNA replication initiation, DNA unwinding involved in DNA replication, double-strand break repair via break-induced replication
C3_06640W_A	orf19.7453	12.6039	21.8284	16.8405	18.8204	0.0505813	0.961416	Ortholog of Candida albicans WO-1 : CAWG_02974
C3_06660C_A	orf19.7455	0.404148	0.954953	14.6691	5.87656	3.91811	0.0138325	Ortholog of C. dubliniensis CD36 : Cd36_86630 and Candida tropicalis MYA-3404 : CTRG_05698
C3_06670C_A	orf19.7456	14.5287	20.4034	21.0207	11.1829	-0.117334	0.89727	Protein of unknown function; flow model biofilm repressed
C3_06680C_A	orf19.7457	29.634	12.8987	24.5845	27.0185	0.278884	0.692549	Protein with Mob2p-dependent hyphal regulation
C3_06690C_A	orf19.7458	74.8823	77.3029	86.4112	54.6179	-0.109836	0.910278	Ortholog of C. dubliniensis CD36 : Cd36_86660, Candida tenuis NRRL Y-1498 : cten_CGOB_00028, Candida tropicalis MYA-3404 : CTRG_05695 and Candida albicans WO-1 : CAWG_02979
C3_06700C_A	orf19.7459	323.61	239.187	651.924	658.428	1.21927	0.00862192	Putative mitochondrial protein with a predicted role in respiratory growth; fluconazole-induced; ketoconazole-repressed; mutants display a strong defect in flow model biofilm formation; Spider biofilm induced
C3_06710W_A	orf19.6832	31.6127	37.7188	39.7782	27.7229	-0.0386004	0.966919	Protein of unknown function; regulated by Sef1p-, Sfu1p-, and Hap43p
C3_06730W_A	orf19.6830	55.0358	50.3505	39.4604	30.0135	-0.601144	0.227543	Putative enoyl-CoA hydratase; Spider biofilm induced
C3_06740W_A	orf19.6829	40.8756	41.7409	41.981	69.0709	0.426731	0.437367	Protein with a predicted mitochondrial ATPase expression domain; possibly an essential gene, disruptants not obtained by UAU1 method
C3_06750W_A	orf19.6828.1	1041.73	986.145	557.455	650.819	-0.747024	0.11347	Ortholog(s) have P-P-bond-hydrolysis-driven protein transmembrane transporter activity, protein transporter activity, structural molecule activity
C3_06760W_A	orf19.6828	181.566	118.985	100.651	259.883	0.262523	0.688079	Ortholog(s) have role in rRNA processing and preribosome, large subunit precursor localization
C3_06800C_A	orf19.6822	11.4503	11.1149	12.2025	15.6985	0.306217	0.773245	Ortholog(s) have NEDD8 transferase activity, cullin family protein binding, protein binding, bridging, ubiquitin binding, ubiquitin conjugating enzyme binding activity
C3_06810W_A	orf19.6821	9.674	10.7856	12.8393	10.6058	0.196509	0.781344	Ortholog(s) have ubiquitin protein ligase activity and role in anaphase-promoting complex-dependent catabolic process, exit from mitosis, metaphase/anaphase transition of mitotic cell cycle, protein ubiquitination
C3_06830C_A	orf19.6818	45.4004	38.463	43.4251	81.2018	0.571503	0.277702	Has domain(s) with predicted ATP binding, ATP-dependent helicase activity, helicase activity, nucleic acid binding activity
C3_06860C_A	orf19.6816	53.9768	55.6098	30.4468	16.4066	-1.22585	0.00818221	Putative xylose and arabinose reductase; flow model biofilm induced; Spider biofilm repressed
C3_06880W_A	orf19.6813	3.73726	5.40299	4.37415	2.86011	-0.337388	0.815531	Protein of unknown function; Hap43-induced gene
C3_06920W_A	orf19.6809	39.1836	37.5903	44.2424	26.6682	-0.114614	0.884609	Putative phosphomutase-like protein; protein present in exponential and stationary growth phase yeast; Hap43-repressed; Spider biofilm repressed
C3_06940W_A	orf19.6807	250.668	266.611	140.518	122.351	-0.976593	0.0350429	Predicted ORF in retrotransposon Tca17 with similarity to parts of the Gag-Pol region of retrotransposons; clade-associated gene expression
C3_06950W_A	orf19.6805	82.9327	94.6113	89.2118	105.261	0.131389	0.867963	Protein of unknown function; Spider biofilm induced
C3_06970W_A	orf19.6804	28.0232	32.849	23.3915	50.5216	0.280047	0.654783	Ortholog(s) have role in SRP-dependent cotranslational protein targeting to membrane, translocation and signal recognition particle, endoplasmic reticulum targeting localization
C3_06990W_A	orf19.6802	5.83707	5.84673	7.97898	4.71525	0.119663	0.918288	Ortholog(s) have palmitoyltransferase activity, role in protein palmitoylation, vacuole fusion, non-autophagic and fungal-type vacuole membrane localization
C3_07030C_A	orf19.6797	9.69387	12.6819	14.1665	19.8025	0.602279	0.214087	Ortholog of C. dubliniensis CD36 : Cd36_86960, C. parapsilosis CDC317 : CPAR2_808800, Candida tenuis NRRL Y-1498 : CANTEDRAFT_113621 and Debaryomyces hansenii CBS767 : DEHA2F02486g
C3_07050W_A	orf19.6795	29.4199	32.7526	25.4522	33.5158	-0.0763439	0.954325	Ortholog(s) have enzyme activator activity
C3_07070C_A	orf19.6793	64.4176	64.7988	73.0833	92.2382	0.355485	0.511836	Protein of unknown function; Sef1, Sfu1, and Hap43 regulated; rat catheter and Spider biofilm induced
C3_07100C_A	orf19.6790	19.1871	21.5917	19.6053	19.607	-0.0565143	0.949488	Ortholog(s) have mRNA binding activity, role in 3'-UTR-mediated mRNA destabilization, mitochondrion organization and P-body, cytoplasmic stress granule, perinuclear region of cytoplasm localization
C3_07110W_A	orf19.6789	11.3928	10.0658	5.26191	8.35451	-0.65621	0.175292	S. cerevisiae ortholog Nud1 is a spindle pole body outer plaque component; it acts through the mitotic exit network to specify asymmetric spindle pole body inheritance; Hap43-induced gene
C3_07120W_A	orf19.6788	17.2391	12.3377	12.033	11.962	-0.301728	0.739674	Protein with a predicted role in cotranslational protein targeting to membrane; induced during chlamydospore formation in both C. albicans and C. dubliniensis
C3_07130W_A	orf19.6787	181.569	178.318	146.991	227.503	0.0573974	0.947832	Ortholog(s) have cargo receptor activity, role in ER to Golgi vesicle-mediated transport, ascospore formation, axial cellular bud site selection and COPII-coated ER to Golgi transport vesicle, endoplasmic reticulum membrane localization
C3_07140C_A	orf19.6786	11.9547	11.0712	7.5703	10.9032	-0.317798	0.643346	Protein of unknown function; flow model biofilm induced
C3_07170C_A	orf19.6783	73.1893	78.6656	95.7398	172.943	0.82321	0.092965	Putative geranylgeranyltransferase regulatory component
C3_07230W_A	orf19.6778	32.113	46.145	35.6739	40.0403	-0.0476749	0.957365	Aminophospholipid translocase (flippase); maintains membrane lipid asymmetry in post-Golgi secretory vesicles; contributes to clathrin-coated vesicle formation and endocytosis; flow model biofilm repressed
C3_07240W_A	orf19.6777	2.14589	2.11269	5.30223	6.54867	1.47655	0.188713	Ortholog of Candida albicans WO-1 : CAWG_03032
C3_07280C_A	orf19.6770	101.401	72.3517	122.945	134.833	0.569095	0.237901	protein with ENTH Epsin domain, N-terminal; Spider biofilm repressed
C3_07290W_A	orf19.6769	222.126	161.968	306.643	408.957	0.897695	0.0663938	Has domain(s) with predicted intracellular localization
C3_07330W_A	orf19.6758	26.0487	34.8573	12.9089	14.1714	-1.16934	0.02593	Predcted glucose 1-dehydrogenase (NADP+); rat catheter biofilm repressed
C3_07350W_A	orf19.6756	49.2587	56.6806	48.7899	38.4101	-0.280839	0.642781	Ortholog(s) have Rab GTPase binding activity and Golgi apparatus localization
C3_07370W_A	orf19.6754	173.926	149.686	315.589	354.402	1.04988	0.0145614	Protein of unknown function; Spider biofilm induced
C3_07380W_A	orf19.6753	54.7673	61.0785	77.2357	57.7175	0.220254	0.750972	Protein with a predicted RING-type zinc finger; possibly an essential gene, disruptants not obtained by UAU1 method
C3_07390C_A	orf19.6752	140.403	130.462	102.968	148.434	-0.107575	0.889534	Ortholog(s) have structural constituent of ribosome activity and mitochondrial small ribosomal subunit localization
C3_07400W_A	orf19.6751	89.6435	85.1379	75.5482	96.7408	-0.0207209	0.980642	Ortholog(s) have tRNA methyltransferase activity, role in cytoplasmic translation, tRNA methylation and cytoplasm localization
C3_07420W_A	orf19.6748	210.103	202.461	166.197	265.543	0.0655472	0.939999	Ortholog(s) have eukaryotic 43S preinitiation complex, eukaryotic translation initiation factor 3 complex localization
C3_07430W_A	orf19.6747	35.5995	51.4209	54.0985	53.7072	0.309008	0.608822	Ortholog(s) have acid phosphatase activity and role in dephosphorylation, intracellular sterol transport
C3_07450C_A	orf19.6744	19.6689	32.6779	26.9838	6.82721	-0.630611	0.297793	Has domain(s) with predicted endodeoxyribonuclease activity, producing 5'-phosphomonoesters activity
C3_07460W_A	orf19.6742	31.0295	35.3999	32.7009	28.3749	-0.121222	0.875072	Ortholog(s) have RNA polymerase II CTD heptapeptide repeat phosphatase activity, role in dephosphorylation of RNA polymerase II C-terminal domain and cytosol, nucleus localization
C3_07470W_A	orf19.6741	41.4839	31.4496	9.36124	6.30046	-2.21934	0.000848373	Putative plasma membrane protein; predicted role in cell wall integrity; regulated by Nrg1, Tup1; induced during chlamydospore formation in both C. albicans and C. dubliniensis
C3_07480W_A	orf19.6740	26.5699	28.785	27.4577	36.9741	0.219064	0.740323	Ortholog(s) have ubiquitin-protein transferase activity and role in generation of catalytic spliceosome for first transesterification step
C3_07490W_A	orf19.6739	54.6672	57.5179	71.3687	55.5627	0.178168	0.796908	Ortholog(s) have phosphopentomutase activity and role in guanosine catabolic process, inosine catabolic process, purine ribonucleoside salvage
C3_07540C_A	orf19.6737	26.3446	30.9142	20.2017	11.9349	-0.833282	0.111322	Protein of unknown function; mutants are viable; induced in a cyr1, ras1, or efg1 homozygous null
C3_07550C_A	orf19.6736	61.5914	55.071	62.1502	94.0242	0.420818	0.443764	Protein required for mitochondrial ribosome small subunit biogenesis; role in maturation of SSU-rRNA; Spider biofilm induced
C3_07570C_A	orf19.6732	23.3185	22.8702	18.8367	21.8566	-0.182748	0.823336	Ortholog(s) have thiamine phosphate phosphatase activity and role in phosphate ion transport
C3_07580W_A	orf19.6731.1	578.062	586.993	219.804	237.985	-1.34764	0.00156339	Ortholog of C. dubliniensis CD36 : Cd36_87460, C. parapsilosis CDC317 : CPAR2_808260, Debaryomyces hansenii CBS767 : DEHA2F07084g and Pichia stipitis Pignal : psti_CGOB_00185
C3_07590W_A	orf19.6731	409.293	284.837	181.231	162.39	-1.01439	0.0187395	Protein of unknown function; repressed by alpha pheromone in SpiderM medium; Spider biofilm induced
C3_07600W_A	orf19.6730	99.5439	75.5698	77.5476	117.739	0.157305	0.827024	Ortholog of S. cerevisiae : YCR016W, C. glabrata CBS138 : CAGL0L07832g, C. dubliniensis CD36 : Cd36_87480, C. parapsilosis CDC317 : CPAR2_808240 and Candida tenuis NRRL Y-1498 : CANTEDRAFT_96280
C3_07630C_A	orf19.6726	63.2371	69.9756	94.1379	85.1394	0.428461	0.4064	Ortholog(s) have DNA secondary structure binding activity and role in RNA polyadenylation, chromatin organization, negative regulation of transcription by RNA polymerase II, transcription elongation from RNA polymerase II promoter
C3_07650C_A	orf19.6723	29.3426	25.9998	22.7704	38.6528	0.150398	0.835477	Protein of unknown function; Spider biofilm induced
C3_07660W_A	orf19.6722	23.1594	19.5981	28.706	38.9511	0.662063	0.155398	Protein similar to S. cerevisiae Rad4p; down-regulation associated with azole resistance
C3_07670W_A	orf19.6720	759.997	458.422	357.963	511.316	-0.487121	0.400125	P-Loop domain-containing protein of unknown function; transposon mutation affects filamentous growth; Spider biofilm induced
C3_07680W_A	orf19.6719	22.5828	25.613	24.323	24.0803	0.006199	0.992935	Putative nucleosome assembly protein; homozygous transposon insertion causes decreased colony wrinkling under filamentous growth-inducing conditions, but does not block true hyphal formation in liquid media
C3_07690C_A	orf19.6718	110.497	85.7179	64.6203	89.4342	-0.348993	0.537465	Has domain(s) with predicted sequence-specific DNA binding activity
C3_07700W_A	orf19.6717	111.053	98.9466	78.0881	100.634	-0.23267	0.718984	Putative serine hydrolase; Spider biofilm repressed
C3_07720C_A	orf19.6715	1.09389	1.93855	0	1.76732	-0.77892	0.665833	Ortholog of Candida albicans WO-1 : CAWG_03078
C3_07740W_A	orf19.6712	56.5057	59.6223	48.7399	41.9362	-0.356922	0.526576	Ortholog of S. cerevisiae : SGM1, C. glabrata CBS138 : CAGL0M00462g, C. dubliniensis CD36 : Cd36_87610, C. parapsilosis CDC317 : CPAR2_808090 and Candida tenuis NRRL Y-1498 : cten_CGOB_00177
C3_07760C_A	orf19.6709	54.845	67.978	60.7066	32.1734	-0.40314	0.898307	Predicted alpha/beta hydrolase; Spider biofilm induced
C3_07770C_A	orf19.6170	44.2347	40.2426	29.6479	27.8228	-0.555737	0.270041	Ortholog(s) have microtubule plus-end binding, protein homodimerization activity
C3_07800C_A	orf19.6175	137.981	103.587	151.277	212.71	0.591456	0.216604	Putative 35S rRNA processing protein; Hap43-induced; repressed by prostaglandins; Spider biofilm induced
C3_07820W_A	orf19.6177	337.093	363.295	228.721	165.22	-0.830174	0.0621842	Protein of unknown function; Spider biofilm repressed
C3_07840C_A	orf19.6179	308.561	446.633	96.434	76.5546	-2.12617	0.02593	Ortholog of Candida albicans WO-1 : CAWG_03090
C3_07850W_A	orf19.6180	36.8842	40.5222	38.2565	24.2841	-0.307658	0.783978	Protein similar to Pichia anomala YDL054c and S. cerevisiae Ydl054cp; transmembrane regions predicted; Hap43p-repressed gene
C3_07870W_A	orf19.6181	32.7102	30.1117	38.4341	29.535	0.113612	0.840834	Ortholog of Candida albicans WO-1 : CAWG_03093
C3_07880C_A	orf19.6184	24.0731	25.0225	28.3997	18.6986	-0.0599177	0.9612	Protein of unknown function; Spider biofilm repressed
C3_07900C_A	orf19.6186	56.7211	41.8315	78.2843	85.0454	0.728822	0.593382	Predicted protein of unknown function; overlaps orf19.6185
C3_07910W_A	orf19.6185	6.49005	6.04564	6.28457	7.76091	0.164064	0.976042	Putative pseudouridine-5'-phosphate glycosidase; overlaps orf19.6186 and orf19.6187; Spider biofilm repressed
C3_07920W_A	orf19.6187	70.811	60.3118	64.8702	54.6235	-0.133984	0.915456	possible pseudouridine monophosphate glycosidase; overlaps orf19.6185 and orf19.618; has intron; Spider biofilm repressed
C3_07930C_A	orf19.6188	43.5349	77.824	31.9449	47.5534	-0.610282	0.923881	Putative adhesin-like protein
C3_07940W_A	orf19.6189	106.027	102.196	102.582	87.5272	-0.131307	0.946202	Chalcone related protein family; flow model biofilm induced
C3_07980C_A	orf19.6192	47.688	48.0654	96.9061	68.8597	0.79175	0.147025	Protein of unknown function; Plc1-regulated; transcript detected in high-resolution tiling arrays
C4_00020W_A	orf19.364	174.288	199.336	177.447	103.587	-0.410849	0.468498	Putative vacuolar H+-ATPase subunit; required for proper vacuolar ATPase assembly and vacuolar functions; Spider biofilm repressed
C4_00030C_A	orf19.366	46.7956	44.1857	58.9844	49.0245	0.247507	0.699466	Ortholog(s) have double-stranded DNA binding activity, role in DNA damage checkpoint, double-strand break repair, reciprocal meiotic recombination and checkpoint clamp complex localization
C4_00050W_A	orf19.371	29.0926	32.4256	53.0363	48.3329	0.720535	0.129843	Ortholog of C. dubliniensis CD36 : Cd36_40110, C. parapsilosis CDC317 : CPAR2_402300, Candida tenuis NRRL Y-1498 : CANTEDRAFT_94507 and Debaryomyces hansenii CBS767 : DEHA2F05588g
C4_00060W_A	orf19.372	54.8257	62.6458	86.796	87.837	0.572016	0.824191	Putative protein of unknown function; Hap43p-repressed gene
C4_00070C_A	orf19.374	149.551	194.341	144.835	125.095	-0.349372	0.59583	Ortholog(s) have role in protein transport to vacuole involved in ubiquitin-dependent protein catabolic process via the multivesicular body sorting pathway
C4_00080C_A	orf19.376	158.701	167.765	73.8498	130.392	-0.676654	0.166013	Protein of unknown function; Hap43-repressed; Spider biofilm induced
C4_00100C_A	orf19.5633	102.628	87.6167	87.3912	136.262	0.233407	0.848695	F-box domain-containing protein; flow model biofilm induced
C4_00170W_A	orf19.5642	934.268	986.727	789.7	504.049	-0.570296	0.279916	Ortholog of S. cerevisiae Dif1; which regulates nuclear localization of Rnr2 and Rnr4; colony morphology-related gene regulation by Ssn6; induced in cyr1 mutant; Spider biofilm induced
C4_00190W_A	orf19.5644	9.42137	7.76224	10.6467	6.409	-0.0107805	0.940694	Ortholog(s) have role in spore membrane bending pathway and cytoplasm, prospore membrane localization
C4_00210W_A	orf19.5646	10.137	11.7624	5.92254	4.67932	-1.04658	0.203227	Ortholog of S. cerevisiae : YPL034W, C. dubliniensis CD36 : Cd36_40280, C. parapsilosis CDC317 : CPAR2_402170 and Candida tenuis NRRL Y-1498 : CANTEDRAFT_137348
C4_00230W_A	orf19.5648	49.5435	64.8162	47.6007	32.0174	-0.52241	0.353902	Ortholog of C. dubliniensis CD36 : Cd36_40300, C. parapsilosis CDC317 : CPAR2_402190, Candida tenuis NRRL Y-1498 : cten_CGOB_00197 and Debaryomyces hansenii CBS767 : DEHA2F06160g
C4_00250W_A	orf19.5649	395.101	305.532	60.512	33.2669	-2.90132	0.0755426	Ortholog of Candida lusitaniae ATCC 42720 : CLUG_00275 and Candida albicans WO-1 : CAWG_03759
C4_00260W_A	orf19.5651	56.303	55.68	119.684	88.0581	0.891514	0.0450317	Ortholog(s) have histone demethylase activity (H3-dimethyl-K4 specific), histone demethylase activity (H3-monomethyl-K4 specific), histone demethylase activity (H3-trimethyl-K4 specific) activity
C4_00290C_A	orf19.5655	3.42984	2.46928	4.52046	2.85725	0.322674	0.783978	Has domain(s) with predicted 2 iron, 2 sulfur cluster binding, iron ion binding, oxidoreductase activity, oxidoreductase activity and acting on paired donors, more
C4_00320C_A	orf19.5660	27.2858	30.7038	30.0373	19.3373	-0.232025	0.747322	Ortholog(s) have ubiquitin-protein transferase activity, role in protein import into peroxisome matrix, protein polyubiquitination and integral component of peroxisomal membrane, peroxisomal importomer complex localization
C4_00330C_A	orf19.5660.1	1478.59	1556.5	1256.57	1130.9	-0.346257	0.542606	Ortholog(s) have proton-transporting ATP synthase activity, rotational mechanism, structural molecule activity and role in ATP synthesis coupled proton transport, cristae formation, protein complex oligomerization
C4_00380W_A	orf19.5665	39.3378	49.067	36.0822	33.4886	-0.345643	0.53489	Ortholog(s) have D-arabinose 1-dehydrogenase [NAD(P)+] activity and role in dehydro-D-arabinono-1,4-lactone biosynthetic process
C4_00390W_A	orf19.5666	194.268	205.239	156.609	130.776	-0.475237	0.339638	Ortholog(s) have chromatin binding, transcription coactivator activity
C4_00410W_A	orf19.5669	259.544	343.94	127.021	129.804	-1.23253	0.000848373	Protein with B-cell receptor-associated protein 31-like domain; membrane-localized protein
C4_00420C_A	orf19.5671	69.8387	69.4247	81.8919	66.5381	0.0919669	0.909839	Ortholog(s) have enzyme inhibitor activity and role in actin cortical patch assembly, negative regulation of catalytic activity, septin cytoskeleton organization
C4_00460C_A	orf19.5675	62.5532	49.9719	68.8911	98.3607	0.571776	0.280914	Protein involved in proteolytic control of sumoylated substrates; interacts with SUMO; member of the SWI/SNF family of DNA-dependent ATPases; Spider biofilm induced
C4_00470C_A	orf19.5676	36.4726	35.5039	42.0366	50.4487	0.361698	0.509493	Has domain(s) with predicted zinc ion binding activity
[truncated: 4,242 more rows]

## Sheet: DEG 2.0 fold cut-off
Functional categories of differentially expressed genes.
[truncated: 687 more rows]

## Sheet: DEG 1.5 fold cut-off
Differentially expressed genes (1.5 fold cut-off).
[truncated: 829 more rows]
