# Supplementary material for: Environment-induced same-sex mating in the yeast Candida albicans through the Hsf1–Hsp90 pathway
Source: PLoS Biol. 2019 Mar 13;17(3):e2006966. doi: 10.1371/journal.pbio.2006966 (PMC6415874; doi:10.1371/journal.pbio.2006966)
Supplement: S2 Data — Hsp90, Heat shock protein 90; YPD-K, yeast extract-peptone-glucose-K2HPO4; YP-K, yeast extract-peptone-K2HPO4 (XLSX) [file pbio.2006966.s011.xlsx]

## Sheet: All HSP90 genetic interactors 
Expression profile of Hsp90 genetic interaction genes on YP-K and YPD-K media
Gene	ORF_assembly22	ORF_assembly19	FPKM of YP-K_1	FPKM of YP-K_2	FPKM of YPD-K_1	FPKM of YPD-K_2	Log2(YPD-K/YP-K)	FDR adjusted p-value	Functional description
RBE1	orf19.7218	orf19.7218	1428.95	1439.08	234.973	227.437	-2.63282	0.000848373	Pry family cell wall protein; Rim101, Efg1, Ssn6, alkaline repressed; O-glycosylation; no GPI anchor predicted; ketoconazol induced; regulated by Sef1, Sfu1, Hap4; flow model biofilm induced; rat catheter and Spider biofilm repressed
ENA21	orf19.5170	orf19.5170	685.638	810.399	150.175	119.75	-2.47051	0.000848373	Predicted P-type ATPase sodium pump; Gcn4p-regulated; flucytosine, amphotericin B, or ketoconazole-induced; osmotic stress-induced; overlaps orf19.5170.1, which is annotated as a blocked reading frame; Spider biofilm induced
C1_14060W_A	orf19.7214	orf19.7214	157.251	225.951	62.7536	34.1861	-1.98295	0.000848373	Glucan 1,3-beta-glucosidase; regulated by Nrg1, Tup1 and possibly Tac1; induced by NO and during cell wall regeneration; stationary phase enriched; possibly essential (UAU1 method); F-12/CO2 early biofilm induced; flow biofilm repressed
ECM14	orf19.299	orf19.299	144.661	175.58	44.8818	42.5779	-1.87247	0.000848373	Has domain(s) with predicted metallocarboxypeptidase activity, zinc ion binding activity and role in proteolysis
SYG1	orf19.768	orf19.768	29.0304	24.3272	8.95333	5.76895	-1.85769	0.000848373	Ortholog(s) have role in signal transduction and plasma membrane localization
C4_03190W_A	orf19.2671	orf19.267	68.8378	44.669	24.4485	21.3233	-1.31025	0.000848373	Protein with a predicted FAD-dependent pyridine nucleotide reductase domains; putative oxidoreductase; Plc1-regulated; possibly an essential gene, disruptants not obtained by UAU1 method
DUN1	orf19.4002	orf19.4002	23.3632	25.0678	11.5311	8.85317	-1.24848	0.00592979	Protein similar to S. cerevisiae Dun1p, which is a serine-threonine protein kinase involved in DNA damage cell-cycle checkpoint; induced under Cdc5p depletion
CEK2	orf19.460	orf19.460	321.789	320.214	162.394	115.647	-1.20729	0.00592979	MAP kinase required for wild-type efficiency of mating; component of the signal transduction pathway that regulates mating; ortholog of S. cerevisiae Fus3; induced by Cph1, pheromone; transposon mutation affects filamentous growth
HSL1	orf19.4308	orf19.4308	37.4719	45.1702	19.8049	16.5359	-1.18529	0.00219792	Probable protein kinase involved in determination of morphology during the cell cycle of both yeast-form and hyphal cells via regulation of Swe1p and Cdc28p; required for full virulence and kidney colonization in mouse systemic infection
GDE1	orf19.3936	orf19.3936	117.173	101.247	50.9305	49.2711	-1.1242	0.0107075	Glycerophosphocholine phosphodiesterase; mutation confers hypersensitivity to 5-fluorouracil (5-FU); F-12/CO2 early biofilm induced
ACE2	orf19.6124	orf19.6124	55.485	46.1948	24.7701	22.8101	-1.0956	0.00862192	Transcription factor; similar to S. cerevisiae Ace2 and Swi5; regulates morphogenesis, cell separation, adherence, virulence in a mice; mutant is hyperfilamentous; rat catheter and Spider biofilm induced
C3_02010C_A	orf19.1647	orf19.1643	4.45059	3.43472	2.09173	1.73963	-1.04131	0.331755	Ortholog(s) have role in ascospore wall assembly
XOG1	orf19.2990	orf19.10507	219.264	202.552	84.3936	121.109	-1.03746	0.0200408	Exo-1,3-beta-glucanase; 5 glycosyl hydrolase family member; affects sensitivity to chitin and glucan synthesis inhibitors; not required for yeast-to-hypha transition or for virulence in mice; Hap43-induced; Spider biofilm induced
SPS20	orf19.4157	orf19.4157	188.226	169.597	101.32	82.7946	-0.958646	0.0225887	Peroxisomal 2,4-dienoyl-CoA reductase; stationary phase enriched protein; Spider biofilm induced
UGA32	orf19.6038	orf19.6038	19.2862	19.791	12.1587	8.06692	-0.950144	0.0450317	Predicted Zn(II)2Cys6 transcription factor; has similarity to S. cerevisiae Uga3, a transcription factor involved in the regulation of gamma-aminobutyrate metabolism genes; rat catheter biofilm induced
C2_07630C_A	orf19.1862	orf19.2217	314.796	287.953	209.617	103.363	-0.94549	0.0342739	Possible stress protein; increased transcription associated with CDR1 and CDR2 overexpression or fluphenazine treatment; regulated by Sfu1, Nrg1, Tup1; stationary phase enriched protein; Spider biofilm induced
C1_01910W_A	orf19.4532	orf19.4529	168.314	160.556	76.8308	96.8812	-0.920818	0.0358571	Protein of unknown function; present in exponential and stationary growth phase yeast cultures
YBL053	orf19.4136	orf19.4139	13.3193	16.989	7.46473	9.08578	-0.872836	0.0396549	Putative subunit of a replication fork-pausing checkpoint complex
BMH1	orf19.3014	orf19.3014	1782.47	1864.64	1187.68	839.483	-0.847293	0.0884968	Sole 14-3-3 protein in C. albicans; role in hyphal growth; possibly regulated by host interaction; localizes to yeast-form cell surface, not hyphae; alternatively spliced 5' UTR intron; Spider biofilm repressed
FLC2	orf19.1813	orf19.1813	76.13	87.9754	48.6892	43.1772	-0.837014	0.0587422	Protein involved in heme uptake; putative FAD transporter, similar to S. cerevisiae Flc2p
C1_13770C_A	orf19.5014	orf19.5014	9.83527	10.9973	5.56666	6.24253	-0.818929	0.321943	Has domain(s) with predicted nucleic acid binding activity
SAP98	orf19.852	orf19.852	32.7146	47.8826	30.2662	15.514	-0.816008	0.0867909	Glycosyl-phosphatidylinositol-anchored aspartic endopeptidase; regulated by Gcn2p and Gcn4p; expressed only in opaque MTLa/MTLa cells
CDC10	orf19.548	orf19.548	110.958	111.178	72.0832	55.2262	-0.803103	0.0759481	Septin, required for wild-type cell, hyphal, or chlamydospore morphology; role in virulence and kidney tissue invasion in mouse infection; forms ring at sites of cell division and filaments in mature chlamydospore; Spider biofilm repressed
CZF1	orf19.3127	orf19.3127	415.138	293.421	214.945	195.856	-0.78645	0.112823	Transcription factor; regulates white-opaque switch; hyphal growth regulator; expression in S. cerevisiae causes dominant-negative inhibition of pheromone response; required for yeast cell adherence to silicone; Spider biofilm induced
C7_00310C_A	orf19.7091	orf19.7086	35.7968	35.188	21.5882	19.7299	-0.780739	0.130136	Protein of unknown function; induced by nitric oxide; Spider biofilm repressed
SLK19	orf19.6763	orf19.6763	736.33	695.102	532.152	302.132	-0.778849	0.130136	Alkaline-induced protein of plasma membrane; affects cell aggregation, cell wall; similar to S. cerevisiae Slk19p (a kinetochore protein with roles in mitosis, meiosis); required for wild-type virulence in mouse; macrophage-downregulated
C2_07800W_A	orf19.2201	orf19.7693	169.126	144.48	73.8236	109.998	-0.770644	0.147304	Ortholog(s) have ribosome binding activity, role in mitochondrial respiratory chain complex III assembly, positive regulation of mitochondrial translation and Cbp3p-Cbp6 complex, mitochondrial ribosome localization
WOR3	orf19.467	orf19.467	676.841	746.131	475.771	369.728	-0.751031	0.153124	Transcription factor; modulator of white-opaque switch; induced in opaque cells; promoter bound by Wor1; overexpression at 25 degr shifts cells to opaque state; deletion stabilizes opaque cells at higher temperatures; Spider biofilm induced
RTG1	orf19.4722	orf19.12185	52.3086	57.8881	42.1285	24.3591	-0.728925	0.316422	RNA polymerase II transcription factor involved in regulation of galactose catabolism genes; as result of transcriptional rewiring, performs role analogous to Gal4p in S. cerevisiae
C3_04420W_A	orf19.5892	orf19.5892	23.9712	25.244	19.6217	10.9116	-0.68872	0.126822	Ortholog of S. cerevisiae Hul4; similar to hect domain E3 ubiquitin-protein ligases; Hap43-repressed gene
CR_02500W_A	orf19.175	orf19.1729	10.5128	12.8083	8.39734	6.36924	-0.659298	0.240251	Ortholog of C. dubliniensis CD36 : Cd36_27430, C. parapsilosis CDC317 : CPAR2_802450, Candida tenuis NRRL Y-1498 : CANTEDRAFT_113969 and Debaryomyces hansenii CBS767 : DEHA2A13002g
TAF14	orf19.798	orf19.798	178.233	173.046	112.663	113.01	-0.638378	0.165279	Putative DNA-binding transcription factor; TFIIF subunit; macrophage-induced protein; possibly required for yeast cell adherence to silicone substrate; mutant has pleiotrophic effects
C3_07450C_A	orf19.6744	orf19.6741	19.6689	32.6779	26.9838	6.82721	-0.630611	0.297793	Has domain(s) with predicted endodeoxyribonuclease activity, producing 5'-phosphomonoesters activity
VPS28	orf19.212	orf19.212	40.6445	36.7846	31.0006	19.138	-0.626956	0.24757	ESCRT I protein sorting complex subunit; involved in Rim8 processing and proteolytic activation of Rim101, which regulates pH response; role in echinocandin, azole sensitivity
YOX1	orf19.7017	orf19.7017	15.4121	17.298	18.3466	2.9643	-0.618144	0.342671	Putative homeodomain-containing transcription factor; transcriptional repressor; periodic mRNA expression, peak at cell-cycle G1/S phase
PKC1	orf19.5901	orf19.5901	52.6607	59.8919	41.9043	32.7918	-0.591495	0.228834	Protein kinase C; functional homolog of S. cerevisiae Pkc1p; mutant has abnormal yeast-form cell morphology and increased cell lysis; activated by phosphatidylserine; target of antifungal, cercosporamide; R400P mutant is activated
C2_02230C_A	orf19.1541	orf19.9115	229.044	236.331	186.977	124.834	-0.577722	0.285584	Protein with a globin-like domain; repressed by alpha pheromone in SpiderM medium; Spider biofilm induced
FGR2	orf19.7071	orf19.7071	26.3115	21.5986	21.3909	10.8051	-0.573449	0.253633	Protein similar to phosphate transporters; transposon mutation affects filamentous growth; expression is regulated upon white-opaque switching
LIP6	orf19.4823	orf19.4823	18.0785	14.5227	12.7967	9.30806	-0.560571	0.331037	Secreted lipase, member of family of lipase genes expressed differentially in response to carbon source and during infection; may have a role in nutrition and/or in creating an acidic microenvironment; induced on adherence to polystyrene
CPH1	orf19.4433	orf19.4433	16.6286	22.3085	14.4924	12.0841	-0.550996	0.259451	Transcription factor; for mating, filamentation on solid media, pheromone-stimulated biofilms; in pathway with Ess1, Czf1; required with Efg1 for host cytokine response; regulates galactose metabolism genes; rat cathether biofilm repressed
TUP1	orf19.6109	orf19.6109	476.266	445.271	389.953	239.208	-0.550612	0.316806	Transcriptional corepressor; represses filamentous growth; regulates switching; role in germ tube induction, farnesol response; in repression pathways with Nrg1, Rfg1; farnesol upregulated in biofilm; rat catheter, Spider biofilm repressed
GLX3	orf19.251	orf19.251	831.981	959.558	693.857	538.193	-0.540139	0.321464	Glutathione-independent glyoxalase; binds human immunoglobulin E; alkaline, fluconazole, Hog1 repressed; hypoxia, oxidative stress via Cap1, Hap43 induced; stationary-phase enriched; rat catheter, Spider biofilm induced
GIN1	orf19.658	orf19.658	21.4697	24.7878	13.1295	19.0588	-0.523154	0.289384	Protein involved in regulation of DNA-damage-induced filamentous growth; putative component of DNA replication checkpoint; ortholog of S. cerevisiae Mrc1p, an S-phase checkpoint protein; Hap43p-induced gene
SLA2	orf19.7201	orf19.7201	63.4625	88.3557	57.81	48.6498	-0.512036	0.322883	Actin binding protein with roles in growth control and morphogenesis; required for alkaline pH-induced hyphal formation; localized to actin patches; rat catheter biofilm repressed
SNQ2	orf19.5759	orf19.5759	32.1438	39.8552	25.9582	24.5421	-0.511685	0.319221	Protein similar to S. cerevisiae Snq2p transporter; member of PDR subfamily of ABC family; transposon mutation affects filamentation; benomyl-induced transcription; detected at yeast-form cell plasma membrane by mass spec
HOF1	orf19.5664	orf19.5664	11.7276	14.006	10.8921	7.29647	-0.500616	0.387899	Ortholog of S. cerevisiae Hof1; a protein localized to the bud neck and required for cytokinesis in S. cerevisiae; periodic mRNA expression, peak at cell-cycle G2/M phase; mutant is viable
VTI1	orf19.337	orf19.337	61.8984	77.8547	55.5102	43.4341	-0.498191	0.352806	Ortholog(s) have SNAP receptor activity and role in Golgi to vacuole transport, intra-Golgi vesicle-mediated transport, macroautophagy, vacuole fusion, non-autophagic, vesicle fusion
CR_00420W_A	orf19.7490	orf19.7489	8.85466	10.7881	7.31228	6.809	-0.47613	0.463411	Predicted membrane transporter; fucose:proton symporter family member, MFS superfamily; flow model biofilm induced
C5_00530W_A	orf19.936	orf19.2225	44.6749	38.6981	21.9284	38.6506	-0.460763	0.371248	Ortholog of C. dubliniensis CD36 : Cd36_50530, C. parapsilosis CDC317 : CPAR2_303990, Candida tenuis NRRL Y-1498 : CANTEDRAFT_107934 and Pichia stipitis Pignal : PICST_63283
ECM4	orf19.2613	orf19.2613	196.541	204.177	181.555	111.637	-0.450736	0.400802	Cytoplasmic glutathione S-transferase; regulated by Nrg1, Tup1; induced in core stress response, in cyr1 or ras1 mutant (yeast or hyphal cells); Tn mutation affects filamentous growth; stationary phase enriched; Spider biofilm induced
C3_05900W_A	orf19.7370	orf19.7370	183.129	133.88	81.9257	152.267	-0.436828	0.439875	Possible G-protein coupled receptor; vacuolar membrane transporter for cationic amino acids; PQ-loop motif; rat catheter and Spider biofilm induced
C6_04280W_A	orf19.1085	orf19.1085	130.899	145.565	107.69	99.3857	-0.416931	0.424798	Ortholog(s) have ubiquitin-protein transferase activity, role in hyphal growth, ubiquitin-dependent ERAD pathway, vesicle organization and proteasome complex localization
C6_04340W_A	orf19.1092	orf19.1092	27.3258	28.6081	16.6832	25.3781	-0.411228	0.454831	Dolichol-P-Man dependent alpha(1-3) mannosyltransferase; role in the synthesis of dolichol-linked oligosaccharide donor for N-linked glycosylation of proteins; rat catheter biofilm repressed
DIE2	orf19.6971	orf19.6971	3.67732	3.85083	1.28175	4.41086	-0.403204	0.726764	Ortholog(s) have dolichyl-phosphate-glucose-glycolipid alpha-glucosyltransferase activity, role in protein N-linked glycosylation and endoplasmic reticulum membrane localization
DFG10	orf19.209	orf19.209	21.0418	19.6175	18.24	12.8592	-0.386707	0.576836	Ortholog(s) have role in dolichol biosynthetic process, dolichol-linked oligosaccharide biosynthetic process, polyprenol catabolic process, pseudohyphal growth
CAT8	orf19.5097	orf19.5097	16.1072	19.6992	12.6868	14.9713	-0.372511	0.504211	Zn(II)2Cys6 transcription factor; similar to S. cerevisiae Cat8 but mutant phenotype suggests different target genes; mutant displays increased filamentous/invasive growth; flucytosine repressed; rat catheter biofilm induced
SUN41	orf19.3642	orf19.3642	292.276	278.875	184.322	259.016	-0.365465	0.632389	Cell wall glycosidase; role in biofilm formation and cell separation; possibly secreted; hypoxia, hyphal induced; caspofungin repressed; Efg1, Cph1 regulated; O-glycosylated, possible Kex2 substrate; 5'-UTR intron; Spider biofilm induced
HOG1	orf19.895	orf19.895	131.969	140.209	105.867	110.911	-0.328328	0.577839	MAP kinase of osmotic-, heavy metal-, and core stress response; role in regulation of glycerol, D-arabitol in response to stress; phosphorylated in response to H2O2 (Ssk1-dependent) or NaCl; mutant induces protective mouse immune response
CR_08420W_A	orf19.6408	orf19.641	72.2532	64.6127	63.9688	45.1721	-0.326572	0.568806	Putative DnaJ-like heat shock/chaperone; Hap43-repressed; Spider and F-12/CO2 biofilm induced
SEC34	orf19.4440	orf19.4440	25.5262	27.3586	23.5593	18.7682	-0.321257	0.575588	Ortholog(s) have protein transporter activity and role in ER to Golgi vesicle-mediated transport, autophagy of peroxisome, macroautophagy, protein localization by the Cvt pathway, retrograde transport, vesicle recycling within Golgi
VPS16	orf19.6848	orf19.6848	20.3156	20.3406	19.0099	13.7724	-0.31056	0.59275	Protein similar to S. cerevisiae Vps16p, which is involved in protein-vacuolar targeting; likely to be essential for growth, based on insertional mutagenesis; downregulated in biofilm or in azole-resistant strain that overexpresses MDR1
SNF5	orf19.5871	orf19.5871	30.0166	32.6922	27.4291	23.2879	-0.306197	0.599108	SWI/SNF chromatin remodeling complex subunit involved in transcriptional regulation; mutants have defects in silicone adherence, biofilm formation, hyphal morphogenesis, cell wall defects; increased cell aggregation during yeast form growth
MNN9	orf19.7383	orf19.7383	75.1453	94.4923	71.6533	65.7706	-0.303823	0.604954	Protein of N-linked outer-chain mannan biosynthesis; mutant has defective cell wall; required for wild-type hyphal growth; mutant is hygromycin B sensitive and vanadate resistant; has N-terminal membrane-spanning segment (positions 18-34)
MSB2	orf19.1490	orf19.1490	221.958	195.218	155.167	182.828	-0.303654	0.661925	Mucin family adhesin-like protein; cell wall damage sensor; required for Cek1 phosphorylation by cell wall stress; Rim101-repressed; activation releases extracellular domain into medium; Spider biofilm induced
C3_05410W_A	orf19.6979	orf19.698	49.8156	45.607	40.6534	37.2112	-0.293363	0.630062	Ortholog(s) have role in cellular manganese ion homeostasis, mitochondrion organization
HAP5	orf19.1973	orf19.1973	63.2757	66.8589	52.1712	54.3943	-0.288265	0.611179	Component of CCAAT-binding transcription factor; roles in filamentous growth, low-iron induction of FRP1; regulates genes involved in respiratory growth; functional homolog of S. cerevisiae Hap5p; Cap1p-dependent expression in low iron
C6_00190W_A	orf19.1177	orf19.1178	32.3202	43.416	35.7206	26.3873	-0.286204	0.632742	Ortholog of S. cerevisiae Rtt106; histone chaperone that regulates chromatin structure in transcribed and silenced chromosomal regions; affects transcriptional elongation; Hap43-repressed; Spider biofilm repressed
C7_00920C_A	orf19.7022	orf19.702	26.7495	23.1951	22.0478	18.9508	-0.284754	0.670667	Ortholog of C. dubliniensis CD36 : Cd36_70850, Candida tenuis NRRL Y-1498 : cten_CGOB_00183, Debaryomyces hansenii CBS767 : DEHA2F22462g and Pichia stipitis Pignal : PICST_60416
C1_02210W_A	orf19.3678	orf19.3678	73.1175	59.5217	57.9872	51.0423	-0.282787	0.63759	Ortholog of C. dubliniensis CD36 : Cd36_02060, C. parapsilosis CDC317 : CPAR2_106200, Candida tenuis NRRL Y-1498 : CANTEDRAFT_96322 and Debaryomyces hansenii CBS767 : DEHA2C02310g
SAP8	orf19.242	orf19.242	1.97846	1.54683	1.60637	1.31618	-0.270509	0.875107	Secreted aspartyl protease; regulated by growth phase, temperature, white-opaque switch; highly expressed in opaque cells and upon deep epidermal invasion; greater expression in vaginal than oral infection; prominent role in biofilms
NGG1	orf19.3023	orf19.3023	30.6247	38.5256	29.6241	27.803	-0.268004	0.653704	Ortholog(s) have histone acetyltransferase activity, role in histone acetylation, regulation of transcription by RNA polymerase II and Ada2/Gcn5/Ada3 transcription activator complex, SAGA complex, SLIK (SAGA-like) complex localization
LPG20	orf19.771	orf19.771	21.2786	22.0796	20.7182	15.3797	-0.264389	0.70787	Aldo-keto reductase family protein; similar to aryl alcohol dehydrogenases; osmotic stress-induced, correlates with overexpression of MDR1 in fluconazole-resistant isolate; stationary phase enriched protein
CAP4	orf19.861	orf19.861	32.4877	24.6285	26.0196	21.5783	-0.263004	0.771518	Predicted bZip transcription factor; possibly an essential gene, disruptants not obtained by UAU1 method
CMP1	orf19.6033	orf19.6033	47.2451	54.7883	47.3589	38.1065	-0.255629	0.682563	Catalytic subunit of calcineurin (Ca[2+]-calmodulin-regulated S/T protein phosphatase); required for wild-type virulence, resistance to high pH, Na(+), Li(+), Mn(2+), and fluconazole tolerance; micafungin is fungicidal to null mutant
C2_02020W_A	orf19.1516	orf19.1516	19.8022	25.6004	22.2379	15.8216	-0.254517	0.681557	Ortholog(s) have thiol-dependent ubiquitin-specific protease activity and role in negative regulation of gluconeogenesis, proteasome-mediated ubiquitin-dependent protein catabolic process
BUB1	orf19.2678	orf19.2678	14.213	15.8573	15.8957	9.72677	-0.230931	0.725566	Putative cell cycle checkpoint kinase; mutation confers increased sensitivity to nocodazole
C1_10730W_A	orf19.2346	orf19.2336	39.7583	42.112	38.448	31.3185	-0.230806	0.722508	Putative protein of unknown function, transcription is positively regulated by Tbf1p
MKC1	orf19.7523	orf19.7523	118.54	114.735	100.249	99.6398	-0.222835	0.740674	MAP kinase; role in biofilm formation, contact-induced invasive filamentation, systemic virulence in mouse, cell wall structure/maintenance, caspofungin response; phosphorylated on surface contact, membrane perturbation, or cell wall stress
OCA1	orf19.1762	orf19.9331	20.0593	28.6456	20.4595	21.3957	-0.21866	0.788826	Putative protein phosphatase of the PTP family (tyrosine-specific); ortholog of S. cerevisiae Oca1; mutant is viable; mutant shows virulence defect
C3_00470W_A	orf19.5418	orf19.5412	39.6234	46.0758	37.594	36.1158	-0.217425	0.733196	Ortholog(s) have role in ER to Golgi vesicle-mediated transport
SPT3	orf19.7622	orf19.7622	33.4597	40.4654	33.1701	30.6817	-0.211337	0.75544	Functional homolog of S. cerevisiae Spt3p; required for virulence in mouse systemic infection; homozygous null mutant is hyperfilamentous
C4_01020C_A	orf19.4686	orf19.4678	38.7429	44.1113	34.8203	36.8216	-0.209772	0.760452	Ortholog of S. cerevisiae : ESL1, C. glabrata CBS138 : CAGL0H06611g, C. dubliniensis CD36 : Cd36_41030, C. parapsilosis CDC317 : CPAR2_401340 and Candida tenuis NRRL Y-1498 : CANTEDRAFT_104645
SSK2	orf19.3775	orf19.11257	42.6939	47.0846	37.8508	40.3227	-0.19969	0.771327	MAP kinase kinase kinase (MAPKKK); regulates Hog1 activation and signaling; repressed by ciclopirox olamine
C1_01490W_A	orf19.3335	orf19.3335	487.505	560.405	442.563	481.75	-0.18106	0.81052	Plasma membrane protein of unknown function; colony morphology-related gene regulation by Ssn6; repressed by nitric oxide
C3_03860W_A	orf19.6929	orf19.14185	57.5622	58.1065	43.302	59.1542	-0.174991	0.821146	Ortholog(s) have acid phosphatase activity, protein tyrosine phosphatase activity, metal-dependent activity
C1_01090C_A	orf19.3297	orf19.33	462.717	347	317.075	400.297	-0.174695	0.800006	Ortholog(s) have structural constituent of ribosome activity and mitochondrial small ribosomal subunit localization
CBK1	orf19.4909	orf19.4909	61.8107	53.8258	52.7048	50.3136	-0.166695	0.817024	Ser/Thr kinase of cell wall integrity pathway; mutants show abnormal morphology and aggregation; Mob2p associated; required for wild-type hyphal growth and transcriptional regulation of cell-wall-associated genes
PEP8	orf19.6927	orf19.6927	34.1392	44.9393	39.753	30.8692	-0.163164	0.817895	Protein similar to S. cerevisiae Pep8p, which is involved in retrograde transport; transposon mutation affects filamentous growth
C7_00910C_A	orf19.7023	orf19.7020	30.7694	27.0503	31.1821	20.6645	-0.157313	0.826764	Ortholog of S. cerevisiae Ioc4, a protein that influences gene expression through chromatin remodeling; oxidative stress-induced via Cap1
C2_02660W_A	orf19.5841	orf19.584	20.2017	14.5087	20.7093	10.4786	-0.154382	0.886581	Ortholog of C. dubliniensis CD36 : Cd36_17700, C. parapsilosis CDC317 : CPAR2_212340, Candida tenuis NRRL Y-1498 : CANTEDRAFT_101113 and Debaryomyces hansenii CBS767 : DEHA2G03784g
C2_05640W_A	orf19.6874	orf19.6874	77.5767	59.2511	62.9508	60.3724	-0.149916	0.83837	Putative helix-loop-helix (HLH) transcription factor with a role in filamentous growth
CR_09660W_A	orf19.6597	orf19.6592	26.2244	21.1929	12.9408	30.0112	-0.142687	0.977228	Ortholog of S. cerevisiae : YLR287C, C. glabrata CBS138 : CAGL0M09757g, C. dubliniensis CD36 : Cd36_34830, C. parapsilosis CDC317 : CPAR2_701110 and Candida tenuis NRRL Y-1498 : CANTEDRAFT_114424
C1_09020W_A	orf19.4758	orf19.4758	129.824	142.727	120.669	126.766	-0.139478	0.847259	Putative reductase or dehydrogenase; Hap43-repressed gene; alkaline repressed
RIC1	orf19.6036	orf19.6036	8.64836	10.2052	8.57667	8.56486	-0.137342	0.860257	Ortholog of S. cerevisiae Ric1 guanyl-nucleotide exchange factor; mutant is viable; rat catheter biofilm repressed
TRY4	orf19.5975	orf19.5975,orf19.13396	121.25	148.343	116.532	130.016	-0.128916	0.864058	C2H2 transcription factor; fluconazole-repressed; induced in ssr1 mutant; required for yeast cell adherence to silicone substrate; Spider biofilm induced
C1_12580W_A	orf19.3758	orf19.3751	64.6916	59.3721	59.292	54.3614	-0.126441	0.86764	Has domain(s) with predicted membrane localization
HYR1	orf19.4975	orf19.4975	11.957	13.8265	12.8507	10.8151	-0.123646	0.871914	GPI-anchored hyphal cell wall protein; macrophage-induced; repressed by neutrophils; resistance to killing by neutrophils, azoles; regulated by Rfg1, Efg1, Nrg1, Tup1, Cyr1, Bcr1, Hap43; Spider and flow model biofilm induced
C1_03450C_A	orf19.3047	orf19.3047	25.074	25.6966	23.955	22.8982	-0.115847	0.879849	Protein kinase-related protein, required for normal sensitivity to caspofungin
C4_01240C_A	orf19.4665	orf19.4658	53.2469	50.0642	51.4925	43.9693	-0.114001	0.892507	Protein of unknown function; Spider biofilm induced
SNF7	orf19.6040	orf19.13461	153.16	145.139	144.01	131.72	-0.113507	0.883085	ESCRT III complex protein; role in proteolytic activation of Rim101 and Rim8 processing/activation; separable roles in RIM101 pathway and in transport from MVB to vacuole; involved in echinocandin and azole sensitivity
CAS4	orf19.1693	orf19.1694	25.7091	31.4837	28.4908	24.7699	-0.10276	0.899743	RAM cell wall integrity signaling network protein; cell separation, azole sensitivity; needed for hyphal growth; insertion mutation near 3' end of gene increases caspofungin sensitivity; pheromone/hyphal induced; flow biofilm repressed
GPD2	orf19.691	orf19.691	4162.08	2818.14	2634.83	3869.35	-0.101906	0.909375	Surface protein similar to glycerol 3-P dehydrogenase; binds host Factor H, FHL-1, plasminogen; regulated by Ssn6, Nrg1, Efg1; induced by cell wall regeneration, macrophage/pseudohyphal growth, core stress response; Spider biofilm induced
C3_05330C_A	orf19.6970	orf19.6970	3.53426	3.54011	4.12416	2.48262	-0.0986548	0.951835	Ortholog of C. dubliniensis CD36 : Cd36_85310, C. parapsilosis CDC317 : CPAR2_807370, Candida tenuis NRRL Y-1498 : CANTEDRAFT_115544 and Debaryomyces hansenii CBS767 : DEHA2D11770g
MKK2	orf19.6889	orf19.6889	33.1086	43.2235	41.8631	29.5961	-0.0951694	0.902527	Ortholog of S. cerevisiae Mkk2; MAP kinase kinase involved in signal transduction; macrophage-downregulated; mutants are viable and hypersensitive to caspofungin
EAF3	orf19.2660	orf19.2660	100.166	63.9404	52.738	101.012	-0.0940412	0.909698	Subunit of the NuA4 histone acetyltransferase complex; rat catheter and Spider biofilm induced
CR_09140C_A	orf19.7310	orf19.7310	68.4115	61.6331	73.5858	49.843	-0.0753287	0.929173	Protein with a role in directing meiotic recombination events to homologous chromatids; induced by ciclopirox olamine; positively regulated by Sfu1; Hog1, fluconazole-repressed; Hap43-induced; Spider biofilm induced
PHR3	orf19.377	orf19.5632	137.58	91.5341	91.8548	130.356	-0.0441424	0.973476	Putative beta-1,3-glucanosyltransferase with similarity to the A. fumigatus GEL family; fungal-specific (no human or murine homolog); possibly an essential gene, disruptants not obtained by UAU1 method
CR_10530W_A	orf19.7632	orf19.764	11.4881	16.0427	15.2226	11.5075	-0.0425832	0.964699	Ortholog of C. dubliniensis CD36 : Cd36_35360, C. parapsilosis CDC317 : CPAR2_200320, Candida tenuis NRRL Y-1498 : CANTEDRAFT_136418 and Debaryomyces hansenii CBS767 : DEHA2A14080g
ZCF29	orf19.5133	orf19.5133,orf19.12598	67.2227	54.2931	50.008	68.9045	-0.0312438	0.972762	Zn(II)2Cys6 transcription factor; mutants sensitive to caffeine, menadione, beauvericin;resistant to fenpropimorph; Hap43-repressed; mutants have decreased CFU in mouse kidneys and defects in filamentous growth; Spider biofilm induced
CEX1	orf19.3744	orf19.3744	14.5037	15.5759	16.3713	13.0753	-0.0306845	0.972018	Ortholog(s) have tRNA binding activity, role in tRNA export from nucleus and cytoplasm, nuclear pore localization
AAT22	orf19.4669	orf19.4669	94.6602	83.7745	44.1877	130.729	-0.0287292	0.975019	Aspartate aminotransferase; nitrogen metabolism; similar but not orthologous to S. cerevisiae Aat2; clade-associated gene expression; protein levels decrease in stationary phase yeast; mutant is viable; flow model biofilm repressed
C5_02440C_A	orf19.4252	orf19.4252	20.9577	28.3119	20.1544	28.1701	-0.0279386	0.976232	Ortholog(s) have protein serine/threonine kinase activity
C1_04620W_A	orf19.6855	orf19.782	38.3302	43.824	37.7481	43.0119	-0.0246935	0.977833	Ortholog of C. dubliniensis CD36 : Cd36_04370, C. parapsilosis CDC317 : CPAR2_105410, Candida tenuis NRRL Y-1498 : CANTEDRAFT_114891 and Debaryomyces hansenii CBS767 : DEHA2D13420g
CTR2	orf19.4720	orf19.4720	232.362	183.504	190.568	218.487	-0.0238238	0.977182	Putative low-affinity copper transporter of the vacuolar membrane; induced by nitric oxide; clade-associated gene expression; rat catheter and flow model biofilm induced
KIN3	orf19.5325	orf19.5325	100.683	94.1371	94.2517	97.6169	-0.0220232	0.982855	Protein similar to S. cerevisiae Kin3p; induced under Cdc5p depletion; shows Mob2p-dependent hyphal regulation; mutants are hypersensitive to caspofungin
C1_12090C_A	orf19.5256	orf19.5253	0.614622	1.36151	0.62841	1.324	-0.0174256	1	Protein of unknown function; Hap43-repressed gene; induced by alpha pheromone in SpiderM medium
APL5	orf19.248	orf19.248	26.832	27.0511	25.5732	27.8329	-0.0128294	0.986783	Ortholog of S. cerevisiae and S. pombe Apl5; subunit of the AP-3 adaptor complex involved in Golgi-to-vacuole transport; phosphorylated protein; mutant is viable;
TPS1	orf19.6640	orf19.6640	61.2524	60.3804	73.6106	47.5476	-0.00564043	0.994161	Trehalose-6-phosphate synthase; role in hyphal growth and virulence in mouse systemic infection; induced in presence of human neutrophils; macrophage/pseudohyphal-repressed after 16h; stationary phase enriched protein; Hap43-repressed
RGS2	orf19.695	orf19.695	31.1455	32.754	22.9741	40.9171	-0.000186298	0.998407	Protein of RGS superfamily; mutants are viable; rat catheter and Spider biofilm induced
C3_03620C_A	orf19.6957	orf19.6951	0	0	0	0	0	1	Protein of unknown function
OCH1	orf19.7391	orf19.7391	60.4894	82.3157	71.8063	71.1476	0.00150217	0.997632	Alpha-1,6-mannosyltransferase; initiates N-glycan outer chain branch addition; similar to S. cerevisiae Och1p; required for wild-type virulence in mouse intravenous infection; fungal-specific (no human or murine homolog)
ZCF16	orf19.2808	orf19.2808	17.5852	31.8877	25.3585	24.2311	0.00340018	0.986974	Predicted Zn(II)2Cys6 transcription factor; mutants are viable; rat catheter biofilm induced
IRE1	orf19.5068	orf19.5068	46.6145	48.6604	45.712	50.684	0.0168772	0.983421	Putative protein kinase; role in cell wall regulation; mutant is hypersensitive to caspofungin; Spider biofilm induced
IRS4	orf19.6953	orf19.14215	36.3723	50.0522	48.0701	40.2889	0.0319355	0.992067	Protein with roles in cell wall integrity, systemic (but not oral) murine infection, adherence, hyphal growth, and agar-embedded filamentous growth; antigenic in human infection; similar to S. cerevisiae Irs4p
RTG3	orf19.2315	orf19.2315	101.594	77.4022	80.8347	103.182	0.039909	0.965602	Transcription factor with bZIP motif involved in regulation of galactose catabolism genes; as result of transcriptional rewiring, performs role analogous to Gal4p in S. cerevisiae; regulates carbon source-dependent stress response
GUA1	orf19.4813	orf19.12276	350.703	309.019	258.309	423.923	0.0484039	0.95971	Putative GMP synthase, involved in the final step of guanine biosynthesis; soluble protein in hyphae; flucytosine induced; macrophage-downregulated protein abundance; protein level decreases in stationary phase cultures
SSN3	orf19.794	orf19.794	15.9229	18.6186	16.4474	19.3234	0.0504482	0.953267	Putative cyclin-dependent protein kinase; mutants are sensitive to growth on H2O2 medium
YCK2	orf19.7001	orf19.7001	260.919	220.608	224.463	275.215	0.0533841	0.955331	Plasma membrane protein similar to S. cerevisiae casein kinase I, Yck2p; null mutant has defect in damaging oral epithelial cells and in hyphal branching; transcription is activated in weak acid stress or on contact with host cells
PRR2	orf19.1341	orf19.1341	41.5321	33.4678	39.5394	38.3611	0.0547425	0.948366	Putative serine/threonine protein kinase; mutation confers resistance to 5-fluorocytosine (5-FC)
IFK2	orf19.856	orf19.856	22.1411	23.0682	28.0485	18.9341	0.0555052	0.947596	Putative thiol-specific monooxygenase; mutant is viable; flow model biofilm induced
KIN2	orf19.7510	orf19.7510	58.158	64.8038	72.9147	55.3057	0.0604145	0.947832	Protein with similarity to S. cerevisiae Kin2p, transcription is positively regulated by Tbf1
C5_03150W_A	orf19.4347	orf19.4347	317.839	203.698	285.332	261.476	0.0682656	0.940943	Putative serine/threonine protein kinase; Hog1p-induced
GAP1	orf19.4304	orf19.4304	151.229	146.927	128.558	184.234	0.0691369	0.939758	Amino acid permease; antigenic in human/mouse; 10-12 transmembrane regions; regulated by nitrogen source; alkaline, GlcNAc, phagocytosis induced; WT virulence in mice; Spider and flow model biofilm induced
CR_06140W_A	orf19.3869	orf19.3869	240.117	207.774	192.937	277.064	0.0695166	0.937342	Protein of unknown function; regulated by Tsa1, Tsa1B in minimal media at 37 degrees C; shows colony morphology-related gene regulation by Ssn6; Spider biofilm induced
RLM1	orf19.4662	orf19.4662	56.4239	50.1265	53.491	58.9087	0.0771007	0.924161	Putative transcription factor; required for wild-type resistance to cell wall perturbation, caspofungin treatment; regulates caspofungin induction of PGA13
C3_05680W_A	orf19.7347	orf19.7353	49.3994	39.2163	37.5378	56.1564	0.0803987	0.934788	Ortholog(s) have ubiquitin-protein transferase activity, role in protein monoubiquitination, protein polyubiquitination, ubiquitin-dependent ERAD pathway and endoplasmic reticulum membrane localization
ZCF32	orf19.5940	orf19.5940	15.1518	15.7886	16.9634	15.8138	0.0832013	0.916269	Zn(II)2Cys6 transcription factor involved in regulation of biofilm formation; Hap43-repressed
PPR1	orf19.3986	orf19.3986	6.49775	9.58121	8.02547	9.09552	0.0905911	0.916876	Transcription factor with zinc cluster DNA-binding motif involved in regulation of purine catabolism; has similarity to S. cerevisiae Ppr1p, which is a transcription factor involved in the regulation of uracil biosynthesis genes
C4_02860W_A	orf19.2710	orf19.2703	92.3343	89.6412	105.078	89.9387	0.0998504	0.896309	Ortholog(s) have enzyme activator activity and role in chromosome segregation
MCM1	orf19.7025	orf19.7025	48.2126	58.9346	67.2395	48.6606	0.113289	0.923953	Transcription factor; regulator of hyphal growth; may act with Wor1p; canonical and non-canonical binding sites; MADS domain DNA-binding motif; similar to S. cerevisiae Mcm1p; greater expression in white than opaque cells; intron in 5'-UTR
CRH12	orf19.3966	orf19.3966	49.5067	31.3448	43.899	43.9185	0.119234	0.877432	CRH family cell wall protein; transcript regulated by Nrg1 and Tup1; alkaline induced by Rim101; repressed during cell wall regeneration; flow model biofilm induced
FGR17	orf19.5729	orf19.5729	4.3556	3.74065	4.77874	4.05981	0.126556	0.909669	Putative DNA-binding transcription factor; has zinc cluster DNA-binding motif; lacks an ortholog in S. cerevisiae; transposon mutation affects filamentous growth; Hap43p-repressed gene
ZCF14	orf19.2647	orf19.2647	3.15705	4.38511	2.94434	5.30738	0.129719	0.914474	Putative Zn(II)2Cys6 transcription factor; caspofungin induced
KIC1	orf19.191	orf19.191	33.4145	34.7681	42.4977	32.1212	0.130137	0.865372	Member of the GCK-III subfamily of eukaryotic Ste20p kinases; in RAM cell wall integrity signaling network; role in cell separation, azole sensitivity; required for hyphal growth; constitutive expression is MTL, white-opaque independent
TUS1	orf19.6842	orf19.6842	32.324	32.1268	34.2208	36.3604	0.131087	0.86892	Putative guanine nucleotide exchange factor; induced by Mnl1 under weak acid stress; Spider biofilm induced
SRB8	orf19.736	orf19.736	9.34151	9.87469	10.6103	10.4587	0.132801	0.856639	Putative RNA polymerase II mediator complex subunit; early-stage flow model biofilm induced
C4_02670W_A	orf19.2733	orf19.2730,orf19.10244	13.2866	11.1533	13.5399	13.4163	0.141381	0.864802	Putative subunit of phosphatidylinositol 3-kinase complexes I and II; transcription is activated in the presence of elevated CO2
FCR3	orf19.3193	orf19.3193	36.1374	42.6241	43.2474	43.7404	0.143323	0.842045	bZIP transcription factor; ortholog of S. cerevisiae Yap3; partially complements fluconazole sensitivity of S. cerevisiae pdr1 pdr3; Hap43-induced; required for yeast cell adherence to silicone substrate; flow model biofilm repressed
CTA7	orf19.4288	orf19.4288	21.231	25.9011	28.1172	24.0689	0.146957	0.842531	Zn(II)2Cys6 transcription factor; activates transcription in 1-hybrid assay in S. cerevisiae; has similarity to S. cerevisiae Stb4
PBS2	orf19.7388	orf19.7388	176.02	139.999	139.268	212.788	0.155791	0.84497	MAPK kinase (MAPKK); role in osmotic and oxidative stress responses, oxidative stress adaptation; required for stress regulation of Hog1p localization and activity; functional homolog of S. cerevisiae Pbs2p
TIP120	orf19.6729	orf19.6729	24.4786	27.1588	29.6803	27.971	0.158938	0.826764	Protein similar to human CAND1 (Cullin-Associated Nedd8-Dissociated) protein involved in regulation of SCF complexes; binds unnedddylated cullin Cdc53; mutants are viable
SKN7	orf19.971	orf19.971	16.3096	15.0892	18.7599	16.3397	0.160746	0.894091	Putative homolog of S. cerevisiae Skn7p, which is predicted to be a response regulator protein in a phosphorelay signal transduction pathway; required for normal hydrogen peroxide resistance
CKB1	orf19.2102	orf19.2102	100.609	86.1373	86.4932	122.613	0.163157	0.817403	Regulatory subunit of protein kinase CK2 (casein kinase II), beta subunit; null mutants are hypersensitive to caspofungin and hydrogen peroxide medium
HEX1	orf19.6673	orf19.6673	22.6474	29.5025	36.5003	22.2105	0.170961	0.811603	Beta-N-acetylhexosaminidase/chitobiase, highly glycosylated enzyme that is secreted to the periplasm and culture medium; required for full virulence; may have role in carbon or nitrogen scavenging; possibly an essential gene (UAU1 method)
CAS5	orf19.4670	orf19.4670	107.985	81.3079	91.8065	121.366	0.171398	0.817608	Transcription factor involved in regulation of cell wall homeostasis, adherence, stress response; mutants have reduced CFU in mice, hyphal defect in C. elegans infection; Spider biofilm induced
C3_07490W_A	orf19.6739	orf19.6736	54.6672	57.5179	71.3687	55.5627	0.178168	0.796908	Ortholog(s) have phosphopentomutase activity and role in guanosine catabolic process, inosine catabolic process, purine ribonucleoside salvage
LYS144	orf19.5380	orf19.5380	13.2931	12.3061	13.921	15.0657	0.179287	0.795041	Zn(II)2Cys6 transcription factor; has similarity to S. cerevisiae Lys14, involved in the regulation of lysine biosynthesis genes
CR_00340C_A	orf19.7499.1	orf19.7497	546.882	311.516	584.112	394.444	0.189008	0.834378	Ortholog of C. parapsilosis CDC317 : CPAR2_800380, Candida tenuis NRRL Y-1498 : CANTEDRAFT_114079, Pichia stipitis Pignal : psti_CGOB_00127 and Candida orthopsilosis Co 90-125 : CORT_0A00460
NUP84	orf19.1298	orf19.1298	44.3454	46.2461	35.0144	68.4148	0.191196	0.784898	Ortholog(s) have structural constituent of nuclear pore activity
C2_01650W_A	orf19.1476	orf19.1476	4.46238	4.39335	8.04771	2.0694	0.192114	0.857043	Ortholog(s) have mRNA (N6-adenosine)-methyltransferase activity, role in mRNA methylation, meiotic cell cycle, negative regulation of pseudohyphal growth and RNA N6-methyladenosine methyltransferase complex localization
REI1	orf19.59	orf19.59	202.178	151.925	146.321	258.551	0.193294	0.794183	Putative cytoplasmic pre-60S factor; Hap43-induced; repressed by prostaglandins
RIM15	orf19.7044	orf19.7044	32.7842	41.255	44.6893	40.0932	0.195477	0.786318	Ortholog(s) have protein serine/threonine kinase activity
HAP43	orf19.681	orf19.681	229.278	206.109	258.75	240.525	0.197537	0.792939	CCAAT-binding factor-dependent transcription factor; repressor; also called CAP2; required for low iron response; similar to bZIP transcription factor AP-1; repressed by Sfu1; ciclopirox olamine induced; rat catheter, Spider biofilm induced
CR_05200C_A	orf19.556	orf19.5571	187.464	234.876	209.97	274.615	0.198346	0.772119	Protein of unknown function; regulated by Ssn6
CCW14	orf19.1969	orf19.1969	77.329	80.1388	78.5215	103.281	0.207316	0.757148	Putative mannoprotein of cell wall with role in response to stress; increased mRNA abundance observed in cyr1 homozygous mutant (hyphal or yeast-form cells) and in ras1 homozygous mutant (yeast-form cells)
C3_00270C_A	orf19.5442	orf19.12893	29.0224	36.0673	35.8321	39.3692	0.20833	0.760288	Ortholog of C. dubliniensis CD36 : Cd36_80240, C. parapsilosis CDC317 : CPAR2_504040, Candida tenuis NRRL Y-1498 : CANTEDRAFT_130872 and Debaryomyces hansenii CBS767 : DEHA2C06006g
HOC1	orf19.3445	orf19.10949	26.744	43.8879	39.7285	42.0457	0.211325	0.755403	Protein with similarity to mannosyltransferases; similar to S. cerevisiae Hoc1p and C. albicans Och1p
ASG1	orf19.166	orf19.166	26.9751	27.4138	22.6132	40.3801	0.211887	0.753815	Gal4p family zinc-finger transcription factor with similarity to S. cerevisiae Asg1p
MID1	orf19.3212	orf19.3212	27.0228	27.203	28.6303	34.4877	0.219073	0.736055	Putative stretch-activated Ca2+ channel of the high affinity calcium uptake system; role in thigmotropism; decreased transcription is observed upon fluphenazine treatment or in an azole-resistant strain with CDR1 and CDR2 overexpression
CR_04390C_A	orf19.529	orf19.529	22.2064	30.2091	33.5182	27.5407	0.220209	0.732199	Ortholog of C. dubliniensis CD36 : Cd36_29750, C. parapsilosis CDC317 : CPAR2_205260, Candida tenuis NRRL Y-1498 : CANTEDRAFT_91782 and Debaryomyces hansenii CBS767 : DEHA2F19294g
SSN6	orf19.6798	orf19.6798	210.916	197.417	237.959	241.927	0.232945	0.744094	Functional homolog of S. cerevisiae Cyc8/Ssn6; hyphal growth regulator; repressed during hyphal growth; Ssn6 and Tup1 regulate distinct sets of genes; overexpression or mutation causes avirulence in mouse IV infection; TPR motifs
FUN31	orf19.7451	orf19.7451	170.485	158.416	155.61	231.396	0.234704	0.745236	Putative PAS kinase involved in cell wall damage response; similar to S. cerevisiae Psk1p, a putative serine/threonine protein kinase; induced by Mnl1 under weak acid stress; rat catheter and Spider biofilm induced
HST7	orf19.469	orf19.469	72.5658	58.7572	68.4154	86.3161	0.236647	0.70981	MAP kinase kinase involved in mating and hyphal growth signal transduction pathways; phosphorylates Cek1p; wild-type virulence in mouse systemic infection; functional homolog of S. cerevisiae Ste7p; mutants are hypersensitive to caspofungin
KIS1	orf19.4084	orf19.4084	165.098	126.286	163.41	179.973	0.236897	0.75768	Snf1p complex scaffold protein; similar to S. cerevisiae Gal83p and Sip2p with regions of similarity to Sip1p (ASC and KIS domain); interacts with Snf4p; mutants are hypersensitive to caspofungin and hydrogen peroxide; Hap43p-repressed gene
STB5	orf19.3308	orf19.3308	12.4937	13.6251	19.1083	11.7007	0.238264	0.723819	Putative transcription factor with zinc cluster DNA-binding motif; has similarity to S. cerevisiae Stb5p; Hap43p-repressed gene
LRO1	orf19.6018	orf19.6018	64.4558	67.3866	72.0362	84.0945	0.24394	0.70356	Acyltransferase that catalyzes diacylglycerol esterification of phospholipids; role in lipid storage, triglyceride biosynthesis; flow model biofilm repressed
KRE5	orf19.290	orf19.290	11.2114	22.7272	20.6781	19.6147	0.247594	0.794183	UDP-glucose:glycoprotein glucosyltransferase; 1,6-beta-D-glucan biosynthesis, hyphal growth, virulence in mouse IV model; partially complements S. cerevisiae kre5 mutant defects; flow biofilm repressed, Bcr1-repressed in RPMI a/a biofilms
C3_04310C_A	orf19.5874	orf19.5874	1.20249	0.152214	1.05383	0.555077	0.248101	1	Ortholog of C. dubliniensis CD36 : Cd36_84250, C. parapsilosis CDC317 : CPAR2_806160, Candida tenuis NRRL Y-1498 : CANTEDRAFT_137075 and Debaryomyces hansenii CBS767 : DEHA2F11462g
UBR1	orf19.2695	orf19.2695	50.515	49.6841	54.6234	64.7105	0.252134	0.706858	Protein similar to S. cerevisiae Ubr1p ubiquitin-protein ligase; transposon mutation affects filamentous growth; Spider biofilm induced
C1_06640C_A	orf19.6247.1	orf19.6245	3864.03	3258.37	4483.1	4003.29	0.252788	0.687929	Ortholog(s) have protein transmembrane transporter activity and role in mitochondrial outer membrane translocase complex assembly, protein targeting to mitochondrion
C2_00230W_A	orf19.2110	orf19.2105	27.286	25.8541	36.12	27.2709	0.254472	0.681228	Ortholog(s) have arginyltransferase activity and role in protein arginylation
ECM17	orf19.4099	orf19.5477,orf19.11580	36.6054	45.791	46.387	52.4843	0.26297	0.680609	Putative sulfite reductase beta subunit; role in cell wall biogenesis; regulated by Tsa1/Tsa1B in H2O2 stress; Gcn4-regulated; Tbf1-activated; Hap43-repressed; Spider, flow, F-12/CO2 model biofilm induced
CR_10000C_A	orf19.7576	orf19.7576	53.0683	53.108	63.1955	65.0603	0.272562	0.733688	Ortholog of S. pombe atl1 alkyltransferase-like protein; mutants are viable; Spider biofilm induced
CKA1	orf19.7652	orf19.7652	102.454	105.219	114.695	136.239	0.272996	0.655225	Putative alpha subunit (catalytic subunit) of protein kinase CK2; Cka1p and Cka2p have a common target with respect to fluconazole resistance; synthetically lethal with CKA2; flucytosine induced
BMT5	orf19.1464	orf19.1464	51.4598	44.9579	57.0602	59.527	0.274039	0.646335	Putative beta-mannosyltransferase involved in beta-1,2-mannosylation of phospholipomannan; 9-member family includes Bmt1, Bmt2, Bmt3, and Bmtp with roles in mannosylation of cell wall phosphopeptidomannan; Spider biofilm induced
IHD1	orf19.5760	orf19.5760	70.2006	65.4207	84.4599	80.0768	0.278825	0.638867	GPI-anchored protein; alkaline, hypha-induced; regulated by Nrg1, Rfg1, Tup1 and Tsa1, Tsa1B in minimal media at 37; oralpharyngeal candidasis induced ; Spider biofilm induced; regulated in Spider biofilms by Tec1, Efg1, Ndt80, Rob1, Brg1
VPS15	orf19.130	orf19.130	7.30466	9.03306	10.259	9.72657	0.29075	0.618702	Protein involved in retrograde endosome-to-Golgi protein transport; required for normal virulence
UGA33	orf19.7317	orf19.7317	12.0376	18.645	15.3361	22.4344	0.299839	0.651985	Zinc-finger transcription factor; similar to S. cerevisiae Uga3 which regulates gamma-aminobutyrate metabolism gene expression; required for yeast cell adherence to silicone substrate; rat catheter biofilm induced
PKH2	orf19.5224	orf19.5224	33.676	45.1174	48.6516	48.5316	0.302633	0.61079	Putative serine/threonine protein kinase; predicted role in sphingolipid-mediated signaling pathway that controls endocytosis; mRNA binds She3 and is localized to hyphal tips
C2_04520C_A	orf19.4498	orf19.449	39.5753	44.1966	36.2731	67.3437	0.30672	0.628481	Ortholog of C. dubliniensis CD36 : Cd36_19120, C. parapsilosis CDC317 : CPAR2_103880, Candida tenuis NRRL Y-1498 : CANTEDRAFT_115581 and Debaryomyces hansenii CBS767 : DEHA2F08426g
FRE3	orf19.1270	orf19.1270	6.79407	8.60766	10.2369	8.95464	0.317379	0.634961	Protein with similarity to ferric reductase Fre10p; possibly an essential gene, disruptants not obtained by UAU1 method
C1_09790C_A	orf19.4844	orf19.12307	68.4008	52.1722	68.2061	84.198	0.337995	0.554453	Ortholog(s) have ATP-dependent 3'-5' RNA helicase activity, RNA binding, polynucleotide adenylyltransferase activity, protein binding, bridging activity
PUF3	orf19.1795	orf19.1795	22.1765	20.3779	26.4879	27.5351	0.344268	0.534087	RNA-binding protein involved in regulation of mitochondrial biogenesis
SNT1	orf19.5241	orf19.12706	103.177	101.983	122.94	139.989	0.357931	0.547664	Ortholog of S. cerevisiae Snt1; an NAD-independent histone deacetylase; heterozygous transposon mutation affects filamentous growth; null mutants are viable
C7_01490W_A	orf19.6580	orf19.6578	141.919	118.48	110.677	223.438	0.359625	0.541223	Protein of unknown function; Spider biofilm induced
C4_07130W_A	orf19.3091	orf19.3088	50.0653	40.308	48.982	67.0103	0.360061	0.561051	Protein of unknown function; repressed during core stress response
HOS2	orf19.5377	orf19.12832	14.0267	14.4102	16.8355	20.1165	0.377891	0.547664	Putative protein deacetylase, deacetylates tubulin in vitro; genetic evidence suggests that Set3p and Hos2p function together as a complex involved in regulation of white-opaque switching, filamentous growth and virulence
RGT1	orf19.2747	orf19.10261	24.0507	23.0534	29.3449	32.4028	0.390531	0.469117	Zn(II)2Cys6 transcription factor; transcriptional repressor involved in the regulation of glucose transporter genes; ortholog of S. cerevisiae Rgt1; mutants display decreased colonization of mouse kidneys
AHR1	orf19.7381	orf19.7381	31.6371	31.2242	40.9931	41.6439	0.394615	0.473559	Zn(II)2Cys6 transcription factor; involved in regulation of adhesion genes; involved in white-opaque switch; forms complex with Mcm1; mutant is sensetive to 5-fluorocytosine and lithium chloride; Spider biofilm induced
HWP2	orf19.3380	orf19.3380	0.04677	0.372977	0.215187	0.340032	0.403535	1	GPI-anchored, glycosylated cell wall protein; required for biofilm formation, adhesion, filamentous growth on some media; expressed in hyphae; mutant delayed in virulence; regulated by Efg1, Tup1; similar to Hwp1 and Rbt1 domains
C5_03690W_A	orf19.6681	orf19.1124	25.5062	24.9108	34.5973	32.1426	0.404639	0.470622	Protein of unknown function; Spider biofilm induced
C7_01830W_A	orf19.6537	orf19.6530	5.7926	8.76835	14.9914	4.28938	0.405061	0.694444	Ortholog(s) have role in chromosome segregation and nuclear MIS12/MIND complex, spindle pole localization
TEL1	orf19.5580	orf19.13026	4.87235	7.22836	7.71869	8.32525	0.406937	0.647356	Ortholog(s) have protein serine/threonine kinase activity, telomeric DNA binding activity
CDA2	orf19.7503	orf19.7503	3.14696	2.90464	4.42414	3.60137	0.407278	0.722233	Putative chitin deacetylase; transcription is positively regulated by Tbf1p
WOR2	orf19.5992	orf19.5992	1569.28	1254.12	2004.97	1750.19	0.411439	0.492908	Zn(II)2Cys6 transcription factor; regulator of white-opaque switching; required for maintenance of opaque state; Hap43-induced
DAL7	orf19.5023	orf19.5023	2.49183	4.9679	5.32293	4.67286	0.422198	0.639092	Putative allantoate permease; mutant is viable
C4_05890W_A	orf19.1276	orf19.1276	22.9851	15.5338	27.4838	24.2323	0.425048	0.612821	Protein with a selenoprotein domain and a thioredoxin-like fold domain; similar to S. cerevisiae Vhs3p, which is a putative phosphopantothenoylcysteine decarboxylase
CKB2	orf19.4297	orf19.4297	59.4028	60.8272	73.7573	88.1866	0.429698	0.426197	Regulatory subunit of protein kinase CK2 (casein kinase II), beta' subunit; null mutants are hypersensitive to caspofungin
C2_08090W_A	orf19.2177	orf19.217	38.6655	29.9797	62.523	30.9701	0.445701	0.725348	Sef1p-, Sfu1p-, and Hap43p-regulated gene; overlaps IFM3/orf19.2176
C3_01190C_A	orf19.3158	orf19.173	35.4697	25.263	33.4244	50.5132	0.466844	0.36233	Ortholog of S. cerevisiae : RMD1, C. glabrata CBS138 : CAGL0M10483g, C. dubliniensis CD36 : Cd36_81090, C. parapsilosis CDC317 : CPAR2_101950 and Candida tenuis NRRL Y-1498 : CANTEDRAFT_109620
C1_13880C_A	orf19.5026	orf19.5026	258.961	198.878	266.265	366.887	0.467711	0.432355	C2H2 transcription factor; Spider biofilm induced
WSC1	orf19.5867	orf19.5867	143.425	131.158	167.098	213.266	0.470135	0.366302	Putative cell wall component; transcript upregulated in cyr1 mutant (yeast or hyphae); Spider and flow model biofilm induced
C3_05420W_A	orf19.6980	orf19.6980	12.6053	17.1577	18.0511	23.3099	0.474749	0.380715	Ortholog(s) have cell periphery, cellular bud neck localization
VPS34	orf19.6243	orf19.6243	6.89263	6.83884	9.46315	9.63554	0.475988	0.366598	Autophosphorylated class III phosphatidylinositol 3-kinase; required for normal vesicle transport, hyphal growth, fibroblast adherence, virulence in mouse systemic infection; growth-regulated; caspofungin and hydrogen peroxide sensitivity
DUR35	orf19.5915	orf19.5915	1.70165	2.31969	2.7603	2.85497	0.481678	0.598335	Putative urea transporter
PHO23	orf19.1759	orf19.1759	24.0384	24.5833	33.8064	34.462	0.489619	0.324913	Ortholog(s) have methylated histone binding activity
MRR1	orf19.7372	orf19.7372	14.3202	15.8359	16.8338	25.822	0.500291	0.316422	Putative Zn(II)2Cys6 transcription factor; regulator of MDR1 transcription; gain-of-function mutations cause upregulation of MDR1 (a plasma membrane multidrug efflux pump) and multidrug resistance; Hap43-induced
SPT7	orf19.7572	orf19.7572	31.4981	36.8196	40.9126	55.9626	0.503868	0.335398	Putative SAGA transcriptional regulatory complex subunit; mutation confers hypersensitivity to toxic ergosterol analog, and to amphotericin B
SWI4	orf19.4545	orf19.4545	29.5	35.0355	40.2369	51.4991	0.507394	0.314378	Putative component of the SBF transcription complex involved in G1/S cell-cycle progression; periodic mRNA expression, peak at cell-cycle G1/S phase; predicted, conserved MBF binding sites upstream of G1/S-regulated genes
PZF1	orf19.4125	orf19.4125	57.9213	42.1291	46.6013	95.6973	0.508194	0.332352	C2H2 transcription factor; Hap43-induced; rat catheter and Spider biofilm induced
MSN4	orf19.4752	orf19.4752,orf19.12215	35.7426	35.0046	53.4616	48.2143	0.523232	0.298028	Zinc finger transcription factor; similar to S. cerevisiae Msn4, but not a significant stress response regulator in C. albicans; partly complements STRE-activation defect of S. cerevisiae msn2 msn4 double mutant; flow model biofilm induced
SEF1	orf19.3753	orf19.3753	206.062	157.985	189.24	335.198	0.526648	0.36691	Zn2-Cys6 transcription factor; regulates iron uptake; negatively regulated by Sfu1p, positively regulated by Tbf1; promotes virulence in mice; mutants display decreased colonization of mouse kidneys; Spider biofilm induced
C1_08680C_A	orf19.4726	orf19.12189	32.0467	44.4212	59.8539	51.0063	0.535816	0.332076	Ortholog(s) have 1-phosphatidylinositol 4-kinase activator activity, calcium ion binding activity
BCR1	orf19.723	orf19.723	233.199	176.44	205.848	389.509	0.5394	0.343567	Transcription factor; regulates a/alpha biofilm formation, matrix, cell-surface-associated genes; confers adherence, impermeability, impenetrability, fluconazole resistance; Tup1/Tec1/Mnl1-regulated; mRNA binds She3; Spider biofilm induced
ZCF24	orf19.4524	orf19.4524	6.63842	11.1596	12.3695	13.7322	0.552425	0.909341	Predicted Zn(II)2Cys6 transcription factor; caspofungin induced; Hap43-repressed
C5_02350C_A	orf19.4243	orf19.4243	13.9871	13.0134	17.4292	22.3154	0.557774	0.400703	Ortholog(s) have ubiquitin binding activity
C5_04410C_A	orf19.3928	orf19.1141	21.8677	17.2607	31.3209	26.2944	0.558235	0.300542	Putative transcription factor with zinc finger DNA-binding motif
C1_04510W_A	orf19.6845	orf19.6845	24.7279	20.9803	29.651	37.7143	0.559552	0.242629	Putative transcription factor with bZIP DNA-binding motif; rat catheter biofilm induced
CHK1	orf19.896	orf19.896	12.0255	12.0183	12.7218	22.7196	0.559774	0.265968	Histidine kinase; 2-component signaling, cell wall synthesis; hyphal growth defect; avirulent in mouse, not rat vaginal infection; phagocytosis rate increased; Spider biofilm induced; required for RPMI biofilm; Bcr1-induced in a/a biofilm
FGR15	orf19.2054	orf19.2054	30.439	24.7302	29.6951	51.6439	0.560083	0.263763	Putative transcription factor with zinc finger DNA-binding motif; lacks an ortholog in S. cerevisiae; transposon mutation affects filamentous growth; caspofungin induced; mutation causes marginal increase in caspofungin sensitivity
PDE2	orf19.2972	orf19.10489	151.954	121.504	161.408	241.781	0.560133	0.289928	High affinity cyclic nucleotide phosphodiesterase; moderates signaling by cAMP; required for virulence, switching, cell wall, hyphal, not pseudohyphal growth; expressed shortly after hyphal induction; rat catheter and Spider biofilm induced
KNS1	orf19.4979	orf19.4979	61.0044	52.5418	74.7266	93.2554	0.565027	0.248011	Protein kinase involved in negative regulation of PolIII transcription; effector kinase of the TOR signaling pathway, phosphorylates Rpc53p to regulate ribosome and tRNA biosynthesis; Spider and flow model biofilm induced
CFL2	orf19.1264	orf19.1264	1.03109	4.1643	1.85974	5.87162	0.573487	0.838835	Oxidoreductase; iron utilization; Sfu1/Sef1/Hap43/Nrg1/Tup1/Rim101 regulated; alkaline/low iron/fluphenazine/ciclopirox olamine, flucytosine, fluconazole, Spider/flow model/rat catheter biofilm induced; caspofungin/amphotericin B repressed
THI20	orf19.889	orf19.889	12.1849	12.9706	17.9348	19.554	0.575589	0.269801	Putative trifunctional enzyme of thiamine biosynthesis, degradation and salvage; Spider biofilm induced
C1_13490C_A	orf19.4981	orf19.4981	7.47164	8.86376	11.9324	12.5203	0.58199	0.269407	Ortholog(s) have role in cellular calcium ion homeostasis, regulation of G0 to G1 transition
BEM2	orf19.6573	orf19.6573	30.0979	33.4959	41.0384	54.3561	0.585022	0.263675	Putative Rho1p GTPase activating protein (GAP); serum-induced transcript; Spider biofilm induced; flow model biofilm repressed
RIM9	orf19.101	orf19.101	12.2665	10.8691	17.1907	17.654	0.590827	0.331755	Protein required for alkaline pH response via the Rim101 signaling pathway; ortholog of S. cerevisiae Rim9 and A. nidulans palI; Spider biofilm induced
ARR3	orf19.3122	orf19.3122	49.3517	50.3584	80.5922	70.0837	0.595638	0.204032	Ortholog of S. cerevisiae Arr3; arsenite transporter of the plasma membrane required for resistance to arsenic compounds; benomyl-induced; Gcn4-regulated; Hap43-repressed; mutant is viable; Spider biofilm induced
CR_04970C_A	orf19.634	orf19.6348	0.531606	0.471044	1.08706	0.429437	0.596927	1	Ortholog of C. dubliniensis CD36 : Cd36_30370, Candida tropicalis MYA-3404 : CTRG_00536 and Candida albicans WO-1 : CAWG_01831
C1_12630C_A	orf19.6360	orf19.6358	39.8429	29.531	37.4701	68.2171	0.607336	0.248011	Protein involved in pre-mRNA splicing; Spider biofilm induced
TEC1	orf19.5908	orf19.5908	295.471	282.073	310.012	571.894	0.610694	0.266354	TEA/ATTS transcription factor; white cell pheromone response, hyphal gene regulation; required for Spider and RPMI biofilm formation; regulates BCR1; Cph2 regulated transcript; alkaline, rat catheter, Spider, flow model biofilm induced
NBN1	orf19.878	orf19.878	32.1861	26.4068	48.9704	40.5824	0.612012	0.214983	Subunit of the NuA4 histone acetyltransferase complex; Plc1p-regulated
FAD2	orf19.118	orf19.118	256.057	261.269	328.123	463.551	0.613834	0.240004	Delta-12 fatty acid desaturase, involved in production of linoleic acid, which is a major component of membranes
SPT20	orf19.422	orf19.422	16.6192	24.4583	32.5876	30.2879	0.614152	0.185666	Putative transcription factor; downregulated upon adherence to polystyrene; flucytosine repressed
ZCF7	orf19.1685	orf19.1685	9.16463	10.4929	16.2663	13.9748	0.621426	0.272481	Predicted Zn(II)2Cys6 transcription factor; mutant shows reduced colony wrinkling on Spider medium and is unable to utilize mannitol as a carbon source; mutants have increased colonization of mouse kidneys
C1_13530W_A	orf19.4984	orf19.4984	27.8019	27.8781	42.1706	43.5093	0.621796	0.172962	Pseudogene; has lysine motifs associated with chitin binding
HYR3	orf19.575	orf19.575	33.143	31.9331	57.0841	43.0976	0.62242	0.210073	Putative GPI-anchored adhesin-like protein; similar to Hyr1p induced in high iron; clade-specific repeat variation
GIS2	orf19.3182	orf19.3182	367.232	349.93	463.471	640.69	0.622579	0.210073	Translational activator for mRNAs with internal ribosome entry sites; induced in high iron; repressed by yeast-hypha switch; null exhibits sensitivity to sorbitol, 5-fluorocytosine, and cold temperatures; Spider biofilm repressed
C1_05540C_A	orf19.411	orf19.411	194.952	140.706	152.377	370.229	0.638732	0.226616	Protein similar to GTPase regulators; induced in low iron; transcript activated by Mnl1 under weak acid stress; Hap43-, Sfu1- and Sef1-regulated; flow model biofilm induced, Spider biofilm induced
RAX1	orf19.5903	orf19.5903	72.6435	79.0166	114.157	123.746	0.649533	0.171306	Protein with a predicted role in bud site selection; hypha-induced expression; Spider biofilm induced
CR_08940W_A	orf19.7291	orf19.7291	47.2638	53.5849	66.2956	92.4863	0.654853	0.145077	Ortholog(s) have tRNA (adenine-N1-)-methyltransferase activity, role in tRNA methylation and nucleus, tRNA (m1A) methyltransferase complex localization
C2_10170C_A	orf19.1764	orf19.9326	151.501	117.543	186.329	238.856	0.660249	0.169923	Protein of unknown function; rat catheter and Spider biofilm induced
MAC1	orf19.7068	orf19.7068	13.2921	16.5656	22.7058	24.5304	0.661788	0.179845	Copper fist transcription factor; regulator of CTR1 copper transporter; induces CTR1 in low-copper conditions; required for copper regulation of SOD1 and SOD3; Spider biofilm induced
EMC9	orf19.1907	orf19.1907	74.3718	73.138	105.986	127.44	0.662157	0.177374	Ortholog of S. cerevisiae Nnf2; possible role in chromosome segregation; mutants are viable, induced during the mating process
SLM2	orf19.3505	orf19.10999	38.7958	42.0047	65.5646	63.5921	0.676687	0.142877	Ortholog(s) have role in TOR signaling, actin filament bundle assembly, eisosome assembly, endosomal transport, establishment or maintenance of actin cytoskeleton polarity, protein localization to plasma membrane, regulation of cell growth
RAD18	orf19.3407	orf19.3407	14.7987	15.0181	27.6426	20.0265	0.676927	0.200061	Putative transcription factor with zinc finger DNA-binding motif; Hap43p-repressed gene
HSM3	orf19.1331	orf19.1331	26.3209	38.7272	65.1681	39.2293	0.682509	0.147602	Ortholog(s) have role in mismatch repair, proteasome regulatory particle assembly and cytosol, nucleus, proteasome regulatory particle, base subcomplex localization
CR_04120C_A	orf19.496	orf19.4972	10.8903	14.4948	21.7758	18.9679	0.6826	0.141692	Ortholog(s) have DNA-dependent ATPase activity, dinucleotide insertion or deletion binding, guanine/thymine mispair binding activity, role in mismatch repair, mitochondrial DNA repair and mitochondrion localization
TAC1	orf19.3188	orf19.3188	17.2568	21.5826	25.9709	36.8147	0.692912	0.135816	Zn(2)-Cys(6) transcriptional activator of drug-responsive genes (CDR1 and CDR2); binds DRE element; gene in zinc cluster region near MTL locus; resequencing indicates that TAC1 spans orf19.3188 and orf19.3189; Spider biofilm induced
ZCF25	orf19.4568	orf19.4568	8.20788	12.6566	17.6968	16.2316	0.701443	0.137484	Putative Zn(II)2Cys6 transcription factor
ULP2	orf19.4353	orf19.4353	33.3052	24.3322	40.4787	53.2841	0.702008	0.119182	SUMO deconjugation enzyme; removes the small ubiquitin-like modifier (SUMO) from proteins; Spider biofilm induced
MDM34	orf19.1826	orf19.1826	293.877	253.691	491.555	412.273	0.72301	0.158296	Putative zinc finger transcription factor; macrophage-downregulated; flow model biofilm induced; flow model and Spider biofilm induced
CR_07480W_A	orf19.6117	orf19.2612	158.174	93.4363	166.577	254.627	0.743329	0.125352	S. pombe ortholog SPAC5D6.04 is a predicted auxin family transmembrane transporter; ketoconazole and hypoxia induced
C1_06320W_A	orf19.177	orf19.13655	14.9587	12.1103	20.507	24.95	0.74786	0.0931294	Has domain(s) with predicted phosphatidylinositol binding activity and role in cell communication
ZCF30	orf19.5251	orf19.5251	38.904	38.2811	50.6	79.2622	0.750588	0.106476	Predicted Zn(II)2Cys6 transcription factor; mutants are viable; repressed by fluphenazine; Spider biofilm induced
ADA2	orf19.2331	orf19.2331	47.4528	50.6223	84.5861	81.7096	0.761792	0.0785939	Zinc finger and homeodomain transcriptional coactivator; role in cell wall integrity and in sensitivity to caspofungin; required for the normal transcriptional response to caspofungin; required for yeast cell adherence to silicone substrate
FGR27	orf19.6680	orf19.6680	40.4265	40.6618	57.9366	79.7007	0.763306	0.0884968	Zn(II)2Cys6 transcription factor; transposon mutation affects filamentous growth; required for yeast cell adherence to silicone substrate; Spider biofilm induced
STE11	orf19.844	orf19.844	39.2298	36.2359	68.184	60.8166	0.773486	0.0843132	Protein similar to S. cerevisiae Ste11p; mutants are sensitive to growth on H2O2 medium
C5_01260W_A	orf19.1943	orf19.194	4.4067	5.30266	6.54975	10.1959	0.78634	0.14692	Ortholog of C. parapsilosis CDC317 : CPAR2_302610, C. dubliniensis CD36 : Cd36_51070, Candida orthopsilosis Co 90-125 : CORT_0E04770 and Spathaspora passalidarum NRRL Y-27907 : SPAPADRAFT_50634
C5_02690W_A	orf19.4287	orf19.4292	19.6685	23.3931	40.1857	34.2294	0.789195	0.085542	Putative oxidoreductase; Hap43-repressed gene; clade-associated gene expression
MRR2	orf19.6182	orf19.6182	20.9734	22.1543	39.8417	35.2052	0.799176	0.215837	Zn(II)2Cys6 transcription factor involved in regulation of multidrug resistance via control of CDR1 expression; mutants display decreased colonization of mouse kidneys; required for yeast cell adherence to silicone substrate
PPG1	orf19.3774	orf19.11256	21.3024	22.3711	38.0291	37.9676	0.799177	0.085542	Protein phosphatase of the Type 2A-related family (serine/threonine-specific) involved in control of filamentous growth and virulence
TEA1	orf19.6985	orf19.6985	17.4711	16.3594	22.5943	36.3896	0.801996	0.0676465	Putative transcription factor with zinc cluster DNA-binding motif; has similarity to S. cerevisiae Tea1p; Hap43p-repressed gene
ZCF3	orf19.1168	orf19.1168	410.346	485.888	655.254	918.217	0.812004	0.0799446	Zn(II)2Cys6 domain transcription factor; required for filamentous growth, resistance to rapamycin and flucytosine; possibly an essential gene, disruptants not obtained by UAU1 method; Hap43-repressed; Spider and flow model biofilm induced
PRM9	orf19.2508	orf19.2508	1.91488	0.989764	1.89666	3.22263	0.817581	0.412173	Protein described a similar to S. cerevisiae Prm9; not the ortholog though; mutant is viable
ZCF26	orf19.4573	orf19.4573	6.65014	11.5567	17.9866	14.4504	0.83316	0.075732	Zn2-Cys6 transcription factor of unknown function; induced by alpha pheromone in SpiderM medium
ZCF1	orf19.255	orf19.255	41.5785	34.2199	63.8451	71.2551	0.833789	0.0626428	Zn(II)2Cys6 transcription factor; transcript regulated during hypha formation; 5'-UTR intron; mutants show decreased colonization of mouse kidneys; flow model biofilm induced; Spider biofilm induced
EAP1	orf19.1401	orf19.1401	3.93968	3.114	7.08977	5.8463	0.87495	0.47657	GPI-anchored cell wall adhesin; Efg1-regulated; mutant suppresses cell adhesion, filamentation, invasive growth defects of S. cerevisiae flo8 or flo11 mutant; biofilm induced; required for biofilm formation; Bcr1-repressed in a/a biofilms
ARO80	orf19.3012	orf19.10530	9.1042	10.6164	15.4738	20.9491	0.885144	0.0441044	Zn(II)2Cys6 transcription factor; transcriptional activator of aromatic amino acid catabolism; regulator of aromatic alcohol biosynthesis via the Ehrlich pathway; mutant is viable
RIM101	orf19.7247	orf19.7247	927.404	584.116	1414.9	1383.7	0.888704	0.0654397	Transcription factor; alkaline pH response; required for alkaline-induced hyphal growth; role in virulence in mice; activated by C-terminal proteolytic cleavage; mediates both positive and negative regulation; Spider biofilm induced
C4_00260W_A	orf19.5651	orf19.5651	56.303	55.68	119.684	88.0581	0.891514	0.0450317	Ortholog(s) have histone demethylase activity (H3-dimethyl-K4 specific), histone demethylase activity (H3-monomethyl-K4 specific), histone demethylase activity (H3-trimethyl-K4 specific) activity
C7_03850W_A	orf19.7197	orf19.7194	132.796	106.101	122.073	321.588	0.893066	0.0686865	Putative intranuclear transport and DNA replication mediator; heterozygous null mutant exhibits resistance to parnafungin in the C. albicans fitness test; Spider biofilm induced
C4_00640W_A	orf19.4179	orf19.4174	1.08292	0	0.553607	1.45799	0.893415	1	Putative adhesin-like protein
HIT1	orf19.2723	orf19.2723	41.7802	37.0206	41.7241	104.784	0.894694	0.102229	Ortholog of S. cerevisiae Hit1; protein of unknown function required for high temperature growth; flow model biofilm induced; Spider biofilm induced
CYM1	orf19.7410	orf19.7410	55.929	50.3144	71.7395	126.57	0.90038	0.0606411	Putative metalloprotease of the mitochondrial intermembrane space; rat catheter biofilm induced
ARG81	orf19.4766	orf19.4766	24.5452	22.3568	36.65	51.3246	0.907437	0.0375838	Zn(II)2Cys6 transcription factor; required for utilization of ornithine as a nitrogen source and for wild-type resistance to caffeine; required for yeast cell adherence to silicone substrate
ZCF18	orf19.3405	orf19.3405	7.63619	8.65453	17.2264	13.6283	0.921441	0.0815625	Putative Zn(II)2Cys6 transcription factor; heterozygous null mutant displays sensitivity to virgineone and decreased colonization of mouse kidneys
C2_01870C_A	orf19.1496	orf19.1496	7.4779	9.80287	16.3387	16.7155	0.935662	0.0725202	Putative transcription factor with zinc finger DNA-binding motif; Hap43p-repressed gene
PAN3	orf19.4010	orf19.4010	15.921	16.5414	34.1841	28.9502	0.959653	0.0262411	Ortholog(s) have poly(A) binding, poly(A)-specific ribonuclease activity, role in nuclear-transcribed mRNA poly(A) tail shortening, postreplication repair and PAN complex localization
ZCF19	orf19.3876	orf19.3876	0.926358	1.83107	2.67749	2.70547	0.965075	0.310411	Predicted Zn(II)2Cys6 transcription factor
LEU3	orf19.4225	orf19.11700	48.2124	42.0359	74.5659	101.94	0.967746	0.0307021	Zn(II)2Cys6 transcription factor; predicted regulator branched-c ofhain amino acid biosynthesis genes; alkaline induced; induced by Mnl1 under weak acid stress; required for yeast cell adherence to silicone substrate; Spider biofilm induced
ZCF2	orf19.431	orf19.431	85.9458	67.3923	145.742	155.641	0.974879	0.0312583	Zn(II)2Cys6 transcription factor, required for adaptation to reactive sulfur species; regulates sulfite tolerance through expression of SSU1 and CDG1; Hap43-repressed; Spider biofilm induced
C1_03990W_A	orf19.4474	orf19.4474	15.3436	16.7775	23.1561	40.6124	0.989323	0.0474527	Ortholog(s) have proteasome binding activity and role in cellular response to arsenic-containing substance, proteasome-mediated ubiquitin-dependent protein catabolic process
C5_04940W_A	orf19.3982	orf19.3982	2.82599	5.27881	5.85687	10.3038	0.995633	0.109823	Maltase; induced during growth on sucrose; induced by alpha pheromone in SpiderM medium; early-stage flow model biofilm indced
STP4	orf19.909	orf19.909	302.219	119.456	413.712	437.572	1.01351	0.0421234	C2H2 transcription factor; induced in core caspofungin response; colony morphology-related gene regulation by Ssn6; induced by 17-beta-estradiol, ethynyl estradiol; rat catheter and Spider biofilm induced
ECM25	orf19.4958	orf19.4958	5.81159	7.5359	12.2281	14.771	1.01635	0.0474527	Non-essential protein involved in cell morphogenesis
C1_11150W_A	orf19.2301	orf19.2296	16.792	21.8935	46.7234	32.3617	1.03161	0.0525229	Ortholog(s) have role in proteasome regulatory particle assembly and cytosol, nucleus localization
HAL9	orf19.3190	orf19.3190,orf19.10701	20.6886	16.5947	35.0555	41.3769	1.03566	0.0122951	Putative Zn(II)2Cys6 transcription factor; gene in zinc cluster region of Chr. 5; induced by Mnl1 in weak acid; similar to S. cerevisiae Hal9, a putative transcription factor involved in salt tolerance
OPT7	orf19.5673	orf19.5673	5.55304	5.07419	12.4641	9.53234	1.04951	0.0393689	Putative oligopeptide transporter; possibly transports GSH or related compounds; Hog1-induced; expression of OPT6, -7, or -8 does not suppress defect of mutant lacking OPT1-3; Hap43-repressed; F-12/CO2 early biofilm induced
ZCF15	orf19.2753	orf19.2753	18.1643	22.6125	38.588	46.0851	1.05416	0.00818221	Predicted Zn(II)2Cys6 transcription factor of unknown function; rat catheter biofilm induced
HMS1	orf19.921	orf19.921	27.4322	31.1311	53.4921	68.1767	1.05489	0.0114985	hLh domain Myc-type transcript factor; required for morphogenesis induced by elevated temperature or Hsp90 compromise; acts downstream of Pcl1; Spider biofilm induced
PEX14	orf19.1805	orf19.1805	44.3422	48.7965	92.9198	102.343	1.06797	0.00945532	Ortholog(s) have peroxisome matrix targeting signal-1 binding, peroxisome matrix targeting signal-2 binding, protein binding, bridging activity
ZCF13	orf19.2646	orf19.2646,orf19.10169	26.5122	22.513	44.2541	58.5717	1.06861	0.0102931	Predicted Zn(II)2Cys6 transcription factor; similar to but not the true ortholog of S. cerevisiae Hap1; mutants display decreased colonization of mouse kidneys
ADR1	orf19.2752	orf19.2752	50.4544	67.3307	103.232	146.803	1.08597	0.0238429	C2H2 transcription factor; ortholog of S. cerevisiae Adr1 but mutant phenotype suggests a different set of target genes; transposon mutation affects filamentous growth; Spider biofilm induced
CAP1	orf19.1623	orf19.9191	64.3752	56.154	127.566	129.235	1.09127	0.00986577	AP-1 bZIP transcription factor; apoptotic, oxidative stress response/resistance, multidrug resistance; nuclear in oxidative stress; complements S. cerevisiae yap1 mutant; oralpharyngeal candidasis-, human neutrophil, Spider biofilm induced
ZCF6	orf19.1497	orf19.1497	7.83258	8.67535	18.319	17.0836	1.10069	0.0474527	Putative transcription factor with zinc cluster DNA-binding motif; involved in virulence
C5_05180W_A	orf19.4011	orf19.4011	0.925561	0	1.33077	0.654219	1.10073	1	Similar to S. pombe mug180, a predicted esterase/lipase; highly induced during chlamydospore formation in both C. albicans and C. dubliniensis; flow model biofilm induced
AXL1	orf19.7342	orf19.7342	21.2814	23.3239	40.9483	54.7198	1.10082	0.738017	Putative endoprotease; induced by alpha factor; transcript is upregulated in an RHE model of oral candidiasis and in clinical isolates from HIV+ patients with oral candidiasis
ALS7	orf19.7400	orf19.7400	7.04898	5.66547	10.7906	16.744	1.11478	0.00986577	ALS family protein; hypermutable contingency gene; growth-regulated, downregulated in biofilm; two variable repeat regions; expression in S. cerevisiae does not confer adhesiveness; ALS family includes adhesins, cell-surface glycoproteins
DAL81	orf19.3252	orf19.3252	16.2961	19.4247	27.8934	49.7965	1.12096	0.00545557	Zn(II)2Cys6 transcription factor; ortholog of S. cerevisiae Dal81, involved in the regulation of nitrogen-degradation genes; required for yeast cell adherence to silicone substrate; Spider biofilm induced
GLN3	orf19.3912	orf19.3912	124.335	102.52	230.02	270.42	1.14143	0.0110995	GATA transcription factor, involved in regulation of nitrogen starvation-induced filamentous growth; regulates transcription of Mep2 ammonium permease; regulated by Gcn2 and Gcn4; mRNA binds She3; Spider biofilm induced
C4_05740C_A	orf19.1259	orf19.1259	10.0929	12.3739	26.5491	23.3622	1.15157	0.132087	Ortholog(s) have DNA binding, ubiquitin-protein transferase activity and role in histone catabolic process, histone ubiquitination, regulation of transcription from RNA polymerase II promoter in response to oxidative stress
C2_06780C_A	orf19.2229	orf19.223	7.2782	7.60844	16.4925	16.8455	1.16315	0.0193848	Ortholog(s) have ubiquitin-protein transferase activity, role in protein ubiquitination, response to ethanol, septin ring assembly and cytoplasm, nucleus localization
PTP1	orf19.6365	orf19.6365	99.9544	86.1675	218.767	210.873	1.20688	0.00775566	Phosphotyrosine-specific protein phosphatase; rat catheter biofilm induced
CMK1	orf19.5911	orf19.5911	41.71	31.9504	77.4036	92.6807	1.20729	0.00338059	Putative calcium/calmodulin-dependent protein kinase II; expression regulated upon white-opaque switching; biochemically purified Ca2+/CaM-dependent kinase is soluble, cytosolic, monomeric, and serine-autophosphorylated; Hap43p-repressed
CR_09750C_A	orf19.7547	orf19.7547	17.8684	17.4869	43.4575	38.6709	1.21595	0.768885	Ortholog(s) have phosphatidylinositol-3-phosphate binding, ubiquitin protein ligase activity and role in cytoplasm protein quality control by the ubiquitin-proteasome system, protein ubiquitination
C1_07660W_A	orf19.2778	orf19.1219	15.5739	13.5957	13.6119	55.3961	1.24229	0.0114985	Protein of unknown function; transcript is upregulated in clinical isolates from HIV+ patients with oral candidiasis
ROD1	orf19.1509	orf19.1509	80.4592	81.35	145.63	245.804	1.27448	0.00545557	Protein similar to S. cerevisiae Rod1;a membrane protein with a role in drug tolerance; repressed by Rgt1; mutant is viable
LYS143	orf19.4776	orf19.4776	14.0512	10.7272	22.519	39.3544	1.32023	0.00219792	Zn(II)2Cys6 transcription factor; ortholog of S. cerevisiae Lys14 involved in the regulation of lysine biosynthesis genes
MIG1	orf19.4318	orf19.4318	366.135	327.404	750.835	1021.67	1.35374	0.00495977	C2H2 transcription factor; repressor; regulates genes for carbon source utilization; Tup1-dependent and independent functions; hyphal, Hap43 and caspofungin repressed; Spider and flow model biofilm induced
UBC15	orf19.5337	orf19.5337	34.6102	40.9974	96.1025	98.2961	1.36242	0.00545557	Putative E2 ubiquitin-conjugating enzyme
RIM11	orf19.791	orf19.1593	62.6153	66.5373	164.094	172.681	1.38271	0.221297	Ortholog of S. cerevisiae Rim11; a protein kinase involved in meiosis and sporulation in S. cerevisiae; mutant is viable
DOA4	orf19.7207	orf19.7207	10.2564	11.4302	28.7027	28.4004	1.39676	0.000848373	Ortholog of S. cerevisiae Doa4;, a ubiquitin hydrolase involved in recycling ubiquitin from proteasome-bound ubiquitinated intermediates; oxidative stress-induced via Cap1; mutants are viable
SIP5	orf19.2458	orf19.2458	180.485	164.212	387.871	519.781	1.39681	0.00280222	Protein of unknown function; flow model, rat catheter and Spider biofilm induced
CDR1	orf19.6000	orf19.6000	252.811	210.06	422.659	808.518	1.41136	0.00156339	Multidrug transporter of ABC superfamily; transports phospholipids in an in-to-out direction; induced by beta-estradiol, progesterone, corticosteroid, or cholesterol; Spider biofilm induced
SPR1	orf19.2237	orf19.2237	0	0.304402	0.395151	0.416271	1.41447	1	Putative GPI-anchored protein; similar but not orthologous to S. cerevisiae Spr1, a sporulation-specific exo-1,3-beta-glucanase; mutant is viable
SSN8	orf19.7355	orf19.7355	13.1835	19.4693	35.9993	51.2573	1.41806	0.000848373	Ortholog of S. cerevisiae Ssn8; a component of RNA polymerase II holoenzyme; mutants are viable and are sensitive to hydrogen peroxide medium
C1_03660W_A	orf19.3064.1	orf19.7098	22.8754	20.2694	78.9364	40.6538	1.47084	0.195475	Ortholog of C. parapsilosis CDC317 : CPAR2_108915, Candida tenuis NRRL Y-1498 : CANTEDRAFT_102387, Debaryomyces hansenii CBS767 : DEHA2B06776g and Pichia stipitis Pignal : psti_CGOB_00149
UPC2	orf19.391	orf19.391	41.7125	38.4195	130.189	102.516	1.53805	0.000848373	Zn2-Cys6 transcript factor; regulator of ergosterol biosynthetic genes and sterol uptake; binds ERG2 promoter; induced by ergosterol depletion, by azoles, anaerobicity; macrophage/pseudohyphal-repressed; flow model biofilm induced
GZF3	orf19.2842	orf19.2842	111.05	113.259	285.725	471.298	1.75484	0.000848373	GATA-type transcription factor; oxidative stress-induced via Cap1; mutant has abnormal colony morphology and altered sensitivity to fluconazole, LiCl, and copper; Spider biofilm induced
CTA4	orf19.7374	orf19.7374	83.3089	59.3851	202.52	311.813	1.84978	0.000848373	Zn(II)2Cys6 transcription factor; induced by nitric oxide; induced by Mnl1 under weak acid stress; repressed upon adherence to polystyrene; Hap43-repressed; Spider biofilm induced
C5_04050W_A	orf19.1285	orf19.1277	26.1768	31.9886	107.766	104.921	1.8705	0.000848373	Plasma membrane-localized protein of unknown function; Hap43p-repressed gene
UME7	orf19.2745	orf19.2745	0.704221	0.534853	2.70007	1.86917	1.88269	0.16467	Putative transcription factor with zinc cluster DNA-binding motif; similar to S. cerevisiae Ume6p, which is a transcription factor involved in the regulation of meiotic genes
CIS2	orf19.6053	orf19.6053,orf19.13474	9.81634	6.73793	20.8859	41.7708	1.92027	0.000848373	Putative role in regulation of biogenesis of the cell wall; upregulated in biofilm; Gcn4p-regulated
CSR1	orf19.3794	orf19.3794	8.49513	11.5757	59.0664	38.9834	2.28842	0.000848373	Transcription factor; role in zinc homeostasis and regulation of Spider biofilm matrix; mutation affects filamentous growth; can suppress S. cerevisiae rok1 mutant inviability; Spider biofilm induced; mutants for abnormal Spider biofilms
C2_10630W_A	orf19.5342	orf19.5342	2.58264e-06	1.88575e-20	3.84365e-06	1.05176e-05	2.47526	1	Ortholog(s) have cytosol, extracellular region localization
C6_00450C_A	orf19.4214	orf19.4214	0	0	2.28552	1.44461	inf	0.0401706	Ortholog of Candida albicans WO-1 : CAWG_05313
References:
1.Diezmann S, Michaut M, Shapiro RS, Bader GD, Cowen LE. Mapping the Hsp90 genetic interaction network in Candida albicans reveals environmental contingency and rewired circuitry. PLoS Genet. 2012;8(3):e1002562.
2. O'Meara TR, Veri AO, Polvi EJ, Li X, Valaei SF, Diezmann S, Cowen LE. Mapping the Hsp90 Genetic Network Reveals Ergosterol Biosynthesis and Phosphatidylinositol-4-Kinase Signaling as Core Circuitry Governing Cellular Stress. PLoS Genet. 2016 Jun 24;12(6):e1006142. doi:10.1371/journal.pgen.1006142.
Notes:
1.Gene names and descriptions were copied from the CGD database (http://www.candidagenome.org/).
2. log2(YPD-K/YP-K)=Log2 Ratio(FPKM value of YPD-K/FPKM value of YP-K).
3. FPKM, fragments per kilobase of transcript per million.
4. Our analysis was based on the genomic sequence of C. albicans SC5314 (Assembly 22)
5. FPKM values of two repeats of each condition are presented (YP-K_1, YP-K_2,YPD-K_1 ,YPD-K_2).
6.Adjusted p-values (FDR) were calculated using the Cufflinks software (version2.2.1).
7. The reference (Diezmann et al., 2012) used the ORF_Assembly19 for analysis.Some ORF identifiers of the assembly19 have been renamed or removed from the assembly 22. The ORF IDs of assembly 19 and assemble 22 are presented.

## Sheet: Hsp90 genetic 1.5-fold change
Differentially expressed Hsp90 genetic interactors
Gene	ORF_assembly22	ORF_FROM_assembly19	FPKM of YP-K_1	FPKM of YP-K_2	FPKM of YPD-K_1	FPKM of YPD-K_2	Fold Change (YPD-K/YP-K)	Log2(YPD-K/YP-K)	FDR adjusted p-value	Functional description
ACE2	orf19.6124	orf19.6124	55.485	46.1948	24.7701	22.8101	0.467941	-1.0956	0.00862192	Transcription factor; similar to S. cerevisiae Ace2 and Swi5; regulates morphogenesis, cell separation, adherence, virulence in a mice; mutant is hyperfilamentous; rat catheter and Spider biofilm induced
ADR1	orf19.2752	orf19.2752	50.4544	67.3307	103.232	146.803	2.1228	1.08597	0.0238429	C2H2 transcription factor; ortholog of S. cerevisiae Adr1 but mutant phenotype suggests a different set of target genes; transposon mutation affects filamentous growth; Spider biofilm induced
ARG81	orf19.4766	orf19.4766	24.5452	22.3568	36.65	51.3246	1.87571	0.907437	0.0375838	Zn(II)2Cys6 transcription factor; required for utilization of ornithine as a nitrogen source and for wild-type resistance to caffeine; required for yeast cell adherence to silicone substrate
ARO80	orf19.3012	orf19.10530	9.1042	10.6164	15.4738	20.9491	1.84695	0.885144	0.0441044	Zn(II)2Cys6 transcription factor; transcriptional activator of aromatic amino acid catabolism; regulator of aromatic alcohol biosynthesis via the Ehrlich pathway; mutant is viable
C1_01910W_A	orf19.4532	orf19.4529	168.314	160.556	76.8308	96.8812	0.528209	-0.920818	0.0358571	Protein of unknown function; present in exponential and stationary growth phase yeast cultures
C1_03990W_A	orf19.4474	orf19.4474	15.3436	16.7775	23.1561	40.6124	1.98525	0.989323	0.0474527	Ortholog(s) have proteasome binding activity and role in cellular response to arsenic-containing substance, proteasome-mediated ubiquitin-dependent protein catabolic process
C1_07660W_A	orf19.2778	orf19.1219	15.5739	13.5957	13.6119	55.3961	2.36574	1.24229	0.0114985	Protein of unknown function; transcript is upregulated in clinical isolates from HIV+ patients with oral candidiasis
C1_14060W_A	orf19.7214	orf19.7214	157.251	225.951	62.7536	34.1861	0.252972	-1.98295	0.000848373	Glucan 1,3-beta-glucosidase; regulated by Nrg1, Tup1 and possibly Tac1; induced by NO and during cell wall regeneration; stationary phase enriched; possibly essential (UAU1 method); F-12/CO2 early biofilm induced; flow biofilm repressed
C2_07630C_A	orf19.1862	orf19.2217	314.796	287.953	209.617	103.363	0.519253	-0.94549	0.0342739	Possible stress protein; increased transcription associated with CDR1 and CDR2 overexpression or fluphenazine treatment; regulated by Sfu1, Nrg1, Tup1; stationary phase enriched protein; Spider biofilm induced
C4_00260W_A	orf19.5651	orf19.5651	56.303	55.68	119.684	88.0581	1.85512	0.891514	0.0450317	Ortholog(s) have histone demethylase activity (H3-dimethyl-K4 specific), histone demethylase activity (H3-monomethyl-K4 specific), histone demethylase activity (H3-trimethyl-K4 specific) activity
C4_03190W_A	orf19.2671	orf19.267	68.8378	44.669	24.4485	21.3233	0.403251	-1.31025	0.000848373	Protein with a predicted FAD-dependent pyridine nucleotide reductase domains; putative oxidoreductase; Plc1-regulated; possibly an essential gene, disruptants not obtained by UAU1 method
C5_04050W_A	orf19.1285	orf19.1277	26.1768	31.9886	107.766	104.921	3.65659	1.8705	0.000848373	Plasma membrane-localized protein of unknown function; Hap43p-repressed gene
CAP1	orf19.1623	orf19.9191	64.3752	56.154	127.566	129.235	2.13062	1.09127	0.00986577	AP-1 bZIP transcription factor; apoptotic, oxidative stress response/resistance, multidrug resistance; nuclear in oxidative stress; complements S. cerevisiae yap1 mutant; oralpharyngeal candidasis-, human neutrophil, Spider biofilm induced
CDR1	orf19.6000	orf19.6000	252.811	210.06	422.659	808.518	2.65988	1.41136	0.00156339	Multidrug transporter of ABC superfamily; transports phospholipids in an in-to-out direction; induced by beta-estradiol, progesterone, corticosteroid, or cholesterol; Spider biofilm induced
CEK2	orf19.460	orf19.460	321.789	320.214	162.394	115.647	0.433081	-1.20729	0.00592979	MAP kinase required for wild-type efficiency of mating; component of the signal transduction pathway that regulates mating; ortholog of S. cerevisiae Fus3; induced by Cph1, pheromone; transposon mutation affects filamentous growth
CIS2	orf19.6053	orf19.6053,orf19.13474	9.81634	6.73793	20.8859	41.7708	3.78494	1.92027	0.000848373	Putative role in regulation of biogenesis of the cell wall; upregulated in biofilm; Gcn4p-regulated
CMK1	orf19.5911	orf19.5911	41.71	31.9504	77.4036	92.6807	2.30903	1.20729	0.00338059	Putative calcium/calmodulin-dependent protein kinase II; expression regulated upon white-opaque switching; biochemically purified Ca2+/CaM-dependent kinase is soluble, cytosolic, monomeric, and serine-autophosphorylated; Hap43p-repressed
CSR1	orf19.3794	orf19.3794	8.49513	11.5757	59.0664	38.9834	4.88521	2.28842	0.000848373	Transcription factor; role in zinc homeostasis and regulation of Spider biofilm matrix; mutation affects filamentous growth; can suppress S. cerevisiae rok1 mutant inviability; Spider biofilm induced; mutants for abnormal Spider biofilms
CTA4	orf19.7374	orf19.7374	83.3089	59.3851	202.52	311.813	3.60445	1.84978	0.000848373	Zn(II)2Cys6 transcription factor; induced by nitric oxide; induced by Mnl1 under weak acid stress; repressed upon adherence to polystyrene; Hap43-repressed; Spider biofilm induced
DAL81	orf19.3252	orf19.3252	16.2961	19.4247	27.8934	49.7965	2.17492	1.12096	0.00545557	Zn(II)2Cys6 transcription factor; ortholog of S. cerevisiae Dal81, involved in the regulation of nitrogen-degradation genes; required for yeast cell adherence to silicone substrate; Spider biofilm induced
DOA4	orf19.7207	orf19.7207	10.2564	11.4302	28.7027	28.4004	2.6331	1.39676	0.000848373	Ortholog of S. cerevisiae Doa4;, a ubiquitin hydrolase involved in recycling ubiquitin from proteasome-bound ubiquitinated intermediates; oxidative stress-induced via Cap1; mutants are viable
DUN1	orf19.4002	orf19.4002	23.3632	25.0678	11.5311	8.85317	0.420891	-1.24848	0.00592979	Protein similar to S. cerevisiae Dun1p, which is a serine-threonine protein kinase involved in DNA damage cell-cycle checkpoint; induced under Cdc5p depletion
ECM14	orf19.299	orf19.299	144.661	175.58	44.8818	42.5779	0.273105	-1.87247	0.000848373	Has domain(s) with predicted metallocarboxypeptidase activity, zinc ion binding activity and role in proteolysis
ENA21	orf19.5170	orf19.5170	685.638	810.399	150.175	119.75	0.180427	-2.47051	0.000848373	Predicted P-type ATPase sodium pump; Gcn4p-regulated; flucytosine, amphotericin B, or ketoconazole-induced; osmotic stress-induced; overlaps orf19.5170.1, which is annotated as a blocked reading frame; Spider biofilm induced
GDE1	orf19.3936	orf19.3936	117.173	101.247	50.9305	49.2711	0.458756	-1.1242	0.0107075	Glycerophosphocholine phosphodiesterase; mutation confers hypersensitivity to 5-fluorouracil (5-FU); F-12/CO2 early biofilm induced
GLN3	orf19.3912	orf19.3912	124.335	102.52	230.02	270.42	2.206	1.14143	0.0110995	GATA transcription factor, involved in regulation of nitrogen starvation-induced filamentous growth; regulates transcription of Mep2 ammonium permease; regulated by Gcn2 and Gcn4; mRNA binds She3; Spider biofilm induced
GZF3	orf19.2842	orf19.2842	111.05	113.259	285.725	471.298	3.37489	1.75484	0.000848373	GATA-type transcription factor; oxidative stress-induced via Cap1; mutant has abnormal colony morphology and altered sensitivity to fluconazole, LiCl, and copper; Spider biofilm induced
HAL9	orf19.3190	orf19.3190,orf19.10701	20.6886	16.5947	35.0555	41.3769	2.05005	1.03566	0.0122951	Putative Zn(II)2Cys6 transcription factor; gene in zinc cluster region of Chr. 5; induced by Mnl1 in weak acid; similar to S. cerevisiae Hal9, a putative transcription factor involved in salt tolerance
HMS1	orf19.921	orf19.921	27.4322	31.1311	53.4921	68.1767	2.07756	1.05489	0.0114985	hLh domain Myc-type transcript factor; required for morphogenesis induced by elevated temperature or Hsp90 compromise; acts downstream of Pcl1; Spider biofilm induced
HSL1	orf19.4308	orf19.4308	37.4719	45.1702	19.8049	16.5359	0.439736	-1.18529	0.00219792	Probable protein kinase involved in determination of morphology during the cell cycle of both yeast-form and hyphal cells via regulation of Swe1p and Cdc28p; required for full virulence and kidney colonization in mouse systemic infection
LEU3	orf19.4225	orf19.11700	48.2124	42.0359	74.5659	101.94	1.95578	0.967746	0.0307021	Zn(II)2Cys6 transcription factor; predicted regulator branched-c ofhain amino acid biosynthesis genes; alkaline induced; induced by Mnl1 under weak acid stress; required for yeast cell adherence to silicone substrate; Spider biofilm induced
LYS143	orf19.4776	orf19.4776	14.0512	10.7272	22.519	39.3544	2.49706	1.32023	0.00219792	Zn(II)2Cys6 transcription factor; ortholog of S. cerevisiae Lys14 involved in the regulation of lysine biosynthesis genes
MIG1	orf19.4318	orf19.4318	366.135	327.404	750.835	1021.67	2.55574	1.35374	0.00495977	C2H2 transcription factor; repressor; regulates genes for carbon source utilization; Tup1-dependent and independent functions; hyphal, Hap43 and caspofungin repressed; Spider and flow model biofilm induced
PAN3	orf19.4010	orf19.4010	15.921	16.5414	34.1841	28.9502	1.94484	0.959653	0.0262411	Ortholog(s) have poly(A) binding, poly(A)-specific ribonuclease activity, role in nuclear-transcribed mRNA poly(A) tail shortening, postreplication repair and PAN complex localization
PEX14	orf19.1805	orf19.1805	44.3422	48.7965	92.9198	102.343	2.09648	1.06797	0.00945532	Ortholog(s) have peroxisome matrix targeting signal-1 binding, peroxisome matrix targeting signal-2 binding, protein binding, bridging activity
PTP1	orf19.6365	orf19.6365	99.9544	86.1675	218.767	210.873	2.30838	1.20688	0.00775566	Phosphotyrosine-specific protein phosphatase; rat catheter biofilm induced
RBE1	orf19.7218	orf19.7218	1428.95	1439.08	234.973	227.437	0.161229	-2.63282	0.000848373	Pry family cell wall protein; Rim101, Efg1, Ssn6, alkaline repressed; O-glycosylation; no GPI anchor predicted; ketoconazol induced; regulated by Sef1, Sfu1, Hap4; flow model biofilm induced; rat catheter and Spider biofilm repressed
ROD1	orf19.1509	orf19.1509	80.4592	81.35	145.63	245.804	2.41912	1.27448	0.00545557	Protein similar to S. cerevisiae Rod1;a membrane protein with a role in drug tolerance; repressed by Rgt1; mutant is viable
SIP5	orf19.2458	orf19.2458	180.485	164.212	387.871	519.781	2.63319	1.39681	0.00280222	Protein of unknown function; flow model, rat catheter and Spider biofilm induced
SPS20	orf19.4157	orf19.4157	188.226	169.597	101.32	82.7946	0.51454	-0.958646	0.0225887	Peroxisomal 2,4-dienoyl-CoA reductase; stationary phase enriched protein; Spider biofilm induced
SSN8	orf19.7355	orf19.7355	13.1835	19.4693	35.9993	51.2573	2.67226	1.41806	0.000848373	Ortholog of S. cerevisiae Ssn8; a component of RNA polymerase II holoenzyme; mutants are viable and are sensitive to hydrogen peroxide medium
STP4	orf19.909	orf19.909	302.219	119.456	413.712	437.572	2.01882	1.01351	0.0421234	C2H2 transcription factor; induced in core caspofungin response; colony morphology-related gene regulation by Ssn6; induced by 17-beta-estradiol, ethynyl estradiol; rat catheter and Spider biofilm induced
SYG1	orf19.768	orf19.768	29.0304	24.3272	8.95333	5.76895	0.275918	-1.85769	0.000848373	Ortholog(s) have role in signal transduction and plasma membrane localization
UBC15	orf19.5337	orf19.5337	34.6102	40.9974	96.1025	98.2961	2.57116	1.36242	0.00545557	Putative E2 ubiquitin-conjugating enzyme
UPC2	orf19.391	orf19.391	41.7125	38.4195	130.189	102.516	2.90402	1.53805	0.000848373	Zn2-Cys6 transcript factor; regulator of ergosterol biosynthetic genes and sterol uptake; binds ERG2 promoter; induced by ergosterol depletion, by azoles, anaerobicity; macrophage/pseudohyphal-repressed; flow model biofilm induced
XOG1	orf19.2990	orf19.10507	219.264	202.552	84.3936	121.109	0.487184	-1.03746	0.0200408	Exo-1,3-beta-glucanase; 5 glycosyl hydrolase family member; affects sensitivity to chitin and glucan synthesis inhibitors; not required for yeast-to-hypha transition or for virulence in mice; Hap43-induced; Spider biofilm induced
ZCF13	orf19.2646	orf19.2646,orf19.10169	26.5122	22.513	44.2541	58.5717	2.09741	1.06861	0.0102931	Predicted Zn(II)2Cys6 transcription factor; similar to but not the true ortholog of S. cerevisiae Hap1; mutants display decreased colonization of mouse kidneys
ZCF15	orf19.2753	orf19.2753	18.1643	22.6125	38.588	46.0851	2.07651	1.05416	0.00818221	Predicted Zn(II)2Cys6 transcription factor of unknown function; rat catheter biofilm induced
ZCF2	orf19.431	orf19.431	85.9458	67.3923	145.742	155.641	1.96548	0.974879	0.0312583	Zn(II)2Cys6 transcription factor, required for adaptation to reactive sulfur species; regulates sulfite tolerance through expression of SSU1 and CDG1; Hap43-repressed; Spider biofilm induced
References:
1.Diezmann S, Michaut M, Shapiro RS, Bader GD, Cowen LE. Mapping the Hsp90 genetic interaction network in Candida albicans reveals environmental contingency and rewired circuitry. PLoS Genet. 2012;8(3):e1002562.
2. O'Meara TR, Veri AO, Polvi EJ, Li X, Valaei SF, Diezmann S, Cowen LE. Mapping the Hsp90 Genetic Network Reveals Ergosterol Biosynthesis and Phosphatidylinositol-4-Kinase Signaling as Core Circuitry Governing Cellular Stress. PLoS Genet. 2016 Jun 24;12(6):e1006142. doi:10.1371/journal.pgen.1006142.
Notes:
1.Gene names and descriptions were copied from the CGD database (http://www.candidagenome.org/).
2. log2(YPD-K/YP-K)=Log2 Ratio(FPKM value of YPD-K/FPKM value of YP-K).
3. FPKM, fragments per kilobase of transcript per million.
4. Our analysis was based on the genomic sequence of C. albicans SC5314 (Assembly 22)
5. FPKM values of two repeats of each condition are presented (YP-K_1, YP-K_2,YPD-K_1 ,YPD-K_2).
6.Adjusted p-values (FDR) were calculated using the Cufflinks software (version2.2.1).
7. Differential expression genes must satisfy three criteria "at least one FPKM>20", "fold change >= 1.5 x" and "FDR <= .05" .
8. The reference (Diezmann et al., 2012) used the ORF_Assembly19 for analysis.Some ORF identifiers of the assembly19 have been renamed or removed from the assembly 22. The ORF IDs of assembly 19 and assemble 22 are presented.
