# Supplementary material for: Environment-induced same-sex mating in the yeast Candida albicans through the Hsf1–Hsp90 pathway
Source: PLoS Biol. 2019 Mar 13;17(3):e2006966. doi: 10.1371/journal.pbio.2006966 (PMC6415874; doi:10.1371/journal.pbio.2006966)
Supplement: S3 Data — (XLSX) [file pbio.2006966.s012.xlsx]

## Sheet: Fig 1C
Fig 1C	Relative expression levels of mating-related genes in the YPD-K and YP-K growth conditions.
		Sample-1	Sample-2	Mean	SEM	SD	t-test
MFA1	YPD-K	1	1.00367	1.00183	0.00183308	0.0025924	0.00181319
	YP-K	98.1839	90.2353	94.2096	3.97433	5.62056
MFα	YPD-K	1	1.10804	1.05402	0.0540193	0.0763948	0.00113237
	YP-K	112.68	105.407	109.044	3.63662	5.14296
FIG1	YPD-K	1	1.10293	1.05147	0.0727856	0.0727856	0.00300246
	YP-K	31.6791	35.237	33.458	2.51585	2.51585
FUS1	YPD-K	1	1.01291	1.00646	0.00913221	0.00913224	0.00142594
	YP-K	14.8581	15.9464	15.4022	0.769548	0.769547
STE2	YPD-K	1	0.979754	0.989877	0.0143158	0.0143159	0.00433411
	YP-K	12.6311	14.2775	13.4543	1.16418	1.16418
BAR1	YPD-K	1	1.02796	1.01398	0.0197709	0.0197709	0.00173155
	YP-K	14.7649	13.6652	14.215	0.777615	0.777615

## Sheet: Fig 3A
Fig 3A	Relative ROS levels of C. albicans on YP-K and YPD-K media.
Fluorescence value(FL)	YP-K				YPD-K
	1 Day	2 Days	3 Days	5 Days	1 Day	2 Days	3 Days	5 Days
Sample-1 FL/OD600	1.89565	0.791796	2.18046	3.52309	0.0336884	0.0916375	0.063787	0.216308
Sample-2 FL/OD600	1.4496	0.946028	1.59795	4.13497	0.0533407	0.107685	0.0524044	0.198048
Sample-3 FL/OD600	0.876351	1.43896	1.19212	3.47659	0.0443957	0.0808024	0.047896	0.325057
Mean	1.4072	1.05893	1.65684	3.71155	0.0438083	0.093375	0.0546958	0.246471
SD	0.510971	0.338032	0.496791	0.36743	0.00983927	0.0135253	0.00818956	0.0686673
t-test	0.00987614	0.00779747	0.00504053	8.79885e-05
Fluorescence intensity reflecting the ROS level was normalized according to the cell numbers.
Relative ROS levels (FL/OD600) are mean+SD X 107 of triplicate samples.

## Sheet: Fig 3C
Fig 3C	Relative expression levels of MFA1,MFα,FIG1,and FUS1 in response to H2O2 treatments on YPD-K medium.
		3 Days						5 Days
		Sample-1	Sample-2	Mean	SEM	SD	t-test	Sample-1	Sample-2	Mean	SEM	SD	t-test
MFA1	YPD-K	1	0.993498	0.996749	0.00325111	0.00459776	0.00512251	0.614857	0.625673	0.620265	0.00540799	0.00764805	0.00875898
	YPD-K+5mM H2O2	2.34096	2.16086	2.25091	0.0900504	0.12735		12.9085	15.4647	14.1866	1.27807	1.80746
MFα	YPD-K	1	1.22548	1.11274	0.112741	0.15944	0.349032	1.28935	1.23843	1.26389	0.0254608	0.0360071	0.00109218
	YPD-K+5mM H2O2	0.932512	1.00553	0.969023	0.0365111	0.0516344		2.90025	2.80819	2.85422	0.0460278	0.0650931
FIG1	YPD-K	1	1.22044	1.11022	0.110218	0.155872	0.65652	1.32448	1.24526	1.28487	0.0396094	0.0560162	0.0077704
	YPD-K+5mM H2O2	1.05845	1.04784	1.05314	0.00530887	0.0075078		3.07258	3.41039	3.24148	0.168906	0.238869
FUS1	YPD-K	1	1.14066	1.07033	0.0703317	0.0994641	0.430527	1.01497	0.939765	0.977368	0.0376026	0.0531781	0.0695419
	YPD-K+5mM H2O2	0.987389	1.01317	1.00028	0.0128884	0.0182269		1.43376	1.24631	1.34004	0.0937218	0.132543

## Sheet: Fig 3D
Fig 3D	Efficiency of same-sex mating on YPD-K medium with or without H2O2 treatment.
Mating efficiency
	YPD-K		YPD-K+5mM H2O2
	Bio repeat #1	Bio repeat #2	Bio repeat #1	Bio repeat #2
Sample 1	1.36364e-07	0	7.11111e-06	5.3125e-06
Sample 2	3.0303e-08	2.85714e-08	1.1625e-05	2.1875e-06
Sample 3	6.25e-08	2.94118e-07	7.86047e-06	3.72727e-06
Average of three samples	7.63889e-08	1.07563e-07	8.86553e-06	3.74242e-06
Mean of efficiency	9.1976e-08		6.30397e-06
SD	1.79984e-08		2.95782e-06

## Sheet: Fig 5B
Fig 5B	Relative expression levels of MFA1,MFα,FIG1,and FUS1 in the control and tetON-HSF1/hsf1 mutant .
			Control					tetON-HSF1/hsf1
		μg/mL	Sample-1	Sample-2	Mean	SEM	SD	Sample-1	Sample-2	Mean	SEM	SD	t-test
MFA1	YPD-K	Dox:0	1	0.937584	0.968792	0.031208	0.0441348	114.826	108.908	111.867	2.95899	4.18464	0.000711248
		Dox: 40	1.18224	0.959242	1.07074	0.111497	0.157681	15.1455	12.2303	13.6879	1.45763	2.0614	0.0131603
	YP-K	Dox:0	6.7603	6.578	6.66915	0.0911493	0.128905	187.85	199.828	193.839	5.98927	8.47011	0.00102261
		Dox: 40	4.65231	5.30696	4.97964	0.327326	0.462908	142.588	166.318	154.453	11.865	16.7797	0.00624678
MFα	YPD-K	Dox:0	1	1.14475	1.07237	0.0723744	0.102353	19.2682	19.1094	19.1888	0.0794172	0.112313	3.5175e-05
		Dox: 40	1.4179	1.42357	1.42073	0.00283831	0.00401398	2.5361	2.5807	2.5584	0.0222971	0.0315329	0.000390117
	YP-K	Dox:0	0.851504	0.709736	0.78062	0.070884	0.100245	61.4358	56.3069	58.8713	2.56442	3.62664	0.00194459
		Dox: 40	0.820434	0.788065	0.804249	0.0161846	0.0228885	34.1092	40.8515	37.4803	3.37112	4.76748	0.00834314
FIG1	YPD-K	Dox:0	1	0.9891	0.99455	0.0054501	0.00770761	7.13886	7.7882	7.46353	0.324668	0.45915	0.00251011
		Dox: 40	1.23021	1.34453	1.28737	0.0571619	0.0808392	1.29836	1.46953	1.38395	0.0855846	0.121035	0.447106
	YP-K	Dox:0	0.612167	0.730839	0.671503	0.0593359	0.0839137	14.0173	13.9318	13.9745	0.0427318	0.0604318	3.02113e-05
		Dox: 40	0.819992	0.787401	0.803697	0.0162955	0.0230453	12.4946	15.6642	14.0794	1.58481	2.24126	0.0139546
FUS1	YPD-K	Dox:0	1	0.95697	0.978485	0.021515	0.0304267	3.67205	3.7112	3.69163	0.019578	0.0276874	0.000114934
		Dox: 40	1.29448	1.58888	1.44168	0.147199	0.208171	1.30581	1.41762	1.36172	0.0559033	0.0790592	0.662033
	YP-K	Dox:0	0.688665	0.698103	0.693384	0.00471899	0.00667366	10.3465	10.3102	10.3284	0.0181937	0.0257298	3.80561e-06
		Dox: 40	0.773091	0.895084	0.834087	0.0609964	0.086262	7.57191	10.4258	8.99887	1.42695	2.01801	0.0292635

## Sheet: Fig 6B
Fig 6B	Relative expression levels of MFA1,MFα,FIG1,and FUS1 in the control and tetON-HSP90/hsp90 mutant .
		Control					tetON-HSP90/hsp90
		Sample-1	Sample-2	Mean	SEM	SD	Sample-1	Sample-2	Mean	SEM	SD	t-test
MFA1	YPD-K+40μg/mL Dox	1	0.911365	0.955682	0.0443177	0.0626746	7.98771	7.44822	7.71796	0.269744	0.381476	0.00163013
	YP-K+40μg/mL Dox	2.17431	2.0726	2.12346	0.0508526	0.0719165	21.6104	24.4166	23.0135	1.40307	1.98424	0.00448663
MFα	YPD-K+40μg/mL Dox	1	1.05488	1.02744	0.0274421	0.038809	3.25895	2.9761	3.11752	0.141426	0.200007	0.00471741
	YP-K+40μg/mL Dox	0.517687	0.603524	0.560605	0.0429188	0.0606963	11.2443	12.3675	11.8059	0.56158	0.794194	0.00249909
FIG1	YPD-K+40μg/mL Dox	1	1.23368	1.11684	0.11684	0.165237	1.72562	1.24798	1.4868	0.238824	0.337748	0.298644
	YP-K+40μg/mL Dox	0.591084	0.665061	0.628073	0.0369886	0.0523098	6.99953	7.47473	7.23713	0.237599	0.336015	0.00132114
FUS1	YPD-K+40μg/mL Dox	1	0.98086	0.99043	0.00956988	0.0135339	1.31773	1.26118	1.28945	0.0282739	0.0399853	0.00981816
	YP-K+40μg/mL Dox	0.503231	0.584094	0.543662	0.0404315	0.0571788	3.58451	3.32053	3.45252	0.131988	0.18666	0.00224448

## Sheet: Fig 7C
Fig 7C	Relative expression levels of CWT1 in YPD-K and YP-K media.
		Sample-1	Sample-2	Mean	SEM	SD	t-test
CWT1	YPD-K	1	1.05224	1.02612	0.0261187	0.0369374	0.0188234
	YP-K	0.432912	0.569378	0.501145	0.0682329	0.0964959

## Sheet: Fig 7D
Fig 7D	Relative expression levels of CWT1 in the control and tetON-HSF1/hsf1 on YP-K medium.
			Control					tetON-HSF1/hsf1
		μg/mL	Sample-1	Sample-2	Mean	SEM	SD	Sample-1	Sample-2	Mean	SEM	SD	t-test
CWT1	YP-K	Dox:0	1	1.37897	1.18949	0.189486	0.267974	0.37383	0.404432	0.389131	0.0153011	0.0216391	0.0520517
		Dox: 40	0.755409	0.864796	0.810103	0.0546935	0.0773483	0.397466	0.445779	0.421623	0.0241563	0.0341622	0.0228782
		Dox:100	0.808014	0.970142	0.889078	0.081064	0.114642	0.549839	0.555012	0.552426	0.00258681	0.0036583	0.0534315

## Sheet: Fig 8A
Fig 8A	Relative expression levels of MTLa2 in the corresponding controls, tetON-HSF1/hsf1, tetON-HSP90/hsp90, cwt1/cwt1 mutants, and MTLa2-overexpressing strain on YPD-K medium.
			Control					tetON-HSF1/hsf1
		μg/mL	Sample-1	Sample-2	Mean	SEM	SD	Sample-1	Sample-2	Mean	SEM	SD	t-test
MTLa2	YPD-K	Dox:0	1	1.17249	1.08624	0.0862435	0.121967	0.263908	0.222765	0.243337	0.0205715	0.0290925	0.010884
		Dox: 40	0.658815	0.995443	0.827129	0.168314	0.238032	0.328368	0.231331	0.279849	0.0485183	0.0686153	0.0889827
			Control					tetON-HSP90/hsp90
			Sample-1	Sample-2	Mean	SEM	SD	Sample-1	Sample-2	Mean	SEM	SD	t-test
MTLa2	YPD-K+40μg/mL Dox		1	1.27492	1.13746	0.137461	0.194399	0.439164	0.401471	0.420317	0.0188464	0.0266528	0.0354527
			Control					cwt1/cwt1
			Sample-1	Sample-2	Mean	SEM	SD	Sample-1	Sample-2	Mean	SEM	SD
MTLa2	YPD-K		1	1.13518	1.06759	0.0675897	0.0955863	0.830958	0.726378	0.778668	0.0522901	0.0739494
			WT+pACTS					WT+pACTS-MTLa2
			Sample-1	Sample-2	Mean	SEM	SD	Sample-1	Sample-2	Mean	SEM	SD	t-test
MTLa2	YPD-K		1	1.20221	1.10111	0.101106	0.142986	28.4504	23.0101	25.7303	2.72011	3.84682	0.0119952

## Sheet: Fig 8C
Fig 8C	Cwt1 binds to the promoters of MTLa2 and MFα by ChIP assays.
Strains	Media	MFα															MTLa2
		d1(MFα-1)					d2(MFα-2)					d3(MFα-3)
		Sample-1	Sample-2	Mean	SD	t-test	Sample-1	Sample-2	Mean	SD	t-test	Sample-1	Sample-2	Mean	SD	t-test	Sample-1	Sample-2	Mean	SD	t-test
NO tag	YP-K 1day	0.000177825	0.000279155	0.00022849	7.16507e-05		3.6942e-06	2.34458e-05	1.357e-05	1.39665e-05		3.8266e-05	1.38076e-05	2.60368e-05	1.72947e-05		0.000171687	0.000589836	0.000380761	0.000295676
TAP-tagged Cwt1	YP-K 1day	0.00197804	0.00118355	0.00158079	0.000561786	0.0776213	0.000548794	0.00123113	0.000889963	0.000482485	0.124068	0.00147216	0.00139001	0.00143108	5.809e-05	0.000929117	0.00114209	0.00111213	0.00112711	2.11845e-05	0.0706216
	YP-K 3days	0.014877	0.0134144	0.0141457	0.00103422	0.00276295	0.0175233	0.0161217	0.0168225	0.000991083	0.00173407	0.0207964	0.0207087	0.0207526	6.20112e-05	4.82376e-06	0.00882658	0.0121605	0.0104936	0.00235747	0.0265069
	YPD-K 1day	0.0126716	0.0108665	0.0117691	0.00127636	0.00607932	0.0117956	0.00854968	0.0101726	0.00229521	0.0245852	0.00988605	0.0142197	0.0120529	0.00306433	0.0309608	0.0146342	0.0135407	0.0140874	0.000773204	0.00181878
	YPD-K 3days	0.0140619	0.0113217	0.0126918	0.00193763	0.0118861	0.0175408	0.0177688	0.0176548	0.000161224	4.20718e-05	0.0162053	0.0152561	0.0157307	0.000671186	0.000912624	0.00990014	0.0113165	0.0106083	0.00100149	0.00517178
Percentages of input genomic DNA(%Input) are indicated.

[truncated: 8 more sheets: S3B Fig, S3C Fig, S3D Fig, S3E Fig, Fig S4A, Fig S5B, Fig S6B, Fig S6C]
